# Supplementary material for: Single-cell atlas comparison across vertebrates reveals evolution of auditory cell types and mechanisms for hair cell regeneration
Source: Research Square preprint supplement (doi:10.21203/rs.3.rs-4508608/v1), 2024-06-28
Supplement: Supplementary file 2 [file 920741d5a0e585c1c4bed23d.xlsx]

## Sheet: GG_gene_count_matrix
gene_id	GG1	GG2
gene-LOC124418406|LOC124418406	40	24
gene-LOC416695|LOC416695	20	16
gene-UCN3|UCN3	9	8
gene-MIR205B|MIR205B	0	0
rna-NR_031462.1|MIR205B	0	0
gene-LOC416696|LOC416696	1643	1691
gene-LOC107049418|LOC107049418	27	61
gene-RNF212B|RNF212B	2768	2839
gene-CARMIL3|CARMIL3	2153	2412
gene-DHRS4|DHRS4	3974	3932
gene-LOC112532872|LOC112532872	2432	2417
gene-LOC121109239|LOC121109239	891	1134
gene-LOC121106485|LOC121106485	1961	2069
gene-LOC121109235|LOC121109235	43	41
gene-HCLS1|HCLS1	1766	1875
gene-OR9Q1|OR9Q1	0	0
gene-MIR6708|MIR6708	0	2
rna-NR_105579.1|MIR6708	0	1
gene-MIR1604|MIR1604	0	1
rna-NR_035090.1|MIR1604	0	1
gene-LOC124417863|LOC124417863	0	0
gene-PAX4|PAX4	0	0
gene-ARF5|ARF5	2038	2177
gene-PPP6R2|PPP6R2	3164	3464
gene-SBF1|SBF1	12050	12748
gene-NCAPH2|NCAPH2	481	479
gene-TNPO3|TNPO3	3803	4059
gene-AHCYL2|AHCYL2	5195	5332
gene-LOC121109255|LOC121109255	0	0
gene-LOC121106832|LOC121106832	84	79
gene-LOC124417607|LOC124417607	523	551
gene-LOC121106805|LOC121106805	13	16
gene-LOC121110902|LOC121110902	1	1
gene-LOC121107380|LOC121107380	15	11
gene-LOC121110878|LOC121110878	1	1
gene-LOC121107381|LOC121107381	22	18
gene-LOC112531646|LOC112531646	1	1
gene-LOC121107383|LOC121107383	13	15
gene-LOC121110879|LOC121110879	1	1
gene-LOC121110880|LOC121110880	1	2
gene-LOC121109522|LOC121109522	2	3
gene-LOC121109525|LOC121109525	2	3
gene-LOC121109523|LOC121109523	1	3
gene-LOC112531610|LOC112531610	2	4
gene-CLC2DL4|CLC2DL4	1072	1128
gene-LOC121113333|LOC121113333	980	1133
gene-LOC776463|LOC776463	1170	1282
gene-LOC121113327|LOC121113327	1883	1909
gene-LOC121113351|LOC121113351	503	598
gene-LOC121109244|LOC121109244	1056	1039
gene-LOC101747821|LOC101747821	293	292
gene-LOC121113360|LOC121113360	543	464
gene-LOC121113328|LOC121113328	729	786
gene-LOC107055489|LOC107055489	2008	2264
gene-CLC2DL5|CLC2DL5	1938	2213
gene-LOC124418403|LOC124418403	1	2
gene-LOC121109243|LOC121109243	1353	1364
gene-LOC121113330|LOC121113330	1	0
gene-LOC121113331|LOC121113331	1182	1055
gene-LOC121109246|LOC121109246	3	4
gene-LOC124418405|LOC124418405	8181	8861
gene-CD69L|CD69L	2461	2484
gene-LOC121113329|LOC121113329	511	793
gene-LOC124418404|LOC124418404	281	164
gene-LOC107049847|LOC107049847	4095	4158
gene-LOC121113363|LOC121113363	142	159
gene-LOC430443|LOC430443	25	26
gene-GOLGB1|GOLGB1	9401	9193
gene-NME6|NME6	771	859
gene-RABL2A|RABL2A	600	577
gene-ACR|ACR	14	20
gene-ARSA|ARSA	3778	4311
gene-ACRL|ACRL	6	5
gene-MIR12207|MIR12207	8	4
rna-NR_161957.1|MIR12207	0	1
gene-SHANK3|SHANK3	6444	6429
gene-LOC121109250|LOC121109250	10	35
gene-LOC124417014|LOC124417014	6	19
gene-LOC124417137|LOC124417137	6	18
gene-GCC1|GCC1	1659	1790
gene-DENND6B|DENND6B	3221	3545
gene-MIR1651|MIR1651	1	0
rna-NR_035142.1|MIR1651	2	0
gene-LOC121109567|LOC121109567	27	10
gene-ADM2|ADM2	20	23
gene-MIOX|MIOX	10	9
gene-LMF2|LMF2	9428	9446
gene-LOC121109254|LOC121109254	411	382
gene-SCO2|SCO2	1112	1307
gene-IRF5|IRF5	554	577
gene-LOC112532892|LOC112532892	51	54
gene-SMO|SMO	5084	5048
gene-LOC121109256|LOC121109256	27	15
gene-LRGUK|LRGUK	1090	1213
gene-SLC35B4|SLC35B4	5917	6379
gene-LOC121109260|LOC121109260	13	18
gene-LOC121109676|LOC121109676	2	5
gene-LOC121109657|LOC121109657	2	0
gene-LOC121110529|LOC121110529	1	0
gene-LOC107053701|LOC107053701	5	8
gene-LOC121109689|LOC121109689	9	15
gene-LOC121109359|LOC121109359	8	14
gene-LOC121109268|LOC121109268	6	14
gene-LOC101750035|LOC101750035	0	0
gene-MIR6659|MIR6659	0	0
rna-NR_105528.1|MIR6659	0	0
gene-EXOC4|EXOC4	6424	6346
gene-LOC112532918|LOC112532918	7	0
gene-LOC107053233|LOC107053233	6	2
gene-LOC101747803|LOC101747803	7	10
gene-LOC121109261|LOC121109261	7	5
gene-LOC107055494|LOC107055494	2	7
gene-LOC101749355|LOC101749355	6	22
gene-LOC121109412|LOC121109412	13	12
gene-LOC121109273|LOC121109273	6	10
gene-LOC112532931|LOC112532931	32	37
gene-LOC101750196|LOC101750196	0	0
gene-LOC121109715|LOC121109715	0	5
gene-LOC121109712|LOC121109712	0	0
gene-LOC121109716|LOC121109716	0	3
gene-LOC121109274|LOC121109274	0	0
gene-LOC121109714|LOC121109714	0	4
gene-LOC107054205|LOC107054205	0	3
gene-LOC101748467|LOC101748467	0	2
gene-LOC107054320|LOC107054320	0	3
gene-CHCHD3|CHCHD3	4721	4856
gene-STRIP2|STRIP2	66	69
gene-LOC107053537|LOC107053537	360	446
gene-SMKR1|SMKR1	405	357
gene-NRF1|NRF1	2389	2690
gene-LOC121109257|LOC121109257	0	0
gene-UBE2H|UBE2H	6038	6339
gene-CPA2|CPA2	7	0
gene-CPA5|CPA5	0	5
gene-FBXO18|FBXO18	1740	2055
gene-ANKRD16|ANKRD16	904	982
gene-FAM208B|FAM208B	3870	4092
gene-GDI1|GDI1	17063	18566
gene-LOC107053421|LOC107053421	0	8
gene-ASB13|ASB13	886	975
gene-NET1|NET1	4185	4429
gene-MIR182|MIR182	7	4
rna-NR_161947.1|MIR182	2	2
gene-MIR96|MIR96	7	7
rna-NR_161944.1|MIR96	2	2
gene-MIR183|MIR183	5	8
rna-NR_035006.1|MIR183	1	1
gene-ZC3HC1|ZC3HC1	844	881
gene-KLHDC10|KLHDC10	3761	4065
gene-MIR6629|MIR6629	3	1
rna-NR_105497.2|MIR6629	1	0
gene-LOC100859230|LOC100859230	34	32
gene-TMEM209|TMEM209	686	840
gene-CPA1|CPA1	5	4
gene-CEP41|CEP41	8671	9064
gene-MEST|MEST	1215	1610
gene-COPG2|COPG2	10913	11511
gene-IL15RA|IL15RA	476	459
gene-CALML3|CALML3	128	84
gene-TUBAL3|TUBAL3	243	276
gene-PLXNA4|PLXNA4	4686	5197
gene-K123|K123	138	121
gene-IL2RA|IL2RA	76	90
gene-LOC101750931|LOC101750931	2249	2165
gene-PODXL|PODXL	4125	4160
gene-MKLN1|MKLN1	1585	1699
gene-PRKCQ|PRKCQ	1335	1377
gene-LOC121107859|LOC121107859	0	0
gene-SFMBT2|SFMBT2	1837	1931
gene-PFKFB3|PFKFB3	6836	7292
gene-LOC124417609|LOC124417609	4	0
gene-RBM17|RBM17	2405	2678
gene-LOC121107866|LOC121107866	66	65
gene-LOC419112|LOC419112	160	188
gene-LOC121107869|LOC121107869	29	54
gene-ITIH5|ITIH5	10996	12229
gene-LOC107054917|LOC107054917	0	0
gene-MIR1626|MIR1626	0	1
rna-NR_035114.1|MIR1626	0	1
gene-MIR1596|MIR1596	0	0
rna-NR_035082.3|MIR1596	0	0
gene-CELF2|CELF2	809	748
gene-TAF3|TAF3	3187	3393
gene-GATA3|GATA3	4371	4740
gene-ITIH2|ITIH2	1037	1067
gene-KIN|KIN	801	935
gene-ATP5C1|ATP5C1	8425	9064
gene-LOC121107878|LOC121107878	66	101
gene-LOC121107879|LOC121107879	4	0
gene-LOC107054553|LOC107054553	324	314
gene-LOC121107877|LOC121107877	45	42
gene-MCM10|MCM10	164	184
gene-CAMK1D|CAMK1D	6194	7006
gene-CCDC3|CCDC3	781	859
gene-LOC121107993|LOC121107993	20	35
gene-LOC121108015|LOC121108015	0	0
gene-OPTN|OPTN	6564	6860
gene-USP6NL|USP6NL	5280	6047
gene-LOC121107961|LOC121107961	7	6
gene-PROSER2|PROSER2	8529	9357
gene-UPF2|UPF2	5490	6053
gene-CDC123|CDC123	1939	2115
gene-ECHDC3|ECHDC3	1357	1546
gene-DHTKD1|DHTKD1	1373	1592
gene-SEC61A2|SEC61A2	1573	1862
gene-NUDT5|NUDT5	953	1144
gene-GRM3|GRM3	381	506
gene-PRPF18|PRPF18	2734	2914
gene-FRMD4A|FRMD4A	2536	2851
gene-MIR1460|MIR1460	0	0
rna-NR_035026.3|MIR1460	0	0
gene-LOC121108054|LOC121108054	0	2
gene-LOC121108055|LOC121108055	0	1
gene-PHYH|PHYH	2782	2731
gene-SEPHS1|SEPHS1	3583	3824
gene-BEND7|BEND7	3478	3886
gene-LOC121108053|LOC121108053	265	251
gene-SEMA3D|SEMA3D	1400	1381
gene-LOC121107435|LOC121107435	0	0
gene-SEMA3E|SEMA3E	787	952
gene-LOC112532981|LOC112532981	18	10
gene-SEMA3A|SEMA3A	773	1088
gene-FAM107B|FAM107B	3555	3771
gene-DCLRE1C|DCLRE1C	434	480
gene-MEIG1|MEIG1	173	210
gene-LOC121108070|LOC121108070	4	5
gene-HSPA14|HSPA14	1054	1238
gene-SUV39H2|SUV39H2	1310	1395
gene-LOC121108083|LOC121108083	33	59
gene-TMEM243|TMEM243	753	771
gene-DMTF1|DMTF1	2568	2612
gene-LOC121108084|LOC121108084	59	56
gene-ELAPOR2|ELAPOR2	2281	2373
gene-PCLO|PCLO	2136	2330
gene-LOC124417676|LOC124417676	0	0
gene-GNAT3|GNAT3	0	9
gene-LOC121109476|LOC121109476	0	0
gene-CD36|CD36	230	214
gene-LOC121109473|LOC121109473	84	97
gene-LOC121109475|LOC121109475	21	12
gene-SEMA3C|SEMA3C	3219	3639
gene-LOC121109474|LOC121109474	1	8
gene-CACNA2D1|CACNA2D1	2187	2687
gene-LOC112532986|LOC112532986	0	0
gene-LOC112532984|LOC112532984	2	2
gene-LOC107057089|LOC107057089	280	387
gene-HGF|HGF	2131	2515
gene-GNAI1|GNAI1	3408	3832
gene-LOC121109477|LOC121109477	21	15
gene-MAGI2|MAGI2	3963	4529
gene-PHTF2|PHTF2	1855	2183
gene-RSBN1L|RSBN1L	3162	3353
gene-PTPN12|PTPN12	1510	1626
gene-LOC121109479|LOC121109479	4	0
gene-TMEM60|TMEM60	1061	1291
gene-LOC107051625|LOC107051625	0	4
gene-GSAP|GSAP	1013	1380
gene-CCDC146|CCDC146	182	134
gene-FGL2|FGL2	499	685
gene-FAM185A|FAM185A	941	1137
gene-FBXL13|FBXL13	143	163
gene-LRRC17|LRRC17	145	182
gene-ARMC10|ARMC10	185	248
gene-NAPEPLD|NAPEPLD	3073	3278
gene-ORC5|ORC5	417	474
gene-TRNAG-CCC|TRNAG-CCC	1	1
gene-DNAJC2|DNAJC2	1432	1420
gene-SLC26A5|SLC26A5	1569	1636
gene-LOC112533002|LOC112533002	10	29
gene-RELN|RELN	3438	3937
gene-LOC124417187|LOC124417187	0	7
gene-PMPCB|PMPCB	1935	2463
gene-PSMC2|PSMC2	5631	5871
gene-CCDC71L|CCDC71L	754	705
gene-LOC124417288|LOC124417288	38	22
gene-PRKAR2B|PRKAR2B	415	409
gene-PIK3CG|PIK3CG	2655	2822
gene-KMT2E|KMT2E	14929	16283
gene-SRPK2|SRPK2	3525	3923
gene-LOC107051629|LOC107051629	25	21
gene-LOC101752215|LOC101752215	902	844
gene-PUS7|PUS7	1115	1076
gene-EFCAB10|EFCAB10	704	821
gene-ATXN7L1|ATXN7L1	1786	1718
gene-CDHR3|CDHR3	1226	1326
gene-LOC121109078|LOC121109078	7	13
gene-LHFPL3|LHFPL3	1128	1181
gene-LOC121108720|LOC121108720	5	7
gene-LOC107051628|LOC107051628	416	429
gene-LOC124417287|LOC124417287	5	3
gene-RINT1|RINT1	1351	1482
gene-SYPL1|SYPL1	15	11
gene-LOC107051630|LOC107051630	6	19
gene-NAMPTP1|NAMPTP1	2214	2629
gene-LOC121108850|LOC121108850	12	24
gene-SLC2A13|SLC2A13	4102	4441
gene-CPNE8|CPNE8	270	324
gene-GTSE1|GTSE1	45	26
gene-ALG10|ALG10	562	622
gene-TPRKB|TPRKB	850	743
gene-HBP1|HBP1	2509	2911
gene-LOC121108759|LOC121108759	80	65
gene-CBLL1|CBLL1	1628	1713
gene-LAMB4|LAMB4	107	152
gene-ERGIC2|ERGIC2	3143	3617
gene-LRRK2|LRRK2	1093	1234
gene-COG5|COG5	2665	2763
gene-GPR22|GPR22	63	65
gene-DUS4L|DUS4L	557	632
gene-LOC112533028|LOC112533028	7	12
gene-MIR2126|MIR2126	5	2
gene-BCAP29|BCAP29	4250	4621
rna-NR_035330.1|MIR2126	1	1
gene-SLC26A4|SLC26A4	3710	4117
gene-SLC26A3|SLC26A3	9	0
gene-DLD|DLD	8173	9471
gene-LAMB1|LAMB1	27773	28860
gene-LOC121108798|LOC121108798	711	786
gene-LOC112533030|LOC112533030	179	188
gene-TRMU|TRMU	1311	1464
gene-CELSR1|CELSR1	6678	6826
gene-C12orf40|C12orf40	273	256
gene-ABCD2|ABCD2	4492	4608
gene-LOC107051634|LOC107051634	67	60
gene-LOC107051632|LOC107051632	4	10
gene-KIF21A|KIF21A	21869	23760
gene-SIIL|SIIL	33	35
gene-LOC121109179|LOC121109179	0	0
gene-CERK|CERK	2113	2327
gene-GRAMD4|GRAMD4	5552	6060
gene-HIST1H2B5L|HIST1H2B5L	4028	4470
gene-LOC121108891|LOC121108891	10	9
gene-TBC1D22A|TBC1D22A	1623	1906
gene-FAM19A5|FAM19A5	329	475
gene-LOC112533144|LOC112533144	0	0
gene-LOC121107313|LOC121107313	24	18
gene-LOC121107315|LOC121107315	4	0
gene-LOC107051639|LOC107051639	3	0
gene-LOC107049439|LOC107049439	258	358
gene-LOC112533147|LOC112533147	2	0
gene-LOC112533149|LOC112533149	0	0
gene-LOC112533150|LOC112533150	4	0
gene-LOC112533148|LOC112533148	3	0
gene-LOC107050376|LOC107050376	6	11
gene-LOC112533151|LOC112533151	5	15
gene-PIM3|PIM3	4062	4294
gene-LOC107050120|LOC107050120	0	4
gene-LOC101748454|LOC101748454	40	51
gene-BRD1|BRD1	3053	3764
gene-ALG12|ALG12	1959	2086
gene-ZBED4|ZBED4	3750	3978
gene-CRELD2|CRELD2	2884	3209
gene-MLC1|MLC1	1308	1517
gene-IL17REL|IL17REL	3171	3352
gene-LOC112533152|LOC112533152	15	20
gene-MOV10L1|MOV10L1	2412	2917
gene-LOC107049700|LOC107049700	717	569
gene-PANX2|PANX2	339	437
gene-TRABD|TRABD	1677	1835
gene-LOC429348|LOC429348	44	17
gene-LOC121107325|LOC121107325	5	0
gene-LOC417741|LOC417741	10	0
gene-MAPK12|MAPK12	542	615
gene-MAPK11|MAPK11	1763	1962
gene-HDAC10|HDAC10	1278	1297
gene-LOC124417103|LOC124417103	395	474
gene-SELENOO|SELENOO	1676	1934
gene-TUBGCP6|TUBGCP6	1959	1997
gene-LOC121113482|LOC121113482	33	13
gene-ZNF800|ZNF800	308	414
gene-LOC121109516|LOC121109516	0	0
gene-POT1|POT1	708	744
gene-GRM8|GRM8	322	321
gene-LOC121109432|LOC121109432	4	4
gene-LOC121107027|LOC121107027	3	11
gene-LOC121107028|LOC121107028	18	18
gene-GPR37|GPR37	1718	1852
gene-LOC112533160|LOC112533160	8	16
gene-HYAL6|HYAL6	5	4
gene-ARL8BL|ARL8BL	1068	1256
gene-LMOD2|LMOD2	0	0
gene-ASB15|ASB15	4	0
gene-WASL|WASL	3700	3963
gene-PLXNB2|PLXNB2	13865	14817
gene-LOC121109514|LOC121109514	5	5
gene-MIR1693|MIR1693	2	0
rna-NR_035187.5|MIR1693	1	0
gene-LOC121109515|LOC121109515	15	13
gene-LOC121110877|LOC121110877	17	30
gene-NDUFA5|NDUFA5	3278	3660
gene-IQUB|IQUB	558	523
gene-SLC13A1|SLC13A1	7	9
gene-ATP6AP1|ATP6AP1	4289	4696
gene-CADPS2|CADPS2	1376	1247
gene-LOC121108990|LOC121108990	21	14
gene-WNT16|WNT16	41	39
gene-FAM3C|FAM3C	4596	5331
gene-CPED1|CPED1	1337	1520
gene-MIR1645|MIR1645	0	0
rna-NR_035136.1|MIR1645	0	0
gene-ING3|ING3	1496	1823
gene-TSPAN12|TSPAN12	909	1021
gene-LSM8|LSM8	380	417
gene-ANKRD26|ANKRD26	1506	1654
gene-KCND2|KCND2	388	505
gene-LOC100859665|LOC100859665	216	232
gene-LOC112533174|LOC112533174	68	49
gene-AASS|AASS	3072	3013
gene-PTPRZ1|PTPRZ1	24640	26275
gene-WNT2|WNT2	13	22
gene-CFTR|CFTR	53	88
gene-LOC121107644|LOC121107644	0	0
gene-CTTNBP2|CTTNBP2	2872	3173
gene-CAV1|CAV1	672	830
gene-ST7|ST7	1321	1312
gene-LOC101747342|LOC101747342	8	14
gene-CAPZA2|CAPZA2	4947	5572
gene-LOC121107739|LOC121107739	0	0
gene-CAV2|CAV2	2002	2348
gene-LOC121106667|LOC121106667	21	19
gene-MET|MET	4809	5375
gene-LOC112533188|LOC112533188	0	12
gene-TFEC|TFEC	30	55
gene-TES|TES	4076	4504
gene-PPP1R3A|PPP1R3A	69	53
gene-MDFIC|MDFIC	4344	4729
gene-FOXP2|FOXP2	790	961
gene-LOC121109003|LOC121109003	0	0
gene-LOC112533189|LOC112533189	0	0
gene-LOC121109004|LOC121109004	0	0
gene-LOC121107712|LOC121107712	4	0
gene-LOC121107432|LOC121107432	115	152
gene-LOC121107433|LOC121107433	0	17
gene-MIR1695|MIR1695	0	3
rna-NR_035189.1|MIR1695	0	1
gene-LOC107052656|LOC107052656	285	349
gene-BMT2|BMT2	1493	1715
gene-TMEM168|TMEM168	2482	2713
gene-LOC107052883|LOC107052883	0	0
gene-LOC107052650|LOC107052650	9741	10162
gene-GPR85|GPR85	575	550
gene-LOC107052654|LOC107052654	81	74
gene-AVPR2|AVPR2	8	8
gene-IMMP2L|IMMP2L	309	348
gene-LRRN3|LRRN3	779	840
gene-DNAJB9|DNAJB9	1709	1806
gene-THAP5|THAP5	1167	1133
gene-LSMEM1|LSMEM1	0	0
gene-LOC121107454|LOC121107454	0	0
gene-DOCK4|DOCK4	773	789
gene-IFRD1|IFRD1	3233	3481
gene-LOC121107452|LOC121107452	73	120
gene-LOC112533197|LOC112533197	23	29
gene-ZNF277|ZNF277	414	430
gene-PNPLA8|PNPLA8	2183	2203
gene-LOC121106847|LOC121106847	11	8
gene-GXYLT1|GXYLT1	1097	1303
gene-LOC121106846|LOC121106846	0	0
gene-CNTN1|CNTN1	2359	2702
gene-PDZRN4|PDZRN4	875	858
gene-NRCAM|NRCAM	4831	5853
gene-MIR12208|MIR12208	4	8
rna-NR_161958.1|MIR12208	2	2
gene-YAF2|YAF2	2122	2294
gene-ZCRB1|ZCRB1	1124	1132
gene-PPHLN1|PPHLN1	1155	1192
gene-MIR7447|MIR7447	0	4
rna-NR_105615.1|MIR7447	0	2
gene-PRICKLE1|PRICKLE1	2182	2471
gene-LOC121106849|LOC121106849	119	110
gene-ADAMTS20|ADAMTS20	1450	1732
gene-LOC124417300|LOC124417300	4	0
gene-LOC112533224|LOC112533224	7	0
gene-PRLL|PRLL	12	14
gene-DBX2|DBX2	266	354
gene-LOC121106854|LOC121106854	0	0
gene-LOC121106858|LOC121106858	0	0
gene-PUS7L|PUS7L	696	836
gene-IRAK4|IRAK4	998	1041
gene-TWF1|TWF1	2729	2894
gene-LOC121106856|LOC121106856	1245	1362
gene-TMEM117|TMEM117	1541	1874
gene-LOC124417301|LOC124417301	3	18
gene-LOC121106857|LOC121106857	18	4
gene-ARRDC5|ARRDC5	39	47
gene-LOC121106859|LOC121106859	122	132
gene-NELL2|NELL2	6313	6891
gene-LOC121107321|LOC121107321	7	7
gene-AMIGO2|AMIGO2	661	675
gene-LOC124417500|LOC124417500	0	7
gene-LOC112533249|LOC112533249	0	5
gene-SLC38A4|SLC38A4	4579	5366
gene-LOC101749586|LOC101749586	18	10
gene-LOC101749839|LOC101749839	0	0
gene-RPAP3|RPAP3	1476	1597
gene-ATP23|ATP23	1169	1164
gene-LRIG3|LRIG3	965	1077
gene-LOC121107711|LOC121107711	8	10
gene-SLC16A7|SLC16A7	2373	2868
gene-FAM19A2|FAM19A2	395	300
gene-LOC121109401|LOC121109401	0	0
gene-USP15|USP15	2558	2977
gene-AVPR1A|AVPR1A	72	66
gene-ANO6|ANO6	3691	3975
gene-ARID2|ARID2	2498	2924
gene-LOC121109002|LOC121109002	4	0
gene-LOC121113294|LOC121113294	0	0
gene-SCAF11|SCAF11	4326	4756
gene-LOC107052695|LOC107052695	127	92
gene-LOC121113293|LOC121113293	99	93
gene-LOC121109001|LOC121109001	41	38
gene-LOC124417320|LOC124417320	680	707
gene-SLC38A1|SLC38A1	10674	11515
gene-LOC101749506|LOC101749506	39	76
gene-SLC38A2|SLC38A2	26215	28734
gene-LOC124417321|LOC124417321	57	43
gene-LOC112531641|LOC112531641	1	0
gene-LOC112533248|LOC112533248	359	361
gene-MON2|MON2	4881	5632
gene-LOC101750768|LOC101750768	42	48
gene-LOC124417589|LOC124417589	1	7
gene-MIRLET7I|MIRLET7I	1	1
rna-NR_031393.1|MIRLET7I	1	1
gene-PPM1H|PPM1H	7239	7719
gene-LOC121109402|LOC121109402	35	30
gene-LOC121109403|LOC121109403	46	44
gene-SRGAP1|SRGAP1	4586	5030
gene-KICS2|KICS2	1105	1192
gene-XPOT|XPOT	7540	8385
gene-TBK1|TBK1	3546	3739
gene-TMEM5|TMEM5	532	625
gene-RPL18A|RPL18A	14932	16042
gene-LOC112531625|LOC112531625	20	24
gene-LOC121113431|LOC121113431	34	26
gene-LOC124417168|LOC124417168	287	323
gene-HMGA2|HMGA2	288	399
gene-LEMD3|LEMD3	2018	2180
gene-MSRB3|MSRB3	6576	7049
gene-RASSF3|RASSF3	5914	6619
gene-LOC121109404|LOC121109404	82	93
gene-GNS|GNS	27006	30410
gene-TBC1D30|TBC1D30	9876	10600
gene-WIF1|WIF1	2066	2231
gene-LOC121109157|LOC121109157	0	22
gene-HELB|HELB	2656	3189
gene-GRIP1|GRIP1	1947	1999
gene-LLPH|LLPH	859	895
gene-TMBIM4|TMBIM4	4947	5697
gene-LOC121110228|LOC121110228	0	0
gene-CAND1|CAND1	5056	5380
gene-LOC121109185|LOC121109185	600	632
gene-IFNG|IFNG	12	20
gene-IL22|IL22	5	0
gene-LOC112531553|LOC112531553	6	1
gene-DYRK2|DYRK2	1936	2061
gene-MDM1|MDM1	897	900
gene-NUP107|NUP107	1971	2333
gene-MDM2|MDM2	7155	7881
gene-LOC107052749|LOC107052749	2	0
gene-RAP1B|RAP1B	5794	6601
gene-SLC35E3|SLC35E3	7274	7935
gene-LOC101752108|LOC101752108	80	68
gene-CPM|CPM	1118	1230
gene-LOC121109492|LOC121109492	7	10
gene-CPSF6|CPSF6	7465	8270
gene-LOC107052751|LOC107052751	232	297
gene-LYZ|LYZ	65	67
gene-YEATS4|YEATS4	883	929
gene-FRS2|FRS2	1532	1789
gene-CCT2|CCT2	8018	8906
gene-KCNMB4|KCNMB4	63	84
gene-BEST3|BEST3	101	116
gene-MYRF|MYRF	0	0
gene-RAB3IP|RAB3IP	4655	4800
gene-CNOT2|CNOT2	2145	2342
gene-LOC121109495|LOC121109495	9	32
gene-PTPRB|PTPRB	2039	2327
gene-PTPRR|PTPRR	318	295
gene-LOC112533274|LOC112533274	0	0
gene-TMEM19|TMEM19	2575	2688
gene-LGR5|LGR5	804	842
gene-ZFC3H1|ZFC3H1	7045	7369
gene-LOC101747919|LOC101747919	20	23
gene-LOC124417663|LOC124417663	323	390
gene-RAB21|RAB21	3049	3391
gene-TPH2|TPH2	67	50
gene-LOC121107361|LOC121107361	7	2
gene-TBC1D15|TBC1D15	2107	2419
gene-LOC121109330|LOC121109330	4	0
gene-TRHDE|TRHDE	418	415
gene-LOC121107360|LOC121107360	0	0
gene-SYT1|SYT1	576	781
gene-LOC121109500|LOC121109500	0	0
gene-LOC101749434|LOC101749434	165	188
gene-PAWR|PAWR	2671	3001
gene-KCNC2|KCNC2	1370	1486
gene-CAPS2|CAPS2	873	952
gene-LOC112533299|LOC112533299	0	0
gene-NAP1L1|NAP1L1	14058	15443
gene-LOC107052799|LOC107052799	66	40
gene-BBS10|BBS10	1141	1169
gene-OSBPL8|OSBPL8	7694	8385
gene-CCDC107|CCDC107	2465	2462
gene-GLIPR1L1|GLIPR1L1	73	101
gene-GLIPR1|GLIPR1	134	144
gene-GLIPR1L|GLIPR1L	7541	7827
gene-KRR1|KRR1	1538	1627
gene-PHLDA1|PHLDA1	30717	31223
gene-LOC121109191|LOC121109191	11	22
gene-E2F7|E2F7	89	157
gene-LOC101749281|LOC101749281	40	44
gene-ZDHHC17|ZDHHC17	2191	2185
gene-CSRP2|CSRP2	30716	32708
gene-NAV3|NAV3	3658	3848
gene-LOC124417294|LOC124417294	8	7
gene-PPP1R12A|PPP1R12A	4554	4684
gene-LIN7A|LIN7A	1383	1660
gene-LOC121109043|LOC121109043	0	0
gene-LOC107052846|LOC107052846	0	1
gene-PPFIA2|PPFIA2	356	372
gene-ACSS3|ACSS3	810	773
gene-LOC121109174|LOC121109174	0	5
gene-METTL25|METTL25	461	406
gene-CCDC59|CCDC59	744	749
gene-LOC121113460|LOC121113460	93	73
gene-TMTC2|TMTC2	688	751
gene-SLC6A15|SLC6A15	665	682
gene-ALX1|ALX1	4	0
gene-TSPAN19|TSPAN19	32	32
gene-LRRIQ1|LRRIQ1	154	234
gene-LOC112533329|LOC112533329	73	61
gene-LOC427873|LOC427873	91	113
gene-LOC107052879|LOC107052879	11	6
gene-RASSF9|RASSF9	2647	2915
gene-LOC112533332|LOC112533332	24	41
gene-NTS|NTS	267	245
gene-KITLG|KITLG	1001	1153
gene-LOC112533343|LOC112533343	4	15
gene-CEP290|CEP290	1535	1838
gene-TMTC3|TMTC3	1470	1565
gene-C12orf50|C12orf50	610	736
gene-C12orf29|C12orf29	1857	2049
gene-LOC121107108|LOC121107108	9	0
gene-LOC101749704|LOC101749704	72	79
gene-PTPRQ|PTPRQ	11071	12396
gene-LOC121109290|LOC121109290	0	4
gene-MYF6|MYF6	0	9
gene-RPS16|RPS16	24760	25632
gene-OTOGL|OTOGL	47175	51944
gene-LOC121109501|LOC121109501	39	36
gene-LOC101751742|LOC101751742	1746	1771
gene-ATP2B1|ATP2B1	9587	10324
gene-DUSP6|DUSP6	6546	6919
gene-POC1B|POC1B	395	355
gene-GALNT4|GALNT4	1889	2026
gene-LOC124417665|LOC124417665	0	0
gene-LOC124417778|LOC124417778	0	0
gene-LOC112533369|LOC112533369	0	8
gene-LOC121109067|LOC121109067	3	0
gene-LOC107053003|LOC107053003	0	0
gene-LOC121109066|LOC121109066	69	69
gene-LOC112533359|LOC112533359	4	4
gene-BTG1|BTG1	20533	21882
gene-EPYC|EPYC	8502	9693
gene-LOC112533355|LOC112533355	330	346
gene-KERA|KERA	511	622
gene-LUM|LUM	15143	16610
gene-DCN|DCN	47746	52886
gene-LOC121109064|LOC121109064	42	32
gene-PLEKHG7|PLEKHG7	20	15
gene-EEA1|EEA1	6004	6723
gene-CEP83|CEP83	529	610
gene-LOC121109170|LOC121109170	2	14
gene-PLXNC1|PLXNC1	1899	2057
gene-TMCC3|TMCC3	1275	1318
gene-LOC121109172|LOC121109172	22	40
gene-SNAPC3|SNAPC3	724	702
gene-LOC101750670|LOC101750670	122	91
gene-LOC107052984|LOC107052984	7934	8461
gene-CRADD|CRADD	999	1174
gene-NUDT4|NUDT4	1547	1512
gene-UBE2N|UBE2N	5594	6132
gene-MRPL42|MRPL42	692	950
gene-SOCS2|SOCS2	3466	3684
gene-LOC107052933|LOC107052933	195	203
gene-LOC112533381|LOC112533381	147	118
gene-SNRPF|SNRPF	1246	1446
gene-AMDHD1|AMDHD1	219	213
gene-HAL|HAL	105	149
gene-LOC121109484|LOC121109484	103	119
gene-LOC107052954|LOC107052954	0	0
gene-ELK3|ELK3	1856	1971
gene-LTA4H|LTA4H	4993	5077
gene-TRNAD-GUC|TRNAD-GUC	1	1
gene-NR2C1|NR2C1	2108	2303
gene-VEZT|VEZT	2848	3389
gene-LOC101751743|LOC101751743	49	32
gene-METAP2|METAP2	4745	5223
gene-USP44|USP44	1881	1927
gene-NDUFA12|NDUFA12	2680	2706
gene-FGD6|FGD6	2189	2531
gene-LOC112533391|LOC112533391	42	29
gene-LOC121109142|LOC121109142	62	37
gene-NTN4|NTN4	3776	4112
gene-CFAP54|CFAP54	1151	1175
gene-NEDD1|NEDD1	1894	2094
gene-CDK17|CDK17	4281	4984
gene-LOC107052950|LOC107052950	0	0
gene-MIR1691|MIR1691	0	0
rna-NR_035184.1|MIR1691	0	0
gene-LOC121110859|LOC121110859	52	93
gene-LOC124416958|LOC124416958	817	1119
gene-MIR135A2|MIR135A2	1	1
rna-NR_031394.1|MIR135A2	2	2
gene-LOC112533395|LOC112533395	11	16
gene-TRNAD-GUC-2|TRNAD-GUC	0	0
gene-TRNAD-GUC-3|TRNAD-GUC	0	0
gene-LOC121109502|LOC121109502	4	10
gene-TRNAW-CCA|TRNAW-CCA	1	0
gene-LOC112533393|LOC112533393	13	9
gene-LOC101747799|LOC101747799	93	116
gene-UHRF1BP1L|UHRF1BP1L	2860	3270
gene-ACTR6|ACTR6	2211	2385
gene-ANKS1B|ANKS1B	382	398
gene-TMPO|TMPO	3932	4246
gene-SLC25A3|SLC25A3	21564	23422
gene-LOC112531638|LOC112531638	30	40
gene-IKBIP|IKBIP	1375	1512
gene-APAF1|APAF1	1201	1142
gene-SCYL2|SCYL2	3460	3830
gene-NR1H4|NR1H4	53	79
gene-SLC17A8|SLC17A8	4057	4435
gene-GAS2L3|GAS2L3	4747	5335
gene-PDE6H|PDE6H	18	32
gene-ARHGDIB|ARHGDIB	8956	8964
gene-LOC107048995|LOC107048995	4	0
gene-OC3|OC3	43	33
gene-SMCO3|SMCO3	4	5
gene-MGP|MGP	9856	10436
gene-ANO4|ANO4	251	269
gene-CNOT4|CNOT4	1937	1918
gene-STRA8|STRA8	29	35
gene-TMEM140|TMEM140	2411	2619
gene-AGBL3|AGBL3	113	87
gene-SLC5A8|SLC5A8	42	31
gene-UTP20|UTP20	2289	2453
gene-ARL1|ARL1	6256	6710
gene-NUP205|NUP205	5506	5792
gene-LOC107053813|LOC107053813	163	189
gene-LOC417937|LOC417937	333	464
gene-WDR91|WDR91	3140	3025
gene-C7orf49|C7orf49	882	865
gene-LOC121109486|LOC121109486	84	85
gene-APOLD1|APOLD1	2373	2529
gene-GPRC5A|GPRC5A	200	257
gene-DDX47|DDX47	1289	1269
gene-LOC124417604|LOC124417604	50	54
gene-HIST1H2BO|HIST1H2BO	534	655
gene-WBP11|WBP11	4039	4521
gene-LOC124417861|LOC124417861	5	0
gene-HIST1H2A3|HIST1H2A3	86	89
gene-LOC427882|LOC427882	182	175
gene-LOC121106462|LOC121106462	217	179
gene-HIST1H4D|HIST1H4D	431	500
gene-HIST1H3H|HIST1H3H	39	47
gene-LOC121110383|LOC121110383	23	27
gene-HIST1H46L2|HIST1H46L2	516	493
gene-HISTH2A4L1|HISTH2A4L1	210	238
gene-HIST1H2B8|HIST1H2B8	375	360
gene-LOC769852|LOC769852	31	32
gene-HIST1H46|HIST1H46	394	435
gene-HIST2H4B|HIST2H4B	478	412
gene-H2AFJ|H2AFJ	576	670
gene-HIST1H2B7|HIST1H2B7	596	550
gene-HIST1H110|HIST1H110	748	677
gene-HIST1H4B|HIST1H4B	216	234
gene-HIST2H3D|HIST2H3D	121	107
gene-HIST1H3A|HIST1H3A	54	50
gene-HIST1H4I|HIST1H4I	461	415
gene-HIST1H103|HIST1H103	27	36
gene-LOC121106538|LOC121106538	218	243
gene-HIST1H2A4|HIST1H2A4	230	296
gene-HIST2H3A|HIST2H3A	34	39
gene-HIST1H2A4L1|HIST1H2A4L1	113	123
gene-HIST1H46L6|HIST1H46L6	245	263
gene-HIST1H101|HIST1H101	4208	4205
gene-HIST1H2A4L2|HIST1H2A4L2	221	260
gene-HIST1H111L|HIST1H111L	72	62
gene-HIST1H2A4L3|HIST1H2A4L3	189	218
gene-HIST1H2B5|HIST1H2B5	231	269
gene-LOC121106438|LOC121106438	54	65
gene-LOC100857439|LOC100857439	43	54
gene-HIST1H2B7L4|HIST1H2B7L4	119	119
gene-HIST1H2A4L4|HIST1H2A4L4	341	385
gene-HIST1H111R|HIST1H111R	71	64
gene-HEBP1|HEBP1	2925	3032
gene-LOC417962|LOC417962	867	877
gene-LOC107053841|LOC107053841	21	26
gene-LOC121109324|LOC121109324	8	13
gene-EMP1|EMP1	726	879
gene-GSG1|GSG1	43	71
gene-FAM234B|FAM234B	7491	7953
gene-GRIN2B|GRIN2B	66	61
gene-LOC107053796|LOC107053796	0	0
gene-ATF7IP|ATF7IP	3819	4076
gene-LOC121109325|LOC121109325	0	0
gene-LOC121109322|LOC121109322	14	14
gene-GUCY2C|GUCY2C	19	19
gene-LOC121109323|LOC121109323	12	0
gene-PLBD1|PLBD1	1592	1662
gene-TTC26|TTC26	1687	1718
gene-GBE|GBE	270	303
gene-LOC417973|LOC417973	655	708
gene-LOC112531612|LOC112531612	0	1
gene-RRP7A|RRP7A	1054	1035
gene-SOCS1L|SOCS1L	574	758
gene-LOC121109327|LOC121109327	530	638
gene-UBN2|UBN2	5913	6165
gene-TRNAR-CCU|TRNAR-CCU	7	7
gene-FMC1|FMC1	1237	1161
gene-LUC7L2|LUC7L2	4057	4183
gene-LOC124416954|LOC124416954	1054	1121
gene-POLDIP3|POLDIP3	4841	5308
gene-LOC121109326|LOC121109326	32	35
gene-SERHL|SERHL	3564	3868
gene-RANGAP1|RANGAP1	2471	2710
gene-CHADL|CHADL	1764	1882
gene-L3MBTL2|L3MBTL2	2698	2814
gene-LOC101749282|LOC101749282	0	0
gene-EP300|EP300	7170	7559
gene-LOC107053731|LOC107053731	139	133
gene-RBX1|RBX1	2054	2315
gene-LOC101749129|LOC101749129	131	126
gene-XPNPEP3|XPNPEP3	2033	2108
gene-MIR1683|MIR1683	1	1
rna-NR_035176.1|MIR1683	1	1
gene-ST13P5|ST13P5	5934	6221
gene-SLC25A17|SLC25A17	1516	1653
gene-LOC107053703|LOC107053703	54	49
gene-FAM83F|FAM83F	1018	982
gene-LOC107053692|LOC107053692	0	0
gene-LOC121109331|LOC121109331	9	8
gene-GRAP2|GRAP2	216	257
gene-CACNA1I|CACNA1I	455	413
gene-LOC107053688|LOC107053688	23	12
gene-MIR12209|MIR12209	1	1
rna-NR_161959.2|MIR12209	1	1
gene-MKL1|MKL1	3305	3327
gene-SGSM3|SGSM3	2918	3085
gene-ADSL|ADSL	2533	2662
gene-TNRC6B|TNRC6B	5986	6667
gene-TCF20|TCF20	5438	5612
gene-WBP2NL|WBP2NL	6260	6595
gene-LOC100859314|LOC100859314	68	59
gene-CENPM|CENPM	51	83
gene-TNFRSF13C|TNFRSF13C	0	4
gene-CCDC134|CCDC134	1309	1449
gene-MEI1|MEI1	401	416
gene-CSDC2|CSDC2	149	198
gene-MIR1581|MIR1581	3	3
rna-NR_035066.2|MIR1581	1	1
gene-CYP2D6|CYP2D6	8242	8619
gene-NDUFA6|NDUFA6	2087	2258
gene-SMDT1|SMDT1	2639	2575
gene-FAM109B|FAM109B	4836	4799
gene-NAGA|NAGA	2218	2222
gene-SEPTIN3|SEPTIN3	2127	2322
gene-SHISA8|SHISA8	270	217
gene-SREBF2|SREBF2	18947	19349
gene-MIR33A|MIR33A	1	1
rna-NR_031395.1|MIR33A	2	0
gene-SNU13|SNU13	1758	1858
gene-XRCC6|XRCC6	916	1006
gene-DESI1|DESI1	8966	9980
gene-PMM1|PMM1	3010	3053
gene-POLR3H|POLR3H	1339	1371
gene-ACO2|ACO2	25834	26587
gene-PHF5A|PHF5A	2499	2834
gene-TOB2|TOB2	8870	9277
gene-LOC101748546|LOC101748546	3690	4422
gene-TEF|TEF	6339	6867
gene-ZC3H7B|ZC3H7B	14966	15682
gene-MFNG|MFNG	312	372
gene-LOC121108521|LOC121108521	27	9
gene-ELFN2|ELFN2	44	64
gene-SSTR3|SSTR3	15	52
gene-LOC112533483|LOC112533483	15	19
gene-CYTH4|CYTH4	427	541
gene-RAC2|RAC2	940	1009
gene-C1QTNF6|C1QTNF6	1043	1049
gene-KCTD17|KCTD17	834	810
gene-TMPRSS6|TMPRSS6	22	28
gene-IL2RB|IL2RB	216	200
gene-CSF2RB|CSF2RB	192	193
gene-CRCBL|CRCBL	434	505
gene-TEX33|TEX33	25	39
gene-MPST|MPST	2260	2334
gene-TST|TST	5088	4891
gene-HMOX1|HMOX1	948	956
gene-ISX|ISX	64	57
gene-LOC112533496|LOC112533496	11	19
gene-TOM1|TOM1	4512	4575
gene-HMGXB4|HMGXB4	1553	1705
gene-LOC107053589|LOC107053589	2406	2503
gene-LARGE1|LARGE1	3462	3499
gene-LOC112532681|LOC112532681	7	0
gene-NCF4|NCF4	301	237
gene-PVALB|PVALB	4055	4275
gene-IFT27|IFT27	673	814
gene-TXN2|TXN2	6021	6385
gene-MYH9|MYH9	27246	28481
gene-RBFOX2|RBFOX2	7704	8166
gene-LOC101747256|LOC101747256	0	0
gene-CACNG2|CACNG2	344	478
gene-EIF3D|EIF3D	11819	12443
gene-FOXRED2|FOXRED2	2071	2071
gene-MIR1742|MIR1742	23	28
rna-NR_035240.1|MIR1742	1	1
gene-LOC107053630|LOC107053630	71	91
gene-MB|MB	373	346
gene-RASD2|RASD2	1187	1062
gene-LOC112533487|LOC112533487	122	119
gene-MCM5|MCM5	925	934
gene-LOC107053686|LOC107053686	22	20
gene-MGAT3|MGAT3	19724	20010
gene-PDGFB|PDGFB	361	301
gene-CBX7|CBX7	16906	18060
gene-DNAL4|DNAL4	2627	2831
gene-SUN2|SUN2	10203	10365
gene-LOC121109334|LOC121109334	49	85
gene-DMC1|DMC1	130	129
gene-CSNK1E|CSNK1E	3041	3420
gene-TMEM184B|TMEM184B	10314	11075
gene-PICK1|PICK1	3487	3744
gene-LOC121108499|LOC121108499	131	164
gene-GGA1|GGA1	7174	7487
gene-LGALS2|LGALS2	124	126
gene-CARD10|CARD10	796	816
gene-LOC107053659|LOC107053659	23	11
gene-RPS19BP1|RPS19BP1	1316	1438
gene-ATF4|ATF4	17513	18562
gene-MIEF1|MIEF1	2684	3023
gene-LOC124417586|LOC124417586	1	1
gene-TAB1|TAB1	2051	2067
gene-SYNGR1|SYNGR1	21957	23525
gene-LOC121109332|LOC121109332	6	3
gene-RPL3|RPL3	55277	57323
gene-SNORD83A|SNORD83A	8	7
rna-NR_035352.5|SNORD83A	1	1
gene-CBX6|CBX6	7595	8192
gene-NPTXR|NPTXR	1275	1215
gene-LOC112533465|LOC112533465	163	125
gene-FAM20CL|FAM20CL	55	55
gene-GTPBP1|GTPBP1	6957	7450
gene-JOSD1|JOSD1	3302	3252
gene-TOMM22|TOMM22	6559	6663
gene-CBY1|CBY1	593	676
gene-LOC124417587|LOC124417587	178	183
gene-DDX17|DDX17	29938	32115
gene-KDELR3|KDELR3	1746	1888
gene-KCNJ4|KCNJ4	268	261
gene-MAFF|MAFF	2180	2254
gene-PLA2G6|PLA2G6	2731	2839
gene-BAIAP2L2|BAIAP2L2	2299	2267
gene-SLC16A8|SLC16A8	342	265
gene-LOC107053682|LOC107053682	20727	21382
gene-SOX10|SOX10	32125	32739
gene-POLR2F|POLR2F	5250	5598
gene-C22orf23|C22orf23	336	450
gene-MICALL1|MICALL1	7932	8522
gene-EIF3L|EIF3L	10675	11288
gene-ANKRD54|ANKRD54	4053	4550
gene-GALR3|GALR3	8	8
gene-LOC693258|LOC693258	5	0
gene-GCAT|GCAT	2187	2280
gene-H1F0|H1F0	434	452
gene-TRIOBP|TRIOBP	6434	6835
gene-NOL12|NOL12	1012	1133
gene-ADAP1L|ADAP1L	1486	1508
gene-UTS2RL|UTS2RL	152	178
gene-LGALS1A|LGALS1A	676	698
gene-PDXP|PDXP	1715	1805
gene-CDC42EP1|CDC42EP1	4912	4989
gene-SYN3|SYN3	9109	9558
gene-TIMP3|TIMP3	25716	27348
gene-LOC107053588|LOC107053588	171	165
gene-FBXO7|FBXO7	3895	4209
gene-BPIFCB|BPIFCB	19	21
gene-RTCB|RTCB	6606	6795
gene-PRDM4|PRDM4	2445	2639
gene-PWP1|PWP1	1646	1611
gene-BTBD11|BTBD11	2037	2163
gene-LOC121108090|LOC121108090	0	0
gene-CRY1|CRY1	6020	6153
gene-MTERF2|MTERF2	352	463
gene-LOC101749091|LOC101749091	54	63
gene-LOC112533502|LOC112533502	45	39
gene-TMEM263|TMEM263	3762	4209
gene-RIC8B|RIC8B	2001	1988
gene-RFX4|RFX4	58	52
gene-POLR3B|POLR3B	1407	1518
gene-TCP11X2|TCP11X2	3221	3895
gene-CKAP4|CKAP4	14423	15789
gene-NUAK1|NUAK1	1556	1959
gene-LOC107053559|LOC107053559	39	28
gene-C12orf75|C12orf75	915	1091
rna-NR_161960.1|MIR12210	1	0
gene-WASHC4|WASHC4	2589	2753
gene-ALDH1L2|ALDH1L2	977	1233
gene-SLC41A2|SLC41A2	2389	2734
gene-LOC121107115|LOC121107115	53	70
gene-APPL2|APPL2	6591	7482
gene-MIR12210|MIR12210	1	0
gene-LOC121107117|LOC121107117	706	629
gene-LOC121107114|LOC121107114	100	130
gene-LOC112533513|LOC112533513	12	27
gene-C12orf45|C12orf45	620	573
gene-CHST11|CHST11	3949	4338
gene-LOC107049021|LOC107049021	42	46
gene-ASCL1|ASCL1	89	40
gene-LOC107053530|LOC107053530	17	18
gene-LOC121109115|LOC121109115	0	0
gene-IGF1|IGF1	0	10
gene-PARPBP|PARPBP	50	62
gene-PMCH|PMCH	0	0
gene-NUP37|NUP37	1064	1041
gene-DRAM1|DRAM1	159	144
gene-GNPTAB|GNPTAB	6056	6637
gene-SYCP3|SYCP3	75	120
gene-CCDC53|CCDC53	2637	3009
gene-LOC121109120|LOC121109120	22	45
gene-LOC121109132|LOC121109132	22	30
gene-CHPT1|CHPT1	4869	5444
gene-LOC112533534|LOC112533534	0	0
gene-TRNAV-CAC|TRNAV-CAC	0	0
gene-SPIC|SPIC	0	0
gene-TBXAS1|TBXAS1	559	603
gene-MYBPC1|MYBPC1	210	283
gene-PARP12|PARP12	4409	4472
gene-LOC107053513|LOC107053513	23	41
gene-NFYB|NFYB	3407	3588
gene-TDG|TDG	1049	1023
gene-LOC121109113|LOC121109113	189	148
gene-MIR7450|MIR7450	0	0
rna-NR_105619.1|MIR7450	0	0
gene-LOC418086|LOC418086	0	12
gene-STAB2|STAB2	43	52
gene-LOC121109114|LOC121109114	0	0
gene-TXNRD1|TXNRD1	1490	1567
gene-HCFC2|HCFC2	3774	4330
gene-GLT8D2|GLT8D2	256	345
gene-C12orf73|C12orf73	1114	1104
gene-HSP90B1|HSP90B1	39591	41815
gene-LOC121109339|LOC121109339	5	0
gene-NT5DC3|NT5DC3	3042	3405
gene-SVOPL|SVOPL	62	71
gene-MIR12211|MIR12211	0	0
rna-NR_161961.1|MIR12211	0	0
gene-ATP6V0A4|ATP6V0A4	16108	17105
gene-TRIM24|TRIM24	1713	1787
gene-LOC112533564|LOC112533564	12	16
gene-HIPK2|HIPK2	24639	26020
gene-KIAA1549|KIAA1549	7629	7867
gene-TMEM213|TMEM213	13513	14537
gene-ADCK2|ADCK2	1335	1284
gene-LOC100858131|LOC100858131	341	301
gene-MRPS33|MRPS33	1732	1681
gene-BRAF|BRAF	1820	1651
gene-LOC121109173|LOC121109173	0	0
gene-NDUFB2|NDUFB2	9446	10481
gene-AKR1D1|AKR1D1	24	23
gene-CGTL|CGTL	3837	4185
gene-LOC418114|LOC418114	105	128
gene-DENND2A|DENND2A	9470	10403
gene-LOC112533565|LOC112533565	18	31
gene-LOC418108|LOC418108	308	344
gene-KDM7A|KDM7A	1813	1859
gene-SLC37A3|SLC37A3	4516	4933
gene-RAB19|RAB19	1815	1931
gene-MKRN4P|MKRN4P	6584	7037
gene-LOC121106531|LOC121106531	45	45
gene-LOC121107282|LOC121107282	4	0
gene-CHRM2|CHRM2	184	156
gene-LOC124417431|LOC124417431	0	0
gene-MIR490|MIR490	0	0
rna-NR_031556.1|MIR490	0	0
gene-PTN|PTN	11500	13480
gene-FAM180A|FAM180A	49	30
gene-SLC13A4|SLC13A4	41	60
gene-DENND11|DENND11	2793	2742
gene-WEE2|WEE2	115	120
gene-CREB3L2|CREB3L2	43525	47202
gene-DGKI|DGKI	1425	1508
gene-LOC121107600|LOC121107600	25	13
gene-TMEM178B|TMEM178B	256	256
gene-LOC121107273|LOC121107273	4	0
gene-LOC121109483|LOC121109483	372	454
gene-AGK|AGK	2068	2165
gene-SSBP1|SSBP1	1401	1609
gene-C7orf73|C7orf73	1190	1264
gene-SYT10|SYT10	165	184
gene-LOC121106700|LOC121106700	0	0
gene-MTPN|MTPN	10082	11742
gene-LOC121106699|LOC121106699	13	12
gene-FGD4|FGD4	2204	2534
gene-RESF1|RESF1	2881	3095
gene-MIR6700|MIR6700	0	0
rna-NR_105571.1|MIR6700	0	0
gene-BICD1|BICD1	2896	3195
gene-LOC121109212|LOC121109212	3	7
gene-LOC121109209|LOC121109209	5	8
gene-LOC121109210|LOC121109210	2	7
gene-LOC121109211|LOC121109211	6	6
gene-LOC121109080|LOC121109080	17	28
gene-DNM1L|DNM1L	6539	7346
gene-PKP2|PKP2	4680	4816
gene-YARS2|YARS2	1042	1083
gene-AMN1|AMN1	672	859
gene-LOC121109214|LOC121109214	0	0
gene-FAM60A|FAM60A	1181	1272
gene-MIR1593|MIR1593	0	0
rna-NR_035079.1|MIR1593	0	0
gene-CAPRIN2|CAPRIN2	2276	2247
gene-ETFBKMT|ETFBKMT	830	879
gene-LOC121109213|LOC121109213	15	15
gene-DENND5B|DENND5B	5280	5659
gene-LOC101752247|LOC101752247	8	16
gene-LOC121109051|LOC121109051	0	0
gene-SLC6A12|SLC6A12	63	59
gene-LOC107053441|LOC107053441	0	0
gene-IQSEC3|IQSEC3	928	1094
gene-IPO8|IPO8	4965	5927
gene-LOC121107096|LOC121107096	16	17
gene-TMTC1|TMTC1	13830	14631
gene-LOC121109050|LOC121109050	4	0
gene-DDX11|DDX11	790	787
gene-WASHC1|WASHC1	2538	2797
gene-LOC101748011|LOC101748011	15	10
gene-ZFP2|ZFP2	54	50
gene-CCDC77|CCDC77	182	189
gene-SLC6A13|SLC6A13	441	495
gene-LOC107053437|LOC107053437	45	47
gene-KDM5A|KDM5A	6976	7280
gene-LOC124417239|LOC124417239	8	0
gene-B4GALNT3|B4GALNT3	17035	17989
gene-NINJ2|NINJ2	3727	4186
gene-CECR6|CECR6	18	59
gene-IL17RA|IL17RA	1848	1967
gene-CECR1|CECR1	1001	1037
gene-HDHD5|HDHD5	1063	1238
gene-PEX26|PEX26	1337	1502
gene-BCL2L13|BCL2L13	11455	11366
gene-BID|BID	560	700
gene-MICAL3|MICAL3	11713	12493
gene-CECR2|CECR2	1697	1863
gene-ATP6V1E1|ATP6V1E1	3317	3296
gene-LOC121108239|LOC121108239	24	26
gene-WNK1|WNK1	12853	13388
gene-RAD52|RAD52	1507	1500
gene-ERC1|ERC1	5083	5351
gene-LOC121107293|LOC121107293	0	0
gene-LOC121107459|LOC121107459	0	0
gene-ADIPOR2|ADIPOR2	14401	14797
gene-CACNA1C|CACNA1C	1419	1512
gene-LOC121107504|LOC121107504	0	0
gene-LOC121107503|LOC121107503	0	3
gene-LOC124417602|LOC124417602	0	0
gene-LOC121107292|LOC121107292	67	93
gene-WNT5B|WNT5B	1840	1685
gene-FBXL14|FBXL14	1540	1606
gene-CACNA2D4|CACNA2D4	420	416
gene-CHUNK-1|CHUNK-1	43	63
gene-LRTM2|LRTM2	4779	4625
gene-DCP1B|DCP1B	1404	1417
gene-LOC121109205|LOC121109205	22	37
gene-AKR1B10|AKR1B10	1154	1149
gene-LOC121107601|LOC121107601	88	82
gene-LOC121108240|LOC121108240	76	93
gene-LOC121108241|LOC121108241	85	103
gene-LOC121108242|LOC121108242	107	138
gene-CALD1|CALD1	6021	6717
gene-PTPRO|PTPRO	510	492
gene-RERG|RERG	4057	4595
gene-EPS8|EPS8	3893	4187
gene-LOC124417470|LOC124417470	8	25
gene-LOC107053357|LOC107053357	98	106
gene-BPGM|BPGM	4274	4591
gene-TUBA8B|TUBA8B	67	49
gene-TUBA8A|TUBA8A	32	16
gene-USP41|USP41	5061	5618
gene-LOC107053352|LOC107053352	665	682
gene-AKR1B1|AKR1B1	13761	14499
gene-LOC418170|LOC418170	6439	6774
gene-AKR1E2|AKR1E2	2715	2930
gene-LOC425137|LOC425137	3534	3762
gene-LOC107053343|LOC107053343	137	108
gene-LOC121108252|LOC121108252	12	15
gene-DERA|DERA	865	835
gene-LOC112530033|LOC112530033	0	0
gene-STRAP|STRAP	3730	4002
gene-LOC107054199|LOC107054199	43	52
gene-SLC15A5|SLC15A5	9	23
gene-MGST1|MGST1	4845	5234
gene-LMO3|LMO3	583	610
gene-PIK3C2G|PIK3C2G	656	728
gene-RERGL|RERGL	1283	1588
gene-LOC121108329|LOC121108329	5	6
gene-LOC107054170|LOC107054170	10	0
gene-AEBP2|AEBP2	964	1031
gene-LOC101747667|LOC101747667	40	39
gene-LOC101747754|LOC101747754	74	61
gene-PLEKHA5|PLEKHA5	8644	9450
gene-PDE3A|PDE3A	2540	2867
gene-SLCO1B3|SLCO1B3	7	3
gene-LOC112530062|LOC112530062	8	15
gene-SLCO1C1|SLCO1C1	4	0
gene-SLCO1B1|SLCO1B1	4694	5111
gene-SOX5|SOX5	1310	1382
gene-LOC121108363|LOC121108363	0	4
gene-MIR6608-2|MIR6608-2	0	0
rna-NR_105597.2|MIR6608-2	0	0
gene-LOC121108365|LOC121108365	0	0
gene-LOC107054127|LOC107054127	0	0
gene-LOC121108351|LOC121108351	22	5
gene-LOC121108360|LOC121108360	6	0
gene-LOC121109509|LOC121109509	17	6
gene-SLCO1A2|SLCO1A2	1715	2020
gene-RECQL|RECQL	737	767
gene-BCAT1|BCAT1	1769	1908
gene-IAPP|IAPP	231	228
gene-PYROXD1|PYROXD1	557	465
gene-GOLT1B|GOLT1B	1341	1587
gene-LOC101748166|LOC101748166	92	77
gene-C3AR1L|C3AR1L	488	513
gene-ST8SIA1|ST8SIA1	2420	2611
gene-CMAS|CMAS	1585	1686
gene-C2CD5|C2CD5	3382	3594
gene-ETNK1|ETNK1	19751	23050
gene-ABCC9|ABCC9	1185	1320
gene-KCNJ8|KCNJ8	725	779
gene-LOC121107602|LOC121107602	11	14
gene-LOC121107604|LOC121107604	11	9
gene-LOC121113437|LOC121113437	3	5
gene-LOC121113438|LOC121113438	7	13
gene-LOC121109060|LOC121109060	79	93
gene-LOC418209|LOC418209	60	111
gene-LOC112530075|LOC112530075	0	7
gene-LOC124417413|LOC124417413	11	9
gene-SPX|SPX	0	0
gene-IRAG2|IRAG2	227	184
rna-NR_105620.1|MIR7451	0	0
gene-DNAI7|DNAI7	434	513
gene-ETFRF1|ETFRF1	152	142
gene-KRAS|KRAS	429	483
gene-LOC107054089|LOC107054089	38	51
gene-MIR7451|MIR7451	0	0
gene-LOC121109058|LOC121109058	2024	1885
gene-LOC121109059|LOC121109059	23	49
gene-RASSF8|RASSF8	5478	5916
gene-LOC121109063|LOC121109063	43	57
gene-GYS2|GYS2	0	8
gene-LDHB|LDHB	47440	49655
gene-BHLHE41|BHLHE41	3305	3257
gene-SSPN|SSPN	2532	2829
gene-ITPR2|ITPR2	4442	4866
gene-LOC124417415|LOC124417415	0	5
gene-LOC107054072|LOC107054072	19	22
gene-TM7SF3|TM7SF3	1058	1132
gene-MED21|MED21	1705	1966
gene-LOC101750972|LOC101750972	94	120
gene-INTS13|INTS13	6562	6809
gene-FGFR1OP2|FGFR1OP2	2030	2244
gene-BIK|BIK	122	132
gene-TTLL1|TTLL1	1483	1572
gene-SCUBE1|SCUBE1	1230	1320
gene-MCAT|MCAT	1573	1638
gene-TSPO|TSPO	2641	2831
gene-TTLL12|TTLL12	12343	12850
gene-EFCAB6|EFCAB6	477	398
gene-LOC121109073|LOC121109073	49	39
gene-LOC121109071|LOC121109071	0	7
gene-MPPED1|MPPED1	2536	2797
gene-LOC112530106|LOC112530106	0	4
gene-LOC121113373|LOC121113373	0	0
gene-KIAA1644|KIAA1644	1256	1379
gene-PRR5|PRR5	825	850
gene-LOC107054014|LOC107054014	155	168
gene-LOC121107177|LOC121107177	0	0
gene-LOC107054071|LOC107054071	15	14
gene-STK38L|STK38L	3342	3788
gene-ARNTL2|ARNTL2	1248	1595
gene-PPFIBP1|PPFIBP1	11281	11955
gene-ENDOUL|ENDOUL	35	64
gene-A4GALT|A4GALT	1339	1392
gene-ARFGAP3|ARFGAP3	2609	2689
gene-PACSIN2|PACSIN2	7012	7741
gene-LOC107054070|LOC107054070	45	36
gene-CYB5R1|CYB5R1	15456	16440
gene-LOC121107178|LOC121107178	410	478
gene-LOC124417891|LOC124417891	106	97
gene-LOC418222|LOC418222	59	38
gene-PHF21B|PHF21B	335	344
gene-LOC107053999|LOC107053999	35	51
gene-LOC112530109|LOC112530109	0	0
gene-ARHGAP8|ARHGAP8	1182	1262
gene-PNPLA3|PNPLA3	4007	4391
gene-PARVB|PARVB	474	579
gene-SULT4A1|SULT4A1	4534	5316
gene-SAMM50|SAMM50	3636	3976
gene-PARVG|PARVG	424	468
gene-UPK3A|UPK3A	4	4
gene-NUP50|NUP50	4508	4987
gene-KIAA0930|KIAA0930	4915	5461
gene-RIBC1|RIBC1	379	531
gene-FBLN1|FBLN1	5375	6114
gene-SMC1B|SMC1B	25	16
gene-LOC107053998|LOC107053998	21	18
gene-LOC121107699|LOC121107699	3	27
gene-LOC107053997|LOC107053997	7	11
gene-WNT7B|WNT7B	2726	2700
gene-ATXN10|ATXN10	940	937
gene-LOC124417677|LOC124417677	15	22
gene-BCL2L14|BCL2L14	37	52
gene-ETV6|ETV6	3494	3775
gene-ZC3HAV1|ZC3HAV1	4899	5182
gene-LOC101749705|LOC101749705	147	141
gene-LOC112530121|LOC112530121	180	180
gene-MIR1727-1|MIR1727-1	1	1
rna-NR_035223.1|MIR1727-1	1	1
gene-PPARA|PPARA	6442	6833
gene-MIRLET7A3|MIRLET7A3	0	0
rna-NR_031396.1|MIRLET7A3	0	0
gene-MIRLET7B|MIRLET7B	1	1
rna-NR_031397.1|MIRLET7B	1	1
gene-LOC121107607|LOC121107607	172	137
gene-CDPF1|CDPF1	972	1075
gene-PKDREJ|PKDREJ	160	201
gene-TTC38L|TTC38L	3274	3263
gene-LOC121107180|LOC121107180	51	30
gene-LOC426193|LOC426193	3300	3490
gene-LRP6|LRP6	3570	4078
gene-MIR12212|MIR12212	1	0
rna-NR_161962.1|MIR12212	1	0
gene-LOC101751329|LOC101751329	96	107
gene-MANSC1|MANSC1	2147	2187
gene-BORCS5|BORCS5	2088	2333
gene-DUSP16|DUSP16	3263	3015
gene-LOC124417392|LOC124417392	2	2
gene-LOC107053991|LOC107053991	95	81
gene-GPR19|GPR19	75	61
gene-CREBL2|CREBL2	4461	4697
gene-LOC121106764|LOC121106764	7	22
gene-LOC101751866|LOC101751866	46	32
gene-LOC124417679|LOC124417679	12	4
gene-LOC107053979|LOC107053979	19	43
gene-MANSC4|MANSC4	439	388
gene-MRPS35|MRPS35	955	988
gene-LOC124417680|LOC124417680	48	29
gene-KLHL42|KLHL42	711	739
gene-LOC101751545|LOC101751545	1505	1603
gene-LOC121107608|LOC121107608	0	0
gene-CDKN1B|CDKN1B	8786	9357
gene-PTHLH|PTHLH	1572	1923
gene-CCDC91|CCDC91	1692	1924
gene-LOC107054297|LOC107054297	84	101
gene-LOC121106532|LOC121106532	145	198
gene-LOC121109358|LOC121109358	4	7
gene-FAR2|FAR2	4711	5045
gene-RAD51AP1|RAD51AP1	939	977
gene-C12orf4|C12orf4	814	979
gene-LOC121109342|LOC121109342	0	0
gene-TIGAR|TIGAR	593	702
gene-CCND2|CCND2	5092	5487
gene-FGF6|FGF6	32	31
gene-FGF23|FGF23	7	15
gene-LOC112530139|LOC112530139	92	121
gene-LOC124417606|LOC124417606	64	59
gene-LOC121109365|LOC121109365	3	2
gene-LOC121109367|LOC121109367	18	16
gene-KCNA1|KCNA1	1139	1172
gene-KCNA5|KCNA5	173	191
gene-NTF3|NTF3	375	332
gene-ANO2|ANO2	644	707
gene-LOC124417639|LOC124417639	20	0
gene-NDUFA9|NDUFA9	3628	4007
gene-KCNA6|KCNA6	4860	4885
gene-LOC101748699|LOC101748699	137	168
gene-LOC121109364|LOC121109364	3	3
gene-VWF|VWF	4791	5411
gene-LOC107055508|LOC107055508	65	61
gene-LOC100858935|LOC100858935	446	543
gene-PRMT1|PRMT1	762	895
gene-TSPAN9|TSPAN9	75	100
gene-LOC124417652|LOC124417652	10	0
gene-PARP11|PARP11	919	977
gene-LOC121109395|LOC121109395	37	50
gene-LOC107054332|LOC107054332	332	343
gene-CD9|CD9	22252	23790
gene-NOBOX|NOBOX	250	346
gene-ARHGEF5|ARHGEF5	2356	2565
gene-LOC107055509|LOC107055509	29	24
gene-AICDA|AICDA	0	6
gene-FOXJ3|FOXJ3	6493	6489
gene-LOC107054373|LOC107054373	0	8
gene-LOC101748787|LOC101748787	13	18
gene-LOC121107507|LOC121107507	17	13
gene-LOC101748883|LOC101748883	12	6
gene-LOC112530152|LOC112530152	52	55
gene-SLC2A14|SLC2A14	2492	2682
gene-A2ML2|A2ML2	28	11
gene-LOC121106885|LOC121106885	0	0
gene-RIMKLB|RIMKLB	627	819
gene-A2ML1|A2ML1	485	578
gene-LOC124417106|LOC124417106	0	0
gene-MFAP5|MFAP5	1627	1609
gene-FOXM1|FOXM1	324	340
gene-RHNO1|RHNO1	9	14
gene-TULP3|TULP3	2711	2788
gene-ITFG2|ITFG2	3635	3861
gene-TEAD4|TEAD4	1737	1736
gene-LOC124417656|LOC124417656	248	282
gene-LOC121109408|LOC121109408	2	9
gene-LOC107054374|LOC107054374	42	47
gene-LOC112530151|LOC112530151	74	84
gene-FKBP4|FKBP4	12184	13274
gene-LOC101748309|LOC101748309	2995	3271
gene-NECAP1|NECAP1	7732	8110
gene-OVST|OVST	35	60
gene-OVSTL|OVSTL	204	170
gene-CD86|CD86	99	121
gene-CASR|CASR	870	770
gene-MIR6606|MIR6606	0	0
rna-NR_105474.3|MIR6606	0	0
gene-MAN1A2|MAN1A2	3102	3378
gene-A2ML3|A2ML3	4501	4713
gene-PHC1|PHC1	3286	3576
gene-M6PR|M6PR	10320	10945
gene-A2M|A2M	2270	2499
gene-CCDC58|CCDC58	263	323
gene-FBXO40|FBXO40	151	148
gene-VAMP1|VAMP1	5003	5183
gene-CNP1|CNP1	21	8
gene-IFFO1|IFFO1	4938	5377
gene-LPAR5|LPAR5	126	137
gene-ACRBP|ACRBP	8	0
gene-LOC101750932|LOC101750932	0	0
gene-PIANP|PIANP	1947	1902
gene-MLF2|MLF2	10978	11583
gene-CSTB|CSTB	4932	5346
gene-CSTA|CSTA	62	51
gene-FAM162A|FAM162A	2131	2283
gene-KPNA1|KPNA1	2873	2970
gene-TAPBPL|TAPBPL	3315	3084
gene-MIR6553|MIR6553	4	2
rna-NR_105420.2|MIR6553	2	2
gene-SCNN1A|SCNN1A	4613	4896
gene-MRPL51|MRPL51	2219	2152
gene-NCAPD2|NCAPD2	1157	1353
gene-LOC112531645|LOC112531645	3	5
gene-GAPDH|GAPDH	195803	203737
gene-NOP2|NOP2	1475	1499
gene-CHD4|CHD4	16922	18058
gene-LOC112531639|LOC112531639	23	25
gene-LOC101750826|LOC101750826	15	5
gene-ING4|ING4	2335	2490
gene-LOC124417614|LOC124417614	426	470
gene-ZNF384|ZNF384	3523	3653
gene-COPS7A|COPS7A	10197	9959
gene-LOC100859057|LOC100859057	36	42
gene-PTMS|PTMS	10755	11335
gene-LAG3|LAG3	221	136
gene-CD4|CD4	290	257
gene-GPR162|GPR162	4922	4897
gene-P3H3|P3H3	2770	2897
gene-GNB3|GNB3	1382	1379
gene-LOC107054533|LOC107054533	23	29
gene-PEX5|PEX5	2918	3013
gene-EPHA1|EPHA1	1180	1251
gene-TRPV6|TRPV6	4	0
gene-KEL|KEL	33	54
gene-LOC107054566|LOC107054566	1	0
gene-CDCA3|CDCA3	73	69
gene-LOC121106944|LOC121106944	0	10
gene-ATN1|ATN1	12188	12731
gene-PTPN6|PTPN6	1606	1804
gene-USP5|USP5	6018	6477
gene-TPI1|TPI1	17487	18770
gene-LRRC23|LRRC23	657	750
gene-ENO2|ENO2	8758	9344
gene-C12orf57|C12orf57	5651	5662
gene-LOC112531617|LOC112531617	1	1
gene-PHB2|PHB2	8617	9098
gene-EMG1|EMG1	381	439
gene-LPCAT3|LPCAT3	1918	1911
gene-C1S|C1S	9156	9853
gene-C1R|C1R	4831	5134
gene-RBP5|RBP5	3323	3427
gene-CLSTN3|CLSTN3	6374	6511
gene-LOC418298|LOC418298	491	605
gene-EPHB6|EPHB6	2309	2513
gene-LOC112530254|LOC112530254	6	3
gene-LOC121106429|LOC121106429	0	0
gene-LOC121107389|LOC121107389	0	0
gene-LOC107054567|LOC107054567	0	0
gene-PRSS2|PRSS2	0	0
gene-PRSS3|PRSS3	0	0
gene-KLK7|KLK7	0	4
gene-LOC121107393	0	3
gene-LOC121107405|LOC121107405	0	0
gene-LOC107049069|LOC107049069	0	0
gene-LOC107049836|LOC107049836	0	0
gene-LOC121106486|LOC121106486	0	0
gene-LOC121107407|LOC121107407	0	5
gene-LOC768817|LOC768817	0	0
gene-TRBV6-5|TRBV6-5	401	401
gene-LOC112530242|LOC112530242	17	29
gene-LOC107054571|LOC107054571	26	19
gene-LOC112530244|LOC112530244	9	13
gene-LOC107055606|LOC107055606	9	20
gene-LOC121107404|LOC121107404	3	4
gene-LOC121107402|LOC121107402	3	9
gene-LOC112530246|LOC112530246	4	11
gene-LOC112529966|LOC112529966	24	39
gene-FAM131B|FAM131B	1369	1491
gene-LOC107054541|LOC107054541	438	402
gene-CLCN1|CLCN1	1709	1831
gene-RAP1GAP3|RAP1GAP3	1790	1902
gene-TMEM139|TMEM139	62	82
gene-GSTK1|GSTK1	3951	4216
gene-LOC418303|LOC418303	52	60
gene-TAS2R40|TAS2R40	0	0
gene-ZYX|ZYX	6599	7111
gene-LOC124417615|LOC124417615	69	57
gene-CASP2|CASP2	1208	1355
gene-LOC121107025|LOC121107025	127	128
gene-LOC107055487|LOC107055487	86	109
gene-LOC121107026|LOC121107026	42	79
gene-LOC107055725|LOC107055725	84	109
gene-LOC124417616|LOC124417616	17	12
gene-LOC769174|LOC769174	6	0
gene-HSD3B1|HSD3B1	147	148
gene-LOC107054599|LOC107054599	60	37
gene-LOC107055486|LOC107055486	81	63
gene-LOC112530226|LOC112530226	42	36
gene-LOC112530268|LOC112530268	4	8
gene-LOC112530264|LOC112530264	78	75
gene-HAO2|HAO2	7	11
gene-LOC101750690|LOC101750690	753	804
gene-LOC100857210|LOC100857210	17	21
gene-TBX15|TBX15	834	978
gene-LOC121108209|LOC121108209	10	26
gene-LOC100859625|LOC100859625	248	295
gene-SYCE3|SYCE3	35	45
gene-STYK1|STYK1	3044	3473
gene-LOC121107415|LOC121107415	0	0
gene-LOC769044|LOC769044	44	35
gene-YBX3|YBX3	5190	5120
gene-GABARAPL1|GABARAPL1	11452	11408
gene-TNFRSF1A|TNFRSF1A	1662	2058
gene-POLQ|POLQ	157	209
gene-LOC121109311|LOC121109311	34	32
gene-METTL16|METTL16	1128	1126
gene-STXBP5L|STXBP5L	3843	4308
gene-GTF2E1|GTF2E1	2401	2271
gene-RABL3|RABL3	1858	1926
gene-SPAG17|SPAG17	958	1034
gene-GDAP2|GDAP2	1052	1148
gene-SIDT1|SIDT1	1165	1289
gene-SPICE1|SPICE1	2535	2739
gene-TRNAS-AGA-3|TRNAS-AGA	0	1
gene-TRNAS-AGA-4|TRNAS-AGA	0	0
gene-VTCN1|VTCN1	405	312
gene-CTC1|CTC1	1760	1727
gene-WDR3|WDR3	2211	2317
gene-FAM46C|FAM46C	528	605
gene-DUSP12|DUSP12	812	762
gene-ATP6V1A|ATP6V1A	9985	10534
gene-LOC121109310|LOC121109310	30	59
gene-NAA50|NAA50	6466	6479
gene-LOC107054727|LOC107054727	65	85
gene-USF3|USF3	3678	3859
gene-TRNAS-AGA|TRNAS-AGA	1	0
gene-TRNAS-AGA-2|TRNAS-AGA	1	3
gene-TRIM45|TRIM45	1069	1157
gene-HGD|HGD	18	27
gene-NDUFB4|NDUFB4	5918	6169
gene-LOC121109313|LOC121109313	73	68
gene-FSTL1|FSTL1	20424	21322
gene-LRRC58|LRRC58	3362	3412
gene-MIR6609|MIR6609	1	0
rna-NR_105477.1|MIR6609	1	0
gene-GPR156|GPR156	1072	1318
gene-GSK3A|GSK3A	5996	6590
gene-LOC121109314|LOC121109314	0	4
gene-MAATS1|MAATS1	1280	1452
gene-LOC107054681|LOC107054681	14	0
gene-LOC107054682|LOC107054682	38	52
rna-NR_035354.1|MIR3539	0	0
gene-ARHGAP31|ARHGAP31	1990	2055
gene-MIR3539|MIR3539	1	1
gene-UPK1B|UPK1B	3958	4091
gene-LOC121106587|LOC121106587	12	7
gene-C3orf30|C3orf30	45	33
gene-IGSF11|IGSF11	5582	6181
gene-LSAMP|LSAMP	7088	7324
gene-LOC121106590|LOC121106590	0	0
gene-LOC101751152|LOC101751152	0	0
gene-LOC121106588|LOC121106588	0	0
gene-LOC121106591|LOC121106591	0	0
gene-LOC121106589|LOC121106589	0	0
gene-LOC101750994|LOC101750994	415	328
gene-GAP43|GAP43	78	100
gene-LOC124417493|LOC124417493	33	11
gene-CLDND1|CLDND1	6106	6496
gene-APOV1|APOV1	0	0
gene-ILDR1|ILDR1	1553	1496
gene-CFAP44|CFAP44	1136	1173
gene-BOC|BOC	5345	5588
gene-LOC121106631|LOC121106631	365	397
gene-SPIRE1L|SPIRE1L	30	26
gene-NEPRO|NEPRO	932	950
gene-CD200R1A|CD200R1A	341	252
gene-CD200R1B|CD200R1B	42	39
gene-TAF13|TAF13	2032	2103
gene-GTPBP8|GTPBP8	1534	1588
gene-ZBTB20|ZBTB20	22225	22926
gene-LOC121106595|LOC121106595	0	0
gene-DRD3|DRD3	375	363
gene-ZDHHC23|ZDHHC23	3052	3092
gene-GRAMD1C|GRAMD1C	3918	3850
gene-LOC418355|LOC418355	198	254
gene-QTRT2|QTRT2	1530	1639
gene-CCDC191|CCDC191	1354	1410
gene-LOC121106604|LOC121106604	449	518
gene-PLA2G10L|PLA2G10L	460	446
gene-SLC19A2|SLC19A2	427	516
gene-F5|F5	1265	1484
gene-CCDC80|CCDC80	5208	5722
gene-SLC35A5|SLC35A5	2515	2860
gene-ATG3|ATG3	1826	1986
gene-PLA1A|PLA1A	187	243
gene-LOC121106553|LOC121106553	0	0
gene-LOC101749284|LOC101749284	35	40
gene-SLC22A15|SLC22A15	1331	1424
gene-VANGL1|VANGL1	1805	1931
gene-B4GALT4|B4GALT4	7398	7693
gene-COX17|COX17	2438	2511
gene-POPDC2|POPDC2	186	255
gene-ATP1A1|ATP1A1	286059	304060
gene-LOC112530292|LOC112530292	103	85
gene-MAB21L3|MAB21L3	441	432
gene-NHLH2|NHLH2	30	70
gene-CASQ2|CASQ2	105	170
gene-CHD1L|CHD1L	1342	1568
gene-FAAHL|FAAHL	9159	10092
gene-TMEM39A|TMEM39A	4050	4169
gene-LOC121106585|LOC121106585	940	973
gene-B4GALTL|B4GALTL	1904	2019
gene-B3GAT1L|B3GAT1L	33543	35171
gene-XCL1|XCL1	20	25
gene-TRNAI-AAU|TRNAI-AAU	1	1
gene-TRNAS-AGA-5|TRNAS-AGA	0	0
gene-TRNAI-AAU-2|TRNAI-AAU	1	1
gene-TTF2|TTF2	1221	1289
gene-TBX19|TBX19	152	140
gene-GPR161|GPR161	950	1025
gene-SFT2D2|SFT2D2	3473	3569
gene-TIPRL|TIPRL	2409	2863
gene-CCDC181|CCDC181	239	275
gene-NME7|NME7	880	956
gene-LOC121106658|LOC121106658	58	105
gene-MIR1690|MIR1690	0	0
rna-NR_035183.1|MIR1690	0	0
gene-BLZF1|BLZF1	1881	2028
gene-LOC112530330|LOC112530330	13	9
gene-ATP1B1|ATP1B1	29763	31533
gene-DPT|DPT	69	56
gene-ADGRG7|ADGRG7	11	3
gene-TMEM45B|TMEM45B	506	469
gene-TMEM30CP|TMEM30CP	82	90
gene-CMSS1|CMSS1	178	191
gene-FILIP1L|FILIP1L	440	342
gene-TBC1D23|TBC1D23	2156	2299
gene-LNP1|LNP1	48	38
gene-NIT2|NIT2	1138	1104
gene-TOMM70|TOMM70	4317	4530
gene-TFG|TFG	5826	5921
gene-LOC107054896|LOC107054896	161	208
gene-ST3GAL6|ST3GAL6	3885	4214
gene-COL8A1|COL8A1	3250	3375
gene-DCBLD2|DCBLD2	7184	7987
gene-LOC121107113|LOC121107113	0	0
gene-LOC107054902|LOC107054902	0	0
gene-CPOX|CPOX	2022	2144
gene-LOC101747966|LOC101747966	89	77
STRG.3486|LOC107054827	8	16
gene-ABI3BP|ABI3BP	2104	2062
gene-LOC121107753|LOC121107753	4	0
gene-ZPLD1|ZPLD1	15097	16361
gene-TRNAI-AAU-4|TRNAI-AAU	0	0
gene-CBLB|CBLB	843	887
gene-ALCAM|ALCAM	1997	2273
gene-LOC101751371|LOC101751371	139	128
gene-LOC101751304|LOC101751304	218	328
gene-LOC121107751|LOC121107751	23	12
gene-IMPG2|IMPG2	583	708
gene-SENP7|SENP7	1644	1616
gene-FAM172BP|FAM172BP	9	12
gene-TXNL4B|TXNL4B	281	384
gene-TRMT10C|TRMT10C	989	1004
gene-ZBTB11|ZBTB11	3340	3649
gene-NXPE3|NXPE3	2332	2418
gene-NFKBIZ|NFKBIZ	877	820
gene-PCNP|PCNP	5485	5665
gene-RPL24|RPL24	13451	14147
gene-CEP97|CEP97	793	917
gene-LOC124417086|LOC124417086	997	1141
gene-LOC121107184|LOC121107184	20	19
gene-BBX|BBX	3930	4578
gene-LOC101752020|LOC101752020	3	3
gene-LOC124417217|LOC124417217	6	1
gene-LOC124417218|LOC124417218	5	0
gene-LOC124417219|LOC124417219	7	1
gene-LOC124417216|LOC124417216	6	2
gene-LOC124417215|LOC124417215	8	3
gene-LOC124417224|LOC124417224	7	0
gene-LOC124417226|LOC124417226	3	3
gene-LOC124417221|LOC124417221	21	12
gene-LOC124417225|LOC124417225	9	6
gene-CD47|CD47	8391	9397
gene-LOC107055009|LOC107055009	0	0
gene-PLCXD2|PLCXD2	1038	1136
gene-NECTIN3|NECTIN3	3532	3786
gene-HHLA2|HHLA2	2192	2365
gene-MYH15|MYH15	156	142
gene-LOC107054995|LOC107054995	10	8
gene-LOC107049176|LOC107049176	9	12
gene-SH2D1B|SH2D1B	137	179
gene-HJURP|HJURP	91	87
gene-LOC107054998|LOC107054998	0	0
gene-LOC418414|LOC418414	0	0
gene-IFT57|IFT57	2484	2701
gene-LOC121109109|LOC121109109	64	72
gene-KIAA1524|KIAA1524	351	446
gene-LOC121109110|LOC121109110	3	3
gene-TRAT1|TRAT1	194	208
gene-LOC121109303|LOC121109303	32	14
gene-CGGBP1|CGGBP1	1215	1209
gene-CD200|CD200	3075	3422
gene-BTLA|BTLA	41	85
gene-LOC121113377|LOC121113377	0	0
gene-LOC101749285|LOC101749285	10	19
gene-LOC101749311|LOC101749311	80	76
gene-LOC124417273|LOC124417273	0	0
gene-LOC124417272|LOC124417272	2	0
gene-LOC124417271|LOC124417271	3	0
gene-LOC124417268|LOC124417268	0	3
gene-LOC124417270|LOC124417270	3	3
gene-LOC124417274|LOC124417274	3	0
gene-LOC124417275|LOC124417275	4	4
gene-ZNF654|ZNF654	1707	1994
gene-C3orf38|C3orf38	1214	1304
gene-EPHA3|EPHA3	776	820
gene-NSUN3|NSUN3	890	1018
gene-LOC101750283|LOC101750283	13	17
gene-EPHA6|EPHA6	330	394
gene-LOC101750039|LOC101750039	127	103
gene-LOC121107696|LOC121107696	12	22
gene-LOC112532804|LOC112532804	68	47
gene-LOC112530450|LOC112530450	0	0
gene-ARL13B|ARL13B	1577	1894
gene-STX19|STX19	167	178
gene-PROS1|PROS1	9351	9864
gene-GABRR3|GABRR3	43	55
gene-PHLDB2|PHLDB2	7531	7915
gene-MIR7446|MIR7446	0	0
rna-NR_105614.1|MIR7446	0	0
gene-TAGLN3|TAGLN3	544	592
gene-TMPRSS7|TMPRSS7	9998	10808
gene-C1H3ORF52|C1H3ORF52	2342	2635
gene-LOC121110262|LOC121110262	19	26
gene-LOC121110249|LOC121110249	12	18
gene-ABHD10|ABHD10	1521	1755
gene-LOC124417252|LOC124417252	10	5
gene-LOC418421|LOC418421	17149	18517
gene-LOC418423|LOC418423	490	616
gene-LOC770026|LOC770026	35	48
gene-CD200L|CD200L	47	51
gene-ARL6|ARL6	1403	1554
gene-CRYBG3|CRYBG3	6876	7426
gene-MINA|MINA	1022	1135
gene-RCSD1|RCSD1	963	931
gene-DCAF6|DCAF6	4155	4239
gene-LOC121109434|LOC121109434	16	13
gene-MPC2|MPC2	3855	4146
gene-MPZL1|MPZL1	4738	5148
gene-GPA33|GPA33	6	0
gene-CREG1|CREG1	6277	6778
gene-CD247|CD247	479	486
gene-POU2F1|POU2F1	2275	2434
gene-LOC121109436|LOC121109436	0	3
gene-DUSP27|DUSP27	29	18
gene-LOC124417669|LOC124417669	19	11
gene-MAEL|MAEL	19	23
gene-LOC107055053|LOC107055053	0	0
gene-ILDR2|ILDR2	2285	2468
gene-ZFP92|ZFP92	1252	1280
gene-LOC396098|LOC396098	665	726
gene-CD2|CD2	439	392
gene-CD101|CD101	204	177
gene-LOC121109437|LOC121109437	0	4
gene-PTGFRN|PTGFRN	2288	2537
gene-CD88|CD88	403	415
gene-TIMMDC1|TIMMDC1	4256	4329
gene-IGSF3|IGSF3	2753	2943
gene-ADPRH|ADPRH	13665	14030
gene-GJA5|GJA5	335	337
gene-LOC107055079|LOC107055079	36	34
gene-ACP6|ACP6	1705	1885
gene-POU1F1|POU1F1	5	5
gene-LOC124417670|LOC124417670	0	0
gene-GPR89A|GPR89A	1434	1385
gene-PDZK1P1|PDZK1P1	50	63
gene-GJA8|GJA8	44	83
gene-BCL9|BCL9	5795	5413
gene-MIR6616|MIR6616	0	0
rna-NR_105484.1|MIR6616	0	0
gene-POGLUT1|POGLUT1	2224	2664
gene-LOC112530505|LOC112530505	48	39
gene-LOC101752250|LOC101752250	223	210
gene-HTR1F|HTR1F	19	16
gene-CHMP2B|CHMP2B	2735	3243
gene-VGLL3|VGLL3	419	500
gene-LOC121107366|LOC121107366	0	0
gene-LOC121108995|LOC121108995	0	0
gene-LOC112530507|LOC112530507	4	11
gene-LOC101748186|LOC101748186	8	8
gene-MIR1806|MIR1806	0	0
rna-NR_035309.1|MIR1806	0	0
gene-CADM2|CADM2	1823	1968
gene-LOC112530509|LOC112530509	314	259
gene-GBE1|GBE1	1999	2356
gene-LOC107055141|LOC107055141	3	7
gene-LIPI|LIPI	40	72
gene-RBM11|RBM11	192	206
gene-LOC121108993|LOC121108993	10	0
gene-HSPA13|HSPA13	528	645
gene-ABCC13|ABCC13	890	1026
gene-ROBO1|ROBO1	2700	2948
gene-LOC121107710|LOC121107710	8	12
gene-LOC121107709|LOC121107709	0	0
gene-LOC121108368|LOC121108368	37	37
gene-ROBO2|ROBO2	1377	1490
gene-LOC107055143|LOC107055143	0	4
gene-SAMSN1|SAMSN1	302	281
gene-LOC121109038|LOC121109038	0	0
gene-LOC112530514|LOC112530514	19	23
gene-NRIP1|NRIP1	2369	2590
gene-USP25|USP25	3457	3686
gene-TMPRSS15|TMPRSS15	3	4
gene-LOC107055161|LOC107055161	0	3
gene-CHODL|CHODL	16	11
gene-LOC121109215|LOC121109215	14	3
gene-C21orf91|C21orf91	565	614
gene-TSTD1|TSTD1	1738	1893
gene-MIR99A|MIR99A	0	0
rna-NR_031398.1|MIR99A	0	0
gene-MIRLET7C|MIRLET7C	0	0
rna-NR_031399.1|MIRLET7C	0	0
gene-LOC121109513|LOC121109513	104	89
gene-MIR125B2|MIR125B2	4	9
rna-NR_031400.1|MIR125B2	2	2
gene-LOC121106499|LOC121106499	317	307
gene-LOC121110676|LOC121110676	0	0
gene-LOC112530575|LOC112530575	9	0
gene-LOC107055198|LOC107055198	3	0
gene-LOC121109147|LOC121109147	7	0
gene-LOC121109146|LOC121109146	42	52
gene-LOC112530572|LOC112530572	0	2
gene-LOC101748073|LOC101748073	0	0
gene-LOC121109145|LOC121109145	0	0
gene-LOC107051636|LOC107051636	192	177
gene-LOC121109149|LOC121109149	10	4
gene-MIR155HG|MIR155HG	0	3
gene-MIR155|MIR155	0	0
rna-NR_031401.1|MIR155	0	0
gene-NCAM2|NCAM2	652	753
gene-MRPL39|MRPL39	792	855
gene-CYYR1|CYYR1	378	437
gene-LOC124417503|LOC124417503	3	0
gene-ADAMTS1|ADAMTS1	3679	3624
gene-LOC124417328|LOC124417328	24	23
gene-ADAMTS5|ADAMTS5	1105	1225
gene-MAP3K7CL|MAP3K7CL	5	0
gene-LOC107055302|LOC107055302	22	29
gene-LOC121106687|LOC121106687	0	0
gene-LOC107055303|LOC107055303	9	0
gene-BACH1|BACH1	1595	1861
gene-N6AMT1|N6AMT1	1364	1232
gene-LTN1|LTN1	4466	4980
gene-RWDD2B|RWDD2B	374	445
gene-USP16|USP16	1914	2129
gene-CCT8|CCT8	7818	8096
gene-JAM2|JAM2	1304	1243
gene-APP|APP	95443	101834
gene-ATP5J|ATP5J	3338	3186
gene-GABPA|GABPA	3791	4297
gene-MIS18A|MIS18A	681	715
gene-MRAP|MRAP	188	216
gene-LOC107055320|LOC107055320	0	6
gene-LOC107055324|LOC107055324	0	0
gene-HUNK|HUNK	1333	1267
gene-MIR1738|MIR1738	2	0
rna-NR_035236.2|MIR1738	1	0
gene-GRIK1|GRIK1	835	836
gene-LOC427973|LOC427973	724	691
gene-CLDN8|CLDN8	5543	6165
gene-TIAM1|TIAM1	2592	2604
gene-LOC124417197|LOC124417197	4	0
gene-LOC121106689|LOC121106689	5	8
gene-SOD1|SOD1	11910	12649
gene-SCAF4|SCAF4	2235	2377
gene-LOC121106688|LOC121106688	4	2
gene-OLIG2|OLIG2	8	0
gene-PAXBP1|PAXBP1	2967	3181
gene-IL10RB|IL10RB	825	768
gene-LOC121106690|LOC121106690	0	4
gene-URB1|URB1	1522	1704
gene-EVA1C|EVA1C	1808	1928
gene-C21orf59|C21orf59	2411	2694
gene-LOC121106698|LOC121106698	11	10
gene-SYNJ1|SYNJ1	6164	6667
gene-IFNAR2|IFNAR2	2049	2174
gene-IFNAR1|IFNAR1	1012	1272
gene-LOC107055362|LOC107055362	357	304
gene-ATP5O|ATP5O	11811	12810
gene-SLC5A3|SLC5A3	4570	6203
gene-MRPS6|MRPS6	5870	5120
gene-TMEM50B|TMEM50B	5592	6126
gene-DNAJC28|DNAJC28	839	956
gene-GART-B|GART-B	30	43
gene-GART|GART	1733	1956
gene-CRYZL1|CRYZL1	1281	1346
gene-IFNGR2|IFNGR2	5006	5387
gene-SON|SON	19165	20638
gene-DONSON|DONSON	197	183
gene-ITSN1|ITSN1	6950	7673
gene-LOC101748003|LOC101748003	347	379
gene-KCNE2|KCNE2	947	972
gene-MIR3524|MIR3524	0	0
rna-NR_035338.2|MIR3524	0	0
gene-LOC107055374|LOC107055374	0	10
gene-SMIM11|SMIM11	590	634
gene-C21orf140|C21orf140	1	7
gene-KCNE1|KCNE1	13964	14995
gene-RCAN1|RCAN1	6701	7233
gene-LOC101748524|LOC101748524	4	0
gene-LOC121109468|LOC121109468	0	0
gene-LOC121109469|LOC121109469	12	7
gene-RUNX1|RUNX1	834	1103
gene-CLIC6|CLIC6	5693	5792
gene-LOC121109467|LOC121109467	35	36
gene-LOC121107509|LOC121107509	0	0
gene-CLDN14|CLDN14	5	5
gene-SETD4|SETD4	493	470
gene-LOC107055385|LOC107055385	30	13
gene-CHAF1B|CHAF1B	1040	1217
gene-CBR3|CBR3	7275	7787
gene-DOP1B|DOP1B	5538	5966
gene-MIR7452|MIR7452	1	1
rna-NR_105621.1|MIR7452	2	2
gene-MORC4|MORC4	3406	3494
gene-KCNJ6|KCNJ6	12	8
gene-LOC121107521|LOC121107521	186	118
gene-DYRK1A|DYRK1A	2974	3351
gene-KCNJ15|KCNJ15	1756	2137
gene-LOC121107524|LOC121107524	94	120
gene-LOC112530800|LOC112530800	14	24
gene-HLCS|HLCS	2449	2829
gene-LOC121107510|LOC121107510	0	0
gene-RIPPLY3|RIPPLY3	0	8
gene-PIGP|PIGP	519	603
gene-TTC3|TTC3	3663	4232
gene-DSCR3|DSCR3	2040	2486
gene-SIM2|SIM2	38	49
gene-ERG|ERG	401	443
gene-ETS2|ETS2	1569	1620
gene-SH3BGR|SH3BGR	5	13
gene-B3GALT5|B3GALT5	147	101
gene-LOC101750362|LOC101750362	793	1037
gene-IGSF5|IGSF5	1129	1136
gene-LCA5L|LCA5L	355	346
gene-PSMG1|PSMG1	1622	1890
gene-BRWD1|BRWD1	3161	3502
gene-LOC124417521|LOC124417521	68	91
gene-HMGN1|HMGN1	3768	4042
gene-WRB|WRB	1425	1539
gene-FAM3B|FAM3B	522	583
gene-PCP4|PCP4	3535	3965
[truncated: 24,419 more rows]

## Sheet: mm_gene_count_matrix
gene_id	mm1	mm2	mm3
gene-Sox17|Sox17	464	596	978
STRG.5|Gm6123	34	60	17
gene-Gm37323|Gm37323	0	0	0
gene-Gm39586|Gm39586	0	0	0
gene-Gm46082|Gm46082	0	0	0
gene-Gm29874|Gm29874	0	4	0
gene-Gm7369	0	0	0
gene-Mrpl15|Mrpl15	1480	1736	1430
gene-Rp1|Rp1	0	36	100
gene-Gm6101	0	0	0
gene-Xkr4|Xkr4	68	103	960
STRG.10|LOC108167595	1	2	8
gene-Gm46206|Gm46206	12	0	3
gene-Atp6v1h|Atp6v1h	2406	3006	5827
gene-Rgs20|Rgs20	9	13	222
gene-Gm16041|Gm16041	0	0	0
gene-Lypla1|Lypla1	1959	2310	2747
gene-Tcea1|Tcea1	3661	4451	4280
STRG.21|Gm6104	1048	1189	284
gene-Gm37108	0	0	0
gene-Alkal1|Alkal1	0	0	0
gene-Gm7417	0	0	0
STRG.23|Gm2147	4	9	0
gene-Rb1cc1|Rb1cc1	2828	3194	4662
gene-4732440D04Rik|4732440D04Rik	394	259	323
STRG.27|Gm9826	260	365	121
gene-Gm26901|Gm26901	0	0	0
gene-Pcmtd1|Pcmtd1	1924	2367	6360
STRG.31|Gm26983	5	0	0
gene-St18|St18	50	39	2815
STRG.33|Gm7512	12	5	0
gene-Mybl1|Mybl1	183	227	231
gene-Adhfe1|Adhfe1	254	313	236
gene-Vxn|Vxn	0	0	258
gene-Rrs1|Rrs1	2248	2470	1226
gene-2610203C22Rik|2610203C22Rik	14	17	9
gene-Sntg1|Sntg1	8	12	179
gene-Gm6152	0	0	0
gene-Gm7445	0	0	0
STRG.42|Gm15452	304	437	21
STRG.43|Gm7493	14	22	3
gene-Gm39590|Gm39590	74	75	11
STRG.45|Gm51615	1	5	0
gene-Vcpip1|Vcpip1	4344	5156	3535
gene-1700034P13Rik|1700034P13Rik	26	43	28
gene-Gm2352	0	1	0
gene-Mcmdc2|Mcmdc2	429	538	371
gene-Snord87|Snord87	0	0	1
gene-Sgk3|Sgk3	2862	3181	1545
STRG.53|Gm6195	42	52	2
gene-Snhg6|Snhg6	250	260	105
gene-Ppp1r42|Ppp1r42	53	58	27
gene-LOC115487608|LOC115487608	0	0	0
gene-Cspp1|Cspp1	1575	1889	1331
gene-Tcf24|Tcf24	61	55	111
gene-Cops5|Cops5	2972	3627	3268
gene-Arfgef1|Arfgef1	6517	8585	7899
gene-Cpa6|Cpa6	32	29	110
gene-Gm15604	0	0	0
gene-Gm25253|Gm25253	0	0	0
gene-Gm15603	0	0	0
gene-Gm24173|Gm24173	0	0	0
gene-Prex2|Prex2	751	943	4362
gene-Slco5a1|Slco5a1	410	595	1741
gene-Sulf1|Sulf1	2217	2617	6235
gene-A830018L16Rik|A830018L16Rik	0	21	173
gene-Ncoa2|Ncoa2	8183	9373	7918
gene-Gm23169|Gm23169	1	3	0
gene-Gm5523|Gm5523	5	8	3
gene-Lactb2|Lactb2	906	1103	933
gene-Tram1|Tram1	6064	7192	4190
gene-Msc|Msc	20	12	18
gene-Gm9947|Gm9947	8	0	3
STRG.107|Smt3h2-ps4	174	198	150
gene-Trpa1|Trpa1	24	40	61
gene-Eya1|Eya1	1808	2409	5133
gene-Terf1|Terf1	1154	1336	809
gene-Sbspon|Sbspon	235	227	622
gene-Kcnb2|Kcnb2	149	157	1214
gene-Gm51616|Gm51616	0	0	0
gene-Gm51617|Gm51617	0	0	0
gene-Gm25227	0	0	0
STRG.123|Gm10566	732	847	148
gene-Gm51415|Gm51415	17	28	41
gene-4930444P10Rik|4930444P10Rik	7	0	13
gene-Rpl7|Rpl7	30974	35750	21522
gene-Rdh10|Rdh10	648	809	1362
gene-Ube2w|Ube2w	1111	1326	2623
gene-Stau2|Stau2	743	660	3844
gene-Gm7568|Gm7568	0	0	3
gene-C130013N14Rik|C130013N14Rik	0	8	11
gene-Eloc|Eloc	1490	1824	3445
STRG.150|Rbm6-ps1	137	185	55
gene-Tmem70|Tmem70	1066	1311	1936
gene-Ly96|Ly96	82	98	72
gene-Gdap1|Gdap1	268	316	3946
STRG.155|Gm5251	5	8	3
gene-Gm28154|Gm28154	28	19	23
gene-Pi15|Pi15	120	84	44
gene-Crispld1|Crispld1	577	651	702
gene-Gm16070|Gm16070	10	0	0
gene-Jph1|Jph1	425	465	1499
gene-Gm46085|Gm46085	0	0	6
gene-Gm31982|Gm31982	0	0	0
gene-Gm28783|Gm28783	0	0	8
gene-Il17f|Il17f	0	0	3
gene-Gm24723|Gm24723	0	0	0
gene-Mcm3|Mcm3	16152	18214	1478
gene-Paqr8|Paqr8	2547	3230	13528
gene-6720483E21Rik|6720483E21Rik	16	0	24
gene-Gm24171|Gm24171	3	0	0
gene-Gm51618|Gm51618	12	8	7
gene-Efhc1|Efhc1	267	262	374
STRG.173|Gm7094	9	0	0
gene-Khdc1a|Khdc1a	4	10	0
gene-Khdc1c|Khdc1c	4	6	0
gene-Gm4956|Gm4956	0	0	0
gene-Tram2|Tram2	370	512	111
rna-NR_029717.1|Mir30c-2	0	0	0
gene-Mir30c-2|Mir30c-2	1	1	0
gene-Tmem14a|Tmem14a	157	192	559
gene-Gm32947|Gm32947	0	4	4
gene-Gm28836|Gm28836	0	0	0
gene-Gsta3|Gsta3	57	57	98
gene-Ogfrl1|Ogfrl1	2763	3412	5503
gene-Gm19673|Gm19673	0	0	16
gene-Kcnq5|Kcnq5	390	476	618
STRG.184|Gm7658	280	324	306
gene-Gm53062|Gm53062	0	0	0
gene-Sdhaf4|Sdhaf4	314	360	702
gene-Smap1|Smap1	5720	6365	3804
gene-B3gat2|B3gat2	327	433	1216
gene-Rims1|Rims1	70	99	2739
gene-Col9a1|Col9a1	1286	1548	1779
gene-Fam135a|Fam135a	794	925	3420
gene-Gm30756	0	0	0
STRG.197|Gm7846	55	64	50
gene-Gm2914	0	0	0
STRG.198|Gm6473	241	291	88
STRG.199|Gm5525	49	77	12
gene-Col19a1|Col19a1	104	64	212
gene-Gm26418|Gm26418	0	0	0
STRG.202|Tubb4b-ps2	108	143	1
gene-Lmbrd1|Lmbrd1	2746	3327	8285
STRG.207|Gm19680	221	216	196
gene-Ptp4a1|Ptp4a1	971	1120	2860
gene-LOC115487084|LOC115487084	5	0	0
gene-Phf3|Phf3	6433	7601	7104
gene-Gm7256|Gm7256	0	0	0
gene-Adgrb3|Adgrb3	40	48	2955
gene-Gm20172|Gm20172	0	0	0
gene-Gm22260|Gm22260	0	0	0
gene-Gm25294|Gm25294	0	0	0
gene-Gm9884|Gm9884	0	0	0
gene-Gm53060|Gm53060	0	0	5
gene-Gm15455|Gm15455	21	27	15
gene-Gm29228	0	0	0
gene-Prim2|Prim2	2687	2887	526
STRG.226|Gm17813	2	5	0
gene-1700001G17Rik|1700001G17Rik	36	22	25
gene-Gm32229|Gm32229	0	0	10
gene-Rab23|Rab23	745	837	1455
gene-Zfp451|Zfp451	1952	2291	2085
gene-Bag2|Bag2	1433	1811	742
gene-n-TEttc1|n-TEttc1	0	0	0
gene-Mir5103|Mir5103	4	12	0
rna-NR_039562.1|Mir5103	1	1	0
gene-Ccdc115|Ccdc115	1324	1559	1265
gene-Imp4|Imp4	3019	3503	1547
gene-Amer3|Amer3	44	60	1689
gene-4930568A12Rik|4930568A12Rik	5	16	1
gene-Prss39|Prss39	3	0	6
gene-Gm32504|Gm32504	67	93	21
gene-Ptpn18|Ptpn18	2166	2398	539
gene-Gm32566|Gm32566	82	95	8
gene-Bend6|Bend6	384	447	6355
gene-Gm38471|Gm38471	0	4	9
gene-Dst|Dst	14126	15887	46706
gene-Gm23792	0	0	0
gene-Mir6896|Mir6896	0	0	0
rna-NR_105861.1|Mir6896	0	0	0
gene-Gm51742|Gm51742	5	5	0
gene-Gm26788|Gm26788	2	16	4
gene-Gm39624|Gm39624	0	0	0
gene-Arhgef4|Arhgef4	1115	1189	4443
gene-Gm32920|Gm32920	0	0	0
gene-Gm51813	0	0	5
gene-Gm32790|Gm32790	28	12	34
gene-Plekhb2|Plekhb2	3871	4857	14549
gene-Fam168b|Fam168b	17195	19985	20759
gene-Gm39625|Gm39625	0	0	0
gene-Neurl3|Neurl3	3459	3866	360
gene-Hs6st1|Hs6st1	10325	11951	5864
gene-Gm33280|Gm33280	578	801	57
gene-Uggt1|Uggt1	8366	9939	5948
gene-Mir6897|Mir6897	2	0	1
rna-NR_105862.1|Mir6897	2	0	2
gene-Arid5a|Arid5a	4186	4962	1641
gene-Kansl3|Kansl3	7287	8320	10069
gene-Mir6898|Mir6898	3	0	0
rna-NR_105863.1|Mir6898	2	0	0
gene-Gm33401|Gm33401	0	0	0
gene-Fer1l5|Fer1l5	0	23	15
gene-Lman2l|Lman2l	4692	5235	6618
gene-Gm33454|Gm33454	36	36	11
gene-Cnnm4|Cnnm4	1380	1642	1844
gene-Cnnm3|Cnnm3	2929	3448	3794
gene-Ankrd23|Ankrd23	2845	3377	2824
gene-Ankrd39|Ankrd39	740	895	996
gene-Sema4c|Sema4c	3142	3706	6017
gene-Fam178b|Fam178b	635	725	1978
gene-Cox5b|Cox5b	6446	7061	9375
gene-Zap70|Zap70	359	355	44
gene-Gm33533|Gm33533	0	0	12
gene-4933424G06Rik|4933424G06Rik	0	0	0
gene-Actr1b|Actr1b	6871	7476	13606
STRG.338|Rpl12-ps1	3	0	2
gene-Vwa3b|Vwa3b	69	57	176
gene-Gm39626|Gm39626	0	0	0
gene-Gm37020|Gm37020	0	0	0
gene-Tmem131|Tmem131	11932	14004	6138
gene-Cracdl|Cracdl	1174	1330	3838
gene-4930470B04Rik|4930470B04Rik	0	0	4
gene-Gm39628|Gm39628	0	0	4
gene-4930556I23Rik|4930556I23Rik	13	0	27
gene-Tsga10|Tsga10	285	342	373
gene-Lyg2|Lyg2	8	0	0
gene-Lipt1|Lipt1	176	192	241
gene-Mitd1|Mitd1	582	716	371
gene-Mrpl30|Mrpl30	1979	2185	1976
gene-Txndc9|Txndc9	2003	2401	2653
gene-4930439A04Rik|4930439A04Rik	11	0	0
gene-Unc50|Unc50	1986	2643	2973
gene-Mgat4a|Mgat4a	1608	1984	2826
gene-Inpp4a|Inpp4a	4811	5735	9519
gene-Coa5|Coa5	6035	7544	6064
gene-4930594C11Rik|4930594C11Rik	17	25	0
gene-Gm39627|Gm39627	5	5	0
gene-Gm34448|Gm34448	0	0	10
gene-Rev1|Rev1	2714	3385	2662
gene-Eif5b|Eif5b	4038	4889	4731
gene-Lonrf2|Lonrf2	520	576	5463
gene-Chst10|Chst10	1499	1780	2168
gene-Gm51581|Gm51581	6	26	10
gene-Gm35222|Gm35222	0	0	0
gene-Pdcl3|Pdcl3	2243	2664	2287
gene-Npas2|Npas2	688	934	387
gene-Gm3617	0	5	0
gene-Aff3|Aff3	4503	5329	3575
gene-Gm16150|Gm16150	228	297	50
gene-Gm34596|Gm34596	47	78	4
gene-Cnot11|Cnot11	1911	2306	2283
gene-Creg2|Creg2	128	168	782
gene-D930019O06Rik|D930019O06Rik	9	16	34
gene-Snord89|Snord89	28	30	28
gene-Rnf149|Rnf149	2987	3346	5714
gene-LOC115485772|LOC115485772	1	1	0
gene-Rfx8|Rfx8	0	0	26
gene-Tbc1d8|Tbc1d8	4810	5122	2947
gene-Rpl31|Rpl31	21258	24571	11209
gene-Il1rl2|Il1rl2	565	611	126
STRG.436|Gm17970	12	18	3
gene-Il1r1|Il1r1	1151	1227	308
gene-Il1rl1|Il1rl1	1397	1674	95
gene-Il18r1|Il18r1	389	482	138
gene-Gm35801|Gm35801	0	0	0
gene-Slc9a4|Slc9a4	79	73	331
gene-Il18rap|Il18rap	2849	3309	289
gene-Slc9a2|Slc9a2	854	1007	1941
gene-Gm37915|Gm37915	156	219	0
gene-Mfsd9|Mfsd9	398	586	251
gene-Map4k4|Map4k4	14599	16920	19414
gene-Il1r2|Il1r2	773	839	66
gene-Gm16894|Gm16894	39	33	17
gene-Tmem182|Tmem182	385	472	384
gene-Dalir|Dalir	8	4	5
gene-Gm30248|Gm30248	0	20	32
gene-Gm28175|Gm28175	12	0	4
gene-Gm46091|Gm46091	57	52	114
gene-Pantr1|Pantr1	207	302	1068
gene-Pou3f3|Pou3f3	2666	3518	7240
gene-2900092D14Rik|2900092D14Rik	70	84	354
gene-Pantr2|Pantr2	22	37	46
gene-Gm23126|Gm23126	0	0	2
gene-Mrps9|Mrps9	1373	1583	1723
gene-Gpr45|Gpr45	0	0	53
gene-Gm3418	0	0	0
gene-Tgfbrap1|Tgfbrap1	3798	4427	4285
gene-Gm28782|Gm28782	20	38	11
gene-8430432A02Rik|8430432A02Rik	9	29	49
gene-AI597479|AI597479	1242	1359	2203
gene-Fhl2|Fhl2	924	1050	823
STRG.510|Gm8210	590	689	4260
gene-Gm30634|Gm30634	0	0	0
gene-Gm38628|Gm38628	8	0	0
gene-Ecrg4|Ecrg4	591	696	1115
gene-Nck2|Nck2	1797	2133	3039
STRG.514|Gm19587	4	26	18
gene-Uxs1|Uxs1	1153	1237	2361
STRG.520|Gm16103	3	4	7
gene-Bivm|Bivm	351	509	1117
gene-Poglut2|Poglut2	1097	1286	903
gene-Ercc5|Ercc5	1197	1523	1886
gene-Mettl21c|Mettl21c	0	0	0
gene-Gm8251|Gm8251	120	127	20
gene-Tex30|Tex30	578	689	269
gene-Tpp2|Tpp2	3171	4356	3210
gene-Gm39635|Gm39635	0	0	0
gene-Gulp1|Gulp1	365	447	1267
gene-Gm16102	0	0	0
gene-4930521E06Rik|4930521E06Rik	0	0	0
gene-Gm39637|Gm39637	1	1	1
gene-Gm23216|Gm23216	0	0	0
gene-Gm30900|Gm30900	0	0	0
gene-Wdr75|Wdr75	1712	1981	1413
STRG.541|Gm5526	534	621	2848
gene-Col3a1|Col3a1	15682	18045	5523
gene-Col5a2|Col5a2	35804	40852	3383
STRG.544|Gm3852	3	0	0
gene-Slc40a1|Slc40a1	8853	10217	758
gene-Dnah7b|Dnah7b	184	222	373
gene-Gm31046|Gm31046	0	0	0
STRG.550|Gm4852	16	9	14
STRG.551|Gm8337	5	5	9
gene-Tmeff2|Tmeff2	410	511	2081
gene-9330175M20Rik|9330175M20Rik	0	0	4
gene-Cavin2|Cavin2	5300	6094	2646
gene-Gm17767|Gm17767	0	0	0
gene-Nabp1|Nabp1	1075	1327	1150
gene-Dnah7c|Dnah7c	67	52	101
gene-Slc39a10|Slc39a10	1956	2459	4197
gene-Stat4|Stat4	630	888	57
gene-Gm3940	0	0	1
gene-Gm31812|Gm31812	10	13	25
gene-Myo1b|Myo1b	3324	3731	1623
gene-Stat1|Stat1	9333	10665	3296
gene-Gls|Gls	4732	5706	14291
STRG.583|Rps27a-ps1	32	4	1
STRG.584|Gm5976	101	94	24
gene-Gm553|Gm553	28	10	12
gene-Nab1|Nab1	2321	2802	3257
gene-Inpp1|Inpp1	1551	1774	2747
gene-Nemp2|Nemp2	1137	1504	526
gene-Gm28178|Gm28178	0	0	4
STRG.593|Gm5527	496	516	164
gene-Mfsd6|Mfsd6	2416	2926	5332
gene-Mstn|Mstn	60	76	176
gene-1700019A02Rik|1700019A02Rik	0	0	8
gene-Hibch|Hibch	1060	1255	1225
gene-1700019D03Rik|1700019D03Rik	81	83	616
gene-Osgepl1|Osgepl1	573	732	643
gene-Gm18800	0	5	0
gene-Pms1|Pms1	382	426	391
gene-Ormdl1|Ormdl1	1138	1439	1116
gene-Asnsd1|Asnsd1	2816	3053	1732
gene-Asdurf|Asdurf	1	2	1
gene-Gtf3c3|Gtf3c3	993	1103	1654
gene-Gm51622|Gm51622	0	0	0
gene-Gm25829|Gm25829	0	0	0
gene-Ccdc150|Ccdc150	134	121	107
gene-Gm51623|Gm51623	0	0	0
gene-Pgap1|Pgap1	603	755	1387
gene-Dnah7a|Dnah7a	35	46	187
gene-Gm32311|Gm32311	31	18	0
gene-Stk17b|Stk17b	5336	6764	2939
gene-Hecw2|Hecw2	518	632	1805
gene-Mir7681|Mir7681	0	1	0
rna-NR_106149.1|Mir7681	0	1	0
gene-Gm24251	0	0	0
gene-Ankrd44|Ankrd44	7202	8448	2536
gene-4930444A19Rik|4930444A19Rik	0	0	0
gene-Coq10b|Coq10b	654	655	1786
STRG.633|Gm17971	64	68	32
gene-Sf3b1|Sf3b1	26367	31636	22741
STRG.638|Gm6822	13	42	8
gene-Hspd1|Hspd1	9137	10389	9534
gene-Hspe1|Hspe1	3119	3548	3022
gene-Mob4|Mob4	1197	1622	2650
gene-Rftn2|Rftn2	1252	1480	2764
gene-Gm51743|Gm51743	0	0	0
gene-Gm10561|Gm10561	31	96	140
gene-Gm32949|Gm32949	12	20	10
gene-Boll|Boll	92	85	173
gene-Mars2|Mars2	769	1004	461
STRG.653|Gm8292	134	161	90
gene-9130227L01Rik|9130227L01Rik	0	0	7
gene-Gm39642|Gm39642	5	0	0
gene-Plcl1|Plcl1	359	375	1115
gene-Gm6644|Gm6644	121	177	667
gene-Gm38484|Gm38484	56	120	7
gene-BC055402|BC055402	1489	1688	85
gene-Satb2|Satb2	6172	6643	324
gene-Gm51624|Gm51624	0	0	0
gene-9130024F11Rik|9130024F11Rik	226	554	65
gene-1700066M21Rik|1700066M21Rik	966	1269	718
gene-4930558J18Rik|4930558J18Rik	84	97	12
gene-Tyw5|Tyw5	310	328	430
gene-Maip1|Maip1	718	897	1061
gene-Kctd18|Kctd18	716	971	654
gene-Spats2l|Spats2l	642	658	1513
gene-LOC115487684|LOC115487684	0	0	0
gene-Sgo2a|Sgo2a	1445	1696	152
gene-Aox4|Aox4	80	53	104
gene-Gm39643|Gm39643	0	0	0
gene-Aox3|Aox3	290	388	365
gene-Gm24548	0	0	0
gene-Aox1|Aox1	531	692	1285
gene-Ppil3|Ppil3	645	711	595
gene-Nif3l1|Nif3l1	1181	1367	1397
gene-Orc2|Orc2	2706	3202	1569
gene-Gm23966|Gm23966	3	5	3
STRG.704|Cbx3-ps7	168	191	77
gene-Gm20257|Gm20257	106	147	88
gene-Aox2|Aox2	58	51	204
gene-Gm15759|Gm15759	0	0	0
gene-Bzw1|Bzw1	7853	9794	10310
gene-Gm39644|Gm39644	13	9	18
gene-Clk1|Clk1	7920	8790	8159
gene-Flacc1|Flacc1	0	0	9
gene-Gm15834|Gm15834	143	209	131
gene-Fam126b|Fam126b	882	1073	3242
gene-Ndufb3|Ndufb3	2287	2467	2906
gene-Gm39646|Gm39646	14	19	7
gene-Cflar|Cflar	5467	6643	5239
gene-Tmem237|Tmem237	358	365	887
gene-Gm33724|Gm33724	67	49	7
gene-Cdk15|Cdk15	107	103	432
gene-Gm51625|Gm51625	0	9	4
gene-Mpp4|Mpp4	23	0	202
gene-Gm33667|Gm33667	0	0	2
gene-Als2|Als2	2020	2521	10228
gene-Fzd7|Fzd7	2203	2538	5335
gene-Gm973|Gm973	194	232	638
gene-Gm28411|Gm28411	11	0	4
gene-Gm39648|Gm39648	0	18	17
gene-Gm33833|Gm33833	0	0	0
gene-Sumo1|Sumo1	2152	2844	3826
gene-Snord70|Snord70	0	2	0
gene-Snord11|Snord11	0	0	0
gene-Nop58|Nop58	2463	2622	1282
gene-LOC115485825|LOC115485825	1	6	2
gene-Gm26287|Gm26287	9	2	0
gene-Gm28802|Gm28802	0	0	0
gene-Trak2|Trak2	25372	29603	12820
gene-Casp8|Casp8	2397	2880	706
gene-Stradb|Stradb	4238	5056	1424
gene-Bmpr2|Bmpr2	2958	3428	7766
gene-Fam117b|Fam117b	2273	2922	3440
gene-Ica1l|Ica1l	107	170	892
gene-Wdr12|Wdr12	1482	1662	1875
gene-Carf|Carf	313	404	471
gene-Gm15464	0	0	4
gene-Cyp20a1|Cyp20a1	1004	1126	1163
gene-Nbeal1|Nbeal1	1587	1802	3834
gene-Gm29332	0	0	7
gene-Gm11578|Gm11578	6	6	59
STRG.792|Eif4a-ps4	4401	4586	2730
gene-Abi2|Abi2	1033	1401	2454
gene-Raph1|Raph1	2548	2667	3531
STRG.805|Gm11575	8	16	8
gene-Cd28|Cd28	59	42	22
STRG.807|Rpl18-ps1	10	23	7
gene-Ctla4|Ctla4	5	9	4
gene-9530026F06Rik|9530026F06Rik	0	0	5
gene-Gm38137|Gm38137	0	0	0
gene-Gm39650|Gm39650	0	0	0
gene-Icos|Icos	26	23	6
STRG.811|Gm11599	383	434	0
gene-Pard3b|Pard3b	1300	1466	1142
gene-Pard3bos1|Pard3bos1	0	0	0
gene-Pard3bos2|Pard3bos2	0	0	0
gene-Gm34881|Gm34881	0	0	10
gene-Nrp2|Nrp2	13963	16616	4714
gene-Gm29083|Gm29083	38	36	41
gene-4930487H11Rik|4930487H11Rik	43	73	0
STRG.821|Gm11605	657	923	136
gene-Gm39653|Gm39653	5	0	9
gene-Mdh1b|Mdh1b	16	0	100
gene-Dytn|Dytn	48	75	167
gene-Gm13749|Gm13749	8	20	8
gene-4933402D24Rik|4933402D24Rik	0	28	39
gene-Fastkd2|Fastkd2	704	761	954
gene-Adam23|Adam23	1151	1419	8866
gene-Gm22281|Gm22281	1	0	2
gene-Klf7|Klf7	2627	3114	2795
gene-Mir6899|Mir6899	0	0	0
rna-NR_105864.1|Mir6899	0	0	0
gene-Gm35880|Gm35880	0	0	1
gene-Gm13750	0	0	0
gene-Gm13748|Gm13748	40	31	18
gene-Gm38513|Gm38513	0	0	0
gene-Gm44468	0	0	0
gene-Gm24942	0	0	0
gene-Ndufs1|Ndufs1	5566	6499	9970
gene-Gpr1|Gpr1	12	0	0
gene-Zdbf2|Zdbf2	68	80	599
gene-1700039I01Rik|1700039I01Rik	0	0	0
gene-Gm11608|Gm11608	0	0	3
gene-Gm23448|Gm23448	0	0	0
gene-Ino80d|Ino80d	5291	6233	3796
STRG.841|Rps27-ps1	3	4	0
gene-Ino80dos|Ino80dos	169	191	165
gene-Eef1b2|Eef1b2	15163	16798	9717
gene-Gm26457|Gm26457	10	10	4
gene-Snora41|Snora41	14	36	16
gene-Creb1|Creb1	4169	5222	4375
gene-Mettl21a|Mettl21a	641	736	1046
gene-Gm29152|Gm29152	0	0	0
gene-Ccnyl1|Ccnyl1	825	908	1244
gene-2810408I11Rik|2810408I11Rik	159	175	39
gene-Fzd5|Fzd5	2619	2928	484
gene-Gm51628|Gm51628	0	0	0
gene-Plekhm3|Plekhm3	2736	2912	3662
gene-Gm51627|Gm51627	18	18	13
STRG.877|Rpl10a-ps1	6018	7219	5114
gene-Cryga|Cryga	0	0	0
gene-D630023F18Rik|D630023F18Rik	70	61	217
gene-Gm36358|Gm36358	18	25	38
gene-Pth2r|Pth2r	0	0	14
gene-Pikfyve|Pikfyve	2774	3210	4759
gene-Idh1|Idh1	2919	3567	2630
gene-Map2|Map2	1514	1705	2572
gene-Gm51629|Gm51629	0	0	0
gene-Gm24729|Gm24729	0	0	0
gene-Gm25411	0	0	0
gene-Unc80|Unc80	738	981	5789
gene-Gm39655|Gm39655	0	0	0
gene-Rpe|Rpe	777	1322	648
gene-Kansl1l|Kansl1l	1275	1588	381
gene-Gm46093|Gm46093	580	733	29
gene-Acadl|Acadl	3477	3992	935
STRG.937|Gm15793	34	60	2
gene-Gm27934|Gm27934	4	0	0
STRG.939|Rpl31-ps14	15	11	0
gene-Myl1|Myl1	3645	3807	2097
gene-Gm28497|Gm28497	0	0	0
gene-Lancl1|Lancl1	1987	2141	1402
gene-LOC115487097|LOC115487097	68	63	8
gene-Ikzf2|Ikzf2	457	583	585
gene-Bard1|Bard1	2169	2835	163
gene-Abca12|Abca12	0	0	8
gene-Gm39659|Gm39659	0	0	0
gene-Spag16|Spag16	32	45	152
gene-Gm23879|Gm23879	0	0	0
gene-Gm23422|Gm23422	0	0	0
gene-LOC115487661|LOC115487661	0	0	0
gene-Erbb4|Erbb4	70	130	285
gene-Gm25542	0	0	0
gene-Gm51744|Gm51744	0	0	0
gene-Gm39660|Gm39660	0	0	0
gene-Gm30160|Gm30160	0	17	3
STRG.960|Gm5256	6	0	0
gene-Mreg|Mreg	199	187	982
gene-Tmem169|Tmem169	29	66	332
gene-Gm51631|Gm51631	0	0	0
gene-Gm24497|Gm24497	0	5	2
gene-Pecr|Pecr	329	392	314
gene-D230017M19Rik|D230017M19Rik	48	129	186
gene-Gm25939|Gm25939	4	0	2
gene-Xrcc5|Xrcc5	818	932	1430
gene-Marchf4|Marchf4	16	40	839
gene-Smarcal1|Smarcal1	2597	3115	4491
STRG.970|Gm15843	4	0	0
gene-Gm51632|Gm51632	0	0	0
gene-Gm39663|Gm39663	8	0	0
gene-Rpl37a|Rpl37a	10288	17512	8858
gene-Apol7d|Apol7d	0	0	0
gene-Atic|Atic	5287	6052	3096
gene-Fn1|Fn1	50563	59622	9123
gene-Gm31047|Gm31047	21	20	20
gene-C530043A13Rik|C530043A13Rik	6	19	28
gene-Gm29183|Gm29183	260	284	33
gene-Mir6351|Mir6351	0	0	0
rna-NR_105769.1|Mir6351	0	0	0
gene-6030407O03Rik|6030407O03Rik	14	21	44
gene-Gm30788|Gm30788	0	0	0
gene-Gm30847|Gm30847	0	0	0
gene-Igfbp2|Igfbp2	3174	3913	7099
gene-Igfbp5|Igfbp5	49749	57233	62381
gene-Cxcr1|Cxcr1	41	39	4
gene-Tns1|Tns1	20423	23572	46056
gene-Gm39664|Gm39664	0	7	3
gene-Rufy4|Rufy4	884	973	1448
gene-Gm31637|Gm31637	7	8	0
gene-Cxcr2|Cxcr2	5685	6428	195
gene-Catip|Catip	127	119	391
gene-Slc11a1|Slc11a1	2379	2815	270
gene-Arpc2|Arpc2	14051	15997	8396
gene-Aamp|Aamp	8608	9829	12997
gene-Pnkd|Pnkd	2183	2601	8277
gene-Gpbar1|Gpbar1	9	3	0
gene-Gm28364|Gm28364	163	163	62
gene-Tmbim1|Tmbim1	4430	5204	9395
gene-Ctdsp1|Ctdsp1	9302	10691	7998
gene-Mir26b|Mir26b	4	8	1
rna-NR_029743.1|Mir26b	2	2	0
gene-Ttll4|Ttll4	3628	3893	2887
gene-Gm32099|Gm32099	0	0	17
gene-Wnt10a|Wnt10a	124	137	23
gene-Gm32275|Gm32275	12	36	32
gene-Gm16582|Gm16582	0	0	0
gene-Cdk5r2|Cdk5r2	119	109	2650
gene-Ihh|Ihh	157	252	31
gene-Prkag3|Prkag3	36	52	58
gene-Wnt6|Wnt6	179	229	758
gene-Gm29539|Gm29539	0	12	12
gene-Cyp27a1|Cyp27a1	1156	1340	1344
gene-Cfap65|Cfap65	569	625	900
gene-Nhej1|Nhej1	252	275	156
gene-Usp37|Usp37	1834	2134	1676
gene-Plcd4|Plcd4	383	414	1858
gene-Zfp142|Zfp142	3156	3796	3169
gene-Rnf25|Rnf25	1828	2119	2000
gene-Vil1|Vil1	20	0	41
gene-Cnot9|Cnot9	3780	4677	2226
gene-Bcs1l|Bcs1l	928	1177	889
gene-Stk36|Stk36	314	419	651
gene-Resp18|Resp18	191	247	1042
gene-Dnpep|Dnpep	2755	3499	2552
gene-Gm15179|Gm15179	0	0	15
gene-Des|Des	2756	2952	1912
gene-Slc23a3|Slc23a3	45	83	52
gene-Atg9a|Atg9a	8679	9858	7751
gene-Ankzf1|Ankzf1	1756	2264	1680
gene-Glb1l|Glb1l	1859	1728	1336
gene-A630095N17Rik|A630095N17Rik	4	0	0
gene-Dnajb2|Dnajb2	7908	9315	8711
gene-Ptprn|Ptprn	369	439	4015
gene-Cnppd1|Cnppd1	6082	6842	3188
gene-Retreg2|Retreg2	8256	10093	11817
gene-Zfand2b|Zfand2b	2036	2369	1260
gene-Abcb6|Abcb6	5695	6472	1436
gene-Stk16|Stk16	7458	8057	4387
gene-Tuba4a|Tuba4a	39346	47710	24620
gene-Obsl1|Obsl1	2577	3343	3327
gene-Inha|Inha	531	669	1681
gene-Speg|Speg	2602	2933	5548
gene-Gmppa|Gmppa	2693	2879	3094
gene-Asic4|Asic4	0	0	30
gene-Gm32506|Gm32506	0	0	0
gene-Chpf|Chpf	2351	3003	6072
gene-Tmem198|Tmem198	184	181	1141
STRG.1184|Tfdp1-ps	76	88	0
gene-Gm2102|Gm2102	52	40	438
gene-Gm15183	0	0	0
gene-Slc4a3|Slc4a3	1556	1839	5723
gene-Stk11ip|Stk11ip	3284	3748	1833
gene-Pax3|Pax3	54	44	301
gene-Epha4|Epha4	492	635	2093
gene-Mir6352|Mir6352	0	0	0
rna-NR_105770.1|Mir6352	0	0	0
gene-Mogat1|Mogat1	0	0	20
gene-Gm39665|Gm39665	0	8	0
gene-Scg2|Scg2	28	32	1776
gene-Ap1s3|Ap1s3	412	469	375
gene-Acsl3|Acsl3	2808	3436	16689
gene-Utp14b|Utp14b	294	344	255
gene-Gm51635|Gm51635	4	5	35
gene-Sgpp2|Sgpp2	649	753	6011
gene-Gm51634|Gm51634	0	0	0
gene-Farsb|Farsb	1673	2136	1933
gene-Gm29536|Gm29536	0	0	0
gene-LOC115487654|LOC115487654	0	0	0
gene-Kcne4|Kcne4	120	150	232
STRG.1213|Gm5830	66	58	21
gene-Gm39666|Gm39666	6	0	0
gene-Wdfy1|Wdfy1	2183	2178	4758
gene-Mrpl44|Mrpl44	1315	1582	1207
STRG.1221|Gm5529	142	178	115
STRG.1222|Gm28071	64	89	4
gene-Gm33970|Gm33970	10	15	0
gene-Fam124b|Fam124b	0	13	4
gene-LOC108167342|LOC108167342	0	0	0
gene-2310015K22Rik|2310015K22Rik	0	0	0
gene-Serpine2|Serpine2	14101	16925	12627
gene-Gm39667|Gm39667	33	28	12
gene-Cul3|Cul3	4742	5442	7342
gene-Nyap2|Nyap2	69	118	414
gene-Irs1|Irs1	3467	4463	3169
gene-Rhbdd1|Rhbdd1	1554	1879	1677
gene-Gm46095|Gm46095	0	16	23
gene-Gm19257	0	0	0
gene-Gm34286|Gm34286	0	0	0
gene-Tm4sf20|Tm4sf20	0	0	20
gene-Gm34450|Gm34450	0	0	0
gene-Dock10|Dock10	6528	7706	2634
gene-Slc19a3|Slc19a3	53	52	152
gene-Col4a4|Col4a4	583	713	1392
gene-Col4a3|Col4a3	440	503	926
gene-C430014B12Rik|C430014B12Rik	20	13	21
gene-Mff|Mff	3910	4799	7696
gene-Gm39668|Gm39668	234	328	349
gene-Agfg1|Agfg1	4936	5643	5410
gene-Sphkap|Sphkap	580	732	19906
STRG.1291|Gm6374	5	21	10
STRG.1292|Gm51636	381	438	10
gene-Pid1|Pid1	1852	2237	4162
gene-Gm18304	0	0	0
gene-Mir6353|Mir6353	0	0	0
rna-NR_105771.1|Mir6353	0	0	0
gene-Gm39669|Gm39669	0	0	0
gene-Slc16a14|Slc16a14	45	40	138
STRG.1298|Rpl19-ps1	62	50	58
gene-A630001G21Rik|A630001G21Rik	2172	2221	11
gene-Mir5126|Mir5126	0	0	0
rna-NR_039588.1|Mir5126	0	0	0
gene-Gm51637|Gm51637	0	0	0
gene-Trip12|Trip12	15001	18905	14044
gene-Dner|Dner	2142	2700	18123
gene-Fbxo36|Fbxo36	115	130	218
gene-A530032D15Rik|A530032D15Rik	63	96	0
gene-Gm38510|Gm38510	25	25	13
gene-Gm7609|Gm7609	61	64	25
gene-C130026I21Rik|C130026I21Rik	118	87	44
gene-Gm7592|Gm7592	68	105	49
gene-Sp110|Sp110	2995	3596	170
gene-Sp140|Sp140	1985	2090	221
gene-Sp100|Sp100	8230	9432	800
STRG.1328|Gm7582	19	28	32
gene-A530040E14Rik|A530040E14Rik	261	228	5
gene-Gm2619|Gm2619	291	264	6
gene-Gm2427|Gm2427	120	124	115
gene-4933407L21Rik|4933407L21Rik	0	8	0
gene-2810459M11Rik|2810459M11Rik	24	32	151
gene-Gpr55|Gpr55	60	135	14
gene-Gm41905|Gm41905	0	0	0
gene-Cab39|Cab39	6838	8239	10286
gene-Itm2c|Itm2c	11539	14628	35298
gene-Gm28626|Gm28626	3	0	2
gene-B3gnt7|B3gnt7	644	652	642
gene-Htr2b|Htr2b	48	49	49
gene-Psmd1|Psmd1	7625	8590	8234
gene-Gm22786|Gm22786	4	0	0
gene-Armc9|Armc9	1285	1612	1147
gene-Gm16341|Gm16341	16	62	0
gene-Gm46098|Gm46098	44	43	7
gene-Gm5258	0	0	0
rna-NR_106184.1|Gm24148	0	1	1
gene-Nmur1|Nmur1	13	0	37
gene-Tex44|Tex44	0	4	0
gene-Gm32700|Gm32700	0	0	0
gene-Ncl|Ncl	23355	25575	17649
gene-Snora75|Snora75	25	28	6
gene-Gm24148|Gm24148	2	4	1
gene-Snord82|Snord82	4	0	0
gene-C130036L24Rik|C130036L24Rik	88	75	23
gene-Nppc|Nppc	16	9	40
gene-Gm41910|Gm41910	2	0	7
gene-Gm32758|Gm32758	0	9	0
gene-Gm41907|Gm41907	0	0	7
gene-Rpl30-ps6	0	5	0
gene-Ptma|Ptma	85491	98470	21635
gene-Pde6d|Pde6d	1857	2002	2893
gene-Cops7b|Cops7b	1738	2193	1545
gene-Prss56|Prss56	8	0	155
gene-Ecel1|Ecel1	52	74	16
gene-Gm51638|Gm51638	0	0	0
gene-Gm33292|Gm33292	0	0	0
gene-Chrng|Chrng	8	0	14
gene-Chrnd|Chrnd	80	56	69
gene-Eif4e2|Eif4e2	4130	4668	3619
gene-Gm41911|Gm41911	0	0	7
gene-Efhd1|Efhd1	1557	1733	5721
gene-Dis3l2|Dis3l2	1297	1535	1502
STRG.1431|Gm6136	2855	3271	917
gene-Gm41909|Gm41909	4	0	0
gene-Snorc|Snorc	41	50	19
gene-Neu2|Neu2	52	85	89
gene-Ngef|Ngef	372	502	422
gene-Gm46099|Gm46099	0	0	0
STRG.1437|Gm6153	12	5	3
gene-Gigyf2|Gigyf2	6020	6668	5658
gene-Gm22549|Gm22549	0	0	0
gene-Kcnj13|Kcnj13	181	209	620
gene-Atg16l1|Atg16l1	2751	3292	2931
gene-Gm25395|Gm25395	3	2	0
gene-Scarna6|Scarna6	26	9	11
gene-Inpp5d|Inpp5d	12774	14820	1178
gene-Gm33517|Gm33517	1	6	0
gene-Gm33470|Gm33470	12	7	0
gene-Sag|Sag	108	168	51
gene-Usp40|Usp40	1708	1918	2254
gene-Dgkd|Dgkd	17652	20987	12209
gene-Gm19582|Gm19582	37	39	71
gene-Gm29538|Gm29538	8	0	30
gene-Gm28888|Gm28888	0	0	13
gene-Glrp1|Glrp1	68	59	15
gene-Trpm8|Trpm8	17	0	90
gene-Gm51639|Gm51639	0	0	0
gene-Arl4c|Arl4c	1778	2400	6164
gene-Gm34194|Gm34194	0	0	29
gene-1700067G17Rik|1700067G17Rik	0	0	0
STRG.1485|Gm5259	4	0	0
gene-Sh3bp4|Sh3bp4	1627	2264	3038
gene-Gm34331|Gm34331	0	0	0
gene-Gm38421	0	0	0
gene-Ugt1a10|Ugt1a10	0	0	0
gene-Ugt1a9|Ugt1a9	0	0	0
gene-Ugt1a8|Ugt1a8	0	0	0
gene-Gm15372	0	0	0
gene-Ugt1a5|Ugt1a5	0	0	0
gene-Ugt1a2|Ugt1a2	0	0	4
gene-Ugt1a1|Ugt1a1	0	20	0
gene-Mroh2a|Mroh2a	41	47	11
gene-Hjurp|Hjurp	22479	26456	2565
gene-Ugt1a7c|Ugt1a7c	1350	1604	171
gene-Ugt1a6b|Ugt1a6b	7	17	144
gene-Ugt1a6a|Ugt1a6a	26	53	100
gene-Dnajb3|Dnajb3	229	289	53
gene-Gbx2|Gbx2	189	208	69
gene-LOC102637806|LOC102637806	23	38	14
gene-Asb18|Asb18	20	25	29
gene-Gm41915|Gm41915	0	0	0
gene-Gm34616|Gm34616	0	0	0
gene-Iqca|Iqca	36	85	184
gene-2700003A03Rik|2700003A03Rik	30	39	9
gene-Gm34930|Gm34930	106	96	14
gene-Ackr3|Ackr3	3208	3768	3019
gene-Gm34992|Gm34992	0	0	0
gene-Gm35242|Gm35242	0	0	0
gene-Gm41914|Gm41914	463	502	64
gene-Agap1|Agap1	5116	5611	9691
gene-4933400F21Rik|4933400F21Rik	4	3	4
gene-Cops8|Cops8	3271	3747	4861
gene-Gm35381|Gm35381	0	0	0
gene-Prlh|Prlh	0	0	0
gene-Rab17|Rab17	116	109	631
gene-Mlph|Mlph	157	137	585
gene-Col6a3|Col6a3	6338	7380	1478
STRG.1520|Gm7776	17	9	0
gene-Gm35443	0	0	0
gene-Rbm44|Rbm44	263	269	5
gene-Lrrfip1|Lrrfip1	7484	8048	3748
gene-Ramp1|Ramp1	2938	3543	1468
gene-1700020N18Rik|1700020N18Rik	0	0	46
gene-Hes6|Hes6	2433	2961	1295
gene-Per2|Per2	1632	1815	4057
gene-Gm35591|Gm35591	55	44	41
gene-Ube2f|Ube2f	2257	2575	2034
gene-Scly|Scly	3705	3937	3089
gene-Erfe|Erfe	217	159	11
gene-Ilkap|Ilkap	3397	3761	3227
STRG.1547|Gm7785	178	241	279
gene-Espnl|Espnl	436	507	1243
gene-Klhl30|Klhl30	224	302	81
gene-Traf3ip1|Traf3ip1	937	1042	1639
gene-Gm46117|Gm46117	0	0	0
gene-Twist2|Twist2	88	76	171
gene-Asb1|Asb1	9244	11081	2781
gene-Olfr1416|Olfr1416	0	0	0
gene-Olfr1415|Olfr1415	0	0	0
gene-Olfr1414|Olfr1414	0	0	0
gene-Ndufa10|Ndufa10	4353	4778	7062
gene-Mir6900|Mir6900	2	2	1
rna-NR_105865.1|Mir6900	2	2	2
gene-Gm46242|Gm46242	0	0	0
gene-Hdac4|Hdac4	2386	2709	3198
gene-LOC108167659|LOC108167659	4	7	6
gene-Gm29483|Gm29483	12	8	38
gene-Olfr1410|Olfr1410	0	0	4
gene-Otos|Otos	34865	42271	90069
gene-Olfr12|Olfr12	21	22	34
gene-Cops9|Cops9	1435	1422	3289
gene-Mab21l4|Mab21l4	31	40	60
gene-Crocc2|Crocc2	89	102	91
gene-Kif1a|Kif1a	5517	6554	53893
gene-Gm29480|Gm29480	0	0	0
gene-Mir149|Mir149	0	0	1
rna-NR_029559.1|Mir149	0	0	2
gene-Ankmy1|Ankmy1	42	59	89
gene-Gm36184|Gm36184	0	0	0
gene-LOC115487694|LOC115487694	0	0	0
gene-Gpr35|Gpr35	803	850	205
gene-Gm29481|Gm29481	35	78	18
gene-Gpc1|Gpc1	13262	15780	8490
gene-Dusp28|Dusp28	534	631	1564
gene-5033417F24Rik|5033417F24Rik	62	42	173
gene-Rnpepl1|Rnpepl1	6502	7786	4720
gene-9430060I03Rik|9430060I03Rik	13	22	13
gene-Capn10|Capn10	1445	1970	2198
gene-Bok|Bok	416	492	686
gene-Thap4|Thap4	1308	1484	1527
gene-Atg4b|Atg4b	5608	6362	4498
gene-Gm22089|Gm22089	0	0	0
gene-Dtymk|Dtymk	3591	4178	1819
gene-Ing5|Ing5	2581	2972	1395
gene-Neu4|Neu4	0	0	165
gene-D2hgdh|D2hgdh	1924	2099	931
gene-Pdcd1|Pdcd1	76	52	4
STRG.1652|Gm7895	174	176	30
gene-Gal3st2b|Gal3st2b	46	44	3
gene-Gal3st2c|Gal3st2c	12	23	0
gene-Gal3st2|Gal3st2	114	118	0
STRG.1654|Gm18666	189	259	163
gene-Gm7889|Gm7889	26	114	175
gene-Fam174a|Fam174a	1319	1558	2925
STRG.1659|Gm15427	6587	8165	3566
gene-St8sia4|St8sia4	1938	2230	317
gene-Gm30431|Gm30431	47	45	4
gene-Slco4c1|Slco4c1	673	917	75
gene-Panct2|Panct2	221	311	61
gene-Pask|Pask	1976	2287	297
gene-Mir6345|Mir6345	0	0	0
rna-NR_105763.1|Mir6345	0	0	0
gene-Gm26446|Gm26446	0	0	2
gene-Ano7|Ano7	35	32	7
gene-Hdlbp|Hdlbp	26104	30652	26233
gene-Septin2|Septin2	6571	8279	7169
gene-Stk25|Stk25	7111	8718	8813
gene-Sned1|Sned1	7400	8971	8131
gene-Mir6901|Mir6901	2	1	1
rna-NR_105866.1|Mir6901	2	1	0
gene-Mterf4|Mterf4	494	551	496
gene-Gm28535|Gm28535	22	11	12
STRG.1684|Gm7867	10	4	7
gene-Ppp1r7|Ppp1r7	2518	2927	3146
gene-Mir6902|Mir6902	3	1	0
rna-NR_105867.1|Mir6902	2	1	0
STRG.1701|Gm17415	24	34	8
gene-Farp2|Farp2	2862	3067	912
gene-Gm41920|Gm41920	16	52	16
STRG.1713|Gm6430	4785	5631	983
gene-Gm7135|Gm7135	0	0	0
gene-Macir|Macir	3490	3850	1522
gene-Ppip5k2|Ppip5k2	2876	3186	3167
gene-Gin1|Gin1	796	973	420
gene-1810006J02Rik|1810006J02Rik	58	29	12
STRG.1734|Gm46078	3	1	2
gene-Gm7967|Gm7967	4	0	0
STRG.1736|Psmb6-ps2	160	160	9
gene-Gm41925|Gm41925	0	0	0
gene-Gm29012|Gm29012	0	0	0
gene-Rnf152|Rnf152	1218	1618	8842
gene-Gm17634|Gm17634	46	43	61
gene-Cdh20|Cdh20	40	28	662
gene-Pam|Pam	5288	6107	10556
gene-Gm31771|Gm31771	0	0	0
gene-B230216N24Rik|B230216N24Rik	0	5	4
gene-Gm24465|Gm24465	0	0	0
STRG.1756|Gm3531	320	452	280
gene-Gm51640|Gm51640	13	8	0
gene-Gm51641|Gm51641	0	0	0
gene-Cntnap5b|Cntnap5b	0	0	594
gene-Gm41923|Gm41923	0	0	0
gene-Gm23602|Gm23602	0	0	0
STRG.1758|Prdx2-ps1	12	32	53
gene-Gm29667|Gm29667	204	213	4
gene-Gm41926|Gm41926	0	0	0
gene-Tnfrsf11a|Tnfrsf11a	466	505	372
gene-Gm41928|Gm41928	0	20	0
gene-Zcchc2|Zcchc2	3342	3753	2255
gene-Gm7160|Gm7160	19	20	13
gene-LOC115487637|LOC115487637	0	0	0
gene-Pign|Pign	2042	2320	1365
gene-Relch|Relch	2629	3113	3316
STRG.1777|Gm20302	9	28	0
rna-NR_106164.1|Mir3473f	0	0	0
gene-Gm37053|Gm37053	0	17	0
gene-Bcl2|Bcl2	1632	2021	2236
gene-Mir3473f|Mir3473f	1	0	0
gene-Gm20753|Gm20753	17	8	7
gene-Phlpp1|Phlpp1	2248	2634	5833
gene-Kdsr|Kdsr	918	1106	2100
gene-Serpinb5|Serpinb5	0	14	10
gene-Serpinb11|Serpinb11	68	147	266
gene-Gm24553|Gm24553	0	0	0
gene-Serpinb7|Serpinb7	12	8	0
gene-Serpinb2|Serpinb2	483	624	72
gene-Vps4b|Vps4b	3796	4530	3357
gene-Serpinb8|Serpinb8	156	203	180
gene-Serpinb10|Serpinb10	856	1093	205
gene-Dsel|Dsel	484	564	1027
gene-Cdh19|Cdh19	90	97	864
gene-n-TKctt7|n-TKctt7	0	0	0
gene-Gm32810|Gm32810	0	25	59
gene-Cdh7|Cdh7	0	0	848
gene-Tsn|Tsn	4276	5061	5608
gene-Nifk|Nifk	1770	1819	1207
gene-Inhbb|Inhbb	262	371	322
gene-Tfcp2l1|Tfcp2l1	348	433	980
STRG.1815|LOC115487679	1	1	1
gene-LOC108167704|LOC108167704	9	15	52
gene-Cntnap5a|Cntnap5a	566	643	1995
gene-Gli2|Gli2	513	633	1115
gene-Gm51642|Gm51642	0	12	0
gene-Mir6346|Mir6346	0	0	0
rna-NR_105764.1|Mir6346	0	0	0
gene-3830432H09Rik|3830432H09Rik	0	8	0
gene-Gm25322	0	0	0
gene-Tmem185b|Tmem185b	1287	1368	1179
gene-Gm29454	0	0	0
gene-Ralb|Ralb	2810	3272	2020
STRG.1823|Gm3551	4	7	2
gene-Clasp1|Clasp1	6600	7763	9110
gene-Gm26080|Gm26080	0	0	0
gene-2900060B14Rik|2900060B14Rik	0	11	0
gene-Epb41l5|Epb41l5	555	698	1461
gene-Cfap221|Cfap221	0	0	39
gene-Gm33817|Gm33817	0	0	0
gene-Sctr|Sctr	0	0	91
gene-Gm33764|Gm33764	0	0	0
gene-Gm41936|Gm41936	0	0	294
gene-Tmem37|Tmem37	787	928	4253
gene-Gm28209|Gm28209	0	8	0
gene-Tmem177|Tmem177	680	763	798
gene-Ptpn4|Ptpn4	1067	1425	5068
STRG.1850|Gm3851	107	126	6
gene-C1ql2|C1ql2	0	0	27
gene-Gm41939|Gm41939	0	0	0
gene-Marco|Marco	72	96	0
gene-En1|En1	0	12	7
gene-Gm34584|Gm34584	0	0	0
gene-2210011K15Rik|2210011K15Rik	8	23	0
gene-Insig2|Insig2	2925	3525	4505
gene-Gm41938|Gm41938	0	0	0
gene-3110009E18Rik|3110009E18Rik	69	88	77
gene-Dbi|Dbi	3831	4274	12677
gene-Steap3|Steap3	5213	6155	2591
gene-Htr5b|Htr5b	0	0	23
gene-Gm35243|Gm35243	28	28	22
gene-Ccdc93|Ccdc93	2886	3403	3162
gene-Ddx18|Ddx18	2267	2699	1411
gene-Dpp10|Dpp10	72	85	3210
gene-Gm24791|Gm24791	0	0	0
gene-Gm41941|Gm41941	0	0	0
gene-Gm25578|Gm25578	0	0	0
gene-Slc35f5|Slc35f5	1233	1378	1915
gene-Actr3|Actr3	21532	25550	10442
gene-Gpr39|Gpr39	0	0	43
gene-Gm41943|Gm41943	0	0	0
gene-Lypd1|Lypd1	1490	1802	9307
gene-Tmem163|Tmem163	595	798	2488
gene-Mgat5|Mgat5	3972	4636	5818
gene-Gm51747|Gm51747	0	5	0
gene-Gm23370|Gm23370	0	0	0
gene-Gm23734|Gm23734	0	0	0
gene-Gm51746|Gm51746	5	21	5
STRG.1892|Gm8451	187	226	130
gene-Gm41947|Gm41947	11	25	29
gene-Map3k19|Map3k19	72	131	130
gene-Gm35993|Gm35993	0	0	0
gene-Acmsd|Acmsd	255	350	12
gene-2900009J06Rik|2900009J06Rik	9	6	7
gene-Ccnt2|Ccnt2	4934	5771	3490
gene-Nckap5|Nckap5	117	150	315
gene-Gm35562|Gm35562	0	13	37
gene-Rab3gap1|Rab3gap1	3988	4459	6520
gene-Zranb3|Zranb3	1497	1703	497
gene-Gm28800|Gm28800	91	82	14
STRG.1913|Gm8283	536	786	46
STRG.1914|Rpl28-ps1	651	867	1113
gene-R3hdm1|R3hdm1	5454	6607	4029
gene-Gm29383	0	17	0
gene-Mir128-1|Mir128-1	0	0	0
rna-NR_029543.1|Mir128-1	0	0	0
STRG.1922|Gm6170	1316	1500	58
gene-Dars|Dars	4623	5204	3775
gene-Ubxn4|Ubxn4	4265	5159	5652
gene-Gm41949|Gm41949	153	134	35
gene-Lct|Lct	236	258	93
gene-Mcm6|Mcm6	18652	21226	1490
gene-Gm41950|Gm41950	0	0	0
gene-Cxcr4|Cxcr4	11859	13892	965
gene-Thsd7b|Thsd7b	193	168	599
gene-Gm36347|Gm36347	0	0	0
gene-Gm29428	0	4	0
STRG.1937|Gm15790	99	122	31
STRG.1938|Rpl31-ps9	498	504	173
gene-AA986860|AA986860	467	599	731
gene-Gm28857|Gm28857	66	67	18
gene-Pigr|Pigr	0	0	36
gene-Fcamr|Fcamr	147	129	21
gene-Gm15848|Gm15848	58	68	0
gene-C4bp-ps1|C4bp-ps1	0	0	12
gene-Pfkfb2|Pfkfb2	3001	3451	4878
gene-Yod1|Yod1	1045	1276	530
gene-Il10|Il10	8	0	0
gene-Cd55b|Cd55b	87	22	0
gene-Cd55|Cd55	3623	4180	206
gene-Gm16083|Gm16083	13	29	25
gene-Zp3r|Zp3r	0	0	0
gene-Gm23623|Gm23623	0	0	0
gene-Cd55os|Cd55os	31	54	0
gene-Fcmr|Fcmr	1797	2175	60
gene-Gm51643|Gm51643	0	5	0
gene-Eif2d|Eif2d	2941	3418	2350
gene-Rassf5|Rassf5	5241	6009	1752
gene-Gm28913|Gm28913	110	162	74
gene-Gm51644|Gm51644	0	18	0
gene-Mapkapk2|Mapkapk2	10053	12420	7211
STRG.1960|Gm25549	2	0	3
gene-Dyrk3|Dyrk3	2045	2706	278
gene-Ikbke|Ikbke	2624	2957	603
gene-Srgap2|Srgap2	7964	9426	10166
STRG.1983|Gm29487	12	21	8
gene-Fam72a|Fam72a	209	246	144
gene-Pm20d1|Pm20d1	37	32	200
gene-Slc26a9|Slc26a9	0	24	0
gene-Slc41a1|Slc41a1	5163	5627	10654
gene-Rab29|Rab29	1096	1225	672
gene-Avpr1b|Avpr1b	0	0	0
gene-Rab7b|Rab7b	525	482	252
STRG.1990|Gm8532	21	28	7
gene-Ctse|Ctse	35139	41765	1812
gene-Nucks1|Nucks1	6487	7835	5897
gene-4833413N01Rik|4833413N01Rik	0	0	0
gene-Gm37120|Gm37120	92	127	15
gene-Cdk18|Cdk18	630	791	1230
gene-Lemd1|Lemd1	75	104	426
gene-Mir135b|Mir135b	0	0	2
rna-NR_029777.1|Mir135b	0	0	2
gene-Gm29695|Gm29695	283	336	975
gene-Slc45a3|Slc45a3	831	1077	1039
gene-Elk4|Elk4	2645	3108	551
gene-Mfsd4a|Mfsd4a	1342	1855	2885
gene-Gm51646|Gm51646	0	0	0
gene-Cntn2|Cntn2	534	706	14434
gene-Gm38687|Gm38687	0	16	18
gene-Gm31159|Gm31159	36	24	227
gene-Lrrn2|Lrrn2	237	228	3552
gene-Nfasc|Nfasc	4842	5960	21735
gene-Gm46157|Gm46157	0	8	11
gene-Gm10538|Gm10538	0	0	0
gene-Klhdc8a|Klhdc8a	508	644	2636
gene-Nuak2|Nuak2	1215	1425	291
gene-F730311O21Rik|F730311O21Rik	591	817	21
gene-LOC115487632|LOC115487632	0	0	0
gene-Rbbp5|Rbbp5	3381	4165	3705
gene-Tmem81|Tmem81	413	397	404
gene-Gm30744|Gm30744	29	15	3
gene-Tmcc2|Tmcc2	47956	55398	13175
gene-Dstyk|Dstyk	4690	5630	7217
gene-6030442K20Rik|6030442K20Rik	38	60	33
gene-Mdm4|Mdm4	10978	12879	7202
gene-n-TKctt26|n-TKctt26	0	0	1
gene-n-TKctt25|n-TKctt25	0	0	0
STRG.2063|Gm29257	4	33	3
gene-Gm41953|Gm41953	7	0	0
gene-Ren1|Ren1	76	66	3
gene-Etnk2|Etnk2	107	164	0
gene-Sox13|Sox13	1582	1753	767
gene-Snrpe|Snrpe	1931	2587	1431
gene-Pik3c2b|Pik3c2b	3221	3904	1637
gene-Gm51647|Gm51647	0	10	4
gene-Plekha6|Plekha6	2531	3062	4061
gene-Gm51648|Gm51648	0	0	6
gene-Gm28609|Gm28609	147	163	29
gene-Ppp1r15b|Ppp1r15b	12811	15197	6347
gene-Gm19461|Gm19461	35	55	169
gene-Zc3h11a|Zc3h11a	8353	9614	10058
gene-Zbed6|Zbed6	3311	3761	2675
gene-Gm41954|Gm41954	0	0	0
gene-Gm28441|Gm28441	0	0	0
gene-Optc|Optc	0	18	18
gene-Prelp|Prelp	6464	6819	5973
gene-Atp2b4|Atp2b4	13776	15573	3858
gene-Lax1|Lax1	814	964	100
gene-Mir6903|Mir6903	3	1	1
rna-NR_105868.1|Mir6903	2	1	0
STRG.2131|Gm8618	4	0	0
gene-Bmncr|Bmncr	78	53	64
gene-Gm31974|Gm31974	0	0	4
gene-Gm32039|Gm32039	42	32	8
gene-Fmod|Fmod	5146	6515	4725
gene-Gm19497|Gm19497	36	32	8
gene-Btg2|Btg2	11619	13618	2026
gene-Myog|Myog	21	30	27
gene-Adora1|Adora1	223	224	7946
gene-Mybph|Mybph	349	374	236
gene-Chit1|Chit1	109	157	115
gene-Gm46158|Gm46158	0	0	0
gene-Chil1|Chil1	7556	8698	1542
gene-Ppfia4|Ppfia4	2060	2513	13129
gene-Gm32267|Gm32267	40	80	45
gene-Tmem183a|Tmem183a	3748	4211	4951
gene-Gm46159|Gm46159	0	9	0
gene-Mgat4f|Mgat4f	11	0	0
gene-Cyb5r1|Cyb5r1	2522	3002	2409
gene-Adipor1|Adipor1	20120	24407	10516
gene-Klhl12|Klhl12	4243	5340	2724
gene-Rabif|Rabif	1796	2130	1473
gene-Gm25612|Gm25612	10	17	2
STRG.2169|Gm15454	40	56	151
gene-Mgat4e|Mgat4e	0	0	0
gene-Gm46160|Gm46160	0	0	0
gene-Kdm5b|Kdm5b	3391	3907	4192
gene-Syt2|Syt2	2365	2593	22939
gene-Ube2t|Ube2t	881	1042	104
gene-Lgr6|Lgr6	1193	1521	666
gene-Ppp1r12b|Ppp1r12b	5442	6251	6591
gene-Gm32670|Gm32670	0	0	4
gene-LOC115487658|LOC115487658	0	0	0
gene-Gm51265|Gm51265	0	0	0
rna-NR_162775.1|Gm51265	0	0	0
gene-Gm51748|Gm51748	16	28	4
gene-Ptprv|Ptprv	962	1290	197
gene-Ptpn7|Ptpn7	5653	6252	363
gene-Gpr37l1|Gpr37l1	673	779	15148
gene-Arl8a|Arl8a	3149	3712	6058
gene-Gm41955|Gm41955	0	0	0
gene-Gm19642	0	0	4
gene-Timm17a|Timm17a	1379	1343	2967
gene-Gm41956|Gm41956	0	0	0
gene-Shisa4|Shisa4	807	866	1565
gene-Ipo9|Ipo9	7536	9095	10113
STRG.2192|Gm4204	1094	1366	1010
gene-Elf3|Elf3	141	201	466
gene-Rnpep|Rnpep	4800	5738	3268
gene-Lmod1|Lmod1	367	372	997
gene-Phlda3|Phlda3	840	989	1771
gene-Tnni1|Tnni1	27	79	167
gene-Lad1|Lad1	175	211	720
gene-Tnnt2|Tnnt2	42	61	142
gene-Pkp1|Pkp1	895	1063	2790
gene-Gm15850|Gm15850	0	0	0
gene-Cacna1s|Cacna1s	842	975	856
gene-Igfn1|Igfn1	36	57	42
gene-Tmem9|Tmem9	3235	3726	4166
gene-Nav1|Nav1	6017	7402	4227
gene-Gm32940|Gm32940	48	85	62
gene-Csrp1|Csrp1	16336	19001	21697
gene-Mir1231|Mir1231	5	3	0
rna-NR_049188.1|Mir1231	2	2	0
gene-Gm4793|Gm4793	17	8	3
gene-Gm32835|Gm32835	46	58	11
gene-Gpr25|Gpr25	39	32	133
gene-Mroh3|Mroh3	92	70	178
gene-Inava|Inava	270	335	1104
gene-Gm3878	0	0	0
gene-Kif21b|Kif21b	13545	15243	2810
gene-Ddx59|Ddx59	750	848	473
gene-9230116N13Rik|9230116N13Rik	74	123	23
gene-Camsap2|Camsap2	5655	6677	10073
gene-Gm24086	0	0	0
gene-Platr22|Platr22	4	6	28
STRG.2247|Gm29718	272	377	19
gene-Mir181b-1|Mir181b-1	2	2	0
rna-NR_029820.1|Mir181b-1	2	2	0
gene-Gm34056|Gm34056	0	0	5
gene-Gm41958|Gm41958	57	90	127
gene-Gm19705|Gm19705	74	46	66
gene-Gm34353|Gm34353	8	16	17
gene-Nr5a2|Nr5a2	43	72	49
gene-Gm4258|Gm4258	189	319	131
gene-Kif14|Kif14	3688	4345	166
STRG.2263|Gm29485	16	16	6
gene-Zfp281|Zfp281	1754	2121	2594
gene-Atp6v1g3|Atp6v1g3	36	68	198
gene-2310009B15Rik|2310009B15Rik	231	231	257
gene-Nek7|Nek7	3044	3832	4646
gene-Crb1|Crb1	0	0	11
gene-Zbtb41|Zbtb41	1024	1384	1976
gene-Ptprc|Ptprc	15980	18993	1109
gene-Dennd1b|Dennd1b	1537	1698	1601
gene-4930596I21Rik|4930596I21Rik	0	3	0
gene-Gm16305	0	0	0
gene-Gm41960|Gm41960	5	25	5
gene-Aspm|Aspm	6795	7896	336
STRG.2288|Gm5835	38	75	38
gene-Kcnt2|Kcnt2	134	122	61
gene-4930590L20Rik|4930590L20Rik	0	0	0
gene-Uchl5|Uchl5	1367	1566	1363
gene-LOC115487685|LOC115487685	3	3	13
gene-Gm4788|Gm4788	0	5	0
gene-Gm25619|Gm25619	0	0	0
gene-Gm41963|Gm41963	0	0	0
gene-Gm26048|Gm26048	0	0	0
gene-Cfhr2|Cfhr2	91	43	16
STRG.2298|Gm16332	931	969	125
STRG.2299|Gm5837	44	68	6
gene-Cfh|Cfh	18795	23558	4338
gene-Rgs1|Rgs1	40	39	4
gene-Rgs13|Rgs13	0	0	0
gene-Rgs2|Rgs2	3482	3848	4222
gene-Cdc73|Cdc73	1884	2199	2293
gene-Gm38658|Gm38658	0	0	0
gene-Gm46161|Gm46161	0	0	0
gene-Glrx2|Glrx2	1007	1232	2124
gene-B3galt2|B3galt2	140	156	814
gene-Ro60|Ro60	1266	1527	4008
gene-Rgs18|Rgs18	1470	1809	375
STRG.2315|Gm5263	55	44	4
gene-Ptgs2os2|Ptgs2os2	0	18	0
STRG.2316|Rbm3-ps	327	378	318
gene-Ptgs2os|Ptgs2os	0	0	0
gene-Ptgs2|Ptgs2	84	63	145
gene-Pla2g4a|Pla2g4a	1322	1535	864
gene-Brinp3|Brinp3	36	35	395
gene-3110040M04Rik|3110040M04Rik	15	52	3
gene-Gm46162|Gm46162	328	318	85
gene-Gm36297|Gm36297	0	0	0
gene-Gm22756|Gm22756	0	0	0
gene-Gm36139|Gm36139	4	0	0
gene-Gm36077|Gm36077	0	0	0
gene-C730036E19Rik|C730036E19Rik	91	88	13
gene-Odr4|Odr4	1574	1931	2945
gene-Prg4|Prg4	685	749	964
gene-Tpr|Tpr	12724	15180	9449
gene-Hmcn1|Hmcn1	1505	1730	2543
gene-Rnf2|Rnf2	1777	2254	2273
gene-Gm41969|Gm41969	0	0	0
gene-2810414N06Rik|2810414N06Rik	61	60	26
gene-Ivns1abp|Ivns1abp	13372	16305	13229
gene-Swt1|Swt1	814	1072	888
gene-Trmt1l|Trmt1l	2190	2695	1869
gene-Mir7682|Mir7682	3	0	0
rna-NR_106150.1|Mir7682	2	0	0
gene-Niban1|Niban1	5861	6405	1159
STRG.2355|LOC115487698	4	0	0
gene-Edem3|Edem3	5263	5957	4895
gene-Gm41970|Gm41970	9	0	11
gene-Gm36920|Gm36920	9	18	0
gene-Tsen15|Tsen15	531	674	972
gene-1700025G04Rik|1700025G04Rik	2891	3406	9633
gene-Colgalt2|Colgalt2	2512	2742	5586
STRG.2368|Gm15618	2	0	0
gene-Rgl1|Rgl1	3518	4177	3096
gene-Gm51749|Gm51749	17	0	5
gene-Gm7278	0	0	8
gene-Apobec4|Apobec4	0	0	4
gene-Arpc5|Arpc5	16847	19686	6805
STRG.2374|Gm8976	4	4	4
gene-Lamc2|Lamc2	735	793	2163
gene-Nmnat2|Nmnat2	1041	1221	9580
gene-Ncf2|Ncf2	9553	10945	743
gene-Smg7|Smg7	7550	8840	8840
gene-Lamc1|Lamc1	10633	12897	15096
STRG.2392|Gm8818	5	12	2
STRG.2393|Gm6652	236	291	31
gene-Npl|Npl	432	502	291
gene-Shcbp1l|Shcbp1l	47	78	76
gene-E330020D12Rik|E330020D12Rik	301	372	18
gene-Gm25588|Gm25588	3	0	3
gene-Dhx9|Dhx9	15820	18811	10719
gene-n-TIaat13|n-TIaat13	2	2	0
gene-Rgs8|Rgs8	104	78	20351
gene-C230024C17Rik|C230024C17Rik	0	0	12
gene-Rnasel|Rnasel	5132	6172	356
gene-Rgs16|Rgs16	166	163	647
gene-Gm46165|Gm46165	0	0	1
gene-Gm25336	0	0	0
gene-LOC108167736|LOC108167736	9	6	13
gene-Gm30388|Gm30388	10	0	10
gene-Zfp648|Zfp648	75	96	139
gene-4930452N14Rik|4930452N14Rik	0	0	0
gene-4930532M18Rik|4930532M18Rik	0	0	0
gene-Gm30465|Gm30465	0	0	0
gene-Rgsl1|Rgsl1	0	39	21
gene-Gm41974|Gm41974	10	0	0
gene-Teddm2|Teddm2	0	5	8
gene-Teddm1b|Teddm1b	0	5	0
gene-Teddm1a|Teddm1a	4	0	0
gene-Gm38440|Gm38440	56	58	36
gene-Mir8114|Mir8114	22	19	1
gene-Glul|Glul	39840	45605	99766
rna-NR_106194.1|Mir8114	1	1	1
gene-Gm51650|Gm51650	8	0	0
gene-Gm30521|Gm30521	0	0	0
gene-Gm41976|Gm41976	0	12	0
gene-Gm41977|Gm41977	20	36	0
gene-Gm41980|Gm41980	11	0	0
gene-Gm41979|Gm41979	0	0	0
gene-Gm51651|Gm51651	0	0	0
gene-Gm9530|Gm9530	0	12	29
gene-Ier5|Ier5	2971	3466	1091
gene-Gm30922|Gm30922	0	0	0
gene-Mr1|Mr1	570	674	1193
gene-Cacna1e|Cacna1e	7589	8812	12308
gene-Gm51649|Gm51649	23	0	0
gene-Stx6|Stx6	3341	3840	4572
STRG.2442|Gm8850	26	10	15
gene-BC034090|BC034090	893	1050	1205
gene-Gm31102|Gm31102	0	0	11
gene-Gm5532|Gm5532	28	52	44
gene-Xpr1|Xpr1	4634	5775	5691
gene-Acbd6|Acbd6	1787	2378	2267
gene-Lhx4|Lhx4	0	0	0
gene-Qsox1|Qsox1	5565	6406	6607
gene-Nphs2|Nphs2	8	0	23
gene-Tdrd5|Tdrd5	0	76	77
gene-Fam163a|Fam163a	20	20	130
STRG.2458|Csnk2a3	1141	1100	2834
gene-Axdnd1|Axdnd1	0	24	26
gene-Soat1|Soat1	2778	3266	2837
STRG.2459|Gm2000	800	896	602
gene-Abl2|Abl2	3654	4761	4171
gene-Cep350|Cep350	7340	8639	4407
gene-Gm51652|Gm51652	0	0	4
gene-Gm37383|Gm37383	28	9	0
gene-Tor1aip1|Tor1aip1	6599	7453	6201
gene-Gm51653|Gm51653	179	266	81
gene-Tor1aip2|Tor1aip2	7356	8722	5826
STRG.2474|Gm36934	8	16	4
STRG.2476|Gm23744	1	0	0
gene-Tor3a|Tor3a	2082	2431	1116
gene-Gm39683|Gm39683	0	0	4
gene-Fam20b|Fam20b	6376	7610	8256
gene-Gm39685|Gm39685	5	0	0
gene-Tex35|Tex35	0	0	9
gene-Gm30694|Gm30694	9	9	8
gene-Cryzl2|Cryzl2	1327	1509	1979
gene-Gm15486|Gm15486	0	0	0
gene-Sec16b|Sec16b	831	933	114
gene-Rasal2|Rasal2	2567	2903	6005
gene-Gm51654|Gm51654	0	0	9
gene-2810025M15Rik|2810025M15Rik	610	619	911
gene-Ralgps2|Ralgps2	3352	4004	2704
STRG.2510|Gm15428	20	16	0
gene-Angptl1|Angptl1	140	224	320
gene-4930439D14Rik|4930439D14Rik	27	49	16
gene-Brinp2|Brinp2	104	112	1001
gene-Pappa2|Pappa2	214	328	54
gene-Astn1|Astn1	131	164	2770
gene-Gm37679|Gm37679	0	0	0
gene-Mir488|Mir488	0	0	0
rna-NR_030441.1|Mir488	0	0	0
gene-Pou5f1-rs1|Pou5f1-rs1	0	3	0
gene-Scarna3a|Scarna3a	0	6	2
gene-Mir1843b|Mir1843b	0	1	1
rna-NR_039543.1|Mir1843b	0	2	2
gene-Cop1|Cop1	3964	5228	3548
gene-Tnn|Tnn	589	734	37
gene-Mrps14|Mrps14	1404	1605	1726
gene-Gm31493|Gm31493	181	295	21
gene-Gm31667|Gm31667	0	8	0
gene-4930562F07Rik|4930562F07Rik	18	46	9
STRG.2545|Gm24719	3	5	0
gene-Gm37294|Gm37294	9	0	0
gene-4930523C07Rik|4930523C07Rik	3782	5005	1281
gene-Tnr|Tnr	132	111	4264
gene-Gm31348|Gm31348	0	0	7
gene-Cacybp|Cacybp	2122	2380	3734
gene-Rc3h1|Rc3h1	3930	4781	3577
gene-Rabgap1l|Rabgap1l	4247	4577	5553
gene-Mir1927|Mir1927	0	0	0
rna-NR_035448.1|Mir1927	0	0	0
gene-Gpr52|Gpr52	22	16	115
gene-Gm23528|Gm23528	0	0	0
gene-Gm37083|Gm37083	11	4	7
gene-Ankrd45|Ankrd45	52	88	614
gene-Tex50|Tex50	0	0	0
gene-Klhl20|Klhl20	2423	3088	1749
gene-Serpinc1|Serpinc1	25	29	11
gene-LOC115487665|LOC115487665	0	0	0
gene-Zbtb37|Zbtb37	2510	3212	2075
gene-Gas5|Gas5	4002	4888	2803
gene-LOC115487643|LOC115487643	122	148	24
gene-LOC115487678|LOC115487678	61	79	14
gene-LOC115487638|LOC115487638	538	593	86
gene-LOC115487644|LOC115487644	139	181	38
gene-LOC115487677|LOC115487677	165	175	69
gene-Dars2|Dars2	2208	2269	1443
gene-LOC115487645|LOC115487645	1	1	1
gene-Snord47|Snord47	1	1	1
gene-LOC115487640|LOC115487640	1	1	1
gene-Cenpl|Cenpl	1182	1494	221
gene-Tnfsf18|Tnfsf18	9	9	5
gene-Tnfsf4|Tnfsf4	0	0	0
gene-Prdx6|Prdx6	7801	9448	12739
STRG.2605|Gm15429	1286	1609	1096
gene-Fasl|Fasl	44	37	10
gene-Gm31925|Gm31925	0	0	0
gene-4930558K02Rik|4930558K02Rik	0	0	4
gene-Pigc|Pigc	1176	1356	1317
gene-Suco|Suco	3155	4192	4070
gene-Eef1aknmt|Eef1aknmt	1186	1351	995
gene-Dnm3|Dnm3	683	760	7818
rna-NR_029810.1|Mir199a-2	0	2	1
gene-Gm39688|Gm39688	0	0	0
gene-Gm31985|Gm31985	0	0	3
gene-2810442N19Rik|2810442N19Rik	5	13	5
gene-Dnm3os|Dnm3os	551	791	275
gene-Mir199a-2|Mir199a-2	1	1	1
gene-Mir214|Mir214	1	1	1
rna-NR_029796.1|Mir214	2	2	2
gene-Fmo4|Fmo4	0	0	7
gene-Fmo2|Fmo2	248	257	424
gene-Fmo3|Fmo3	0	29	93
gene-Fmo1|Fmo1	677	930	567
gene-Gorab|Gorab	410	460	584
gene-Gm24940|Gm24940	0	0	0
gene-LOC108167740|LOC108167740	0	3	0
gene-Gm20471|Gm20471	0	0	4
gene-Prrx1|Prrx1	2611	3139	1172
gene-Gm32333|Gm32333	0	0	0
gene-Gm39689|Gm39689	0	0	0
gene-LOC115487660|LOC115487660	0	0	0
gene-Mettl11b|Mettl11b	14	35	90
gene-Vamp4|Vamp4	1187	1602	3340
gene-Gm5705	0	0	0
gene-Myocos|Myocos	0	0	0
gene-Prrc2c|Prrc2c	18586	22045	14111
gene-Myoc|Myoc	188	206	124
gene-Kifap3|Kifap3	1204	1634	7828
gene-Gm51663|Gm51663	0	3	0
gene-Scyl3|Scyl3	2040	2459	1502
gene-BC055324|BC055324	1444	1708	382
gene-Mettl18|Mettl18	164	138	270
gene-Sele|Sele	804	927	15
gene-Gm51665|Gm51665	57	67	0
gene-Sell|Sell	9611	11423	443
gene-Slc19a2|Slc19a2	662	805	1369
gene-Ccdc181|Ccdc181	483	660	964
gene-Gm51287|Gm51287	0	0	0
rna-NR_162776.1|Gm51287	0	0	0
gene-Selp|Selp	2992	3390	214
gene-Gm16548|Gm16548	29	30	13
gene-F5|F5	7649	9467	737
gene-Gm39691|Gm39691	0	0	0
gene-Gm26685|Gm26685	0	0	0
gene-Gm32569|Gm32569	112	107	41
gene-Dpt|Dpt	339	391	110
gene-Xcl1|Xcl1	33	26	0
gene-Tbx19|Tbx19	8	0	0
gene-Nme7|Nme7	603	822	643
gene-Gm39690|Gm39690	0	8	0
gene-Gm32391|Gm32391	79	176	335
gene-Blzf1|Blzf1	971	1100	1312
gene-Atp1b1|Atp1b1	15513	18457	84915
gene-Gm32652|Gm32652	427	503	56
gene-Gm20743|Gm20743	243	317	131
gene-Sft2d2|Sft2d2	9515	11010	14215
gene-Adcy10|Adcy10	0	21	33
gene-Gm51751|Gm51751	0	0	0
gene-Gm51750|Gm51750	0	5	14
gene-Mpzl1|Mpzl1	4180	4946	9332
gene-Tiprl|Tiprl	1605	1804	2546
gene-Gpr161|Gpr161	216	299	533
gene-Dcaf6|Dcaf6	4445	5364	5082
gene-Gm24637	0	0	0
gene-Mpc2|Mpc2	2457	2975	4625
gene-Gm51752|Gm51752	0	18	11
gene-Rcsd1|Rcsd1	10376	11814	2142
gene-Mael|Mael	0	0	8
gene-Gpa33|Gpa33	0	0	8
gene-Dusp27|Dusp27	666	576	820
gene-Ildr2|Ildr2	2437	2711	3258
STRG.2738|Gm16418	632	635	836
STRG.2739|Gm6286	124	173	27
gene-Cd247|Cd247	235	274	78
gene-Gm23402|Gm23402	0	0	0
gene-Gm32999|Gm32999	67	50	38
gene-Pou2f1|Pou2f1	3595	4611	3289
gene-Gm46168|Gm46168	49	81	12
gene-Creg1|Creg1	11532	14199	6060
gene-Pogk|Pogk	2058	2455	5571
gene-Tada1|Tada1	2088	2482	1980
gene-Fam78b|Fam78b	2817	3410	2063
gene-Gm33610|Gm33610	27	51	50
gene-Gm16701|Gm16701	59	51	51
gene-Uck2|Uck2	4825	5288	2460
gene-Gm51816	0	4	0
gene-Gm46170|Gm46170	0	4	0
gene-Gm24182|Gm24182	0	0	0
gene-Tmco1|Tmco1	2615	3211	4162
gene-Aldh9a1|Aldh9a1	4925	5702	3591
gene-Gm34207|Gm34207	0	0	0
gene-Lrrc52|Lrrc52	36	20	71
gene-Rxrg|Rxrg	115	128	250
gene-Mgst3|Mgst3	7389	8661	4348
gene-Lmx1a|Lmx1a	589	697	1661
gene-Gm34421|Gm34421	0	0	0
gene-Gm34320|Gm34320	0	0	0
gene-Gm34624|Gm34624	0	0	0
gene-Nuf2|Nuf2	2680	3384	260
gene-Gm39699|Gm39699	0	0	0
gene-Ccdc190|Ccdc190	24	22	323
gene-Rgs4|Rgs4	1031	1252	4045
gene-Rgs5|Rgs5	3806	4601	9956
gene-Pbx1|Pbx1	4138	4659	6316
gene-Gm51671|Gm51671	72	172	25
gene-Hsd17b7|Hsd17b7	708	780	2200
gene-3110045C21Rik|3110045C21Rik	0	36	29
gene-Ddr2|Ddr2	6623	7722	8280
gene-Gm6345|Gm6345	16	0	19
gene-Sh2d1b1|Sh2d1b1	273	343	21
gene-Uap1|Uap1	3168	3707	3135
gene-Uhmk1|Uhmk1	8002	9569	14829
gene-Sh2d1b2|Sh2d1b2	14	0	0
gene-Gm7694|Gm7694	1318	1239	781
gene-Spata46|Spata46	31	36	11
gene-Nos1ap|Nos1ap	756	761	2455
gene-Gm46171|Gm46171	8	5	19
gene-Dusp12|Dusp12	613	826	692
gene-Fcrlb|Fcrlb	494	654	1755
gene-Gm39701|Gm39701	171	168	24
gene-Fcrla|Fcrla	4323	5131	237
STRG.2816|Gm2962	513	665	107
gene-Atf6|Atf6	5003	5824	5214
gene-Gm23523|Gm23523	0	0	0
gene-Gm25235|Gm25235	0	0	0
gene-Gm9929|Gm9929	17	16	7
gene-Olfml2b|Olfml2b	4225	5368	623
gene-Gm29733|Gm29733	1	3	0
gene-Cfap126|Cfap126	221	236	478
gene-Gm34968|Gm34968	0	0	0
gene-Gm26110|Gm26110	0	0	0
gene-Gm35090|Gm35090	0	0	0
gene-n-TNgtt6|n-TNgtt6	0	0	0
gene-n-TDgtc4|n-TDgtc4	0	0	0
gene-n-TGtcc2|n-TGtcc2	0	0	0
gene-n-TLcag3|n-TLcag3	0	0	0
gene-n-TGgcc4|n-TGgcc4	0	0	0
gene-Fcgr3|Fcgr3	5711	6530	553
gene-n-TEctc5|n-TEctc5	0	1	0
gene-Mir6546|Mir6546	0	0	0
rna-NR_106103.1|Mir6546	0	0	0
gene-n-TGtcc1|n-TGtcc1	0	0	0
gene-n-TDgtc3|n-TDgtc3	0	0	1
gene-n-TLcag6|n-TLcag6	0	0	0
gene-n-TGgcc12|n-TGgcc12	0	0	0
gene-n-TEctc8|n-TEctc8	0	1	0
gene-n-TGtcc5|n-TGtcc5	0	0	0
gene-n-TDgtc7|n-TDgtc7	0	0	1
gene-n-TLcag7|n-TLcag7	0	0	0
gene-n-TGgcc13|n-TGgcc13	0	0	0
gene-n-TEctc7|n-TEctc7	0	1	0
gene-n-TGtcc4|n-TGtcc4	0	0	0
gene-n-TDgtc6|n-TDgtc6	0	0	1
gene-n-TLcag8|n-TLcag8	0	0	0
gene-Fcgr2b|Fcgr2b	2713	3500	316
gene-Gm10522|Gm10522	9	0	0
gene-Fcgr4|Fcgr4	769	1022	59
gene-n-TGgcc14|n-TGgcc14	1	0	0
gene-Sdhc|Sdhc	4245	5036	6837
gene-Gm46172|Gm46172	72	99	61
gene-Pcp4l1|Pcp4l1	915	1186	2709
gene-Mpz|Mpz	21573	24890	75810
gene-Nr1i3|Nr1i3	0	0	23
gene-Apoa2|Apoa2	20	34	49
gene-Tomm40l|Tomm40l	2089	2762	3851
gene-Fcer1g|Fcer1g	6353	7526	667
gene-Alyref2|Alyref2	460	505	325
gene-Itln1|Itln1	0	0	4
gene-Gm35200|Gm35200	42	60	0
gene-Cd244a|Cd244a	420	605	43
gene-Ly9|Ly9	1899	2083	156
gene-Slamf7|Slamf7	1907	2430	94
gene-Mir7683|Mir7683	5	4	0
rna-NR_106151.1|Mir7683	2	2	0
gene-Cd48|Cd48	1990	2286	174
gene-Tma7-ps|Tma7-ps	124	150	833
gene-Slamf1|Slamf1	979	1044	231
gene-Nhlh1|Nhlh1	16	20	35
gene-Vangl2|Vangl2	1241	1523	1421
gene-Cd84|Cd84	3439	4238	508
gene-Gm51686|Gm51686	82	66	9
gene-Gm37065|Gm37065	193	240	13
gene-Slamf6|Slamf6	1576	1803	50
gene-Gm25151	0	0	0
gene-Dedd|Dedd	1668	2027	1886
gene-Pfdn2|Pfdn2	2668	3277	3988
gene-Usf1|Usf1	4735	5538	3934
gene-Gm26641|Gm26641	0	16	32
gene-Ndufs2|Ndufs2	9987	11044	15456
gene-Adamts4|Adamts4	561	638	1598
gene-B4galt3|B4galt3	3321	3920	3117
gene-Ppox|Ppox	12594	14731	3127
gene-Usp21|Usp21	2947	3212	2493
gene-Ufc1|Ufc1	2418	2979	3910
STRG.2906|Rpl27-ps1	43	51	10
gene-Gm20045|Gm20045	171	213	207
gene-Nit1|Nit1	2331	2472	2377
gene-Klhdc9|Klhdc9	98	95	183
gene-Nectin4|Nectin4	419	434	1095
gene-Arhgap30|Arhgap30	12508	14567	703
gene-Tstd1|Tstd1	117	98	54
gene-F11r|F11r	2041	2366	3449
gene-Pigm|Pigm	1820	2412	1501
gene-Kcnj9|Kcnj9	190	237	5291
gene-Igsf8|Igsf8	3738	4113	7102
gene-Kcnj10|Kcnj10	3127	3674	17617
gene-Slamf8|Slamf8	156	126	12
gene-Fcrl6|Fcrl6	44	83	4
gene-Gm35601|Gm35601	37	25	8
gene-Dusp23|Dusp23	633	856	435
gene-Crp|Crp	0	0	0
STRG.2940|Gm2710	4	0	3
gene-Fcer1a|Fcer1a	48	100	0
gene-Gm35686|Gm35686	5	0	0
gene-Gm26077	0	0	0
gene-Olfr16|Olfr16	0	0	0
gene-Igsf9|Igsf9	774	812	469
gene-Vsig8|Vsig8	17	41	15
gene-Slamf9|Slamf9	505	516	79
gene-Gm35522|Gm35522	25	47	6
gene-Tagln2|Tagln2	8834	10844	1965
gene-Gm37125|Gm37125	141	105	32
gene-Cfap45|Cfap45	165	138	325
gene-4933439K11Rik|4933439K11Rik	27	39	17
gene-Ncstn|Ncstn	7117	8517	5903
gene-Pex19|Pex19	3589	3979	5506
gene-Gm17224|Gm17224	50	85	85
gene-Atp1a4|Atp1a4	0	0	99
gene-Copa|Copa	22015	26294	20135
STRG.2965|Gm10171	456	281	640
gene-Dcaf8|Dcaf8	11022	13493	12208
gene-Pea15a|Pea15a	4673	5320	21738
gene-Casq1|Casq1	1704	2289	2098
gene-LOC115487369|LOC115487369	8	13	5
gene-Atp1a2|Atp1a2	39808	46555	143932
gene-Gm39704|Gm39704	75	88	99
gene-Ifi207|Ifi207	931	1017	107
gene-Mptx2|Mptx2	0	0	0
gene-Aim2|Aim2	1498	1610	181
gene-n-TRtct5|n-TRtct5	0	0	0
gene-Ifi206|Ifi206	812	1001	28
gene-Ifi213|Ifi213	1248	1622	95
gene-Gm7871	0	0	0
gene-Ackr1|Ackr1	1295	1717	104
gene-Cadm3|Cadm3	3116	3376	43266
gene-Ifi214|Ifi214	472	576	6
gene-Ifi209|Ifi209	3627	4633	172
gene-Ifi208|Ifi208	363	467	42
gene-Olfr433|Olfr433	8	5	2
gene-Ifi205|Ifi205	101	168	20
gene-Mndal|Mndal	2362	2818	418
gene-Ifi203|Ifi203	2752	3281	299
gene-Ifi202b|Ifi202b	0	0	6
gene-Ifi204|Ifi204	701	769	54
STRG.3015|Ifi203-ps	127	152	38
gene-Ifi211|Ifi211	440	573	56
gene-Olfr419|Olfr419	39	23	0
gene-Olfr417|Olfr417	7	5	0
gene-Olfr414|Olfr414	4	8	0
gene-Olfr248|Olfr248	15	8	0
gene-Grem2|Grem2	152	136	408
gene-Fh1|Fh1	3924	4855	5149
gene-Fmn2|Fmn2	535	506	2410
gene-Gm51689|Gm51689	0	0	0
gene-Opn3|Opn3	216	245	357
gene-Chml|Chml	600	939	889
gene-Kmo|Kmo	944	951	85
gene-Wdr64|Wdr64	0	0	0
gene-Gm25560	0	0	0
gene-Rgs7|Rgs7	41	43	1635
gene-Gm36360|Gm36360	0	0	0
gene-Exo1|Exo1	1390	1732	114
gene-Gm23805|Gm23805	0	0	0
gene-Olfr231|Olfr231	0	0	0
gene-Olfr424|Olfr424	0	5	0
gene-Olfr421-ps1|Olfr421-ps1	13	23	0
gene-Olfr420|Olfr420	82	97	0
gene-Gm36196|Gm36196	13	0	0
gene-Spta1|Spta1	26434	30210	770
gene-Pld5|Pld5	117	161	1685
gene-Rbm8a2	0	0	7
gene-Gm46173|Gm46173	0	0	0
gene-Cep170|Cep170	3387	3783	5680
gene-Mir350|Mir350	0	0	0
rna-NR_029775.1|Mir350	0	0	0
gene-Gm30115|Gm30115	0	0	0
gene-1700016C15Rik|1700016C15Rik	8	5	17
gene-Gm51282|Gm51282	0	0	2
rna-NR_162777.1|Gm51282	0	0	1
gene-Gm30013|Gm30013	7	0	11
gene-Zbtb18|Zbtb18	5648	6800	19054
gene-Sdccag8|Sdccag8	934	1212	759
gene-Gm15423|Gm15423	4	25	39
gene-Akt3|Akt3	3826	4630	7856
gene-Gm36904|Gm36904	0	0	19
gene-Hmga2-ps1|Hmga2-ps1	651	674	396
gene-Adss|Adss	3826	4695	3550
STRG.3092|Gm16585	4	5	0
gene-Desi2|Desi2	649	843	873
gene-Catspere2|Catspere2	24	46	763
gene-Gm25312|Gm25312	0	0	0
gene-Gm8010	0	0	58
gene-Efcab2|Efcab2	330	362	1045
STRG.3096|Gm5561	218	253	3
gene-Gm24405|Gm24405	0	0	0
gene-Gm46249|Gm46249	0	4	7
gene-Kif26b|Kif26b	209	268	2415
STRG.3098|Gm34176	12	28	4
gene-Gm46174|Gm46174	107	113	33
gene-LOC115487370|LOC115487370	24	33	25
gene-Cox20|Cox20	222	263	275
gene-Hnrnpu|Hnrnpu	20845	24576	14847
gene-Tfb2m|Tfb2m	844	993	1338
gene-Cnst|Cnst	5146	6115	6409
gene-Sccpdh|Sccpdh	1101	1350	4587
gene-Smyd3|Smyd3	970	1117	1660
gene-Gm31349|Gm31349	37	40	20
gene-Gm31668|Gm31668	0	0	0
gene-Kif28|Kif28	78	72	169
gene-Ahctf1|Ahctf1	7057	8022	5647
gene-Gm37336|Gm37336	8	0	5
gene-Cdc42bpa|Cdc42bpa	3852	4781	14864
gene-LOC108167749|LOC108167749	0	13	3
gene-Gm38331|Gm38331	6	0	0
gene-Coq8a|Coq8a	2665	3140	3377
gene-Psen2|Psen2	2610	3433	2254
gene-Gm31728|Gm31728	32	52	21
gene-Stum|Stum	96	56	278
gene-Itpkb|Itpkb	8029	9603	9055
gene-Gm39712|Gm39712	43	73	111
gene-Gm5069|Gm5069	167	221	668
gene-Lin9|Lin9	756	965	380
gene-Gm38293|Gm38293	46	59	39
gene-2900024J01Rik|2900024J01Rik	5	0	36
gene-Acbd3|Acbd3	3277	3741	3915
gene-Gm31986|Gm31986	7	0	13
gene-Parp1|Parp1	13878	15716	6238
gene-Mir6904|Mir6904	3	5	5
rna-NR_105869.1|Mir6904	2	2	2
gene-G370120E05Rik|G370120E05Rik	0	10	3
gene-Gm24836|Gm24836	0	0	0
gene-H3f3a|H3f3a	38618	44484	17040
gene-Lefty2|Lefty2	0	0	9
gene-Gm39714|Gm39714	325	423	17
gene-Gm20305	0	0	4
gene-Sde2|Sde2	2837	3235	1924
gene-Gm39715|Gm39715	56	40	25
gene-Lefty1|Lefty1	346	270	207
gene-Pycr2|Pycr2	3001	4013	2181
gene-9130409I23Rik|9130409I23Rik	0	0	0
gene-Gm39716|Gm39716	0	0	4
gene-Tmem63a|Tmem63a	5498	6842	4705
gene-Ephx1|Ephx1	3580	4060	10309
gene-Gm39718|Gm39718	0	0	0
STRG.3168|Gm8146	4	8	3
gene-Gm39717|Gm39717	0	0	3
gene-Ccdc121|Ccdc121	25	48	49
gene-Cnih3|Cnih3	0	41	151
gene-Gm16547	0	0	0
gene-Nvl|Nvl	3414	3989	3515
gene-Wdr26|Wdr26	20740	24761	8616
gene-Cnih4|Cnih4	1347	1730	2461
STRG.3182|LOC108167594	102	142	16
gene-Gm38664|Gm38664	88	83	59
STRG.3184|Rpl35a-ps2	56	58	1165
gene-Gm33669|Gm33669	0	12	0
gene-Dnah14|Dnah14	115	100	36
gene-Gm33612|Gm33612	0	0	0
STRG.3186|Gm23690	9	23	2
gene-Lbr|Lbr	19511	23254	3040
gene-Gm39719|Gm39719	0	0	2
gene-Gm33725|Gm33725	21	34	72
gene-Srp9|Srp9	2928	3609	3305
gene-Enah|Enah	5999	6811	25331
gene-Gm51706	0	0	0
gene-Gm33887|Gm33887	1196	1351	276
gene-Degs1|Degs1	4842	5783	5767
gene-1700047M11Rik|1700047M11Rik	323	285	197
gene-Fbxo28|Fbxo28	2048	2238	3558
gene-Trp53bp2|Trp53bp2	2833	3249	5650
gene-Tlr5|Tlr5	463	403	196
gene-Gm33747|Gm33747	73	103	43
gene-Fam177b|Fam177b	0	0	0
gene-Susd4|Susd4	749	954	4737
gene-LOC108167751|LOC108167751	142	244	496
gene-Gm46081	0	0	3
gene-Gm46248|Gm46248	0	0	0
gene-Capn8|Capn8	0	0	0
gene-Capn2|Capn2	7739	8754	10698
gene-Disp1|Disp1	1603	2042	1621
STRG.3224|Gm37339	5	5	8
gene-Gm33973|Gm33973	9	35	0
gene-Taf1a|Taf1a	621	563	891
gene-1700056E22Rik|1700056E22Rik	44	59	31
gene-Gm39725|Gm39725	0	0	0
gene-Hhipl2|Hhipl2	18	16	37
gene-1700112H15Rik|1700112H15Rik	0	0	0
gene-Gm34068|Gm34068	0	0	0
gene-Dusp10|Dusp10	810	1190	1003
gene-Hlx|Hlx	1270	1384	344
gene-Mtarc1|Mtarc1	133	207	32
gene-Brox|Brox	3047	3882	4922
gene-Gm34102|Gm34102	12	34	18
gene-Aida|Aida	2051	2567	2341
gene-Mia3|Mia3	5761	6369	9230
rna-NR_035502.1|Mir1981	1	2	2
gene-Mtarc2|Mtarc2	3765	4424	4676
gene-Mir1981|Mir1981	1	9	3
gene-Gm34451|Gm34451	53	81	57
gene-Gm37662|Gm37662	0	0	0
gene-Gm34797|Gm34797	8	0	0
gene-Gm34602|Gm34602	12	9	9
gene-Mark1|Mark1	719	735	3364
gene-Gm39728|Gm39728	0	0	7
gene-C130074G19Rik|C130074G19Rik	2299	2532	5405
gene-Snora36b|Snora36b	0	0	0
gene-Mir664|Mir664	0	0	0
rna-NR_035529.1|Mir664	0	0	0
gene-Gm34882|Gm34882	0	12	0
gene-Iars2|Iars2	5253	5679	4292
gene-Rab3gap2|Rab3gap2	5203	6153	5649
gene-Mir194-1|Mir194-1	2	2	0
rna-NR_029580.1|Mir194-1	2	2	0
gene-Mir215|Mir215	3	5	0
rna-NR_029908.1|Mir215	2	2	0
gene-9630028B13Rik|9630028B13Rik	13	13	187
gene-Gm2061|Gm2061	36	53	95
gene-Slc30a10|Slc30a10	821	1010	914
gene-Gm35201|Gm35201	0	0	0
gene-Lyplal1|Lyplal1	107	159	753
gene-Bpnt1|Bpnt1	1416	1587	3637
gene-Eprs|Eprs	8071	9335	8853
STRG.3280|Gm3809	5	1	3
gene-A430105J06Rik|A430105J06Rik	32	72	25
gene-Rrp15|Rrp15	795	949	559
gene-Gm26169|Gm26169	0	0	0
gene-Gm35655|Gm35655	0	4	10
gene-Tgfb2|Tgfb2	1222	1371	4303
gene-Kctd3|Kctd3	3806	4743	3923
gene-Spata17|Spata17	37	31	52
gene-Gm15509|Gm15509	0	0	0
gene-1700007P06Rik|1700007P06Rik	0	0	0
gene-Gpatch2|Gpatch2	1799	2098	1952
gene-Gm51737|Gm51737	61	32	7
gene-Kcnk2|Kcnk2	623	638	1338
gene-A430027H14Rik|A430027H14Rik	0	0	3
STRG.3317|Pdcd5-ps	320	264	537
gene-Gm39735|Gm39735	0	0	0
gene-Gm36456|Gm36456	0	0	0
gene-Gm25095|Gm25095	0	0	0
gene-Gm25269|Gm25269	0	0	0
gene-n-TNgtt3|n-TNgtt3	0	0	0
gene-Ush2a|Ush2a	100	142	171
gene-Gm36388|Gm36388	0	0	6
gene-Gm46176|Gm46176	0	0	0
gene-Esrrg|Esrrg	512	735	4073
gene-9330162B11Rik|9330162B11Rik	0	0	0
gene-Gm51738|Gm51738	0	0	0
gene-Cenpf|Cenpf	7903	8967	498
gene-Ptpn14|Ptpn14	5060	5872	6326
gene-Gm51739|Gm51739	0	0	5
gene-Gm30280	0	0	0
gene-Gm26574|Gm26574	45	46	21
gene-Prox1|Prox1	276	421	2211
gene-Prox1os|Prox1os	30	0	44
gene-Smyd2|Smyd2	2036	2363	6428
STRG.3334|Gm8407	4	5	68
gene-Rps6kc1|Rps6kc1	1748	1778	2308
gene-Gm51740|Gm51740	0	0	0
gene-Vash2|Vash2	113	132	187
gene-Angel2|Angel2	3086	3715	3149
gene-Gm31640|Gm31640	0	0	0
gene-Batf3|Batf3	39	51	38
gene-D730003I15Rik|D730003I15Rik	95	151	182
gene-Atf3|Atf3	238	298	269
gene-Flvcr1|Flvcr1	1328	1548	1276
gene-A230020J21Rik|A230020J21Rik	0	0	14
gene-Spata45|Spata45	18	8	0
gene-Tatdn3|Tatdn3	416	437	418
gene-Nsl1|Nsl1	1846	2308	157
gene-Gm32128|Gm32128	0	0	3
gene-Gm31987|Gm31987	9	0	0
gene-Gm32200|Gm32200	50	72	0
gene-Nenf|Nenf	1822	2233	3346
gene-Pacc1|Pacc1	1109	1297	627
gene-Ppp2r5a|Ppp2r5a	8858	10514	4303
STRG.3365|Rab11b-ps1	216	263	383
gene-Dtl|Dtl	3705	4438	200
gene-Ints7|Ints7	6139	7067	1533
gene-Lpgat1|Lpgat1	4750	5900	9147
gene-Gm22446|Gm22446	0	0	0
gene-Gm26203|Gm26203	0	0	4
gene-Nek2|Nek2	2217	2799	372
gene-Gm39742|Gm39742	0	0	0
gene-1700034H15Rik|1700034H15Rik	54	36	59
gene-Slc30a1|Slc30a1	907	1032	1170
STRG.3384|Gm32460	4	0	0
STRG.3385|Gm39743	73	93	82
gene-Rd3|Rd3	14	31	9
gene-1700065J18Rik|1700065J18Rik	0	0	0
rna-NR_039566.1|Mir3473c	0	1	0
gene-Traf5|Traf5	738	849	136
gene-Mir3473c|Mir3473c	1	2	0
STRG.3389|Gstp-ps	672	772	601
gene-Sertad4|Sertad4	688	1007	834
gene-Gm15867|Gm15867	37	30	26
gene-Hhat|Hhat	151	173	139
gene-Gm31011|Gm31011	0	0	2
gene-Gm22265|Gm22265	0	0	0
gene-Gm31406|Gm31406	15	16	5
gene-Gm39747|Gm39747	0	0	15
gene-Syt14|Syt14	462	550	1370
gene-Gm2367	0	0	0
gene-Gm39746|Gm39746	64	66	39
gene-Rcor3|Rcor3	1016	1386	1175
gene-Gm39745|Gm39745	0	0	0
gene-Kcnh1|Kcnh1	52	24	2291
gene-Gm10516|Gm10516	127	177	153
gene-Gm31753|Gm31753	5	0	0
gene-Utp25|Utp25	1347	1526	1135
gene-Irf6|Irf6	597	816	3034
gene-A130010J15Rik|A130010J15Rik	401	492	365
gene-Traf3ip3|Traf3ip3	2716	3011	184
gene-Camk1g|Camk1g	183	169	855
gene-Gm31870|Gm31870	0	0	4
gene-Lamb3|Lamb3	460	516	1061
gene-Gm51741|Gm51741	0	11	15
gene-Hsd11b1|Hsd11b1	1666	1981	3059
gene-G0s2|G0s2	1364	1682	2525
gene-Gm32250|Gm32250	0	0	12
gene-Cd34|Cd34	1736	2140	1288
gene-Gm16897|Gm16897	13	23	42
gene-A330023F24Rik|A330023F24Rik	716	958	2530
[truncated: 47,812 more rows]

## Sheet: XP_gene_count_matrix
gene_id	xp-1	xp-2	xp-3
XBXL10_1g1|LOC108704873	8	0	8
XBXL10_1g2|LOC108704861	3	6	31
XBXL10_1g3|dok1.L	3238	3144	1700
XBXL10_1g4|mrps26.L	1598	1347	1274
XBXL10_1g6|dqx1.L	1051	886	746
XBXL10_1g7|mmp21l.L	4	4	8
XBXL10_1g10|pcgf1.L	689	671	496
XBXL10_1g11|LOC108704863	0	0	11
XBXL10_1g18|LOC108704864	233	210	108
XBXL10_1g12|LOC108704858	4169	4022	3968
XBXL10_1g13|LOC121401503	208	216	194
XBXL10_1g14|LOC108704859	518	397	142
XBXL10_1g15|LOC121401504	70	0	108
XBXL10_1g16|mogs.L	2572	2416	1339
XBXL10_1g17|LOC121401506	4821	4331	3248
XBXL10_1g19|LOC108704856	54	69	55
XBXL10_1g20|LOC121400944	18	32	13
XBXL10_1g21|LOC108704872	8278	7930	5990
XBXL10_1g22|LOC108704855	35	22	10
XBXL10_1g23|wdr54.L	2091	2136	1140
XBXL10_1g24|LOC108704854	425	342	289
XBXL10_1g26|LOC108704853	658	640	246
XBXL10_1g25|LOC121401513	14	15	5
XBXL10_1g32|LOC108704870	2	0	0
XBXL10_1g27|nop56.L	3233	3223	3485
XBXL10_1g28|LOC121396245	17	10	11
XBXL10_1g29|LOC121396382	8	13	5
XBXL10_1g30|LOC121396381	4	4	2
XBXL10_1g31|LOC108704851	1026	1038	729
XBXL10_1g34|LOC108704868	0	0	0
XBXL10_1g36|LOC121401514	0	0	0
XBXL10_1g38|LOC121401515	0	0	6
XBXL10_1g39|LOC121401478	0	0	3
XBXL10_1g40|LOC121401516	0	0	7
XBXL10_1g41|LOC121401517	0	0	0
XBXL10_1g43|LOC121400945	0	1	4
XBXL10_1g44|LOC121401518	0	0	6
XBXL10_1g45|LOC121396297	0	0	0
XBXL10_1g46|LOC121401520	2	0	3
XBXL10_1g47|LOC121400946	0	0	0
XBXL10_1g50	0	0	0
XBXL10_1g51|LOC121401524	8	25	0
XBXL10_1g52	0	0	0
XBXL10_1g54	0	0	0
XBXL10_1g55|LOC121401480	0	0	0
STRG.42|LOC108705561	0	0	4
XBXL10_1g49|LOC121401522	0	0	4
XBXL10_1g53|LOC121401526	0	0	5
XBXL10_1g57|LOC108705124	1	0	0
XBXL10_1g59|LOC108705129	6	0	4
STRG.46|LOC121401484	11	5	4
XBXL10_1g104|LOC108704782	0	2	0
XBXL10_1g105|LOC108704781	0	3	0
XBXL10_1g106|LOC121401497	3	0	0
XBXL10_1g108|LOC108704779	0	0	7
XBXL10_1g111|LOC121401499	0	0	2
XBXL10_1g112|LOC121402012	0	0	0
XBXL10_1g114|LOC121402105	6	0	0
STRG.49|LOC121402016	4	0	4
XBXL10_1g270|LOC121401533	57	48	2
XBXL10_1g288|LOC121400402	4	2	4
XBXL10_1g290|LOC121400407	3	0	0
XBXL10_1g289|LOC121400404	3	7	20
XBXL10_1g292|LOC108705119	0	1	0
XBXL10_1g293|LOC108705116	0	0	0
XBXL10_1g294|LOC108705115	6	3	0
XBXL10_1g295|LOC121400412	0	3	6
XBXL10_1g296|LOC108705120	0	2	6
XBXL10_1g298|LOC121401535	0	0	1
XBXL10_1g299|LOC121400414	0	0	0
XBXL10_1g351|xv2r1.L	13	15	25
XBXL10_1g352	6	8	0
XBXL10_1g353|LOC108705330	8	17	53
XBXL10_1g354|LOC108705331	0	0	2
XBXL10_1g382|LOC108705018	0	0	0
XBXL10_1g384|LOC121401537	0	0	0
XBXL10_1g383|LOC121401538	1	0	4
XBXL10_1g400|LOC108719464	0	0	2
XBXL10_1g407|LOC121401544	32	23	30
XBXL10_1g403|LOC108697567	1182	1133	610
XBXL10_1g404|LOC108697566	65	87	37
XBXL10_1g405|LOC108697552	160	129	72
XBXL10_1g406|LOC121401545	14	20	11
XBXL10_1g408|LOC121401546	17	19	145
XBXL10_1g409|LOC121401548	0	7	6
XBXL10_1g410|spr.L	1627	1596	1299
XBXL10_1g411|emx1.L	3	0	0
XBXL10_1g412|sfxn5.L	322	293	190
XBXL10_1g413|rab11fip5.L	2441	2276	2079
XBXL10_1g415|LOC108719446	4	4	41
XBXL10_1g416|MGC108497.L	6	3	127
XBXL10_1g417|alms1.L	1353	1089	803
XBXL10_1g418|egr4.L	7	9	4
XBXL10_1g420|cct7.L	8684	8453	6989
XBXL10_1g419|fbxo41.L	309	256	288
XBXL10_1g421|pradc1.L	1065	1063	587
XBXL10_1g422|glod5.L	536	615	391
XBXL10_1g423|smyd5.L	1173	1146	790
XBXL10_1g424|LOC108697494	870	877	518
XBXL10_1g425|LOC108719437	0	0	4
XBXL10_1g428	0	0	0
XBXL10_1g426|LOC108719426	3	7	11
XBXL10_1g427|LOC108697487	3	2	5
XBXL10_1g429|XB22166507.L [provisonal]	564	396	337
XBXL10_1g430|pced1a.L	123	108	65
XBXL10_1g432|LOC121401558	0	0	0
XBXL10_1g433|dctn1.L	17482	16432	12127
XBXL10_1g434|LOC108697437	3	2	0
XBXL10_1g435	0	1	0
XBXL10_1g436|nat8.6.L	0	0	0
XBXL10_1g437|nat8.5.L	327	285	125
XBXL10_1g438|nat8.3.L	0	0	0
XBXL10_1g439|nat8.2.L	0	0	0
XBXL10_1g431|adam33.L	850	821	559
XBXL10_1g440|nat8.1.L	10	9	6
XBXL10_1g441|cpxm1.L	1647	1682	715
XBXL10_1g442|LOC121401565	7	18	4
XBXL10_1g444|rnf145l.L	5388	5197	3685
XBXL10_1g443|coe3l.L	535	538	922
XBXL10_1g445|gpr151.L	0	0	0
XBXL10_1g446|LOC108719395	0	2	0
XBXL10_1g447|lyrm2.L	564	614	443
XBXL10_1g448|hspa12b.L	1853	1702	1248
XBXL10_1g449|adissp.L	1974	1876	1770
XBXL10_1g450|spef1.L	77	73	107
XBXL10_1g451|LOC108697349	9	5	0
XBXL10_1g452|cdc25b.L	4284	4127	2417
XBXL10_1g453|LOC108697345	10	0	4
XBXL10_1g454|znf638.L	5940	5695	5588
XBXL10_1g455|LOC108697270	1155	1114	1797
XBXL10_1g456|LOC121401575	0	0	0
XBXL10_1g458|cyp26b1.L	3403	3411	2086
XBXL10_1g459|exoc6b.L	1604	1701	1505
XBXL10_1g460|nagk.L	1576	1540	978
XBXL10_1g461|vax2.L	4	7	11
XBXL10_1g465|tex261.L	1787	1716	1413
XBXL10_1g462|atp6v1b1.L	23	23	314
XBXL10_1g463|LOC108697247	100	124	127
XBXL10_1g464|ankrd53.L	533	535	162
XBXL10_1g466|siglec1.L	161	181	231
XBXL10_1g467|paip2b.L	2760	2668	2958
XBXL10_1g469|ddrgk1.L	1962	1764	2020
XBXL10_1g470|LOC108697204	0	0	0
XBXL10_1g471|htr7l.L	18	7	10
XBXL10_1g473|LOC121401606	3	0	0
XBXL10_1g472|slc4a11.L	1207	1086	1305
XBXL10_1g476|dnaaf9.L	139	161	169
XBXL10_1g477|atrn.L	2572	2414	1140
XBXL10_1g478|LOC108697165	16	10	21
XBXL10_1g479|gfra4.L	586	582	530
XBXL10_1g481|LOC108697143	794	805	607
XBXL10_1g482|lzts3.L	53	44	37
XBXL10_1g483|fastkd5.L	191	171	159
STRG.151|LOC108697136	641	657	602
XBXL10_1g486|oxt.L	0	0	0
XBXL10_1g487|gnrh2.L	0	0	0
XBXL10_1g488|ptpre.L	5400	5020	2494
XBXL10_1g485|avp.L	61	63	21
XBXL10_1g489|LOC108697133	1968	2031	1199
XBXL10_1g490|pank2.S	1583	1692	1257
XBXL10_1g491|rnf24.L	4505	4798	4360
XBXL10_1g492|smox.L	1232	1208	416
XBXL10_1g494|LOC108719346	0	0	0
XBXL10_1g493|LOC108697129	17	29	20
XBXL10_1g495|adra1d.L	131	159	151
XBXL10_1g496|ctnna2.L	456	498	331
XBXL10_1g497|lrrtm1.L	860	866	568
XBXL10_1g498|suclg1.L	3542	3512	4632
XBXL10_1g499|LOC121401646	0	0	0
XBXL10_1g500|LOC108719337	0	0	0
XBXL10_1g502	0	0	0
XBXL10_1g504|LOC108696231	0	0	0
XBXL10_1g505|LOC108696225	0	0	0
XBXL10_1g506|LOC121402001	0	0	0
XBXL10_1g507|LOC108719324	0	0	0
XBXL10_1g509|LOC121400502	0	0	0
XBXL10_1g514|LOC121400507	0	0	0
XBXL10_1g517|LOC121401656	0	5	0
XBXL10_1g520|LOC108696200	0	0	0
XBXL10_1g521|LOC121401948	5	2	0
XBXL10_1g523|LOC121401768	4	0	0
XBXL10_1g524|LOC121401761	0	7	0
XBXL10_1g527|LOC121401665	10	10	0
XBXL10_1g529|LOC121400509	0	0	0
XBXL10_1g530|LOC121401981	0	0	0
XBXL10_1g531|LOC121401982	0	0	0
XBXL10_1g533|LOC121401975	0	4	0
XBXL10_1g534|LOC121400512	0	0	0
XBXL10_1g535|LOC121401840	3	4	0
XBXL10_1g536|LOC121402009	0	0	0
XBXL10_1g537|LOC121401976	0	0	0
XBXL10_1g538|LOC108719307	0	0	0
XBXL10_1g540|LOC108719298	0	0	0
XBXL10_1g542|LOC121400517	2	0	0
XBXL10_1g544|LOC121401719	0	0	0
XBXL10_1g545|LOC121402008	0	0	0
XBXL10_1g546|LOC121401670	0	0	0
XBXL10_1g547|LOC121401674	0	0	0
XBXL10_1g548|LOC121401920	8	0	0
XBXL10_1g549|LOC108705726	0	0	0
XBXL10_1g550|LOC121393086	38	39	0
XBXL10_1g552|LOC108705651	0	0	0
XBXL10_1g554|LOC121401888	0	0	0
XBXL10_1g555|LOC121401745	9	8	0
XBXL10_1g556|LOC108705652	5	0	0
XBXL10_1g557|LOC121401667	0	0	0
XBXL10_1g558|LOC108705715	4	0	0
XBXL10_1g559|LOC121401672	0	3	0
XBXL10_1g561|LOC108719522	0	0	0
XBXL10_1g563|LOC121402007	0	0	0
XBXL10_1g564|LOC108697580	12	0	0
XBXL10_1g565|LOC121402010	14	22	0
XBXL10_1g503|LOC121401999	0	0	3
XBXL10_1g508|LOC121401879	5	9	85
XBXL10_1g510|LOC108696214	0	7	5
XBXL10_1g511|LOC108719316	0	0	3
XBXL10_1g512|LOC121401988	0	0	5
XBXL10_1g513|LOC121401984	0	0	13
XBXL10_1g515|LOC121401890	0	11	10
XBXL10_1g516|LOC108696206	0	0	5
XBXL10_1g518|LOC121401647	52	56	21
XBXL10_1g519|LOC121402006	0	0	12
XBXL10_1g522|LOC108696185	14	4	22
XBXL10_1g525|LOC108697125	0	0	190
XBXL10_1g526|LOC121401967	0	5	8
XBXL10_1g528|LOC121401943	7	0	5
XBXL10_1g532|LOC121401927	0	0	6
XBXL10_1g539|LOC121400514	0	0	5
XBXL10_1g541|LOC121400516	0	0	9
XBXL10_1g543|LOC121401792	0	0	6
XBXL10_1g551|LOC108697575	6	6	642
XBXL10_1g553|LOC121401680	0	0	4
XBXL10_1g560|LOC108719515	0	0	4
XBXL10_1g562|LOC108719508	0	0	3
XBXL10_1g566|rpia.L	726	773	842
XBXL10_1g567|krcc1.L	762	790	140
XBXL10_1g568|smyd1.L	86	31	1480
XBXL10_1g569|LOC108696295	0	9	0
XBXL10_1g570|thnsl2.L	1978	1849	1235
XBXL10_1g571|foxi4.1.L	0	3	2
XBXL10_1g574|LOC108697591	1075	1008	719
XBXL10_1g576|cd8a.L	7	13	0
XBXL10_1g577|rmnd5a.L	1771	1814	1721
XBXL10_1g578|rnf103.L	944	960	474
XBXL10_1g579|LOC121402011	293	214	138
XBXL10_1g580|kdm3a.L	4985	4777	2904
XBXL10_1g581|reep1.L	616	608	701
XBXL10_1g582|immt.L	9674	9033	7409
XBXL10_1g583|ptcd3.L	1557	1447	1535
XBXL10_1g584|LOC121396263	10	7	6
XBXL10_1g585|LOC121396269	17	16	6
XBXL10_1g586|LOC121396265	25	18	14
XBXL10_1g587|mrpl35.L	685	636	797
XBXL10_1g588|polr1a.L	1244	1100	879
XBXL10_1g589|st3gal5.L	1053	881	439
XBXL10_1g590|atoh8.L	490	423	190
XBXL10_1g591|fgfrl1.L	1021	1111	829
XBXL10_1g594|ctbp1.L	2946	2935	2067
XBXL10_1g595|LOC108696303	0	0	0
XBXL10_1g592|LOC121402013	4	4	17
XBXL10_1g593|spon2.L	5537	5353	3138
XBXL10_1g597|uvssa.L	722	739	440
XBXL10_1g598|nkx1-1.L	0	0	0
XBXL10_1g596|maea.L	7570	7806	6742
XBXL10_1g600|fam53a.L	1550	1314	1148
XBXL10_1g601|slbp.L	774	629	698
XBXL10_1g602|tmem129.L	530	529	292
XBXL10_1g603|tacc3.L	58	56	144
XBXL10_1g604|LOC108696317	0	0	2
XBXL10_1g605|fgfr3.L	74	83	240
XBXL10_1g606|letm1.L	886	848	716
XBXL10_1g607|nsd2.L	161	120	115
XBXL10_1g608|LOC108697715	399	438	493
XBXL10_1g613|poln.L	0	4	0
XBXL10_1g609|nelfa.L	402	460	217
XBXL10_1g610|nicol1.L	201	209	351
XBXL10_1g611|LOC121402015	41	60	46
XBXL10_1g612|nat8l.L	7	10	31
XBXL10_1g614|haus3l.L	91	47	82
XBXL10_1g615|mxd4.L	59	71	46
XBXL10_1g616|zfyve28a.L	491	488	310
XBXL10_1g617|LOC108697749	116	165	139
XBXL10_1g618|rnf4.L	190	190	141
XBXL10_1g619|fam193a.L	2314	2296	1517
XBXL10_1g620|tnip2.L	175	121	68
XBXL10_1g621|LOC121400521	0	0	0
XBXL10_1g622|sh3bp2.L	507	535	204
XBXL10_1g625|add1.L	7568	7120	4070
XBXL10_1g627|LOC108719556	0	0	0
XBXL10_1g628|LOC121401029	0	0	0
XBXL10_1g626|mfsd10.L	76	83	136
XBXL10_1g630|nop14.L	936	744	713
XBXL10_1g632|LOC121402019	6	3	8
XBXL10_1g633|LOC121402018	37	31	36
XBXL10_1g634|cgl.2.L	7	8	4
XBXL10_1g636|htt.L	8726	8530	3105
XBXL10_1g635|grk4.L	1293	1293	1108
XBXL10_1g639|rgs12.L	1622	1703	788
XBXL10_1g637|msantd1.L	133	137	106
XBXL10_1g638|LOC108697893	12	23	7
XBXL10_1g640|hgfac.L	29	21	18
XBXL10_1g641|dok7.L	29	25	71
XBXL10_1g642|lrpap1.L	9919	10238	7662
XBXL10_1g643|adra2c.L	35	19	22
XBXL10_1g644|LOC108705981	3887	3629	1708
XBXL10_1g645|LOC108697949	3346	3226	1482
XBXL10_1g646|cpz.L	24	19	177
XBXL10_1g647|gpr78.L	6	0	4
XBXL10_1g648|trmt44.L	693	667	598
XBXL10_1g649|acox3.L	200	178	120
XBXL10_1g650|htra3.L	131	103	54
XBXL10_1g651|sh3tc1.L	18	15	36
XBXL10_1g652|ablim2.L	756	693	1297
XBXL10_1g653|afap1.L	83	80	160
XBXL10_1g654|sorcs2.L	885	835	389
XBXL10_1g655|LOC121396294	0	0	0
XBXL10_1g656|LOC108698020	32	26	0
XBXL10_1g657|grpel1.L	468	480	526
XBXL10_1g658|tada2b.L	86	127	30
STRG.335|LOC108719561	6	15	8
XBXL10_1g660|tbc1d14.L	4393	4503	3645
XBXL10_1g661|KIAA0232.L	943	869	658
XBXL10_1g662|s100p.L	0	0	4
XBXL10_1g663|LOC108696360	4	0	5
XBXL10_1g665|man2b2.L	1445	1657	792
XBXL10_1g664|LOC121402073	0	0	6
XBXL10_1g667|LOC121402084	0	0	0
XBXL10_1g666|ppp2r2c.L	1054	1033	1058
XBXL10_1g668|wfs1.L	4648	4631	4640
XBXL10_1g669|jakmip1.L	2037	2141	2055
XBXL10_1g670|crmp1.L	320	337	643
XBXL10_1g671|evc.L	1150	1219	687
XBXL10_1g672|evc2.L	1128	1150	1485
XBXL10_1g673|stk32b.L	33	44	24
XBXL10_1g674|cytl1.L	4210	4426	2113
XBXL10_1g675|msx1.L	1534	1490	793
XBXL10_1g678|nsg1.L	210	227	495
XBXL10_1g677|stx18.L	414	415	399
XBXL10_1g680|lyar.L	437	408	276
XBXL10_1g679|zbtb49.L	765	876	631
XBXL10_1g681|otop1.L	7386	7841	10522
XBXL10_1g683|drd5.L	111	108	79
XBXL10_1g685|slc2a9.L	30	25	16
XBXL10_1g686|LOC121402096	0	3	0
XBXL10_1g687|wdr1.L	3786	3799	3623
XBXL10_1g689|LOC108698036	320	304	341
XBXL10_1g691|hs3st1.L	156	123	230
XBXL10_1g694|LOC121400525	6	0	0
XBXL10_1g695|bod1l1.L	341	350	239
XBXL10_1g692|LOC108698037	330	330	500
XBXL10_1g693|nkx3-2.L	4	12	51
XBXL10_1g696|LOC108698040	42	52	82
XBXL10_1g697|LOC108698041	1090	1110	932
XBXL10_1g698|c1qtnf7.L	177	170	91
XBXL10_1g701|bst1.L	142	169	49
XBXL10_1g699|cc2d2a.L	896	901	536
XBXL10_1g700|fbxl5.L	3637	3457	2920
XBXL10_1g702|cd38.L	579	631	631
XBXL10_1g704|fgfbp2.L	7	13	8
XBXL10_1g705|proml-1	599	550	464
XBXL10_1g706|tapt1.L	604	559	455
XBXL10_1g708|LOC121402129	0	0	0
XBXL10_1g707|ldb2.S	113	122	146
XBXL10_1g709|qdpr.L	973	857	715
XBXL10_1g710|clrn2.L	248	308	199
XBXL10_1g711|lap3.L	697	757	611
XBXL10_1g712|XB5964984.L [provisional]	0	3	174
XBXL10_1g713|med28.L	264	298	315
XBXL10_1g714|LOC108698044	111	133	764
XBXL10_1g715|LOC108698045	254	273	221
XBXL10_1g716|LOC108698046	18	25	42
XBXL10_1g717|LOC108719586	8	7	5
XBXL10_1g718|LOC108719589	0	6	89
XBXL10_1g719|LOC108698048	162	163	400
XBXL10_1g720|ncapg.L	64	61	67
XBXL10_1g721|LOC108698049	185	178	252
XBXL10_1g722|LOC108698051	2390	2261	1375
XBXL10_1g723|pacrgl.L	757	786	777
XBXL10_1g724|kcnip4.L	40	44	156
XBXL10_1g725|adgra3.L	1665	1641	721
XBXL10_1g726|gba3.L	99	124	161
XBXL10_1g727|ppargc1a.L	345	326	218
XBXL10_1g728|dhx15.L	2751	2842	2527
XBXL10_1g730|ccdc149.L	369	373	209
XBXL10_1g729|sod3.L	3650	3318	2243
XBXL10_1g731|lgi2.L	679	723	720
XBXL10_1g734|anapc4.L	600	514	425
XBXL10_1g732|sepsecs.L	988	821	669
XBXL10_1g733|pi4k2b.L	261	257	236
XBXL10_1g736|slc34a2.L	444	504	79
XBXL10_1g737|sel1l3.L	390	469	319
XBXL10_1g738|LOC108698057	261	228	197
XBXL10_1g739|rbpj.L	92	66	25
XBXL10_1g741|tbc1d19.L	616	580	619
XBXL10_1g742|LOC108719591	1263	1227	775
XBXL10_1g744|pcdh7.L	2365	2383	1622
XBXL10_1g746|dthd1.L	4	0	129
XBXL10_1g747|nwd2.L	18	21	12
XBXL10_1g748|LOC108698063	112	136	98
XBXL10_1g749|rell1.L	365	330	381
XBXL10_1g750|pgm2l1.L	1770	1812	1926
XBXL10_1g751|tbc1d1.L	830	705	672
XBXL10_1g752|klf3.L	972	1092	1529
XBXL10_1g753|tlr1.L	99	105	165
XBXL10_1g754|tlr6.L	134	113	235
XBXL10_1g755|fam114a1.L	1468	1549	1335
XBXL10_1g756|klhl5.L	820	709	509
XBXL10_1g757|wdr19.L	943	813	655
XBXL10_1g760|rpl9.L	47894	47161	63811
XBXL10_1g761	11	14	0
XBXL10_1g762|ugdh.L	941	904	601
XBXL10_1g758|rfc1.L	2792	2782	2163
XBXL10_1g759|klb.L	0	7	40
XBXL10_1g766|n4bp2.L	222	257	295
XBXL10_1g763|smim14.L	1591	1558	861
XBXL10_1g764|ube2k.L	1439	1366	1365
XBXL10_1g765|pds5a.L	5059	4970	2810
XBXL10_1g767|rhoh.L	0	0	37
XBXL10_1g768|chrna9.S	1907	1946	962
XBXL10_1g769|rbm47.L	1437	1326	576
XBXL10_1g771|apbb2.L	531	416	379
XBXL10_1g770|nsun7.L	0	0	26
XBXL10_1g772|uchl1.L	1661	1767	2447
XBXL10_1g773|limch1.L	11028	11375	7525
XBXL10_1g774|phox2b.L	0	0	0
XBXL10_1g776|tmem33.L	1472	1511	1625
XBXL10_1g777|slc30a9.L	891	837	803
XBXL10_1g778|bend4.L	85	49	84
XBXL10_1g779|shisa3.L	27	18	16
XBXL10_1g780|atp8a1.L	1558	1624	1820
XBXL10_1g781|grxcr1.L	134	161	157
XBXL10_1g783|kctd8.L	42	33	95
XBXL10_1g784|yipf7.L	0	0	108
XBXL10_1g786|guf1.L	787	837	378
XBXL10_1g785|gnpda2.L	1393	1402	1492
XBXL10_1g787|gabra2.L	105	94	57
XBXL10_1g788|LOC121402212	0	8	7
XBXL10_1g789|gabrb1.L	1	0	8
XBXL10_1g791|LOC121402213	329	241	161
XBXL10_1g792|LOC108698241	913	840	1424
XBXL10_1g793|corin.L	591	625	476
XBXL10_1g794|nfxl1.L	926	831	448
XBXL10_1g795|cnga1.L	4	0	7
XBXL10_1g796|nipal1.L	206	176	146
XBXL10_1g797|tec.L	1037	1029	988
XBXL10_1g798|slain2.L	750	796	836
XBXL10_1g799|slc10a4.L	0	0	3
XBXL10_1g801|fryl.L	10248	9962	9051
XBXL10_1g802|ociad1.L	1051	787	791
XBXL10_1g803|ociad2.L	384	382	386
XBXL10_1g804|sgcb.L	1740	1976	2420
XBXL10_1g805|LOC108698364	0	0	38
XBXL10_1g806|LOC108698374	30	25	19
XBXL10_1g807|LOC121396250	0	0	0
XBXL10_1g808|rasl11b.L	7625	7574	4797
XBXL10_1g809|scfd2.L	1315	1117	602
XBXL10_1g811|fip1l1.L	1162	1119	1029
XBXL10_1g812|lnx1.L	311	304	179
XBXL10_1g813|LOC108698455	259	353	343
XBXL10_1g814|gsx2.L	0	0	4
XBXL10_1g815|pdgfra.L	2543	2718	2435
XBXL10_1g816|kit.L	391	389	556
XBXL10_1g817|kdr.L	402	400	491
XBXL10_1g818|srd5a3.L	153	169	151
XBXL10_1g819|tmem165.L	1521	1390	1627
XBXL10_1g820|clock.L	1164	1043	744
XBXL10_1g822|LOC108698490	0	0	26
XBXL10_1g825|cep135.L	153	202	212
XBXL10_1g826|cracd.L	592	426	613
XBXL10_1g828|paics.2.L	3497	3506	3043
XBXL10_1g827|aasdh.L	1079	1033	758
XBXL10_1g829|paics.L	8040	7610	6286
XBXL10_1g830|ppat.L	265	271	372
XBXL10_1g831|lonrf1.L	947	1062	641
XBXL10_1g832|trmt9b.L	81	110	105
XBXL10_1g833|dlc1.L	1160	1135	610
XBXL10_1g834|LOC108698577	12	15	3
XBXL10_1g835|sgcz.L	22	42	126
XBXL10_1g836|LOC121402375	0	0	0
XBXL10_1g837|tusc3.L	526	539	706
XBXL10_1g838|LOC108719597	0	0	8
XBXL10_1g839|fgf20.L	739	695	283
XBXL10_1g841|LOC121401095	0	3	0
XBXL10_1g840|micu3.L	919	1025	753
XBXL10_1g842|zdhhc2.L	2043	2236	2426
XBXL10_1g843|LOC108696426	18	19	9
XBXL10_1g844|LOC108696408	12	0	0
XBXL10_1g845|vps37a.L	1012	1136	1173
XBXL10_1g847|LOC108696420	0	4	0
XBXL10_1g846|LOC121400544	11	26	12
XBXL10_1g848|LOC108703974	5	2	7
XBXL10_1g849|mtmr7.L	894	845	1542
XBXL10_1g850|slc7a2.L	1074	1070	896
XBXL10_1g853|LOC108719598	0	0	0
XBXL10_1g855|pcm1.L	4834	4833	4234
XBXL10_1g856|gtf2e1.2.L	41	29	0
XBXL10_1g851|pdgfrl.L	11463	11244	9696
XBXL10_1g852|mtus1.L	1629	1527	1515
XBXL10_1g854|fgl1a.L	6813	6783	4424
XBXL10_1g857|asah1.L	8193	8123	7593
XBXL10_1g858|frg1.L	533	554	928
XBXL10_1g860|LOC108719599	4974	4867	4042
XBXL10_1g861|mtnr1a.L	0	4	9
XBXL10_1g862|klkb1.L	14	0	11
XBXL10_1g863|cyp4v4	1696	1644	1630
XBXL10_1g864|cyp4v2.1.L	1149	1313	1327
XBXL10_1g865|fam149a.L	472	383	543
XBXL10_1g866|tlr3.L	437	408	313
XBXL10_1g867|sorbs2.L	1548	1611	1479
XBXL10_1g868|pdlim3.L	420	438	19185
XBXL10_1g869|cfap96.L	98	123	167
XBXL10_1g870|ufsp2.L	973	977	908
XBXL10_1g871|ankrd37.L	157	116	152
XBXL10_1g873|snx25.L	838	791	613
XBXL10_1g874|cfap97.L	376	402	441
XBXL10_1g875|slc25a4.L	0	0	16622
XBXL10_1g876|LOC108698714	5	5	23
XBXL10_1g877|helt.L	36	24	34
XBXL10_1g879|cenpu.L	730	729	707
XBXL10_1g881|LOC108698746	119	105	270
XBXL10_1g883|LOC108698755	34	11	21
XBXL10_1g884|primpol.L	35	39	38
XBXL10_1g878|acsl1.L	2168	2130	2625
STRG.668|LOC121400551	99	78	57
XBXL10_1g882|LOC108696427	0	31	8
XBXL10_1g885|casp3.2.L	193	208	279
XBXL10_1g886|irf2.L	604	657	638
XBXL10_1g887|enpp6.L	142	152	80
XBXL10_1g888|stox2.L	229	258	333
XBXL10_1g889|trappc11.L	3009	3109	1603
XBXL10_1g890|rwdd4.L	338	345	649
XBXL10_1g891|LOC108698788	29	45	1091
XBXL10_1g893|LOC108698801	175	182	115
XBXL10_1g892|ing2.L	418	421	319
XBXL10_1g894|cdkn2aip.L	223	195	202
XBXL10_1g897|wwc2.L	821	789	677
XBXL10_1g898|dctd.L	543	474	484
XBXL10_1g899|LOC108698820	3156	3126	1912
XBXL10_1g900|LOC108698837	46	76	11
XBXL10_1g903|neil3.L	150	127	125
XBXL10_1g902|aga.L	1617	1430	1703
XBXL10_1g904|vegfc.L	209	205	195
XBXL10_1g905|spcs3.L	787	854	1001
XBXL10_1g906|asb5.L	58	35	427
XBXL10_1g907|spata4.L	156	130	195
XBXL10_1g908|wdr17.L	120	177	183
XBXL10_1g909|gpm6a.L	955	1055	1224
XBXL10_1g910|glra3.L	0	0	9
XBXL10_1g911|hpgd.L	142	190	357
XBXL10_1g912|cep44.L	186	160	148
XBXL10_1g913|fbxo8.L	346	287	250
XBXL10_1g915|scrg1.L	258	200	201
XBXL10_1g916|sap30.L	545	585	602
XBXL10_1g917|hmgb2.L	7790	7974	10451
XBXL10_1g918|galnt7.L	159	166	160
XBXL10_1g919|galntl6.L	8	8	17
XBXL10_1g920|aadat.L	4	0	0
XBXL10_1g921|mfap3l.L	517	476	309
XBXL10_1g922|hpf1.L	250	216	315
XBXL10_1g923|clcn3.L	2701	2731	2310
XBXL10_1g924|nek1.L	770	746	535
XBXL10_1g925|sh3rf1.L	1026	904	466
XBXL10_1g926|cbr4.L	270	315	252
XBXL10_1g927|palld.L	5113	5117	3083
XBXL10_1g930|LOC108699095	762	692	529
XBXL10_1g928|LOC108719602	44	71	14
XBXL10_1g929|LOC108719603	1248	1266	586
XBXL10_1g931|anxa10.L	16	18	27
XBXL10_1g932|LOC108704954	4119	4047	3448
XBXL10_1g933|tll1.L	301	357	756
XBXL10_1g934|cpe.L	17186	17578	16474
XBXL10_1g935|msmo1.L	762	846	946
XBXL10_1g936|LOC108704958	397	451	236
XBXL10_1g937|tmem192.L	278	264	243
XBXL10_1g938|LOC108704959	65	63	69
XBXL10_1g939|LOC121402798	141	162	113
XBXL10_1g940|tma16.L	287	318	500
XBXL10_1g941|LOC121402799	40	46	16
XBXL10_1g942|npy5r.L	0	0	0
XBXL10_1g943|npy2r.L	0	0	4
XBXL10_1g944|naf1.L	492	484	372
XBXL10_1g946|fstl5.L	33	54	51
XBXL10_1g947|rapgef2.L	3375	3406	2747
XBXL10_1g949|fnip2.L	441	404	394
XBXL10_1g948|spmip2.L	414	421	134
XBXL10_1g950|ppid.L	744	657	994
XBXL10_1g951|etfdh.L	1591	1413	1053
XBXL10_1g952|LOC108699191	13	17	13
XBXL10_1g953|LOC121402800	0	0	9
XBXL10_1g954|rxfp1.L	0	0	8
XBXL10_1g956|tmem144.L	680	671	536
XBXL10_1g957|gask1b.L	248	227	163
XBXL10_1g958|gria2.L	668	679	1066
XBXL10_1g959|LOC121402801	53	47	51
XBXL10_1g960|glrb.L	204	242	298
XBXL10_1g961|pdgfc.L	1237	1283	899
XBXL10_1g962|ctso.L	1123	1189	1307
XBXL10_1g964|gucy1b1.L	161	172	317
XBXL10_1g965|LOC108719606	85	124	136
XBXL10_1g966|map9.L	227	200	191
XBXL10_1g967|LOC108699267	51	23	44
XBXL10_1g969|lrat.L	38	32	34
XBXL10_1g970|LOC108699284	546	499	209
XBXL10_1g971|LOC108699289	811	765	761
XBXL10_1g974|fgb.L	0	6	7
XBXL10_1g975|plrg1.L	671	724	430
XBXL10_1g976|dchs2.L	293	318	290
XBXL10_1g977|sfrp2.L	441	402	807
XBXL10_1g978|LOC108699311	901	825	811
XBXL10_1g979|LOC108699322	147	124	137
XBXL10_1g980|tmem131l.L	2171	2056	1713
XBXL10_1g981|mnd1.L	14	9	18
XBXL10_1g982|trim2.L	2065	2233	2395
XBXL10_1g983|fhdc1.L	470	535	352
XBXL10_1g984|arfip1.L	353	331	163
XBXL10_1g985|LOC108699363	20	24	83
XBXL10_1g986|LOC121402803	5	0	0
XBXL10_1g987|LOC121402802	0	0	0
XBXL10_1g988|LOC108719609	21	7	7
XBXL10_1g989|fbxw7.L	593	489	358
XBXL10_1g991|LOC121401124	4	0	0
XBXL10_1g992|gatb.L	945	959	652
XBXL10_1g993|fhip1a.L	525	582	336
XBXL10_1g994|sh3d19.L	1418	1478	916
XBXL10_1g995|rps3a.L	41346	40389	49531
XBXL10_1g996|LOC121396359	2	1	1
XBXL10_1g997|LOC121396358	4	2	1
XBXL10_1g998|lrba.L	3865	4169	2540
XBXL10_1g999|mab21l2.L	190	204	379
XBXL10_1g1000|dclk2.L	977	990	1117
XBXL10_1g1001|nr3c2.L	843	778	828
XBXL10_1g1002|arhgap10.L	950	950	939
XBXL10_1g1003|prmt9.L	642	720	463
XBXL10_1g1004|tmem184c.L	680	634	593
XBXL10_1g1005|ednra.L	1287	1253	912
XBXL10_1g1007|ttc29.L	8	36	39
XBXL10_1g1008|LOC121401131	0	0	0
XBXL10_1g1010|slc10a7.L	742	647	592
XBXL10_1g1011|LOC108719610	18	28	22
XBXL10_1g1012|lsm6.L	301	280	302
XBXL10_1g1013|znf827.L	485	513	466
XBXL10_1g1014|LOC108699458	461	530	463
XBXL10_1g1015|mmaa.L	200	229	180
XBXL10_1g1016|smad1.L	2003	2010	1814
XBXL10_1g1017|LOC121402856	16	27	7
XBXL10_1g1018|LOC121402858	2	4	2
XBXL10_1g1021|LOC121401146	0	0	0
XBXL10_1g1020|LOC121401138	7	10	5
XBXL10_1g1022|LOC108699469	0	0	0
XBXL10_1g1023|hhip.L	393	392	628
XBXL10_1g1024|anapc10.L	138	142	157
XBXL10_1g1025|abce1.L	3544	3325	2490
XBXL10_1g1029|LOC121402883	6	5	0
XBXL10_1g1026|otud4.L	929	998	618
XBXL10_1g1027|LOC121402882	123	141	111
XBXL10_1g1028|LOC108710142	19	12	5
XBXL10_1g1030|frem3.L	2041	2120	726
XBXL10_1g1031|smarca5.L	423	384	535
XBXL10_1g1033|gab1.L	1212	1243	921
XBXL10_1g1034|LOC121402890	0	0	0
XBXL10_1g1037|LOC121400575	3	7	0
XBXL10_1g1041|LOC121402896	0	0	0
XBXL10_1g1043|usp38.L	489	442	250
XBXL10_1g1035|LOC121402887	0	0	4
XBXL10_1g1036|LOC121400564	10	2	1
XBXL10_1g1038|LOC121400576	2	4	1
STRG.871|LOC108696468	137	164	79
XBXL10_1g1040|LOC121402895	8	13	2
XBXL10_1g1042|LOC121402894	27	26	10
XBXL10_1g1044|inpp4b.L	367	336	465
XBXL10_1g1045|LOC108719613	114	135	167
STRG.880|LOC108719614	55	34	39
XBXL10_1g1047|rnf150.L	522	504	308
XBXL10_1g1048|tbc1d9.L	697	647	688
XBXL10_1g1049|ucp1.L	0	0	22
XBXL10_1g1050|elmod2.L	1004	1039	1265
XBXL10_1g1051|LOC108699553	0	0	10
XBXL10_1g1053|clgn.L	214	298	335
XBXL10_1g1052|mgat4d.L	317	385	323
XBXL10_1g1054|scoc.L	1155	1206	1566
XBXL10_1g1055|LOC121401160	5	4	7
XBXL10_1g1058|LOC108699640	0	0	0
XBXL10_1g1057|LOC108699635	457	648	233
XBXL10_1g1060|mgst2.L	57	96	156
XBXL10_1g1059|LOC108699671	201	245	382
XBXL10_1g1061|setd7.L	900	935	801
XBXL10_1g1062|XB5734924.L [provisional]	179	175	95
XBXL10_1g1063|rab33b.L	265	171	74
XBXL10_1g1064|LOC108719615	18	0	0
XBXL10_1g1065|naa16.L	1045	945	1419
XBXL10_1g1066|noct.L	630	621	382
XBXL10_1g1068|mgarp.L	6092	6090	7585
XBXL10_1g1067|elf2.L	1723	1564	1353
XBXL10_1g1069|slc7a11.L	35	49	34
XBXL10_1g1071|pcdh18.L	2727	2633	1325
XBXL10_1g1072|pcdh10.L	1226	1064	526
XBXL10_1g1075|c1h4orf33.L	3	5	0
XBXL10_1g1076|sclt1.L	77	58	111
XBXL10_1g1077|jade1.L	288	233	238
XBXL10_1g1083|LOC100158321	158	215	161
XBXL10_1g1078|pgrmc2.L	1991	1859	1711
XBXL10_1g1079|larp1b.L	3816	3586	3069
XBXL10_1g1080|abhd18.L	1727	1780	675
XBXL10_1g1081|mfsd8.L	738	852	606
XBXL10_1g1082|plk4.L	86	62	88
XBXL10_1g1084|LOC108699680	130	155	124
XBXL10_1g1085|LOC108699681	4	0	24
XBXL10_1g1086|fat4.L	3777	3763	2847
XBXL10_1g1087|ankrd50.L	802	735	914
XBXL10_1g1088|spry1.L	2698	2543	1318
XBXL10_1g1089|afg2a.L	530	488	328
XBXL10_1g1090|nudt6.L	300	298	237
XBXL10_1g1091|fgf2.L	511	563	220
XBXL10_1g1092|bbs12.L	54	99	63
XBXL10_1g1093|cetn4.L	166	133	346
XBXL10_1g1094|adad1.L	9	9	0
XBXL10_1g1096|bltp1.L	8549	8664	6273
XBXL10_1g1095|LOC108710144	5	3	3
XBXL10_1g1097|LOC108719617	200	238	297
XBXL10_1g1098|bbs7.L	981	865	854
XBXL10_1g1100|ccna2.L	0	6	30
XBXL10_1g1101|exosc9.L	998	997	926
XBXL10_1g1102|anxa5.L	6940	7262	8463
XBXL10_1g1103|cyp2u1.L	876	896	572
XBXL10_1g1104|hadh.L	2297	2390	2634
XBXL10_1g1105|lef1.L	2587	2670	1159
XBXL10_1g1109|LOC108719618	0	0	0
XBXL10_1g1106|LOC121402968	2	0	2
XBXL10_1g1107|LOC121402970	0	1	3
XBXL10_1g1108|rpl34.L	40321	39453	47521
XBXL10_1g1112|LOC108705587	0	0	0
XBXL10_1g1114|LOC108705586	0	0	0
XBXL10_1g1115|ostc.L	2884	2779	3069
XBXL10_1g1113|LOC121402972	3	0	4
XBXL10_1g1116|etnppl.L	1595	1736	3998
XBXL10_1g1117|LOC108710147	36	47	149
XBXL10_1g1118|sec24b.L	1423	1463	1241
XBXL10_1g1120|trnav-uac	2	0	0
XBXL10_1g1119|mcub.L	2712	2226	3583
XBXL10_1g1121|pigy.L	191	138	203
XBXL10_1g1122|fam241a.L	210	190	233
XBXL10_1g1123|LOC121402985	0	0	0
XBXL10_1g1124|pitx2.L	0	0	52
XBXL10_1g1125|enpep.L	250	257	227
XBXL10_1g1126|LOC108710167	225	283	454
XBXL10_1g1127|egf.L	791	706	421
XBXL10_1g1129|gar1.L	2021	2111	2610
XBXL10_1g1130|LOC121403002	81	53	68
XBXL10_1g1131|LOC121403005	35	23	25
XBXL10_1g1132|cfi.L	269	289	256
XBXL10_1g1133|casp6.L	344	312	281
XBXL10_1g1134|ap1ar.L	860	993	1138
XBXL10_1g1136|alpk1.L	256	244	186
XBXL10_1g1135|tifa.L	163	162	244
XBXL10_1g1137|LOC121403011	4	2	0
XBXL10_1g1138|neurog2.L	163	121	42
XBXL10_1g1139|zgrf1.S	213	168	143
XBXL10_1g1140|larp7.L	787	804	720
XBXL10_1g1141|LOC108710290	0	0	0
XBXL10_1g1142|LOC121403019	0	0	2
XBXL10_1g1143|LOC121403020	0	0	130
XBXL10_1g1144|LOC108710308	6201	6141	5834
XBXL10_1g1145|camk2d.L	1794	1803	1657
XBXL10_1g1146|arsj.L	90	81	65
XBXL10_1g1149|ndst4.L	14	11	22
XBXL10_1g1147|ugt8.L	2122	2155	1605
XBXL10_1g1148|LOC108719619	25958	27827	23068
XBXL10_1g1150|LOC108710474	21	62	85
XBXL10_1g1151|LOC108710484	142	106	158
XBXL10_1g1152|LOC121396389	1	2	1
XBXL10_1g1153|LOC121396242	3	0	1
XBXL10_1g1154|prss12.L	232	251	263
XBXL10_1g1156|sec24d.L	1517	1281	557
XBXL10_1g1157|LOC108719620	43	53	545
XBXL10_1g1158|myoz2.L	63	39	715
XBXL10_1g1159|usp53.L	2470	2383	2709
XBXL10_1g1160|LOC121400595	4	3	1
XBXL10_1g1161|c1h4orf3.L	1151	960	685
XBXL10_1g1162|fabp2.L	3	4	7
XBXL10_1g1163|LOC108710540	123	139	292
XBXL10_1g1164|mad2l1.L	8	19	27
XBXL10_1g1167|prdm5.L	569	634	511
XBXL10_1g1168|ndnf.L	1926	1842	2800
XBXL10_1g1169|LOC121403065	0	3	7
XBXL10_1g1170|tnip3.L	16	15	16
XBXL10_1g1171|qrfpr.L	27	28	10
XBXL10_1g1172|sgms2.L	73	102	241
XBXL10_1g1173|papss1.L	2555	2768	1202
XBXL10_1g1174|dkk2.L	804	768	969
XBXL10_1g1176|aimp1.L	1270	1418	1737
XBXL10_1g1178|LOC108710635	0	0	0
XBXL10_1g1179|npnt.L	2442	2514	1521
XBXL10_1g1177|tbck.L	293	339	220
XBXL10_1g1181|ints12.L	965	1063	521
XBXL10_1g1180|gstcd.L	199	173	118
XBXL10_1g1182|arhgef38.L	630	553	325
XBXL10_1g1183|ppa1.L	1130	1198	925
XBXL10_1g1184|tet2.L	39	78	197
XBXL10_1g1186|cxxc4.L	214	234	111
XBXL10_1g1188|tacr3.L	0	4	4
XBXL10_1g1191|cenpe.L	41	51	72
XBXL10_1g1192|dpy19l1.L	383	334	272
XBXL10_1g1194|bdh2.L	791	773	866
XBXL10_1g1195|slc9b2.L	208	185	98
XBXL10_1g1196|cisd2.L	710	703	909
XBXL10_1g1197|ube2d3.L	1691	1591	1685
XBXL10_1g1198|manba.L	1046	1118	934
XBXL10_1g1199|nfkb1.L	805	807	593
XBXL10_1g1200|slc39a8.L	218	255	247
XBXL10_1g1201|LOC108710809	169	186	142
XBXL10_1g1202|LOC108719622	20	20	38
XBXL10_1g1203|ppp3ca.L	1239	1242	1854
XBXL10_1g1205|LOC121403102	79	76	21
XBXL10_1g1206|h2az1.L	373	416	514
XBXL10_1g1207|dnajb14.L	328	341	396
XBXL10_1g1208|lamtor3.L	1348	1373	1466
XBXL10_1g1209|mttp.L	41	31	20
XBXL10_1g1210|c1h4orf54.L	131	103	566
XBXL10_1g1212|dapp1.L	174	201	103
XBXL10_1g1213|LOC108710849	179	156	147
XBXL10_1g1214|MGC83376	1803	1970	387
XBXL10_1g1215|adh1b.L	17	11	20
XBXL10_1g1216|adh4.L	74	70	3765
XBXL10_1g1218|LOC108719623	0	0	7
XBXL10_1g1219|LOC121403107	77	99	66
XBXL10_1g1220|adh5.L	3016	3086	3029
XBXL10_1g1221|metap1.L	608	647	969
XBXL10_1g1222|eif4e.L	400	462	647
XBXL10_1g1223|LOC121396244	1	3	4
XBXL10_1g1224|tspan5.L	1795	1759	1440
XBXL10_1g1225|rap1gds1.L	1402	1616	1783
XBXL10_1g1226|LOC108710879	0	9	31
XBXL10_1g1227|unc5c.L	147	109	134
XBXL10_1g1228|bmpr1b.L	1129	1233	1847
XBXL10_1g1229|pdlim5.L	1279	1118	1852
XBXL10_1g1230|XB5957215.L [provisional]	0	7	12
XBXL10_1g1231|hpgds.L	2050	2001	2299
XBXL10_1g1232|LOC108710927	457	375	369
XBXL10_1g1233|atoh1.L	1063	1053	455
XBXL10_1g1234|grid2.S	84	120	60
XBXL10_1g1235|ccser1.L	363	315	390
XBXL10_1g1236|mmrn1.L	60	85	242
XBXL10_1g1238|LOC121403119	2	10	0
XBXL10_1g1237|LOC121403118	9	5	4
XBXL10_1g1239|snca.L	1083	1112	3234
XBXL10_1g1241	0	0	0
XBXL10_1g1240|gprin3.L	3	6	27
XBXL10_1g1243|fam13a.L	1286	1471	834
XBXL10_1g1244|dck.1l.L	248	310	273
XBXL10_1g1245|jchain.L	0	0	105
XBXL10_1g1246|herc3.L	912	885	711
XBXL10_1g1247|LOC121403125	19	27	26
XBXL10_1g1248|dck.1.L	154	178	157
XBXL10_1g1250|LOC108710986	0	2	0
XBXL10_1g1251|rufy3.L	2082	1943	2085
XBXL10_1g1249|mob1b.L	775	937	1308
XBXL10_1g1252|herc6.L	218	227	332
XBXL10_1g1253|ppm1k.L	1611	1436	1339
XBXL10_1g1254|abcg2.L	1663	1723	1342
XBXL10_1g1255|pkd2.L	1658	1560	1010
XBXL10_1g1256|LOC121401197	0	1	2
XBXL10_1g1257|atrxl.L	70	38	2683
XBXL10_1g1258|ibsp.L	33	26	3998
XBXL10_1g1259|LOC121403127	0	0	0
XBXL10_1g1261|dspp.L	0	0	12
XBXL10_1g1262|LOC108696526	0	0	76
XBXL10_1g1263|odam.L	0	7	6
XBXL10_1g1264|cdkl2.L	118	140	275
XBXL10_1g1265|g3bp2.L	2092	2048	1827
XBXL10_1g1266|uso1.L	3714	3689	3760
XBXL10_1g1267|LOC121403134	307	329	166
XBXL10_1g1271|rchy1.L	623	647	617
XBXL10_1g1272|LOC108711048	1008	1017	998
XBXL10_1g1273|btc.L	221	215	455
XBXL10_1g1274|areg.L	8	0	32
XBXL10_1g1275|ereg.L	0	8	46
XBXL10_1g1278|cxcl2.L	96	69	135
XBXL10_1g1279|cxcl8a.L	199	175	144
XBXL10_1g1281|cxcl8b.2.L	43	59	64
XBXL10_1g1283|rassf6.L	79	89	124
XBXL10_1g1288|LOC108711102	4231	4250	3162
XBXL10_1g1289|cox18.L	294	300	203
XBXL10_1g1290|adamts3.L	295	286	232
XBXL10_1g1291|npffr2.L	6	12	9
XBXL10_1g1293|slc4a4.L	1998	1967	1766
XBXL10_1g1295|cxcl10.L	23	42	65
XBXL10_1g1296|naaal.L	8	32	35
XBXL10_1g1297|naaa.L	2378	2455	1896
XBXL10_1g1298|ppef2.L	0	0	4
XBXL10_1g1299|nup54.L	628	572	827
XBXL10_1g1300|scarb2.L	2705	2700	2535
XBXL10_1g1301|cbm20.L	4	14	0
XBXL10_1g1302|LOC108711175	670	722	383
XBXL10_1g1303|stbd1.L	83	146	101
XBXL10_1g1304|LOC108711198	1763	1538	2044
XBXL10_1g1305|LOC121403158	14	25	10
XBXL10_1g1306|shroom3.L	1228	1266	1187
XBXL10_1g1307|sowahb.L	131	146	180
XBXL10_1g1308|septin11.L	473	1393	1237
XBXL10_1g1309|LOC121403446	0	0	9
XBXL10_1g1310|ccni.L	15770	15204	10800
XBXL10_1g1311|ccng2.L	1718	1722	1385
XBXL10_1g1314|cnot6l.L	644	753	794
XBXL10_1g1315|LOC121403519	62	51	14
XBXL10_1g1316|mrpl1.L	527	631	625
XBXL10_1g1317|fras1.L	918	892	1242
XBXL10_1g1318|anxa3.L	2078	2096	2685
XBXL10_1g1319|ptpn9l.L	1258	1308	1014
STRG.1243|LOC108719654	0	0	2
XBXL10_1g1321|LOC108719663	36	13	17
XBXL10_1g1325|slc26a1.L	0	0	0
XBXL10_1g1323|rbp4l.L	22	32	36
XBXL10_1g1324|idua.L	409	420	250
XBXL10_1g1326|prc1.2.L	66	54	64
XBXL10_1g1327|chrna6.L	186	181	207
XBXL10_1g1328|chrnb3.L	468	547	467
XBXL10_1g1329|dctn6.L	498	503	575
XBXL10_1g1330|rbpms.L	95	135	195
XBXL10_1g1331|gtf2e2.L	717	691	856
XBXL10_1g1332|saraf.L	629	692	320
XBXL10_1g1333|gsr.L	2733	2696	1605
XBXL10_1g1334|LOC108711333	505	609	468
XBXL10_1g1335|leprotl1.S	409	466	495
XBXL10_1g1336|cops4.L	1130	1301	1610
XBXL10_1g1337|prag1.L	764	830	894
XBXL10_1g1338|LOC108711356	884	938	745
XBXL10_1g1340|LOC108711362	112	131	83
XBXL10_1g1341|cenpc.L	187	165	123
XBXL10_1g1342|uba6.L	780	816	919
XBXL10_1g1343|coq2.L	215	310	103
XBXL10_1g1346|ythdc1.L	5608	5434	3454
XBXL10_1g1347|LOC108711396	7	0	5
XBXL10_1g1348|hsd17b11.L	310	348	439
XBXL10_1g1349|hpse.L	374	363	308
XBXL10_1g1350|tmem150c.L	65	45	66
XBXL10_1g1354|rasgef1b.L	119	117	98
XBXL10_1g1351|LOC121403662	4	3	11
XBXL10_1g1352|hnrnpdl.L	19778	20354	19478
XBXL10_1g1353|hnrnpd.L	6606	6572	6483
XBXL10_1g1355|ptpn13.L	4762	4916	3753
XBXL10_1g1356|aff1.L	104	135	209
XBXL10_1g1357|klhl8.L	1022	954	446
XBXL10_1g1358|LOC108711489	207	281	198
XBXL10_1g1360|mapk10.L	29	29	141
XBXL10_1g1361|arhgap24.L	212	185	323
XBXL10_1g1362|LOC108719085	2	0	6
XBXL10_1g1363|LOC121403663	21	13	12
XBXL10_1g1365|LOC108711543	1911	1849	1740
XBXL10_1g1364|LOC108711563	0	3	4
XBXL10_1g1366|cds1.L	259	233	193
XBXL10_1g1367|LOC121403664	9	6	17
XBXL10_1g1368|LOC121403665	30	19	14
XBXL10_1g1369|nkx6-1.L	767	835	377
XBXL10_1g1378|LOC121403669	4	0	0
XBXL10_1g1377|gpat3.L	650	615	524
XBXL10_1g1379|fzr1.L	1761	1616	1072
XBXL10_1g1380|LOC121403670	27	13	25
XBXL10_1g1381|LOC121403671	9	12	4
XBXL10_1g1382|LOC121403672	1809	1647	621
XBXL10_1g1383|mfhas1.L	730	680	698
XBXL10_1g1384|LOC108711659	0	0	0
XBXL10_1g1385|LOC121403673	3	0	0
XBXL10_1g1387|LOC108711745	0	20	0
XBXL10_1g1386|LOC108711752	720	703	650
XBXL10_1g1389|LOC108711672	4567	4501	2653
STRG.1338|LOC108711736	4	0	9
XBXL10_1g1390|LOC121403686	24	23	26
XBXL10_1g1391|LOC121403689	1	2	21
XBXL10_1g1393	0	0	0
XBXL10_1g1392|LOC121403692	255	210	271
XBXL10_1g1394|LOC108711796	27	8	9
XBXL10_1g1397|mettl14.L	841	898	1093
XBXL10_1g1396|ctu1.L	367	404	480
XBXL10_1g1398|LOC121403702	24	29	42
XBXL10_1g1399|LOC108711800	2090	2159	1655
XBXL10_1g1400|LOC121403741	26	23	18
XBXL10_1g1401|LOC121403742	6	4	0
XBXL10_1g1402|uhrf1.L	170	169	266
XBXL10_1g1403|LOC108711853	4275	4348	5627
XBXL10_1g1404|LOC108711999	40	42	0
XBXL10_1g1405|LOC121393159	1	0	3
XBXL10_1g1406|LOC121393161	17	21	17
XBXL10_1g1407|LOC108712047	33	48	14
XBXL10_1g1408|noa1.L	4078	4049	2406
XBXL10_1g1409|LOC121393166	7	3	4
XBXL10_1g1410|LOC108712074	1455	1410	1307
XBXL10_1g1411|rest.L	552	588	676
XBXL10_1g1412|hnrnpm.L	10718	10663	7154
XBXL10_1g1413|fbn3.L	1047	1015	1128
XBXL10_1g1414|LOC121401235	13	3	7
XBXL10_1g1416|lsm7.L	1237	1249	1140
XBXL10_1g1417|sppl2b.L	21	16	9
XBXL10_1g1418|tmprss9.L	12700	12479	5976
XBXL10_1g1419|timm13.L	596	638	924
XBXL10_1g1420|lmnb2.L	130	188	147
XBXL10_1g1421|rpl36.L	19711	19166	24213
XBXL10_1g1423|LOC108696601	0	0	0
XBXL10_1g1422|LOC108712188	6	3	268
XBXL10_1g1424|mfsd12.L	508	563	586
XBXL10_1g1425|LOC108712202	500	598	340
XBXL10_1g1426|pias4.L	1050	930	909
XBXL10_1g1427|LOC108712203	0	0	7
XBXL10_1g1428|eef2.1.L	187628	183900	173916
XBXL10_1g1429|dapk3.L	1391	1325	994
XBXL10_1g1430|atcay.L	171	177	493
XBXL10_1g1431|XB5845204.L [provisional:cplx4]	73	45	36
XBXL10_1g1433|apba3.L	969	846	1012
XBXL10_1g1434|tjp3.L	2326	2006	1357
XBXL10_1g1435|LOC108712206	714	726	992
XBXL10_1g1436|cactin.L	1352	1579	1338
XBXL10_1g1437|tbxa2r.L	77	124	127
XBXL10_1g1438|LOC121393212	2787	2873	2944
XBXL10_1g1439|hmg20b.L	372	378	484
XBXL10_1g1440|mydgf.L	1109	955	984
XBXL10_1g1441|dpp9.L	1460	1487	1068
XBXL10_1g1443|sema6b.L	232	186	332
XBXL10_1g1444|LOC121393229	15	8	8
XBXL10_1g1446|lrg1.L	0	0	0
XBXL10_1g1445|LOC121393224	25	12	6
XBXL10_1g1447|plin3.L	730	660	596
XBXL10_1g1448|hdgfl2.L	1384	1440	1349
XBXL10_1g1449|ubxn6.L	1441	1527	1201
XBXL10_1g1450|chaf1a.L	130	158	183
XBXL10_1g1451|sh3gl1.L	824	903	616
XBXL10_1g1452	0	0	0
XBXL10_1g1453|LOC108712211	1791	1896	1329
XBXL10_1g1454|fsd1.L	585	489	569
XBXL10_1g1455|shd.L	15	11	47
XBXL10_1g1456	0	4	0
XBXL10_1g1457|ankrd24.L	808	743	572
XBXL10_1g1458|LOC108712214	493	485	419
XBXL10_1g1459|b4galt1.1.L	274	211	98
XBXL10_1g1460|LOC108696053	8	13	25
XBXL10_1g1461|b4galt1.2.L	44	25	24
XBXL10_1g1462|smu1.L	595	588	334
XBXL10_1g1464|aptx.L	98	89	30
XBXL10_1g1463|dnaja1.L	1246	1511	1148
XBXL10_1g1465|LOC121393277	75	56	127
XBXL10_1g1466|kcmf1.L	1364	1516	1699
XBXL10_1g1467|slc20a2.L	2183	2459	4959
XBXL10_1g1468|LOC108712220	4761	4681	2313
XBXL10_1g1469|paqr3.L	153	139	119
XBXL10_1g1470|antxr2.L	586	648	411
XBXL10_1g1472|LOC121400661	4	1	0
XBXL10_1g1473|LOC121400662	32	30	1
XBXL10_1g1474|cfap299.L	32	27	71
XBXL10_1g1475|bmp3.L	688	807	659
XBXL10_1g1476|prkg2.L	0	13	34
XBXL10_1g1478|LOC108719845	0	0	0
XBXL10_1g1479|pomk.L	575	594	682
XBXL10_1g1480|hgsnat.L	2379	2575	1939
XBXL10_1g1477|LOC108712226	27	31	96
XBXL10_1g1481|ints10.L	593	623	568
XBXL10_1g1483|LOC108712230	0	0	0
XBXL10_1g1482|csgalnact1.L	376	333	457
XBXL10_1g1484|sh2d4a.L	559	651	868
XBXL10_1g1485|LOC108712232	22	24	121
XBXL10_1g1486|LOC121393298	138	120	100
XBXL10_1g1487|lpl.L	734	778	1091
XBXL10_1g1488|fut10.L	683	663	654
XBXL10_1g1489|LOC108712234	325	358	636
XBXL10_1g1490|LOC108712235	152	140	134
XBXL10_1g1492|LOC108712236	0	7	10
XBXL10_1g1493|ubxn8.L	198	213	193
XBXL10_1g1494|ppp2cb.L	3682	3540	3857
XBXL10_1g1495|wrn.L	2169	2301	1683
XBXL10_1g1496|purg.L	138	121	178
XBXL10_1g1497|LOC121393313	37	59	22
XBXL10_1g1499|LOC108712238	129	105	229
XBXL10_1g1498|LOC121393316	198	198	233
XBXL10_1g1501|LOC121393317	11	11	63
XBXL10_1g1502|dusp4.L	121	114	78
XBXL10_1g1503|tnks.S	1591	1547	1453
XBXL10_1g1504|LOC121393322	0	0	0
XBXL10_1g1507|LOC108705455	482	521	159
XBXL10_1g1505|LOC121393321	0	1	16
XBXL10_1g1506|LOC121393323	72	61	27
XBXL10_1g1508|ppp1r3b.L	1519	1596	1058
XBXL10_1g1509|eri1.L	1044	945	966
XBXL10_1g1510|LOC121393326	52	44	28
XBXL10_1g1511|dohh.L	1004	1113	1122
XBXL10_1g1512|LOC108696625	0	0	0
XBXL10_1g1513|nfic.L	3625	3647	4150
XBXL10_1g1514|rorb.2.L	62	121	77
XBXL10_1g1515|abhd17a.L	382	361	190
XBXL10_1g1516|rexo1.L	975	1059	981
XBXL10_1g1517|atp8b3.L	232	214	247
XBXL10_1g1518|onecut3.L	0	0	16
XBXL10_1g1519|tcf3.L	3362	3122	2314
XBXL10_1g1520|LOC108712319	2776	2621	2774
XBXL10_1g1521|LOC108712329	1125	1093	1079
XBXL10_1g1522|mex3d.L	216	225	141
XBXL10_1g1523|LOC108712370	221	163	445
XBXL10_1g1524|LOC108712381	1116	1068	1733
XBXL10_1g1525|upf1.L	5127	4833	3129
XBXL10_1g1526|LOC121393347	23	7	40
XBXL10_1g1527|arrdc2.L	757	889	1249
XBXL10_1g1530|cwf19l1.L	988	1011	912
XBXL10_1g1531|LOC121393352	0	9	0
XBXL10_1g1529|LOC108719867	1906	1835	2304
XBXL10_1g1532|gadd45b.L	59	73	40
XBXL10_1g1533|gng7.L	333	461	454
XBXL10_1g1534|LOC108712412	124	75	345
XBXL10_1g1535|slc39a3.L	315	368	329
XBXL10_1g1536|sgta.L	988	962	1217
XBXL10_1g1537|thop1.L	79	38	4
XBXL10_1g1538|LOC121393355	0	4	0
XBXL10_1g1539|LOC108712438	37	51	64
XBXL10_1g1540|LOC108719882	0	3	8
XBXL10_1g1541|XB5962940.L [provisional:ctdspl2]	23	27	24
XBXL10_1g1544|LOC108712461	0	0	0
XBXL10_1g1547|apc2.L	2352	2257	1787
XBXL10_1g1550|dazap1.L	3444	3063	1623
XBXL10_1g1542|LOC121393362	50	41	32
XBXL10_1g1543|pcsk4.L	29	29	35
XBXL10_1g1545|reep6.L	333	389	224
XBXL10_1g1546|c1h19orf25.L	665	794	656
XBXL10_1g1548|LOC108696642	14	0	5
XBXL10_1g1549|rps15.L	29816	27648	36360
XBXL10_1g1551|gamt.L	18	12	831
XBXL10_1g1552|ndufs7.L	1391	1332	2292
XBXL10_1g1553|pwwp3a.L	987	800	592
XBXL10_1g1554|LOC108712576	0	8	4
XBXL10_1g1556|efna2.L	538	601	631
XBXL10_1g1560|LOC108696040	0	0	0
XBXL10_1g1557|fam174c.L	905	945	1129
XBXL10_1g1558|LOC121393399	4	0	14
XBXL10_1g1559|cirbp.L	57916	56339	69213
XBXL10_1g1561|midn.L	2137	2144	1079
XBXL10_1g1562|atp5f1d.L	4434	4133	4012
XBXL10_1g1563|cbarp.L	116	139	282
XBXL10_1g1564|stk11.L	1278	1242	904
XBXL10_1g1565|LOC121400942	0	0	8
XBXL10_1g1566|LOC121400943	7	0	37
XBXL10_1g1567|cnn2.L	4881	5069	3581
XBXL10_1g1568|arhgap45.L	680	749	1050
XBXL10_1g1569|polr2e.L	1237	1274	1415
XBXL10_1g1570|LOC108696057	68	56	26
XBXL10_1g1571|gpx4.L	7518	7035	11816
XBXL10_1g1572|sbno2.L	1695	1751	1079
XBXL10_1g1573|tmem259.L	2032	2260	1683
XBXL10_1g1574|grin3b.L	157	152	60
XBXL10_1g1575|wdr18.L	1785	1604	1243
XBXL10_1g1576|arid3a.L	48	31	41
XBXL10_1g1581|LOC121396350	2	2	0
XBXL10_1g1580|r3hdm4.L	1690	1698	1678
XBXL10_1g1582|med16.L	1389	1461	957
XBXL10_1g1583|cfd.L	7159	6835	5328
XBXL10_1g1584|prtn3.L	17	13	3339
XBXL10_1g1585|plppr3.L	24	13	28
XBXL10_1g1586|LOC121393407	238	170	204
XBXL10_1g1589|LOC108712598	389	334	442
XBXL10_1g1591|prss57l.L	47	43	28
XBXL10_1g1587|ptbp1.L	5977	5837	5895
XBXL10_1g1588|LOC108712593	0	10	9
XBXL10_1g1590|palm.L	2098	2244	3994
XBXL10_1g1592|LOC108712617	79	63	40
XBXL10_1g1593|timm10.L	554	657	685
XBXL10_1g1595|XB5806080.L [provisional]	6	14	770
XBXL10_1g1594|LOC121393441	3	0	46
XBXL10_1g1601|trnay-gua	0	1	0
XBXL10_1g1597|LOC108712630	179	159	82
XBXL10_1g1598|LOC108712642	298	262	168
XBXL10_1g1599|ndufa7.L	1363	1211	1571
XBXL10_1g1600|rps28p9.L	9876	9699	13051
XBXL10_1g1602|kank3.L	1060	1189	703
XBXL10_1g1603|angptl4.L	996	1114	627
XBXL10_1g1604|rab11b.L	3129	3196	4325
XBXL10_1g1605|LOC108712686	1246	1233	1053
XBXL10_1g1606|rab11b.2.L	370	367	549
XBXL10_1g1607|lonp1.L	2827	2866	1319
XBXL10_1g1611|LOC108712727	9	18	16
XBXL10_1g1612|ndufa11.L	2607	2482	2571
XBXL10_1g1613|vmac.L	72	133	120
XBXL10_1g1614|caps.L	119	140	461
XBXL10_1g1615|ranbp3.L	11641	11208	8301
XBXL10_1g1616|slc1a6.L	20	30	18
XBXL10_1g1617|LOC108712762	0	0	8
XBXL10_1g1618|rfx2.L	1473	1434	1002
XBXL10_1g1619|acsbg2.L	1070	1027	1045
XBXL10_1g1620|mllt1.L	2568	2766	1416
XBXL10_1g1621|acer1.L	52	36	56
XBXL10_1g1622|anp32c.L	1101	1153	1184
XBXL10_1g1623|znf414.L	865	880	538
XBXL10_1g1624|myo1f.L	217	184	484
XBXL10_1g1625|adamts10.L	3746	3669	1851
XBXL10_1g1626|zap70.L	227	298	88
XBXL10_1g1627|LOC108712806	0	15	118
XBXL10_1g1630|LOC121393507	56	64	519
XBXL10_1g1631|lingo3.L	375	437	231
XBXL10_1g1632|oaz1.L	4821	4991	11527
XBXL10_1g1633|jsrp1.L	969	905	1918
XBXL10_1g1634|amh.L	73	100	68
XBXL10_1g1635|sf3a2.L	1336	1342	1016
XBXL10_1g1637|dot1l.L	1290	1308	10470
XBXL10_1g1636|plekhj1.L	1472	1611	1845
XBXL10_1g1638|LOC108712868	177	141	161
XBXL10_1g1639|ap3d1.L	5544	5695	5555
XBXL10_1g1640|mob3a.L	1479	1638	1915
XBXL10_1g1642|LOC121393509	0	0	0
XBXL10_1g1641|LOC121393508	5	0	37
XBXL10_1g1643|mknk2.L	2574	2594	3159
XBXL10_1g1644|btbd2.L	2434	2427	1992
XBXL10_1g1646|LOC108719971	0	0	0
XBXL10_1g1647|LOC108719980	0	0	0
XBXL10_1g1648|LOC108719988	3	12	0
XBXL10_1g1645|csnk1g2.L	1206	1102	961
XBXL10_1g1649|LOC121393510	0	0	10
XBXL10_1g1650|LOC108712891	69	60	73
XBXL10_1g1651|LOC108712908	594	553	576
STRG.1732|LOC121400681	0	6	1
XBXL10_1g1653|arhgef18.L	787	754	585
XBXL10_1g1654|enc1.2.L	254	289	297
XBXL10_1g1655|pex11g.L	215	216	91
XBXL10_1g1656|LOC108712940	89	157	216
XBXL10_1g1658|lsm4.L	1912	1735	1644
XBXL10_1g1659|jund.L	2521	2625	917
XBXL10_1g1660|XB22169526.L [provisional]	61	41	153
XBXL10_1g1661|LOC108713007	323	333	435
XBXL10_1g1662|rab3a.L	2097	2096	3178
XBXL10_1g1663|mpv17l2.L	291	296	228
XBXL10_1g1664|ifi30.L	201	164	457
XBXL10_1g1665|pik3r2.L	4150	4229	2890
XBXL10_1g1666|mast3.L	959	1138	414
XBXL10_1g1667|LOC121393511	291	247	0
XBXL10_1g1668|LOC121393104	31	35	14
XBXL10_1g1670|gna15.L	11	10	49
XBXL10_1g1671|LOC108696664	14	3	8
XBXL10_1g1672|fam32a.L	186	282	378
XBXL10_1g1673|LOC108713059	706	845	962
XBXL10_1g1674|LOC108713066	343	289	193
XBXL10_1g1675|tpm4.L	2427	2440	4423
XBXL10_1g1676|rab8a.L	768	934	1195
XBXL10_1g1677|pnhd.L	120	101	93
XBXL10_1g1679|XB5740125.L [provisional:tspan3]	198	207	138
XBXL10_1g1681|LOC108713086	11	12	20
XBXL10_1g1680|elavl1.L	570	571	721
XBXL10_1g1682|mhc1-uea.L	156	130	118
XBXL10_1g1683|pram1.L	187	161	597
XBXL10_1g1684|safb.L	10692	10384	4183
XBXL10_1g1725|crygdl.28.L	8	5	2
XBXL10_1g1729|crygdl.33.L	0	0	8
XBXL10_1g1730|LOC108713124	519	547	573
XBXL10_1g1731|mier2.L	346	358	170
XBXL10_1g1732|LOC121401337	10	6	0
XBXL10_1g1733|trnag-ucc	0	0	0
XBXL10_1g1734|trpm1.S	0	0	0
XBXL10_1g1736|c2cd4c.L	0	0	23
XBXL10_1g1737|shc2.L	274	331	367
XBXL10_1g1738|cimap1c.L	421	452	165
XBXL10_1g1739|mfsd14b.L	2363	2155	2305
XBXL10_1g1740|LOC108695244	4	5	10
XBXL10_1g1741|tpgs1.L	340	336	253
XBXL10_1g1742|cdc34.L	1217	1183	1231
XBXL10_1g1746|fgf22.L	163	144	95
XBXL10_1g1743|bsg.L	15512	15513	13195
XBXL10_1g1744|LOC108713200	636	590	970
XBXL10_1g1745|polrmt.L	1704	1698	1192
XBXL10_1g1747|rnf126.L	619	550	480
XBXL10_1g1748|fstl3.L	2589	2787	1514
XBXL10_1g1749|prss57.L	3	9	250
XBXL10_1g1750|gdf15.L	4	0	4
XBXL10_1g1751|chchd10.L	1846	1671	1399
XBXL10_1g1752|LOC108713230	510	497	346
XBXL10_1g1753|LOC108713257	57	34	112
XBXL10_1g1755|isyna1.L	26739	26340	41744
XBXL10_1g1754|ssbp4.L	1314	1370	788
XBXL10_1g1757|LOC121393530	7	4	0
XBXL10_1g1756|LOC121401340	23	30	17
XBXL10_1g1758|ell.L	1004	1085	730
XBXL10_1g1759|fkbp8.L	1501	1625	1817
XBXL10_1g1760|kxd1.L	203	253	149
XBXL10_1g1763|crlf1.L	0	0	7
XBXL10_1g1765|klhl26.L	191	169	268
XBXL10_1g1766|LOC121393593	0	1	0
XBXL10_1g1767|crtc1.L	232	241	330
XBXL10_1g1761|uba52.L	28103	26720	31586
XBXL10_1g1762|rex1bd.L	470	556	661
XBXL10_1g1764|tmem59l.L	3988	4253	5154
XBXL10_1g1768|comp.L	1219	1203	811
XBXL10_1g1770|LOC121393596	8	9	0
XBXL10_1g1771|parp14.3.L	783	821	404
XBXL10_1g1769|LOC108695267	5	0	3
XBXL10_1g1772|MGC82221	1355	1384	1560
XBXL10_1g1774|stra6l.2.L	470	519	387
XBXL10_1g1773|stra6l.L	619	775	348
XBXL10_1g1775|tdrd7.L	1530	1795	1047
XBXL10_1g1776|tmod1.L	759	719	443
XBXL10_1g1777|tstd2.L	160	147	140
XBXL10_1g1778|ncbp1.L	643	657	676
XBXL10_1g1779|xpa.L	229	272	267
XBXL10_1g1781|foxe1.L	0	5	116
XBXL10_1g1782|trmo.L	350	288	190
XBXL10_1g1783|LOC121393603	128	82	69
XBXL10_1g1784|anp32b.L	994	899	1204
XBXL10_1g1785|coro2a.L	257	283	405
XBXL10_1g1786|ecpas.L	2217	2105	2598
XBXL10_1g1787|smc2.L	257	268	240
XBXL10_1g1788|LOC121393604	23	20	14
XBXL10_1g1790|gng10.L	981	1052	476
XBXL10_1g1791|LOC108713377	20	26	35
XBXL10_1g1792|ugcg.L	352	288	216
XBXL10_1g1793|susd1.L	58	48	54
XBXL10_1g1794|ptbp3.L	2899	3076	4127
XBXL10_1g1795|LOC108713381	387	337	205
XBXL10_1g1800|palm2akap2.L	2398	2500	2211
XBXL10_1g1796|snx30.L	968	848	518
XBXL10_1g1797|LOC108713383	60	89	60
XBXL10_1g1798|LOC108713384	586	599	271
XBXL10_1g1799|slc46a2.L	6	0	47
XBXL10_1g1801|XB22169562.L (provisional)	597	680	592
XBXL10_1g1803|slc25a51.L	46	97	74
XBXL10_1g1802|dcaf10.L	812	989	758
XBXL10_1g1804|frmpd1.L	78	77	277
XBXL10_1g1805|LOC108713390	720	654	771
XBXL10_1g1806|LOC121393624	293	283	135
XBXL10_1g1807|fbxo10.L	768	927	669
XBXL10_1g1808|polr1e.L	291	351	519
XBXL10_1g1809|zbtb5.L	716	943	983
XBXL10_1g1810|grhpr.2.L	9	0	4
XBXL10_1g1811|grhpr.1.L	1005	1091	1000
XBXL10_1g1813|XB5752756.L [provisional:thap1]	78	74	72
XBXL10_1g1814|LOC108713392	790	763	320
XBXL10_1g1815|zcchc7.L	189	148	162
XBXL10_1g1816|pax5.L	0	0	31
XBXL10_1g1817|melk.L	31	38	37
XBXL10_1g1818|LOC108696791	0	0	25
XBXL10_1g1820|rnf38.L	792	625	328
XBXL10_1g1821|LOC121393653	0	5	0
XBXL10_1g1822|LOC121393655	0	3	0
XBXL10_1g1819|LOC121393652	113	80	24
XBXL10_1g1827|gne.L	1013	1131	802
XBXL10_1g1825|nans.L	1173	1174	1399
XBXL10_1g1826|clta.L	5496	5412	4720
XBXL10_1g1830|cplx1.L	1187	1337	4974
XBXL10_1g1831|LOC108696803	10	20	16
XBXL10_1g1832|LOC108713395	349	402	205
XBXL10_1g1833|LOC108695294	288	227	276
XBXL10_1g1834|LOC108713396	41	55	25
XBXL10_1g1836|LOC108705656	0	9	20
XBXL10_1g1837|LOC121393677	7	0	6
XBXL10_1g1840|dgkq.L	171	134	261
XBXL10_1g1841|LOC108713400	497	483	315
XBXL10_1g1842|cartpt.L	85	101	159
XBXL10_1g1843|LOC108713401	713	737	775
XBXL10_1g1846|fcho1.L	4143	3995	2567
XBXL10_1g1847|b3gnt3.2.L	165	172	666
XBXL10_1g1849|jak3.L	0	0	11
XBXL10_1g1850|slc5a5.L	0	4	4
XBXL10_1g1852|kcnn1.L	93	137	174
XBXL10_1g1851|ccdc124.L	1971	1933	2693
XBXL10_1g1854|ocel1.2.L	4242	4032	1736
XBXL10_1g1855|nr2f6.L	695	732	503
XBXL10_1g1857|LOC108696815	20	16	11
XBXL10_1g1856|babam1.L	673	626	720
XBXL10_1g1858|insr.L	180	125	298
XBXL10_1g1859|use1.L	384	396	459
XBXL10_1g1860|nwd1.L	8	12	49
XBXL10_1g1861|sin3b.L	597	656	764
XBXL10_1g1862|f2rl3.L	29	42	41
XBXL10_1g1863|LOC108713409	5921	5919	2428
XBXL10_1g1865|myo9b.L	2926	2765	3038
XBXL10_1g1866|LOC108713410	0	0	21
XBXL10_1g1864|haus8.L	43	31	45
XBXL10_1g1867|arl9.L	495	530	430
XBXL10_1g1868|hopx.L	1304	1359	2623
XBXL10_1g1869|LOC108713412	5	7	11
XBXL10_1g1870|spink2.L	9459	9889	13197
XBXL10_1g1871|rnf170.L	199	196	88
XBXL10_1g1872|hook3.L	802	878	887
XBXL10_1g1874	0	0	0
XBXL10_1g1873|LOC121393731	858	871	1961
XBXL10_1g1875|LOC108713414	392	319	347
XBXL10_1g1876|abhd8.L	422	384	501
XBXL10_1g1877|LOC108713415	8	7	0
XBXL10_1g1878|LOC108713416	1017	1087	873
XBXL10_1g1879|dda1	962	799	1146
XBXL10_1g1881	0	0	0
XBXL10_1g1880|ano8.L	497	476	1041
XBXL10_1g1882|LOC108713418	0	0	102
XBXL10_1g1883|LOC108713419	1351	1240	895
XBXL10_1g1884|yjefn3.L	80	50	69
XBXL10_1g1885|exosc3.L	467	372	443
XBXL10_1g1886|gatad2a.L	473	465	316
XBXL10_1g1887|mau2.L	1422	1473	1257
XBXL10_1g1888|sugp1.L	4105	3898	2491
XBXL10_1g1889|tm6sf2.L	419	370	178
XBXL10_1g1890|hapln4.L	997	1064	2331
XBXL10_1g1891|LOC108713422	1566	1530	1294
XBXL10_1g1892|LOC121393767	0	3	3
XBXL10_1g1893|LOC121393765	66	54	99
XBXL10_1g1894|tmem221.L	99	94	40
XBXL10_1g1895|LOC108713425	61	55	35
XBXL10_1g1898|armc6.L	1139	980	1040
XBXL10_1g1899|sugp2.L	1669	1572	2408
XBXL10_1g1896|tmem161a.L	714	659	589
XBXL10_1g1897|slc25a42.L	478	592	611
XBXL10_1g1900|LOC108713429	1002	923	749
XBXL10_1g1901|hsd11b1l.L	4043	4460	2636
XBXL10_1g1902|LOC108713430	97	132	98
XBXL10_1g1903|ncln.L	1244	1174	795
XBXL10_1g1904|s1pr4.L	7	0	13
XBXL10_1g1906	0	0	0
XBXL10_1g1907|tle2.L	2551	2566	1732
XBXL10_1g1905|plpp2.L	5861	6022	5622
XBXL10_1g1908|tle5.L	4855	4856	4610
XBXL10_1g1909|gna11.L	342	309	205
XBXL10_1g1910|LOC121393792	71	48	42
XBXL10_1g1911|shb.L	712	729	390
XBXL10_1g1912|aldh1b1.L	0	3	14
XBXL10_1g1913|igfbpl1.L	55	37	83
XBXL10_1g1915|LOC108713478	397	386	346
XBXL10_1g1916|thap1.L	228	237	348
XBXL10_1g1917|LOC121393796	33	25	38
XBXL10_1g1918|LOC108713489	0	0	73
XBXL10_1g1919|LOC108713500	8	10	60
XBXL10_1g1920|homer3.L	565	552	980
XBXL10_1g1921|ddx49.L	337	268	271
XBXL10_1g1922|cope.L	5269	5213	4063
XBXL10_1g1923|cers1.L	139	129	168
XBXL10_1g1924|gdf1.S	0	0	5
XBXL10_1g1925|LOC121393803	0	0	6
XBXL10_1g1926|LOC121401344	19	5	22
XBXL10_1g1928|LOC121393807	0	0	2
XBXL10_1g1929|klf2.L	3913	3629	805
XBXL10_1g1930|eps15l1.L	366	514	275
XBXL10_1g1931|c1h19orf44.L	439	445	194
XBXL10_1g1932|LOC121393814	19	24	5
XBXL10_1g1933|LOC108713575	178	171	79
XBXL10_1g1934|cherp.L	2509	2401	2024
XBXL10_1g1935|slc35e1.L	245	265	244
XBXL10_1g1936|med26.L	516	536	439
XBXL10_1g1937|smim7.L	752	982	1077
XBXL10_1g1938|tmem38a.L	0	0	3398
XBXL10_1g1939|topors.L	368	378	260
XBXL10_1g1940|LOC121393818	89	76	102
XBXL10_1g1941|ndufb6.L	1026	955	1450
XBXL10_1g1942|tmem215.L	172	209	118
XBXL10_1g1946|ptgr1.2.L	205	214	199
XBXL10_1g1945|ptgr1.L	1423	1447	1508
XBXL10_1g1947|ptgr1.3.L	33	20	74
XBXL10_1g1948|LOC108696842	19	48	77
XBXL10_1g1953|txn.L	376	333	341
XBXL10_1g1954|lpar1.L	321	443	332
XBXL10_1g1955|musk.L	7	17	191
XBXL10_1g1956|svep1.L	982	1024	2189
XBXL10_1g1957|LOC100037235	1598	1628	1962
XBXL10_1g1958|LOC108713682	10	12	57
XBXL10_1g1959|plppr1.L	12	22	96
XBXL10_1g1960|rigi.L	669	605	307
XBXL10_1g1961|aco1.L	2655	2875	2332
XBXL10_1g1962|ccdc171.S	425	474	403
XBXL10_1g1963|LOC108713726	22	17	23
XBXL10_1g1964|LOC121393836	26	41	68
XBXL10_1g1965|bnc2.L	557	651	638
XBXL10_1g1966|LOC121393842	0	0	8
XBXL10_1g1967|LOC108713754	34	35	34
XBXL10_1g1968|cntln.L	145	130	248
XBXL10_1g1969|sh3gl2.L	578	489	579
XBXL10_1g1971|adamtsl1.2.L	4590	4583	3174
XBXL10_1g1972|haus6.L	61	32	37
XBXL10_1g1973|dennd4c.L	1218	1358	1414
XBXL10_1g1978	0	0	0
XBXL10_1g1979|slc24a2.L	76	118	60
XBXL10_1g1974|plin2.L	1616	1583	1589
XBXL10_1g1975|opn3.L	0	3	4
XBXL10_1g1976|rps6.L	54909	52112	63907
XBXL10_1g1977|acer2.L	396	412	320
XBXL10_1g1980|mllt3.L	905	873	672
XBXL10_1g1981|focad.L	1706	1564	1186
XBXL10_1g1982|hacd4.S	130	131	373
XBXL10_1g1983|LOC121400709	31	26	34
XBXL10_1g1984|nipsnap3a.L	1559	1502	1548
XBXL10_1g1985|abca1.L	971	1076	3317
XBXL10_1g1986|LOC108713854	0	0	3
XBXL10_1g1987|slc44a1.L	2340	2529	2355
XBXL10_1g1988|fsd1l.L	1222	1332	1612
STRG.2126|LOC108713877	7	7	15
XBXL10_1g1990|LOC121393901	53	61	46
XBXL10_1g1991|tmem38b.L	459	508	435
XBXL10_1g1992|znf462.L	1672	1896	2395
XBXL10_1g1993|rad23b.L	2877	3014	2873
XBXL10_1g1994	0	0	0
XBXL10_1g1995|klf4.L	584	617	320
XBXL10_1g1996|mtap.L	1142	1097	1281
XBXL10_1g1997|cdkn2b.L	35	36	49
XBXL10_1g1998|dmrta1.L	0	0	8
XBXL10_1g1999|elavl2.L	108	106	85
XBXL10_1g2001|LOC121393942	0	2	0
XBXL10_1g2003|plaa.L	1954	1922	1992
XBXL10_1g2004|ift74.L	676	642	518
XBXL10_1g2002|caap1.L	598	741	956
XBXL10_1g2005|LOC108713937	14	10	15
XBXL10_1g2006|tek.L	343	274	284
XBXL10_1g2007|LOC108713948	2	5	0
XBXL10_1g2008|mob3b.L	221	238	361
XBXL10_1g2009|c1h9orf72.L	838	832	805
XBXL10_1g2012|LOC108696866	0	0	0
XBXL10_1g2014|LOC108695441	0	0	0
XBXL10_1g2015|LOC495995	0	0	0
XBXL10_1g2016|LOC108696887	0	0	0
XBXL10_1g2018|LOC108695447	0	0	0
XBXL10_1g2019|LOC108695452	0	0	0
XBXL10_1g2020|LOC108696900	0	4	0
XBXL10_1g2010|LOC108695421	0	5	5
XBXL10_1g2011|LOC108695428	0	6	9
XBXL10_1g2013|LOC108696877	30	26	22
XBXL10_1g2017|LOC108696894	0	0	4
XBXL10_1g2021|lingo2.L	896	965	808
XBXL10_1g2022|LOC121393971	33	32	15
XBXL10_1g2023|psip1.L	836	875	526
XBXL10_1g2024|snapc3.L	1093	1059	744
XBXL10_1g2025|ttc39b.L	1734	1820	2386
XBXL10_1g2026|frem1.L	4979	4939	1661
XBXL10_1g2028|zdhhc21.L	68	65	20
XBXL10_1g2030|nfib.L	4518	4749	5569
XBXL10_1g2031|mpdz.L	887	927	937
XBXL10_1g2032|LOC108714070	917	861	726
XBXL10_1g2033|tyrp1.L	761	841	729
XBXL10_1g2035|ptprd.L	3405	3452	4809
XBXL10_1g2036|LOC121394061	7	8	15
XBXL10_1g2037|kdm4c.L	293	327	382
XBXL10_1g2038|LOC108705640	71	75	15
XBXL10_1g2039|uhrf2.L	2069	2153	1672
XBXL10_1g2040|KIAA2026.L	2195	2358	1289
XBXL10_1g2041|fxn.L	213	219	301
XBXL10_1g2042|mlana.L	162	232	229
XBXL10_1g2043|ermp1.L	960	1170	923
XBXL10_1g2044|ric1.L	578	568	383
XBXL10_1g2045|pdcd1lg2.L	9	5	18
XBXL10_1g2046|cd274.L	80	72	58
XBXL10_1g2047|plgrkt.L	207	187	200
XBXL10_1g2049|jak2.L	995	1050	997
XBXL10_1g2050|rcl1.L	743	708	1070
XBXL10_1g2051|ak3.L	201	185	141
XBXL10_1g2053|spata6l.L	161	163	145
XBXL10_1g2052|cdc37l1.L	203	178	190
XBXL10_1g2054|slc1a1.L	63	69	210
XBXL10_1g2055|glis3.L	39	50	322
XBXL10_1g2056|rfx3.L	29	34	46
XBXL10_1g2059|LOC121394097	8	10	9
XBXL10_1g2061|pum3.L	839	812	1243
XBXL10_1g2058|crygbl.2.L	4	4	29
XBXL10_1g2060|LOC108714329	23	25	241
XBXL10_1g2064|vldlr.L	160	149	308
XBXL10_1g2065|smarca2.L	5219	5030	4008
XBXL10_1g2067|dmrt2l.L	0	0	220
XBXL10_1g2068|dmrt2.L	0	0	150
XBXL10_1g2072|kank1.L	4569	4812	3062
XBXL10_1g2073|dock8.L	400	421	602
XBXL10_1g2074|LOC121394130	28	7	44
XBXL10_1g2075|zng1b.L	751	791	799
XBXL10_1g2076|zng1a.L	18	8	5
XBXL10_1g2077|cyp2j2.L	7	9	0
XBXL10_1g2079|LOC108705665	38	21	5
XBXL10_1g2080|foxd4l1.2.L	34	20	7
XBXL10_1g2081|LOC108714431	287	250	219
XBXL10_1g2082|tmem252.L	7	11	5
XBXL10_1g2083|pip5k1b.L	1410	1370	1368
XBXL10_1g2084|tjp2.L	2682	2616	3705
XBXL10_1g2086|entrep1.L	2011	1973	1851
XBXL10_1g2085|LOC108714442	11713	11587	6928
XBXL10_1g2087|apba1.L	9149	9662	12741
XBXL10_1g2088|LOC121401374	0	0	1
XBXL10_1g2090|ptar1.L	1274	1050	1229
XBXL10_1g2091|LOC121394154	0	0	0
XBXL10_1g2092|mamdc2.L	395	436	458
XBXL10_1g2093|LOC108714477	7	11	0
XBXL10_1g2094|klf9.L	76	50	148
XBXL10_1g2095|trpm3.L	616	639	404
XBXL10_1g2096|cemip2.L	3097	3306	2110
XBXL10_1g2097|abhd17b.L	423	467	353
XBXL10_1g2098|c1h9orf85.L	89	96	136
XBXL10_1g2100|zfand5.L	1403	1434	1382
XBXL10_1g2101|tmc1.L	1194	1123	837
XBXL10_1g2103|aldh1a1.L	725	755	1432
XBXL10_1g2104|LOC108695524	13	17	25
XBXL10_1g2106|LOC121394162	13	13	34
XBXL10_1g2105|LOC121394159	76	110	78
XBXL10_1g2107|anxa1.1.L	10208	10882	9492
XBXL10_1g2108|anxa1.2.L	1538	1613	3120
XBXL10_1g2110|rorb.L	28	42	59
XBXL10_1g2111|trpm6.L	574	578	333
XBXL10_1g2112|LOC108714527	167	172	172
XBXL10_1g2113|LOC108714534	900	952	540
XBXL10_1g2114|nmrk1.L	974	1010	708
XBXL10_1g2115|ostf1.L	1651	1627	2044
XBXL10_1g2116|pcsk5.L	1936	2038	1466
XBXL10_1g2117|rfk.L	742	796	572
XBXL10_1g2118|gcnt1.L	820	782	568
XBXL10_1g2119|prune2.L	1142	1342	2715
XBXL10_1g2121|vps13a.L	22	28	168
XBXL10_1g2122|gna14.L	666	691	541
XBXL10_1g2123|gnaq.L	621	566	592
XBXL10_1g2124|cep78.L	349	362	292
XBXL10_1g2125|psat1.L	1377	1259	1849
XBXL10_1g2126|esg2-a	4006	3831	2263
XBXL10_1g2127|MGC83762	316	382	196
XBXL10_1g2128|rasef.L	627	571	530
XBXL10_1g2129|LOC108705424	89	83	182
XBXL10_1g2130|mrps18c.L	460	407	313
XBXL10_1g2131|gkap1.L	481	561	629
XBXL10_1g2132|c1h15orf40.L	276	269	190
XBXL10_1g2133|ubqln1.L	1985	1879	1032
XBXL10_1g2134|idnk.L	130	115	87
XBXL10_1g2135|frmd3.L	626	526	566
XBXL10_1g2136|hnrnpk.L	4194	4527	5061
XBXL10_1g2137|rmi1.L	40	14	9
XBXL10_1g2138|slc28a3.L	0	0	110
XBXL10_1g2139|ntrk2.L	975	1008	1444
XBXL10_1g2140|agtpbp1.L	1318	1334	796
XBXL10_1g2142|golm1.L	2705	2713	1059
XBXL10_1g2141|naa35.L	1262	1359	972
XBXL10_1g2143|LOC108714648	0	13	8
XBXL10_1g2144|isca1.L	633	604	484
XBXL10_1g2145|tut7.L	5080	5327	3421
XBXL10_1g2146|gas1.L	43145	41200	14450
XBXL10_1g2147|dapk1.L	1369	1383	1220
XBXL10_1g2148|ctsv.L	3993	3962	4889
XBXL10_1g2149|fbp2.L	247	202	3345
XBXL10_1g2150|fbp1.L	277	350	951
XBXL10_1g2151|aopep.S	1769	1890	1977
XBXL10_1g2152|aopep.L	23	38	10
XBXL10_1g2153|fancc.L	89	105	73
XBXL10_1g2154|ptch1.L	1309	1260	1235
XBXL10_1g2155|LOC108714703	1	3	0
XBXL10_1g2156|ercc6l2.L	271	274	252
XBXL10_1g2157|hsd17b3.L	0	0	0
XBXL10_1g2158|znf367.L	11	15	24
XBXL10_1g2159|habp4.L	911	910	1128
XBXL10_1g2160|cdc14b.L	647	670	483
XBXL10_1g2161|LOC121394239	1	8	3
XBXL10_1g2162|LOC121394243	0	0	17
XBXL10_1g2164|LOC121394244	0	0	7
XBXL10_1g2167|lrrc2.L	0	0	107
XBXL10_1g2168|LOC121394246	0	1	0
XBXL10_1g2169|LOC121394250	0	1	0
XBXL10_1g2170|sass6.L	494	485	368
XBXL10_1g2171|cntnap4.L	319	304	406
XBXL10_1g2172|mfsd14bl.L	2883	2961	3748
XBXL10_1g2173|LOC108714819	22	58	47
XBXL10_1g2174|spin1.L	634	826	523
XBXL10_1g2175|nxnl2.L	65	44	29
XBXL10_1g2176|s1pr3.L	34	30	46
XBXL10_1g2177|LOC108714850	7	10	35
XBXL10_1g2178|cks2.L	10	13	22
XBXL10_1g2179|secisbp2.L	533	576	479
XBXL10_1g2180|sema4d.L	1378	1557	1307
XBXL10_1g2181|LOC108714853	21	26	13
XBXL10_1g2182|acr.2.L	0	14	11
XBXL10_1g2183|LOC121394261	0	0	25
XBXL10_1g2184|gadd45g.L	1374	1285	834
XBXL10_1g2185|diras2.L	51	29	86
XBXL10_1g2186|syk.L	24	39	252
XBXL10_1g2187|LOC495229	873	880	1412
XBXL10_1g2188|nfil3.L	645	737	815
XBXL10_1g2189|ror2.L	723	683	432
XBXL10_1g2190|sptlc1.L	1110	1224	1434
XBXL10_1g2191|cdc42se2l.L	1008	981	794
XBXL10_1g2192|rabggta.L	1469	1415	1433
XBXL10_1g2193|tgm1.L	266	278	708
XBXL10_1g2194|LOC121394268	912	907	554
XBXL10_1g2195|nedd8.L	1004	1007	1201
XBXL10_1g2196|tm9sf1.L	1258	1179	719
XBXL10_1g2197|ipo4.L	648	754	502
XBXL10_1g2198|LOC108714858	21	30	17
XBXL10_1g2199|XB22041731.L [provisional]	44	15	8
XBXL10_1g2201|irf9.L	530	535	338
XBXL10_1g2202|LOC108714859	382	460	345
XBXL10_1g2203|LOC108714860	385	409	361
XBXL10_1g2204|psme2.L	391	438	738
XBXL10_1g2206|psme1.L	376	449	938
XBXL10_1g2205|emc9.L	425	442	361
XBXL10_1g2207|fitm1.L	7	7	133
XBXL10_1g2208|dcaf11.L	9293	8850	8673
XBXL10_1g2209|pck2.L	401	489	657
XBXL10_1g2210|cebpe.L	0	0	21
XBXL10_1g2211|slc7a8.L	6787	6584	7238
XBXL10_1g2212|rnf212b.L	5	0	4
XBXL10_1g2213|homez.L	1763	2101	2061
XBXL10_1g2214|twsg2.L	1026	1006	1011
XBXL10_1g2215|ppp1r3e.L	24	17	76
XBXL10_1g2216|bcl2l2.L	3347	2997	3358
XBXL10_1g2217|pabpn1.L	2879	2622	1128
XBXL10_1g2218|efs.L	1030	1130	850
XBXL10_1g2219|cmtm5.L	772	949	1134
XBXL10_1g2221|LOC108714868	17	9	15
XBXL10_1g2222|ngdn.L	671	587	532
XBXL10_1g2223|thtpa.L	48	53	49
XBXL10_1g2224|zfhx2.L	1621	1655	1160
XBXL10_1g2225|ap1g2.L	1846	1934	1004
XBXL10_1g2226|dhrs4.L	1248	1354	871
XBXL10_1g2227|jph4.L	181	154	184
XBXL10_1g2228|carmil3.L	904	834	1305
XBXL10_1g2229|LOC121394312	33	26	48
XBXL10_1g2230|mrpl52.L	1532	1475	1508
XBXL10_1g2231|mmp14.L	19101	18886	13102
XBXL10_1g2232|lrp10.L	365	426	227
XBXL10_1g2233|rem2.L	7	0	15
XBXL10_1g2234|rbm23.L	4973	4612	9367
XBXL10_1g2235|prmt5.L	1834	1793	1258
XBXL10_1g2237|haus4.L	113	113	109
XBXL10_1g2238|c1h14orf93.L	618	668	379
XBXL10_1g2239|psmb5.L	2416	2410	3208
XBXL10_1g2240|psmb11.L	0	0	0
XBXL10_1g2241|cdh24.L	199	234	158
XBXL10_1g2242|LOC108714877	145	99	28
XBXL10_1g2244|LOC121394321	626	598	377
XBXL10_1g2246|LOC108714878	279	229	254
XBXL10_1g2243|acin1.L	8340	8228	7202
XBXL10_1g2245|c1h14orf119.L	0	0	19
XBXL10_1g2247|nrl.L	10	0	13
XBXL10_1g2248|slc7a7.L	223	321	293
XBXL10_1g2249|oxa1l.L	2324	2301	2127
XBXL10_1g2254|LOC108714895	0	0	0
XBXL10_1g2255|LOC108714896	0	0	0
XBXL10_1g2256|LOC108714892	0	0	0
XBXL10_1g2257|LOC121394354	0	0	0
XBXL10_1g2258|LOC121394337	0	0	0
XBXL10_1g2259|LOC121394342	0	0	0
XBXL10_1g2260|LOC108714885	0	0	0
XBXL10_1g2261|LOC121394419	0	0	0
XBXL10_1g2262|LOC121394338	0	0	0
XBXL10_1g2263|LOC121394343	0	0	0
XBXL10_1g2264|LOC121394414	0	0	0
XBXL10_1g2265|LOC121400737	0	0	0
XBXL10_1g2267|LOC108714890	0	0	0
XBXL10_1g2269|LOC121394418	0	0	0
XBXL10_1g2270|LOC121400748	0	0	0
XBXL10_1g2271|LOC121400757	0	0	0
XBXL10_1g2273|LOC121400762	0	0	0
XBXL10_1g2274|LOC108714897	0	0	0
XBXL10_1g2275|LOC121400768	0	0	0
XBXL10_1g2276|LOC121400770	0	0	0
XBXL10_1g2277|LOC108714898	0	0	0
XBXL10_1g2278|LOC121394406	0	0	0
XBXL10_1g2279|LOC121394411	0	0	0
XBXL10_1g2280|LOC121394412	0	0	0
XBXL10_1g2281|LOC121394420	0	0	0
XBXL10_1g2282|LOC121400772	0	0	0
XBXL10_1g2284|LOC108695596	0	0	0
XBXL10_1g2285|LOC108695599	0	0	0
XBXL10_1g2287|LOC108695610	0	0	0
XBXL10_1g2288|LOC121394344	0	0	0
XBXL10_1g2289|LOC108695611	0	0	0
XBXL10_1g2290|LOC108695612	0	0	0
XBXL10_1g2291|LOC121394401	0	0	0
XBXL10_1g2292|LOC121400784	0	0	0
XBXL10_1g2293|LOC121394415	0	0	0
XBXL10_1g2294|LOC108695613	0	0	0
XBXL10_1g2295|LOC121394395	0	0	0
XBXL10_1g2298|LOC121400791	0	0	0
XBXL10_1g2299|LOC108695616	0	0	0
XBXL10_1g2300|LOC121400794	0	0	0
XBXL10_1g2301|LOC108696923	0	0	0
XBXL10_1g2302|LOC121400797	0	0	0
XBXL10_1g2303|LOC108695617	0	0	0
XBXL10_1g2304|LOC108695618	0	0	0
XBXL10_1g2305|LOC108696939	0	0	0
XBXL10_1g2306|LOC121400802	0	0	0
XBXL10_1g2307|LOC121400806	0	0	0
XBXL10_1g2308|LOC108696951	0	0	0
XBXL10_1g2309|LOC121393087	0	0	0
XBXL10_1g2311|LOC108714889	0	0	0
XBXL10_1g2312|LOC108714886	0	0	0
XBXL10_1g2313|LOC108714893	0	0	0
XBXL10_1g2314|LOC121400819	0	0	0
XBXL10_1g2315|LOC121400834	0	0	0
XBXL10_1g2316|LOC108714888	0	0	0
XBXL10_1g2251|LOC108714883	4	0	164
XBXL10_1g2252|LOC101027262	35	37	300
XBXL10_1g2253|LOC108714884	34	51	2515
XBXL10_1g2266|LOC121394416	0	0	7
XBXL10_1g2268|LOC121394388	0	0	2
XBXL10_1g2272|LOC121394417	0	0	7
XBXL10_1g2283|LOC121394372	0	0	7
XBXL10_1g2286|LOC121394413	0	0	11
XBXL10_1g2296|LOC108714900	0	0	2
XBXL10_1g2297|LOC108695614	0	3	4
XBXL10_1g2310|LOC121394422	0	0	20
XBXL10_1g2320|LOC121394421	0	0	0
XBXL10_1g2326|LOC108695623	0	0	0
XBXL10_1g2327|abhd4.L	993	934	962
XBXL10_1g2328|dad1.L	1049	1135	1027
XBXL10_1g2329|trac.L	3	9	20
XBXL10_1g2330|LOC121394431	0	0	3
XBXL10_1g2334|LOC121394437	18	8	29
XBXL10_1g2371|LOC108714907	0	3	40
XBXL10_1g2381|LOC121400924	6	0	0
XBXL10_1g2382|LOC121394442	25	14	4
XBXL10_1g2385|LOC108695630	0	0	0
XBXL10_1g2386|LOC108696994	0	0	0
XBXL10_1g2387|LOC121394446	0	0	0
XBXL10_1g2388|LOC108714908	0	0	0
XBXL10_1g2390|LOC121394447	0	0	0
XBXL10_1g2389|LOC108695632	8	0	19
XBXL10_1g2391|sall2.L	639	611	465
XBXL10_1g2393|tox4.L	975	1019	717
XBXL10_1g2392|mettl3.L	980	874	856
XBXL10_1g2394|rab2b.L	1116	1376	1742
XBXL10_1g2395|chd8.L	2555	2357	1640
XBXL10_1g2396|supt16h.L	3766	3651	2386
XBXL10_1g2397|rpgrip1.L	54	38	31
XBXL10_1g2403|LOC108714979	4	11	51
XBXL10_1g2404|LOC108714969	337	259	250
XBXL10_1g2405|LOC108695633	17	28	65
XBXL10_1g2409|LOC108714986	0	0	3
XBXL10_1g2410|ltb4r.L	0	0	65
XBXL10_1g2411|nfatc4.L	359	257	228
XBXL10_1g2412|ripk3.L	478	385	403
XBXL10_1g2413|adcy4.L	4400	4388	2581
XBXL10_1g2414|LOC108715050	1950	1822	859
XBXL10_1g2415|LOC108715073	97	58	57
XBXL10_1g2416|khnyn.L	365	335	246
XBXL10_1g2417|pnp.L	1259	1147	1458
XBXL10_1g2424|dnaja4.1.L	2516	2663	2027
XBXL10_1g2428|LOC108715080	232	138	193
XBXL10_1g2429|LOC121396262	0	0	4
XBXL10_1g2430|ccnb1ip1.L	8	3	4
XBXL10_1g2431|ttc5.L	784	795	684
XBXL10_1g2432|XB5802829.L [provisional]	43	41	47
XBXL10_1g2433|lpcat4.L	2073	1780	1626
XBXL10_1g2434|LOC108715140	685	679	508
XBXL10_1g2435|slc12a4.L	3156	3036	2439
XBXL10_1g2438|LOC121394449	29	14	10
XBXL10_1g2436|emc4.L	1955	1853	2039
XBXL10_1g2437|mettl17.L	1096	1043	526
XBXL10_1g2439|pip4p1.L	839	798	774
XBXL10_1g2440|osgep.L	1029	979	1000
XBXL10_1g2441|apex1.L	850	947	1297
XBXL10_1g2461|slc39a2.L	0	0	4
XBXL10_1g2463|parp2.L	441	523	566
XBXL10_1g2462|LOC108697083	73	68	55
XBXL10_1g2464|tep1.L	4682	4786	3242
XBXL10_1g2465|hnrnpc.L	3317	3347	2905
XBXL10_1g2466|LOC108695651	0	0	0
XBXL10_1g2467|LOC121394459	0	0	9
XBXL10_1g2468|ndrg2.L	23067	23784	27247
XBXL10_1g2469|LOC108715223	192	208	283
XBXL10_1g2470|arhgef40.L	2308	2274	2031
XBXL10_1g2471|znf219.L	3788	3678	2498
XBXL10_1g2472|aplnr.L	170	180	181
XBXL10_1g2473|LOC121394475	21	30	8
XBXL10_1g2474|LOC108715257	453	451	623
XBXL10_1g2475|morc2.L	761	851	550
XBXL10_1g2476|LOC121394493	88	54	67
STRG.2586|LOC121394489	2	5	4
XBXL10_1g2479|LOC108715287	13	7	16
XBXL10_1g2478|smtn.L	799	963	2488
XBXL10_1g2480|selenom.L	4782	4787	4493
XBXL10_1g2484|LOC121394515	0	4	0
XBXL10_1g2486|LOC108715302	368	403	289
XBXL10_1g2481|inpp5j.L	337	398	180
XBXL10_1g2482|LOC121394514	20	17	15
XBXL10_1g2483|LOC121394513	38	57	96
XBXL10_1g2485|p2rx2.L	129	91	66
XBXL10_1g2487|pole.L	212	231	296
XBXL10_1g2488|pxmp2.L	449	505	569
XBXL10_1g2489|pes1.L	1567	1754	2000
XBXL10_1g2490|gal3st1.L	1053	1209	851
XBXL10_1g2491|LOC108715337	537	528	514
XBXL10_1g2492|mtfp1.L	1082	1016	1569
XBXL10_1g2493|sec14l3.L	362	358	542
XBXL10_1g2494|LOC108715346	280	242	165
XBXL10_1g2495|sf3a1.L	7152	7097	5250
XBXL10_1g2496|tbc1d10a.L	2771	2576	2061
XBXL10_1g2497|castor1.L	325	345	296
XBXL10_1g2498|LOC108697094	4	6	9
XBXL10_1g2499|lif.L	4	8	8
XBXL10_1g2500|MGC107841.L	1702	1518	921
XBXL10_1g2501|mtmr3.L	964	958	687
XBXL10_1g2502|LOC108715375	255	251	96
XBXL10_1g2504|zmat5.L	980	939	903
XBXL10_1g2505|cabp7.L	42	30	39
XBXL10_1g2506|nf2.L	732	834	878
XBXL10_1g2507|nipsnap1.L	870	711	758
XBXL10_1g2509|thoc5.L	695	705	753
XBXL10_1g2510|ap1b1.L	2283	2358	1508
XBXL10_1g2511|rasl10a.L	155	149	230
XBXL10_1g2512|gas2l1.L	773	758	338
XBXL10_1g2508|nefh.L	4926	4737	10852
XBXL10_1g2514|rhbdd3.L	997	926	810
XBXL10_1g2513|ewsr1.S	14733	13808	7787
XBXL10_1g2515|emid1.L	2868	3098	3246
XBXL10_1g2516|dtx1.L	79	110	72
XBXL10_1g2517|rasal1.L	340	349	292
XBXL10_1g2520|ddx54.L	1781	1682	1729
XBXL10_1g2521|rita1.L	532	576	418
XBXL10_1g2523|tpcn1.L	3088	3000	2128
XBXL10_1g2522|iqcd.L	208	236	225
XBXL10_1g2524|med13l.L	3744	3655	2166
XBXL10_1g2525|MGC75582.L	1	0	15291
XBXL10_1g2526|tbx3.L	4532	4528	1659
XBXL10_1g2529|rbm19.L	1365	1228	813
XBXL10_1g2533|sds.L	13	7	26
XBXL10_1g2534|plbd2.L	6779	6590	5059
XBXL10_1g2535|slc8b1.L	189	188	125
XBXL10_1g2536|ficd.L	408	439	339
XBXL10_1g2537|sart3.L	967	1081	901
XBXL10_1g2538|ung.L	366	368	341
XBXL10_1g2539|usp30.L	201	228	92
XBXL10_1g2540|svop.L	247	282	515
XBXL10_1g2541|dao.L	92	59	59
XBXL10_1g2542|ssh1.L	922	939	918
XBXL10_1g2543|coro1c.L	3350	3379	3067
XBXL10_1g2544|LOC108715593	179	117	291
XBXL10_1g2545|tmem119.L	1721	1780	1810
XBXL10_1g2546|iscu.L	2496	2845	3142
XBXL10_1g2547|LOC121394586	36	33	56
XBXL10_1g2548|acacb.S	5908	5964	5858
XBXL10_1g2549|foxn4.L	121	122	75
XBXL10_1g2550|myo1h.L	722	762	833
XBXL10_1g2551|kctd10.L	1001	953	913
XBXL10_1g2552|ube3b.L	261	177	113
XBXL10_1g2553|aldh3b1.L	0	0	8
XBXL10_1g2554|mmab.L	814	658	688
XBXL10_1g2555|mvk.L	1157	1130	869
XBXL10_1g2557|fam222a.L	1112	1248	912
XBXL10_1g2558|trpv4.L	288	203	163
XBXL10_1g2561|tchp.L	1015	1181	888
XBXL10_1g2559|LOC494858	4898	4880	2783
XBXL10_1g2560|gltp.L	1173	1210	1449
XBXL10_1g2562|git2.L	1802	1640	2172
XBXL10_1g2563|ankrd13a.L	228	284	115
XBXL10_1g2564|LOC108715669	586	553	673
XBXL10_1g2566|LOC108715673	21	21	66
XBXL10_1g2567|lhfpl7.L	18	9	43
XBXL10_1g2568|LOC108715698	2464	2726	5601
XBXL10_1g2569|crybb3.L	0	3	0
XBXL10_1g2571|LOC108715724	253	270	260
XBXL10_1g2572|LOC108715734	0	5	2425
XBXL10_1g2573|sez6l.L	634	581	567
XBXL10_1g2574|asphd2.L	1002	1156	881
XBXL10_1g2576|hps4.L	572	618	319
XBXL10_1g2577|srrd.L	240	280	159
XBXL10_1g2575|XB5848002.L [provisional]	19	13	61
XBXL10_1g2578|LOC108715794	290	253	262
XBXL10_1g2579|tpst2.L	311	297	361
XBXL10_1g2580|crybb1.L	10	0	4
XBXL10_1g2581|LOC108715803	380	298	384
XBXL10_1g2582|LOC121394659	43	47	8
XBXL10_1g2583|LOC108715811	512	481	605
XBXL10_1g2585|LOC108695653	0	0	0
XBXL10_1g2586|LOC108695654	0	0	0
XBXL10_1g2587|LOC121400932	0	0	0
XBXL10_1g2588|LOC121401424	0	0	0
XBXL10_1g2589|LOC108695656	0	0	0
XBXL10_1g2590|LOC108695657	0	0	0
XBXL10_1g2584|LOC108715827	57	46	727
XBXL10_1g2592|mn1.L	1177	1143	787
XBXL10_1g2593|pitpnb.2.L	822	821	1801
XBXL10_1g2595|LOC108715847	1219	1327	1462
XBXL10_1g2596|slc2a7.L	18	4	8
XBXL10_1g2597|chek2.L	100	71	110
XBXL10_1g2598|hscb.L	427	440	667
XBXL10_1g2599|lrrc74b.L	0	0	73
XBXL10_1g2600|slc7a4.L	246	263	356
XBXL10_1g2601|LOC108715897	455	401	272
XBXL10_1g2602|prodh.L	772	764	638
XBXL10_1g2603|rtn4r.L	24	9	41
XBXL10_1g2604|tmem233.L	0	4	184
XBXL10_1g2605|prkab1.L	579	563	708
XBXL10_1g2606|LOC121394688	59	29	12
XBXL10_1g2607|cit.L	404	386	499
XBXL10_1g2608|bicdl1.L	1449	1292	917
XBXL10_1g2609|rab35l.L	1233	1241	1312
XBXL10_1g2610|gcn1.L	4242	4323	2953
XBXL10_1g2611|rplp0.L	105600	103568	120662
XBXL10_1g2612|pxn.L	2643	2666	2183
XBXL10_1g2613|LOC108716014	12	21	21
XBXL10_1g2620|hsd11b1l.2.L	109	134	47
XBXL10_1g2621|pla2g1b.L	0	7	0
XBXL10_1g2622|msi1.L	6636	6391	4470
XBXL10_1g2627|LOC121394720	1	0	0
XBXL10_1g2623|cox6a1.L	6578	6413	5293
XBXL10_1g2624|triap1.L	1133	931	1214
XBXL10_1g2625|gatc.L	223	234	209
XBXL10_1g2626|srsf9.L	3010	2791	1975
XBXL10_1g2628|dynll1.L	4216	4063	3278
XBXL10_1g2629|coq5.L	676	640	797
XBXL10_1g2630|rnf10.L	6406	6806	7058
XBXL10_1g2631|LOC108716019	21	14	49
XBXL10_1g2632|pop5.L	180	178	194
XBXL10_1g2633|cabp1.L	2141	2098	2108
XBXL10_1g2634|mlec.L	1101	986	919
XBXL10_1g2636|unc119b.L	316	385	286
XBXL10_1g2637|acads.L	1925	2011	1498
XBXL10_1g2638|sppl3.L	3195	3478	2922
XBXL10_1g2639|hnf1a.L	11	6	6
XBXL10_1g2640|c1h12orf43.L	149	204	127
XBXL10_1g2641|rnf185.L	975	914	751
XBXL10_1g2642|limk2.L	547	583	450
XBXL10_1g2644|patz1.L	501	617	337
XBXL10_1g2646|eif4enif1.L	3753	3795	2499
XBXL10_1g2647|sfi1.L	479	525	315
XBXL10_1g2643|pik3ip1.L	1661	1695	1831
XBXL10_1g2645|drg1.L	851	962	929
XBXL10_1g2648|pisd.L	1131	1228	2247
XBXL10_1g2649|sxph.L	124	139	136
[truncated: 42,479 more rows]
