# Supplementary material for: Single-cell atlas comparison across vertebrates reveals evolution of auditory cell types and mechanisms for hair cell regeneration
Source: Research Square preprint supplement (doi:10.21203/rs.3.rs-4508608/v1), 2024-06-28
Supplement: Supplementary file 3 [file c4567fd9570d0abc05b48b0c.xlsx]

## Sheet: 10858GG-vs-XP.all
id	GG1	GG2	XP1	XP2	GG1_CPM	GG2_CPM	XP1_CPM	XP2_CPM	GG_mean	XP_mean	log2(fc)	PValue	FDR
CYP26B1	776	824	3403	3411	16.33	16.32	141.32	144.32	16.325	142.82	3.129	0	0
RNF24	915	954	4505	4798	19.26	18.9	187.09	203.01	19.08	195.05	3.3537	0	0
SPON2	690	887	5537	5353	14.52	17.57	229.95	226.49	16.045	228.22	3.8302	0	0
OTOP1	2929	3340	7386	7841	61.64	66.16	306.73	331.76	63.9	319.245	2.3208	0	0
RPL9	35678	36469	47894	47161	750.83	722.35	1989	1995.4	736.59	1992.2	1.4354	0	0
PDGFRL	1303	1311	11463	11244	27.42	25.97	476.05	475.74	26.695	475.895	4.156	0	0
HMGB2	1416	1451	7790	7974	29.8	28.74	323.51	337.38	29.27	330.445	3.4969	0	0
CPE	2657	2866	17186	17578	55.92	56.77	713.72	743.73	56.345	728.725	3.693	0	0
RPL34	12272	12770	40321	39453	258.26	252.94	1674.5	1669.28	255.6	1671.89	2.7095	0	0
GAR1	289	332	2021	2111	6.08	6.58	83.93	89.32	6.33	86.625	3.7745	0	0
HNRNPDL	19012	20668	19778	20354	400.1	409.38	821.36	861.19	404.74	841.275	1.0556	0	0
AFF1	8599	9159	104	135	180.96	181.41	4.32	5.71	181.185	5.015	-5.1751	0	0
TMPRSS9	9097	9322	12700	12479	191.44	184.64	527.42	527.99	188.04	527.705	1.4887	0	0
RPL36	11094	11662	19711	19166	233.47	230.99	818.58	810.92	232.23	814.75	1.8108	0	0
EEF2	140144	145315	187628	183900	2949.27	2878.29	7792.02	7780.9	2913.78	7786.46	1.4181	0	0
CNN2	1671	1810	4881	5069	35.17	35.85	202.7	214.47	35.51	208.585	2.5543	0	0
RANBP3	3872	4430	11641	11208	81.48	87.75	483.44	474.22	84.615	478.83	2.5005	0	0
ADAMTS10	1227	1201	3746	3669	25.82	23.79	155.57	155.24	24.805	155.405	2.6473	0	0
IFI30	13708	13887	201	164	288.48	275.06	8.35	6.94	281.77	7.645	-5.2039	0	0
SAFB	7200	7682	10692	10384	151.52	152.16	444.03	439.35	151.84	441.69	1.5405	0	0
CRTC1	9725	10613	232	241	204.66	210.21	9.63	10.2	207.435	9.915	-4.3869	0	0
UBA52	15441	16205	28103	26720	324.95	320.98	1167.09	1130.54	322.965	1148.82	1.8307	0	0
TMEM59L	593	563	3988	4253	12.48	11.15	165.62	179.95	11.815	172.785	3.8703	0	0
CERS1	8909	9438	139	129	187.49	186.94	5.77	5.46	187.215	5.615	-5.0593	0	0
RPS6	45448	49890	54909	52112	956.43	988.18	2280.32	2204.88	972.305	2242.6	1.2057	0	0
PTPRD	941	984	3405	3452	19.8	19.49	141.41	146.06	19.645	143.735	2.8712	0	0
ANXA1	1291	1507	10208	10882	27.17	29.85	423.93	460.42	28.51	442.175	3.9551	0	0
GAS1	3745	3776	43145	41200	78.81	74.79	1791.77	1743.19	76.8	1767.48	4.5244	0	0
DCAF11	3467	3245	9293	8850	72.96	64.27	385.93	374.45	68.615	380.19	2.4701	0	0
TEP1	191	251	4682	4786	4.02	4.97	194.44	202.5	4.495	198.47	5.4645	0	0
EWSR1	8825	9072	14733	13808	185.72	179.69	611.85	584.22	182.705	598.035	1.7107	0	0
EMID1	202	287	2868	3098	4.25	5.68	119.11	131.08	4.965	125.095	4.6551	0	0
ACACB	918	910	5908	5964	19.32	18.02	245.35	252.34	18.67	248.845	3.7365	0	0
RPLP0	44416	46529	105600	103568	934.71	921.61	4385.47	4382.01	928.16	4383.74	2.2397	0	0
DYNLL1	1025	1179	4216	4063	21.57	23.35	175.09	171.91	22.46	173.5	2.9495	0	0
GGT5	11850	12928	49	38	249.38	256.07	2.03	1.61	252.725	1.82	-7.1175	0	0
SERPIND1	311	407	5090	5213	6.54	8.06	211.38	220.56	7.3	215.97	4.8868	0	0
CLDN5	3089	3139	10270	10364	65.01	62.17	426.5	438.51	63.59	432.505	2.7658	0	0
SFSWAP	6000	6668	9580	10149	126.27	132.07	397.85	429.41	129.17	413.63	1.6791	0	0
RPL6	37248	38791	61673	59009	783.87	768.34	2561.22	2496.7	776.105	2528.96	1.7042	0	0
PEBP1	22800	24391	65	50	479.82	483.12	2.7	2.12	481.47	2.41	-7.6423	0	0
SLC27A6	255	262	2967	2950	5.37	5.19	123.22	124.82	5.28	124.02	4.5539	0	0
SLC12A2	29891	32950	3072	3107	629.04	652.65	127.58	131.46	640.845	129.52	-2.3068	0	0
GLRX	168	193	3651	3430	3.54	3.82	151.62	145.12	3.68	148.37	5.3333	0	0
NR2F1	4320	4105	12299	12054	90.91	81.31	510.77	510.01	86.11	510.39	2.5673	0	0
RPS23	25237	25582	38754	36494	531.1	506.71	1609.42	1544.08	518.905	1576.75	1.6034	0	0
ACOT12	403	455	3777	3901	8.48	9.01	156.86	165.05	8.745	160.955	4.2021	0	0
NSA2	4555	4909	9355	9780	95.86	97.23	388.5	413.8	96.545	401.15	2.0549	0	0
HMGCR	3876	4141	6520	6355	81.57	82.02	270.77	268.88	81.795	269.825	1.7219	0	0
AP3B1	3406	3665	6504	6573	71.68	72.59	270.11	278.11	72.135	274.11	1.926	0	0
PIK3R1	1402	1353	12890	12685	29.5	26.8	535.31	536.71	28.15	536.01	4.2511	0	0
PLPP1	1581	2098	6102	6073	33.27	41.56	253.41	256.95	37.415	255.18	2.7698	0	0
RPL37	12116	12555	28742	27520	254.98	248.68	1193.63	1164.38	251.83	1179.01	2.227	0	0
LIFR	11241	12940	105	92	236.56	256.31	4.36	3.89	246.435	4.125	-5.9007	0	0
NPR3	12883	15053	52	44	271.12	298.16	2.16	1.86	284.64	2.01	-7.1458	0	0
NEDD4L	333	382	4151	4158	7.01	7.57	172.39	175.93	7.29	174.16	4.5784	0	0
ATP8B1	12783	13491	442	500	269.01	267.22	18.36	21.16	268.115	19.76	-3.7622	0	0
SMAD7	1612	1578	4173	4063	33.92	31.26	173.3	171.91	32.59	172.605	2.405	0	0
RPL17	27563	28270	56251	53443	580.05	559.95	2336.05	2261.2	570	2298.62	2.0117	0	0
AQP3	2024	2130	13353	13093	42.59	42.19	554.54	553.97	42.39	554.255	3.7088	0	0
LOXL3	1810	1786	4709	4655	38.09	35.38	195.56	196.96	36.735	196.26	2.4175	0	0
MPND	974	1003	3208	3125	20.5	19.87	133.23	132.22	20.185	132.725	2.7171	0	0
BTF3	2515	2639	9743	9909	52.93	52.27	404.62	419.25	52.6	411.935	2.9693	0	0
C7	7660	8376	10754	10530	161.2	165.91	446.6	445.53	163.555	446.065	1.4475	0	0
TLN2	5028	5366	26554	25747	105.81	106.29	1102.76	1089.37	106.05	1096.07	3.3695	0	0
BOC	5345	5588	10683	9805	112.48	110.68	443.66	414.85	111.58	429.255	1.9438	0	0
HGD	18	27	3545	3528	0.38	0.53	147.22	149.27	0.455	148.245	8.3479	0	0
ZBTB20	22225	22926	239	277	467.71	454.1	9.93	11.72	460.905	10.825	-5.412	0	0
GJA5	335	337	23079	23586	7.05	6.68	958.45	997.94	6.865	978.195	7.1547	0	0
KCNE1	13964	14995	694	745	293.87	297.01	28.82	31.52	295.44	30.17	-3.2917	0	0
CCT8	7818	8096	10787	10895	164.53	160.36	447.97	460.97	162.445	454.47	1.4842	0	0
APP	95443	101834	85651	81408	2008.55	2017.05	3557.01	3444.41	2012.8	3500.71	0.7984	0	0
CENPV	614	611	4324	3978	12.92	12.1	179.57	168.31	12.51	173.94	3.7974	0	0
CPD	15901	16244	990	984	334.63	321.75	41.11	41.63	328.19	41.37	-2.9879	0	0
ANKRD13B	1062	1106	3691	3744	22.35	21.91	153.28	158.41	22.13	155.845	2.816	0	0
RPL23A	19174	19415	23648	23673	403.51	384.56	982.08	1001.62	394.035	991.85	1.3318	0	0
ALDOC	29897	30671	94106	93371	629.17	607.51	3908.14	3950.57	618.34	3929.36	2.6678	0	0
CLDN4	6986	7660	11303	11540	147.02	151.72	469.4	488.26	149.37	478.83	1.6806	0	0
PITPNA	14732	16289	676	643	310.03	322.64	28.07	27.21	316.335	27.64	-3.5166	0	0
HIPK1	13783	14713	370	375	290.06	291.42	15.37	15.87	290.74	15.62	-4.2183	0	0
ID3	3787	3992	6857	6551	79.7	79.07	284.77	277.18	79.385	280.975	1.8235	0	0
AHDC1	6437	6796	9579	9091	135.46	134.61	397.81	384.64	135.035	391.225	1.5347	0	0
SYNRG	16199	17216	499	531	340.9	341	20.72	22.47	340.95	21.595	-3.9808	0	0
SLC26A9	446	535	6588	6754	9.39	10.6	273.59	285.77	9.995	279.68	4.8064	0	0
TMCC2	59272	59929	988	1044	1247.35	1187.03	41.03	44.17	1217.19	42.6	-4.8366	0	0
RPS10	30260	30485	82241	78478	636.81	603.82	3415.4	3320.44	620.315	3367.92	2.4408	0	0
RHOC	1416	1379	8144	8285	29.8	27.31	338.21	350.54	28.555	344.375	3.5922	0	0
RPL8	43245	44483	56347	54344	910.07	881.08	2340.04	2299.32	895.575	2319.68	1.373	0	0
MATN1	438	366	2719	2671	9.22	7.25	112.92	113.01	8.235	112.965	3.778	0	0
PTPRU	7168	7476	13130	12758	150.85	148.08	545.28	539.8	149.465	542.54	1.8599	0	0
GNL2	1926	2180	14678	14364	40.53	43.18	609.56	607.75	41.855	608.655	3.8622	0	0
EIF3I	8205	8356	10543	10440	172.67	165.51	437.84	441.72	169.09	439.78	1.379	0	0
COL9A2	84301	84428	9952	10081	1774.08	1672.28	413.3	426.53	1723.18	419.915	-2.0369	0	0
SRRM1	10774	11085	21698	20861	226.73	219.56	901.1	882.64	223.145	891.87	1.9989	0	0
CLIC4	20467	21412	1567	1669	430.72	424.11	65.08	70.62	427.415	67.85	-2.6552	0	0
RPL11	19048	19129	42747	41140	400.86	378.89	1775.24	1740.65	389.875	1757.94	2.1728	0	0
TBX2	3705	4090	8936	8446	77.97	81.01	371.1	357.35	79.49	364.225	2.196	0	0
RPL24	13451	14147	25787	24947	283.07	280.21	1070.91	1055.52	281.64	1063.21	1.9165	0	0
PRPS2	441	434	3095	3323	9.28	8.6	128.53	140.6	8.94	134.565	3.9119	0	0
DMD	16591	17550	256	250	349.15	347.62	10.63	10.58	348.385	10.605	-5.0379	0	0
RPL31	17560	18266	28483	27674	369.54	361.8	1182.87	1170.9	365.67	1176.88	1.6864	0	0
COL4A2	7491	7740	11247	10849	157.64	153.31	467.08	459.03	155.475	463.055	1.5745	0	0
ITGBL1	343	384	6735	6454	7.22	7.61	279.7	273.07	7.415	276.385	5.2201	0	0
DNAJC3	18661	20710	760	699	392.71	410.21	31.56	29.58	401.46	30.57	-3.7151	0	0
TPT1	51381	54105	77079	77251	1081.29	1071.67	3201.02	3268.53	1076.48	3234.78	1.5873	0	0
ITM2B	24539	25758	46908	48346	516.41	510.19	1948.05	2045.54	513.3	1996.8	1.9598	0	0
NR4A1	1058	1074	23762	24405	22.27	21.27	986.81	1032.59	21.77	1009.7	5.5354	0	0
NABP2	1044	1124	4218	4038	21.97	22.26	175.17	170.85	22.115	173.01	2.9678	0	0
MYL6	42583	44026	4747	4657	896.14	872.03	197.14	197.04	884.085	197.09	-2.1653	0	0
PMEL	30	48	3535	3281	0.63	0.95	146.81	138.82	0.79	142.815	7.4981	0	0
NACA	15182	15720	26525	26444	319.5	311.37	1101.56	1118.86	315.435	1110.21	1.8154	0	0
DAZAP2	1122	1163	6957	6934	23.61	23.04	288.92	293.38	23.325	291.15	3.6418	0	0
SLC4A8	11816	12250	149	194	248.66	242.64	6.19	8.21	245.65	7.2	-5.0925	0	0
COL2A1	2591	2669	63860	61365	54.53	52.87	2652.05	2596.38	53.7	2624.22	5.6108	0	0
PCBP3	1292	1414	25709	24602	27.19	28.01	1067.67	1040.92	27.6	1054.3	5.2555	0	0
KRT18	3887	3878	7851	7188	81.8	76.81	326.05	304.13	79.305	315.09	1.9903	0	0
KRT8	7030	7218	38466	36641	147.94	142.97	1597.46	1550.3	145.455	1573.88	3.4357	0	0
KRT7	31701	32943	48619	46202	667.13	652.51	2019.1	1954.83	659.82	1986.96	1.5904	0	0
FRY	3630	3896	7679	7941	76.39	77.17	318.9	335.99	76.78	327.445	2.0925	0	0
RPL21	25337	25934	45268	44945	533.21	513.68	1879.94	1901.64	523.445	1890.79	1.8529	0	0
SHISA2	10841	11337	407	423	228.14	224.55	16.9	17.9	226.345	17.4	-3.7014	0	0
GJB2	28442	30931	42908	43092	598.55	612.66	1781.93	1823.24	605.605	1802.59	1.5736	0	0
RPS3	32956	34209	92142	87885	693.54	677.59	3826.58	3718.46	685.565	3772.52	2.4602	0	0
SYTL2	1876	1992	4992	4726	39.48	39.46	207.31	199.96	39.47	203.635	2.3672	0	0
APBB1	5947	6157	12163	11779	125.15	121.95	505.12	498.38	123.55	501.75	2.0219	0	0
RRP8	542	605	3683	3503	11.41	11.98	152.95	148.21	11.695	150.58	3.6866	0	0
SON	19165	20638	36607	36254	403.32	408.78	1520.26	1533.92	406.05	1527.09	1.9111	0	0
GDAP2	1052	1148	3986	3625	22.14	22.74	165.54	153.38	22.44	159.46	2.829	0	0
SIK1	8979	9646	28734	27536	188.96	191.06	1193.3	1165.06	190.01	1179.18	2.6336	0	0
RPL10A	15930	16946	61669	59928	335.24	335.65	2561.06	2535.58	335.445	2548.32	2.9254	0	0
L3MBTL3	652	799	3891	4013	13.72	15.83	161.59	169.79	14.775	165.69	3.4873	0	0
ITPR2	4442	4866	8997	8703	93.48	96.38	373.64	368.23	94.93	370.935	1.9662	0	0
PPFIBP2	9333	10022	35681	34509	196.41	198.51	1481.8	1460.09	197.46	1470.94	2.8971	0	0
PKP2	4680	4816	22825	21597	98.49	95.39	947.9	913.78	96.94	930.84	3.2634	0	0
FBLN1	5375	6114	20711	19806	113.11	121.1	860.11	838	117.105	849.055	2.8581	0	0
KDM7A	1813	1859	44559	41485	38.15	36.82	1850.5	1755.25	37.485	1802.88	5.5878	0	0
CREB3L2	43525	47202	5166	5210	915.96	934.94	214.54	220.44	925.45	217.49	-2.0892	0	0
TBXAS1	559	603	3527	3334	11.76	11.94	146.47	141.06	11.85	143.765	3.6008	0	0
B4GALNT3	17035	17989	1082	1016	358.49	356.31	44.93	42.99	357.4	43.96	-3.0233	0	0
SLC6A13	441	495	3298	3315	9.28	9.8	136.96	140.26	9.54	138.61	3.8609	0	0
CD74	54726	56182	1150	1074	1151.68	1112.81	47.76	45.44	1132.24	46.6	-4.6027	0	0
SGCD	9341	9791	157	180	196.58	193.93	6.52	7.62	195.255	7.07	-4.7875	0	0
RPS14	35537	36865	71025	67381	747.86	730.19	2949.61	2850.92	739.025	2900.26	1.9725	0	0
TNIP1	26541	26946	2006	2017	558.54	533.73	83.31	85.34	546.135	84.325	-2.6952	0	0
CTNNA1	23058	25290	1992	1862	485.24	500.92	82.73	78.78	493.08	80.755	-2.6102	0	0
PCDH12	205	192	1990	2037	4.31	3.8	82.64	86.19	4.055	84.415	4.3797	0	0
JADE2	12286	12459	429	474	258.55	246.78	17.82	20.06	252.665	18.94	-3.7377	0	0
DDX46	3995	4163	8151	7847	84.07	82.46	338.5	332.01	83.265	335.255	2.0095	0	0
CCNG1	4338	4478	23171	24100	91.29	88.7	962.27	1019.68	89.995	990.975	3.4609	0	0
HARS2	826	848	3747	3730	17.38	16.8	155.61	157.82	17.09	156.715	3.1969	0	0
CLK1	4336	4206	7993	8665	91.25	83.31	331.94	366.62	87.28	349.28	2.0007	0	0
SLIT3	6159	6615	9230	9258	129.61	131.02	383.31	391.71	130.315	387.51	1.5722	0	0
SHROOM1	165	139	2447	2742	3.47	2.75	101.62	116.02	3.11	108.82	5.1289	0	0
DUSP1	8014	8356	13216	12897	168.65	165.51	548.85	545.68	167.08	547.265	1.7117	0	0
ERGIC1	9784	10522	147	172	205.9	208.41	6.1	7.28	207.155	6.69	-4.9526	0	0
EGR1	11945	12285	17127	16753	251.38	243.33	711.27	708.83	247.355	710.05	1.5213	0	0
ANO4	251	269	2381	2263	5.28	5.33	98.88	95.75	5.305	97.315	4.1972	0	0
RPS16	24760	25632	40965	39208	521.06	507.7	1701.24	1658.91	514.38	1680.08	1.7076	0	0
OTOGL	47175	51944	87301	90518	992.78	1028.87	3625.53	3829.86	1010.83	3727.7	1.8828	0	0
DCN	47746	52886	5190	5340	1004.79	1047.52	215.54	225.94	1026.15	220.74	-2.2168	0	0
RPL18A	14932	16042	32127	32670	314.24	317.75	1334.21	1382.28	315.995	1358.24	2.1038	0	0
PHLDA1	30717	31223	1283	1175	646.43	618.44	53.28	49.71	632.435	51.495	-3.6184	0	0
SLC38A2	26215	28734	2494	2333	551.68	569.14	103.57	98.71	560.41	101.14	-2.4701	0	0
TMEM209	686	840	3267	3367	14.44	16.64	135.68	142.46	15.54	139.07	3.1618	0	0
NPTN	10996	12270	17326	17611	231.41	243.03	719.53	745.13	237.22	732.33	1.6263	0	0
RPS17	26714	26657	33584	33158	562.18	528	1394.71	1402.93	545.09	1398.82	1.3596	0	0
RSL24D1	1262	1358	8125	8075	26.56	26.9	337.42	341.66	26.73	339.54	3.667	0	0
MYEF2	3554	3855	10027	9540	74.79	76.36	416.41	403.64	75.575	410.025	2.4397	0	0
IGF1R	10120	11232	355	335	212.97	222.47	14.74	14.17	217.72	14.455	-3.9128	0	0
CERS3	293	295	5687	5745	6.17	5.84	236.18	243.07	6.005	239.625	5.3185	0	0
RPL4	58846	59413	137083	131506	1238.39	1176.81	5692.94	5564.08	1207.6	5628.51	2.2206	0	0
ITGA11	15517	16235	236	246	326.55	321.57	9.8	10.41	324.06	10.105	-5.0031	0	0
MTHFD2	1134	1135	9161	8899	23.86	22.48	380.45	376.52	23.17	378.485	4.0299	0	0
HKDC1	321	329	9613	9097	6.76	6.52	399.22	384.9	6.64	392.06	5.8837	0	0
SFRP1	12704	13530	28936	27978	267.35	267.99	1201.69	1183.76	267.67	1192.72	2.1557	0	0
PEBP4	9910	10207	68	62	208.55	202.17	2.82	2.62	205.36	2.72	-6.2384	0	0
VDAC3	3473	3677	8396	7838	73.09	72.83	348.68	331.63	72.96	340.155	2.221	0	0
PRKACA	102	127	1991	1839	2.15	2.52	82.68	77.81	2.335	80.245	5.1029	0	0
C3	4508	4447	10031	9662	94.87	88.08	416.58	408.8	91.475	412.69	2.1736	0	0
VAMP2	839	935	6067	5709	17.66	18.52	251.96	241.55	18.09	246.755	3.7698	0	0
PPFIBP1	11281	11955	35164	32955	237.4	236.8	1460.33	1394.34	237.1	1427.34	2.5898	0	0
CDKN1B	8786	9357	113	99	184.9	185.34	4.69	4.19	185.12	4.44	-5.3818	0	0
ARSI	795	892	4562	4357	16.73	17.67	189.46	184.35	17.2	186.905	3.4418	0	0
NUP107	1971	2333	7640	7569	41.48	46.21	317.28	320.25	43.845	318.765	2.862	0	0
CTC1	1760	1727	6514	6186	37.04	34.21	270.52	261.73	35.625	266.125	2.9011	0	0
OTOG	36826	40500	107666	104946	774.99	802.19	4471.27	4440.32	788.59	4455.8	2.4983	0	0
PLEKHA7	7236	7598	10469	10060	152.28	150.5	434.77	425.64	151.39	430.205	1.5068	0	0
RPS13	9802	10046	21852	21133	206.28	198.98	907.49	894.15	202.63	900.82	2.1524	0	0
GAS2	10617	11489	14859	15025	223.43	227.57	617.08	635.72	225.5	626.4	1.474	0	0
SBF2	3033	3314	11955	11284	63.83	65.64	496.48	477.43	64.735	486.955	2.9112	0	0
CD44	887	956	4456	4325	18.67	18.94	185.05	182.99	18.805	184.02	3.2907	0	0
LRP4	5487	5841	8911	8417	115.47	115.69	370.07	356.13	115.58	363.1	1.6515	0	0
MDK	8125	7887	13362	13305	170.99	156.22	554.91	562.94	163.605	558.925	1.7724	0	0
FNBP4	8954	9128	20265	19250	188.43	180.8	841.59	814.48	184.615	828.035	2.1652	0	0
CHID1	1622	1794	4128	4066	34.13	35.53	171.43	172.03	34.83	171.73	2.3017	0	0
CD151	31985	35074	2661	2613	673.11	694.72	110.51	110.56	683.915	110.535	-2.6293	0	0
RPLP2	14014	14654	30996	30731	294.92	290.25	1287.24	1300.24	292.585	1293.74	2.1446	0	0
TALDO1	5002	5257	12075	11171	105.26	104.13	501.46	472.65	104.695	487.055	2.2179	0	0
FRMD8	1123950	1238720	1949	2133	23653	24535.6	80.94	90.25	24094.3	85.595	-8.1369	0	0
EEF1G	23665	24067	56322	53192	498.02	476.7	2339	2250.58	487.36	2294.79	2.2353	0	0
SPTBN2	2716	2645	7219	7223	57.16	52.39	299.8	305.61	54.775	302.705	2.4663	0	0
ANKRD11	16200	16644	29	36	340.92	329.67	1.2	1.52	335.295	1.36	-7.9457	0	0
RPL13	28683	29621	80492	78394	603.62	586.71	3342.76	3316.89	595.165	3329.82	2.4841	0	0
TAT	743	736	17539	18137	15.64	14.58	728.38	767.39	15.11	747.885	5.6292	0	0
NFAT5	18310	19467	643	793	385.33	385.59	26.7	33.55	385.46	30.125	-3.6775	0	0
CDH1	10564	10791	259	289	222.31	213.74	10.76	12.23	218.025	11.495	-4.2454	0	0
MAP1LC3B	21234	21622	1295	1369	446.86	428.27	53.78	57.92	437.565	55.85	-2.9699	0	0
GPT2	16559	17569	287	278	348.48	347.99	11.92	11.76	348.235	11.84	-4.8783	0	0
NDRG4	19134	20475	21187	22256	402.67	405.55	879.88	941.66	404.11	910.77	1.1723	0	0
LCAT	29224	30321	168	138	615.01	600.57	6.98	5.84	607.79	6.41	-6.5671	0	0
SLC44A5	9293	10609	88	84	195.57	210.13	3.65	3.55	202.85	3.6	-5.8163	0	0
RPS8	43009	44329	50954	50004	905.1	878.03	2116.07	2115.69	891.565	2115.88	1.2468	0	0
VWC2L	649	662	4712	5046	13.66	13.11	195.69	213.5	13.385	204.595	3.9341	0	0
PAPPA2	299	276	2946	2717	6.29	5.47	122.34	114.96	5.88	118.65	4.3348	0	0
QSOX1	27573	27189	301	350	580.26	538.54	12.5	14.81	559.4	13.655	-5.3564	0	0
RPL5	39549	41979	54890	53533	832.29	831.49	2279.53	2265.01	831.89	2272.27	1.4497	0	0
MYOC	15398	16083	499	488	324.04	318.56	20.72	20.65	321.3	20.685	-3.9573	0	0
RGS5	1820	1923	9455	10176	38.3	38.09	392.66	430.55	38.195	411.605	3.4298	0	0
CFH	4396	5164	12890	13446	92.51	102.28	535.31	568.91	97.395	552.11	2.503	0	0
CSDC2	149	198	2254	2518	3.14	3.92	93.61	106.54	3.53	100.075	4.8253	0	0
RGS2	1585	1628	6234	6603	33.36	32.25	258.89	279.38	32.805	269.135	3.0363	0	0
TPR	8904	9632	200	223	187.38	190.78	8.31	9.44	189.08	8.875	-4.4131	0	0
SREBF2	18947	19349	994	969	398.73	383.25	41.28	41	390.99	41.14	-3.2485	0	0
DDX17	29938	32115	40861	40694	630.03	636.11	1696.92	1721.78	633.07	1709.35	1.433	0	0
CBX7	16906	18060	210	267	355.78	357.72	8.72	11.3	356.75	10.01	-5.1554	0	0
RPL3	55277	57323	120917	116142	1163.28	1135.41	5021.58	4914.02	1149.35	4967.8	2.1118	0	0
SYNGR1	21957	23525	460	449	462.07	465.96	19.1	19	464.015	19.05	-4.6063	0	0
MGAT3	19724	20010	326	375	415.08	396.34	13.54	15.87	405.71	14.705	-4.7861	0	0
ATF4	17513	18562	24670	23329	368.55	367.66	1024.52	987.06	368.105	1005.79	1.4501	0	0
IPPK	2727	3256	17528	17027	57.39	64.49	727.92	720.42	60.94	724.17	3.5709	0	0
WFDC2	63	57	26547	25257	1.33	1.13	1102.47	1068.64	1.23	1085.56	9.7856	0	0
ARHGDIB	8956	8964	139	113	188.47	177.55	5.77	4.78	183.01	5.275	-5.1166	0	0
RPL32	14791	16448	32213	31271	311.27	325.79	1337.78	1323.09	318.53	1330.43	2.0624	0	0
GATA2	7053	7531	12106	12205	148.43	149.17	502.75	516.4	148.8	509.575	1.7759	0	0
LAMB2	17061	17158	855	756	359.04	339.85	35.51	31.99	349.445	33.75	-3.3721	0	0
IL17RC	11468	12457	217	205	241.34	246.74	9.01	8.67	244.04	8.84	-4.7869	0	0
FAM107A	1383	1545	6761	6661	29.1	30.6	280.78	281.83	29.85	281.305	3.2363	0	0
DKK3	8875	9123	18614	18057	186.77	180.7	773.02	764	183.735	768.51	2.0644	0	0
SVIP	1591	1560	8193	7750	33.48	30.9	340.25	327.91	32.19	334.08	3.3755	0	0
EIF3D	11819	12443	29479	29303	248.73	246.46	1224.24	1239.82	247.595	1232.03	2.315	0	0
PDE12	857	936	4665	4296	18.04	18.54	193.73	181.77	18.29	187.75	3.3597	0	0
NISCH	5698	6032	10489	10575	119.91	119.48	435.6	447.43	119.695	441.515	1.8831	0	0
RPS27A	15463	16199	34847	34589	325.41	320.86	1447.16	1463.48	323.135	1455.32	2.1711	0	0
SLC3A1	149	152	2955	3078	3.14	3.01	122.72	130.23	3.075	126.475	5.3621	0	0
LPGAT1	17721	19120	157	168	372.93	378.71	6.52	7.11	375.82	6.815	-5.7852	0	0
PTPN14	3713	4052	7422	7641	78.14	80.26	308.23	323.29	79.2	315.76	1.9953	0	0
EPHX1	1799	2051	19813	19106	37.86	40.62	822.82	808.38	39.24	815.6	4.3775	0	0
EHD3	16532	17862	879	910	347.91	353.8	36.5	38.5	350.855	37.5	-3.2259	0	0
CUL9	6054	6432	9941	9598	127.4	127.4	412.84	406.1	127.4	409.47	1.6844	0	0
TTBK1	1986	2132	11266	10510	41.79	42.23	467.87	444.68	42.01	456.275	3.4411	0	0
PNO1	985	1023	5426	5017	20.73	20.26	225.34	212.27	20.495	218.805	3.4163	0	0
UGP2	3907	4453	8295	7869	82.22	88.2	344.48	332.94	85.21	338.71	1.991	0	0
FBLN7	2919	2860	8267	8111	61.43	56.65	343.32	343.18	59.04	343.25	2.5395	0	0
HEBP2	35112	37665	442	384	738.92	746.04	18.36	16.25	742.48	17.305	-5.4231	0	0
CFAP61	575	652	2679	2682	12.1	12.91	111.26	113.48	12.505	112.37	3.1677	0	0
CYP1B1	12182	12953	544	527	256.36	256.56	22.59	22.3	256.46	22.445	-3.5143	0	0
VIT	100	103	1806	1674	2.1	2.04	75	70.83	2.07	72.915	5.1385	0	0
SCCPDH	56799	61053	4903	4870	1195.31	1209.29	203.62	206.05	1202.3	204.835	-2.5533	0	0
FABP7	976	1076	5837	5694	20.54	21.31	242.41	240.92	20.925	241.665	3.5297	0	0
CCN2	5146	5009	29126	28671	108.3	99.21	1209.58	1213.08	103.755	1211.33	3.5453	0	0
RPS12	36872	38006	40921	39068	775.95	752.79	1699.41	1652.99	764.37	1676.2	1.1329	0	0
LAMA4	2693	2892	5160	5352	56.67	57.28	214.29	226.45	56.975	220.37	1.9515	0	0
AMD1	7769	8662	19711	21414	163.5	171.57	818.58	906.04	167.535	862.31	2.3637	0	0
COL12A1	8863	9733	13860	14051	186.52	192.78	575.59	594.5	189.65	585.045	1.6252	0	0
EEF1A1	315738	331688	366066	354209	6644.56	6569.82	15202.4	14986.8	6607.19	15094.6	1.1919	0	0
ELOVL5	5216	6044	12633	12934	109.77	119.71	524.64	547.24	114.74	535.94	2.2237	0	0
ABCC5	6418	6765	13056	12908	135.06	134	542.2	546.14	134.53	544.17	2.0161	0	0
PTMA	6778	7764	10849	11653	142.64	153.78	450.55	493.04	148.21	471.795	1.6705	0	0
EIF4A2	66028	74402	8814	8866	1389.53	1473.7	366.04	375.12	1431.62	370.58	-1.9498	0	0
EIF5A	5829	6085	14335	14362	122.67	120.53	595.32	607.66	121.6	601.49	2.3064	0	0
SLC7A14	11920	12654	320	373	250.85	250.64	13.29	15.78	250.745	14.535	-4.1086	0	0
OTOL1	42255	43769	12	26	889.24	866.94	0.5	1.1	878.09	0.8	-10.1002	0	0
RARRES1	2860	3189	59347	62031	60.19	63.17	2464.63	2624.56	61.68	2544.59	5.3665	0	0
PFN2	9560	10099	16314	16543	201.19	200.03	677.51	699.94	200.61	688.725	1.7795	0	0
PCOLCE2	542	597	16020	15935	11.41	11.82	665.3	674.22	11.615	669.76	5.8496	0	0
CHST2	2366	2613	7705	7270	49.79	51.76	319.98	307.6	50.775	313.79	2.6276	0	0
STK25	8857	9335	72	51	186.39	184.9	2.99	2.16	185.645	2.575	-6.1718	0	0
SNORC	308	354	3136	3127	6.48	7.01	130.24	132.3	6.745	131.27	4.2826	0	0
GPC5	561	632	3789	3767	11.81	12.52	157.35	159.38	12.165	158.365	3.7024	0	0
OTOS	23303	24311	45807	46683	490.4	481.53	1902.32	1975.18	485.965	1938.75	1.9962	0	0
DNER	15360	17070	18460	17583	323.24	338.11	766.63	743.95	330.675	755.29	1.1916	0	0
RPS7	20406	20674	37150	35697	429.43	409.49	1542.81	1510.36	419.46	1526.59	1.8637	0	0
COLEC11	171	180	4493	4242	3.6	3.57	186.59	179.48	3.585	183.035	5.674	0	0
FKBP1B	697	724	8287	8443	14.67	14.34	344.15	357.23	14.505	350.69	4.5956	0	0
CLIC5	31701	33242	1032	888	667.13	658.43	42.86	37.57	662.78	40.215	-4.0427	0	0
CTSB	59841	60846	4081	3813	1259.33	1205.19	169.48	161.33	1232.26	165.405	-2.8972	0	0
PINX1	959	918	5883	5672	20.18	18.18	244.32	239.99	19.18	242.155	3.6583	0	0
OTOF	123249	129151	8869	8769	2593.72	2558.12	368.32	371.02	2575.92	369.67	-2.8008	0	0
CLU	206636	213590	260883	244681	4348.56	4230.62	10834.2	10352.6	4289.59	10593.4	1.3043	0	0
TMEM214	4048	4072	10013	9416	85.19	80.65	415.83	398.4	82.92	407.115	2.2956	0	0
NRBP1	2364	2376	6686	6363	49.75	47.06	277.66	269.22	48.405	273.44	2.498	0	0
CAD	5422	5530	8123	7861	114.1	109.53	337.34	332.6	111.815	334.97	1.5829	0	0
HSP90AB1	2322	2544	86871	84092	48.87	50.39	3607.68	3557.97	49.63	3582.82	6.1737	0	0
SERP1	15668	17092	1067	974	329.73	338.54	44.31	41.21	334.135	42.76	-2.9661	0	0
RARRES2	14221	13746	398	389	299.27	272.27	16.53	16.46	285.77	16.495	-4.1148	0	0
PTPN23	2553	2545	8015	7399	53.73	50.41	332.86	313.06	52.07	322.96	2.6328	0	0
KANSL1	4364	4638	7692	7435	91.84	91.87	319.44	314.58	91.855	317.01	1.7871	0	0
DHX30	15247	16066	812	823	320.87	318.22	33.72	34.82	319.545	34.27	-3.221	0	0
GTPBP4	2420	2752	32099	31338	50.93	54.51	1333.04	1325.93	52.72	1329.48	4.6564	0	0
BAMBI	1816	1925	4321	4120	38.22	38.13	179.45	174.32	38.175	176.885	2.2121	0	0
ARHGAP21	5876	6381	11725	11340	123.66	126.39	486.93	479.8	125.025	483.365	1.9509	0	0
NEBL	12197	14651	348	386	256.68	290.2	14.45	16.33	273.44	15.39	-4.1512	0	0
ITGA8	2456	2472	6733	6658	51.69	48.96	279.62	281.7	50.325	280.66	2.4795	0	0
FZD1	4757	4664	10381	9794	100.11	92.38	431.11	414.39	96.245	422.75	2.135	0	0
AKAP9	10416	11428	21016	20556	219.2	226.36	872.78	869.73	222.78	871.255	1.9675	0	0
C1GALT1	13053	14004	769	770	274.69	277.38	31.94	32.58	276.035	32.26	-3.097	0	0
AGR2	862	1050	7675	7620	18.14	20.8	318.74	322.41	19.47	320.575	4.0413	0	0
ITGB8	11897	13379	142	184	250.37	265	5.9	7.79	257.685	6.845	-5.2344	0	0
RPL15	39680	41725	41236	39537	835.05	826.46	1712.49	1672.83	830.755	1692.66	1.0268	0	0
ATP2C1	8923	10111	205	232	187.78	200.27	8.51	9.82	194.025	9.165	-4.404	0	0
EIF1B	4869	5137	11189	10805	102.47	101.75	464.67	457.16	102.11	460.915	2.1744	0	0
CLEC3B	20676	22505	54	55	435.12	445.76	2.24	2.33	440.44	2.285	-7.5906	0	0
ZNFX1	12079	13149	250	198	254.2	260.45	10.38	8.38	257.325	9.38	-4.7779	0	0
RNF152	10596	11527	341	339	222.99	228.32	14.16	14.34	225.655	14.25	-3.9851	0	0
PHACTR1	162	220	2342	2439	3.41	4.36	97.26	103.2	3.885	100.23	4.6893	0	0
JARID2	2770	2820	26755	27906	58.29	55.86	1111.11	1180.72	57.075	1145.91	4.3275	0	0
LAMA3	2313	2434	5709	5913	48.68	48.21	237.09	250.18	48.445	243.635	2.3303	0	0
CEBPD	3050	2966	7319	7400	64.19	58.75	303.95	313.1	61.47	308.525	2.3274	0	0
RPS20	21502	22865	29914	30240	452.5	452.89	1242.3	1279.47	452.695	1260.88	1.4778	0	0
EYA1	4966	5601	10951	11694	104.51	110.94	454.79	494.78	107.725	474.785	2.1399	0	0
RPL7	24281	24604	60094	58458	510.98	487.34	2495.65	2473.39	499.16	2484.52	2.3154	0	0
RDH10	1578	1566	5283	5159	33.21	31.02	219.4	218.28	32.115	218.84	2.7686	0	0
NECAB1	9856	10319	92	82	207.41	204.39	3.82	3.47	205.9	3.645	-5.8199	0	0
RPL30	13412	14198	29732	29259	282.25	281.22	1234.74	1237.96	281.735	1236.35	2.1337	0	0
LAPTM4B	441	428	2800	2867	9.28	8.48	116.28	121.3	8.88	118.79	3.7417	0	0
AZIN1	4985	5670	10261	9966	104.91	112.31	426.13	421.67	108.61	423.9	1.9646	0	0
FZD6	3793	4452	8077	8030	79.82	88.18	335.43	339.75	84	337.59	2.0068	0	0
RPLP1	29565	31047	83238	77406	622.18	614.95	3456.8	3275.09	618.565	3365.95	2.444	0	0
EEF1D	28389	29856	52223	49771	597.43	591.36	2168.77	2105.84	594.395	2137.3	1.8463	0	0
OPLAH	293	264	2177	2151	6.17	5.23	90.41	91.01	5.7	90.71	3.9922	0	0
PUF60	6031	6292	12030	11332	126.92	124.63	499.6	479.46	125.775	489.53	1.9606	0	0
CPSF1	1740	1698	6731	6387	36.62	33.63	279.53	270.24	35.125	274.885	2.9683	0	0
RPL14	15045	16440	22065	20539	316.62	325.63	916.34	869.02	321.125	892.68	1.475	0	0
HTRA1	26337	28477	864	904	554.25	564.05	35.88	38.25	559.15	37.065	-3.9151	0	0
FGFR2	4891	5347	7933	7523	102.93	105.91	329.45	318.3	104.42	323.875	1.633	0	0
STK32C	9776	10220	42	67	205.73	202.43	1.74	2.83	204.08	2.285	-6.4808	0	0
NT5C2	5666	5567	15761	15706	119.24	110.27	654.54	664.53	114.755	659.535	2.5229	0	0
SUFU	12626	13585	388	447	265.71	269.08	16.11	18.91	267.395	17.51	-3.9327	0	0
PGAM1	45440	46695	4311	4244	956.26	924.9	179.03	179.57	940.58	179.3	-2.3912	0	0
HK1	33530	35625	3774	3621	705.62	705.63	156.73	153.21	705.625	154.97	-2.1869	0	0
DDX21	3234	3370	40666	41217	68.06	66.75	1688.82	1743.91	67.405	1716.37	4.6704	0	0
RPS24	26489	27888	33895	34553	557.45	552.38	1407.63	1461.95	554.915	1434.79	1.3705	0	0
UNC93B1	2256	2416	5592	5669	47.48	47.85	232.23	239.86	47.665	236.045	2.3081	0	0
HSPA8	108533	112984	17366	17322	2284.03	2237.9	721.19	732.9	2260.97	727.045	-1.6368	0	0
GRAMD1B	23293	25615	287	315	490.19	507.36	11.92	13.33	498.775	12.625	-5.304	0	0
SCN3B	24078	24619	81	84	506.71	487.63	3.36	3.55	497.17	3.455	-7.1689	0	0
APLP2	149122	156715	19775	19717	3138.2	3104.09	821.24	834.24	3121.14	827.74	-1.9148	0	0
RPL27A	16267	16915	24388	23899	342.33	335.04	1012.81	1011.18	338.685	1012	1.5792	0	0
THY1	26724	28651	1773	2033	562.39	567.5	73.63	86.02	564.945	79.825	-2.8232	0	0
RPS25	26544	27378	27644	27464	558.61	542.28	1148.03	1162.02	550.445	1155.03	1.0693	0	0
TMPRSS13	9084	9409	64	48	191.17	186.37	2.66	2.03	188.77	2.345	-6.3309	0	0
YBX1	30148	32287	136037	128777	634.45	639.52	5649.5	5448.62	636.985	5549.06	3.1229	0	0
RPL22	8509	10552	20286	20054	179.07	209.01	842.46	848.49	194.04	845.475	2.1234	0	0
MMEL1	11350	12567	184	198	238.86	248.92	7.64	8.38	243.89	8.01	-4.9283	0	0
KRAS	429	483	3437	3439	9.03	9.57	142.74	145.51	9.3	144.125	3.9539	0	0
FTH1	104115	110026	109626	103825	2191.05	2179.31	4552.67	4392.89	2185.18	4472.78	1.0334	0	0
NDUFA4	10055	9817	24156	24691	211.6	194.45	1003.18	1044.69	203.025	1023.93	2.3344	0	0
FBL	504	601	3877	3668	10.61	11.9	161.01	155.19	11.255	158.1	3.8122	0	0
CAPZB	7719	8561	13368	12503	162.44	169.57	555.16	529.01	166.005	542.085	1.7073	0	0
EPHA2	868	1007	3912	3564	18.27	19.95	162.46	150.79	19.11	156.625	3.0349	0	0
HSPB7	10231	10643	182	193	215.31	210.81	7.56	8.17	213.06	7.865	-4.7597	0	0
PADI2	61	52	3055	3232	1.28	1.03	126.87	136.75	1.155	131.81	6.8344	0	0
ECE1	5653	5457	10147	9871	118.96	108.09	421.4	417.65	113.525	419.525	1.8857	0	0
HP1BP3	7031	7822	11460	10710	147.96	154.93	475.92	453.15	151.445	464.535	1.617	0	0
A2M	2270	2499	81809	79559	47.77	49.5	3397.46	3366.18	48.635	3381.82	6.1197	0	0
RABL6	9601	10205	13366	13080	202.05	202.13	555.08	553.42	202.09	554.25	1.4555	0	0
BSPRY	318	294	3249	3002	6.69	5.82	134.93	127.02	6.255	130.975	4.3881	0	0
RPL12	14682	15682	33841	30521	308.98	310.62	1405.39	1291.36	309.8	1348.38	2.1218	0	0
NOXA1	513	583	5743	5850	10.8	11.55	238.5	247.52	11.175	243.01	4.4427	0	0
PNPLA6	3382	3669	10561	9781	71.17	72.67	438.59	413.84	71.92	426.215	2.5671	0	0
CARD9	430	471	3314	3449	9.05	9.33	137.63	145.93	9.19	141.78	3.9474	0	0
STOM	1266	1287	4664	4465	26.64	25.49	193.69	188.92	26.065	191.305	2.8757	0	0
GSN	136357	141611	19512	18216	2869.57	2804.92	810.32	770.73	2837.24	790.525	-1.8436	0	0
RPL7A	37288	38722	69830	65405	784.71	766.98	2899.98	2767.32	775.845	2833.65	1.8688	0	0
FLNA	639	557	51895	49620	13.45	11.03	2155.15	2099.45	12.24	2127.3	7.4413	0	0
FAM120C	16442	16864	498	545	346.01	334.03	20.68	23.06	340.02	21.87	-3.9586	0	0
BGN	495	604	5734	5917	10.42	11.96	238.13	250.35	11.19	244.24	4.448	0	0
AK1	1501	1741	6124	5904	31.59	34.48	254.32	249.8	33.035	252.06	2.9317	0	0
OLFML2A	26129	27250	1521	1433	549.87	539.75	63.17	60.63	544.81	61.9	-3.1377	0	0
RPL35	18843	19816	24443	23232	396.54	392.5	1015.1	982.96	394.52	999.03	1.3404	0	0
RPL36A	15886	15724	41997	39289	334.31	311.45	1744.1	1662.34	322.88	1703.22	2.3992	0	0
PLP1	31996	33256	35905	36575	673.34	658.71	1491.1	1547.51	666.025	1519.31	1.1898	0	0
FOXO4	10889	10587	240	219	229.15	209.7	9.97	9.27	219.425	9.62	-4.5115	0	0
TMEM255A	25575	26493	949	905	538.21	524.75	39.41	38.29	531.48	38.85	-3.774	0	0
ATP1B4	117349	123539	23	12	2469.56	2446.96	0.96	0.51	2458.26	0.735	-11.7076	0	0
SLC16A2	9885	10852	146	193	208.03	214.95	6.06	8.17	211.49	7.115	-4.8936	0	0
PAK3	24351	26004	2540	2517	512.46	515.07	105.48	106.5	513.765	105.99	-2.2772	0	0
SLC25A5	11731	11675	59283	57141	246.87	231.25	2461.97	2417.66	239.06	2439.82	3.3513	0	0
SH3BGRL	29131	31553	2861	2856	613.05	624.98	118.81	120.84	619.015	119.825	-2.369	0	0
ITM2A	81552	86968	10395	10744	1716.22	1722.59	431.7	454.58	1719.4	443.14	-1.9561	0	0
FHL1	862	943	11715	11675	18.14	18.68	486.51	493.97	18.41	490.24	4.7349	0	0
ATP11C	13737	14610	253	227	289.09	289.38	10.51	9.6	289.235	10.055	-4.8463	0	0
RACK1	47852	48737	88624	85197	1007.02	965.34	3680.48	3604.73	986.18	3642.61	1.885	0	0
TAPBP	15475	16236	511	461	325.66	321.59	21.22	19.51	323.625	20.365	-3.9902	0	0
PRX	2022	2000	6730	7787	42.55	39.61	279.49	329.47	41.08	304.48	2.8898	0	0
ACTN4	18658	19965	25756	24856	392.65	395.45	1069.62	1051.67	394.05	1060.64	1.4285	0	0
CAPNS2	157	130	2301	2298	3.3	2.57	95.56	97.23	2.935	96.395	5.0375	0	0
TC2N	828	861	6014	6187	17.42	17.05	249.76	261.77	17.235	255.765	3.8914	0	0
NEMF	3811	3964	6216	6239	80.2	78.52	258.14	263.98	79.36	261.06	1.7179	0	0
HSP90AA1	144231	155401	1973	2179	3035.28	3078.06	81.94	92.19	3056.67	87.065	-5.1337	0	0
CEP170B	17452	19045	195	221	367.27	377.23	8.1	9.35	372.25	8.725	-5.415	0	0
HSPA2	47844	50481	797	847	1006.85	999.89	33.1	35.84	1003.37	34.47	-4.8634	0	0
SYNE2	67442	71708	8700	8642	1419.29	1420.34	361.3	365.65	1419.82	363.475	-1.9658	0	0
DACT1	1195	1182	3829	4166	25.15	23.41	159.01	176.27	24.28	167.64	2.7875	0	0
PAPLN	24429	25261	28469	26968	514.1	500.35	1182.29	1141.03	507.225	1161.66	1.1955	0	0
RBM25	2974	3097	16920	17000	62.59	61.34	702.67	719.28	61.965	710.975	3.5203	0	0
SRSF5	11036	11317	41092	40232	232.25	224.16	1706.51	1702.24	228.205	1704.38	2.9008	0	0
GALNT16	2536	2689	6198	6169	53.37	53.26	257.4	261.01	53.315	259.205	2.2815	0	0
PRKD1	2970	3055	5465	5559	62.5	60.51	226.96	235.2	61.505	231.08	1.9096	0	0
CADM3	30013	31743	2039	2016	631.61	628.74	84.68	85.3	630.175	84.99	-2.8904	0	0
ISG20L2	2080	2212	5787	5561	43.77	43.81	240.33	235.29	43.79	237.81	2.4411	0	0
CRABP2	1255	1217	5973	5771	26.41	24.11	248.05	244.17	25.26	246.11	3.2844	0	0
RPUSD2	717	732	5315	5102	15.09	14.5	220.73	215.87	14.795	218.3	3.8831	0	0
KHDC4	4511	4569	9477	9485	94.93	90.5	393.57	401.31	92.715	397.44	2.0999	0	0
TAGLN2	9772	10018	19011	18596	205.65	198.43	789.51	786.81	202.04	788.16	1.9638	0	0
MPZ	61115	61080	120770	120522	1286.14	1209.82	5015.47	5099.34	1247.98	5057.4	2.0188	0	0
LMNA	517	457	4356	4165	10.88	9.05	180.9	176.22	9.965	178.56	4.1634	0	0
RPS27	13238	13916	66085	62205	278.59	275.64	2744.45	2631.92	277.115	2688.18	3.2781	0	0
S100A10	2448	2491	5719	5366	51.52	49.34	237.5	227.04	50.43	232.27	2.2034	0	0
S100A11	457	458	16521	15212	9.62	9.07	686.1	643.63	9.345	664.865	6.1527	0	0
S100A1	121461	123871	2356	2361	2556.09	2453.54	97.84	99.9	2504.82	98.87	-4.663	0	0
ILF2	7912	8051	11609	11506	166.5	159.47	482.11	486.82	162.985	484.465	1.5717	0	0
NPR1	96	114	2001	1919	2.02	2.26	83.1	81.19	2.14	82.145	5.2625	0	0
SNX27	4303	4743	8015	7697	90.55	93.95	332.86	325.66	92.25	329.26	1.8356	0	0
SELENBP1	10596	11060	163	173	222.99	219.07	6.77	7.32	221.03	7.045	-4.9715	0	0
TDRKH	144	157	1813	1762	3.03	3.11	75.29	74.55	3.07	74.92	4.609	0	0
PBXIP1	11133	10776	16205	15745	234.29	213.44	672.98	666.18	223.865	669.58	1.5806	0	0
ADAM15	16	16	7319	6583	0.34	0.32	303.95	278.53	0.33	291.24	9.7855	0	0
SCAMP3	3102	3224	6758	6634	65.28	63.86	280.65	280.69	64.57	280.67	2.1199	0	0
CLK2	1865	1892	15041	14853	39.25	37.48	624.64	628.44	38.365	626.54	4.0295	0	0
F11R	6809	6966	14943	14365	143.29	137.98	620.57	607.79	140.635	614.18	2.1267	0	0
PTGDS	30487	29968	581	609	641.58	593.58	24.13	25.77	617.58	24.95	-4.6295	0	0
CFAP77	101	121	2859	2634	2.13	2.4	118.73	111.45	2.265	115.09	5.6671	0	0
NOL4L	158	171	1881	1838	3.33	3.39	78.12	77.77	3.36	77.945	4.5359	0	0
CACNB1	1274	1507	5693	5669	26.81	29.85	236.43	239.86	28.33	238.145	3.0714	0	0
RPL19	43057	44015	53655	52587	906.11	871.81	2228.24	2224.98	888.96	2226.61	1.3247	0	0
RPL23	26166	27282	28621	27252	550.65	540.38	1188.6	1153.05	545.515	1170.83	1.1018	0	0
ARHGAP23	2989	2996	7947	7624	62.9	59.34	330.03	322.58	61.12	326.305	2.4165	0	0
MATN4	43150	44017	41496	41414	908.07	871.85	1723.29	1752.25	889.96	1737.77	0.9654	0	0
GRN	7559	7773	13956	13443	159.08	153.96	579.58	568.78	156.52	574.18	1.8752	0	0
FZD2	2834	2561	12501	12179	59.64	50.73	519.16	515.3	55.185	517.23	3.2285	0	0
MAPT	4269	4465	7464	6978	89.84	88.44	309.97	295.24	89.14	302.605	1.7633	0	0
WNT3	927	942	7728	7626	19.51	18.66	320.94	322.66	19.085	321.8	4.0757	0	0
SULF2	5163	5805	18996	18504	108.65	114.98	788.89	782.91	111.815	785.9	2.8132	0	0
SOX9	5198	5358	14299	13701	109.39	106.13	593.82	579.7	107.76	586.76	2.4449	0	0
NOTUM	1029	1237	4927	4883	21.65	24.5	204.61	206.6	23.075	205.605	3.1555	0	0
RPL38	5773	5958	8847	8558	121.49	118.01	367.41	362.09	119.75	364.75	1.6069	0	0
ACTG1	16398	17090	146012	142662	345.09	338.51	6063.75	6036.1	341.8	6049.93	4.1457	0	0
SLC38A10	18649	18892	140	103	392.46	374.2	5.81	4.36	383.33	5.085	-6.2362	0	0
MMD	8176	8709	187	177	172.06	172.5	7.77	7.49	172.28	7.63	-4.4969	0	0
NCOA5	2474	2710	4974	4952	52.06	53.68	206.57	209.52	52.87	208.045	1.9764	0	0
PLTP	26026	26943	91	112	547.71	533.67	3.78	4.74	540.69	4.26	-6.9878	0	0
MYL9	5594	5780	10901	10722	117.72	114.49	452.71	453.65	116.105	453.18	1.9647	0	0
SRSF6	20458	20659	29199	27411	430.53	409.2	1212.61	1159.77	419.865	1186.19	1.4983	0	0
CHD6	11257	11803	398	350	236.9	233.78	16.53	14.81	235.34	15.67	-3.9087	0	0
SNTA1	4100	4163	6590	6597	86.28	82.46	273.68	279.12	84.37	276.4	1.712	0	0
EPN3	9813	9809	144	128	206.51	194.29	5.98	5.42	200.4	5.7	-5.1358	0	0
HID1	19303	20027	1208	1219	406.22	396.68	50.17	51.58	401.45	50.875	-2.9802	0	0
CDR2L	2114	2167	4649	4528	44.49	42.92	193.07	191.58	43.705	192.325	2.1377	0	0
RNF157	3665	3707	7827	7725	77.13	73.43	325.05	326.85	75.28	325.95	2.1143	0	0
MXRA7	3048	3178	7760	7987	64.14	62.95	322.27	337.93	63.545	330.1	2.3771	0	0
SPAG9	18993	21145	1292	1268	399.7	418.82	53.66	53.65	409.26	53.655	-2.9312	0	0
FOXK2	3153	3402	6913	7474	66.35	67.38	287.09	316.23	66.865	301.66	2.1736	0	0
HS3ST3A1	1005	987	3213	3241	21.15	19.55	133.43	137.13	20.35	135.28	2.7328	0	0
PMP22	38346	41040	37091	37248	806.97	812.89	1540.36	1575.98	809.93	1558.17	0.944	0	0
AXIN2	3199	3422	10144	9998	67.32	67.78	421.27	423.02	67.55	422.145	2.6437	0	0
RPS11	28930	28747	36465	34610	608.82	569.4	1514.36	1464.37	589.11	1489.37	1.3381	0	0
ESYT3	358	346	2604	2726	7.53	6.85	108.14	115.34	7.19	111.74	3.958	0	0
MYLK	2161	2300	5216	5094	45.48	45.56	216.62	215.53	45.52	216.075	2.247	0	0
KALRN	9890	10410	15614	14922	208.13	206.19	648.44	631.36	207.16	639.9	1.6271	0	0
PTPN4	2715	2817	5621	5443	57.14	55.8	233.44	230.3	56.47	231.87	2.0378	0	0
TNS1	21782	22879	23559	23309	458.39	453.17	978.38	986.22	455.78	982.3	1.1078	0	0
RND3	1218	1338	7968	7785	25.63	26.5	330.9	329.39	26.065	330.145	3.6629	0	0
NR4A2	386	363	6244	5664	8.12	7.19	259.31	239.65	7.655	249.48	5.0264	0	0
DAPL1	54	54	2281	2047	1.14	1.07	94.73	86.61	1.105	90.67	6.3585	0	0
ITGB6	1251	1210	6734	7043	26.33	23.97	279.66	297.99	25.15	288.825	3.5216	0	0
NFE2L2	4300	4720	16561	16942	90.49	93.49	687.76	716.82	91.99	702.29	2.9325	0	0
FKBP7	1476	1342	4366	4526	31.06	26.58	181.32	191.5	28.82	186.41	2.6933	0	0
FRZB	33372	35931	81430	80432	702.3	711.69	3381.72	3403.12	706.995	3392.42	2.2625	0	0
FN1	24382	25148	73854	72473	513.11	498.11	3067.09	3066.37	505.61	3066.73	2.6006	0	0
ERBB4	26441	29185	126	148	556.44	578.07	5.23	6.26	567.255	5.745	-6.6255	0	0
MAP2	12987	14065	522	506	273.31	278.59	21.68	21.41	275.95	21.545	-3.679	0	0
MAP3K13	8780	9610	202	232	184.77	190.35	8.39	9.82	187.56	9.105	-4.3645	0	0
EEF1B2	20529	21639	25690	24643	432.02	428.61	1066.88	1042.66	430.315	1054.77	1.2935	0	0
IDH1	13483	14493	640	698	283.74	287.07	26.58	29.53	285.405	28.055	-3.3467	0	0
MFSD6	15162	15881	412	398	319.08	314.56	17.11	16.84	316.82	16.975	-4.2222	0	0
FAM234A	13973	14259	463	503	294.06	282.43	19.23	21.28	288.245	20.255	-3.8309	0	0
NDUFB7	148	176	2925	2941	3.11	3.49	121.47	124.44	3.3	122.955	5.2195	0	0
EIF3B	7194	7892	10174	9927	151.39	156.32	422.52	420.02	153.855	421.27	1.4532	0	0
PDGFA	996	998	5048	5135	20.96	19.77	209.64	217.26	20.365	213.45	3.3897	0	0
FAM20C	2697	2638	6122	5969	56.76	52.25	254.24	252.55	54.505	253.395	2.2169	0	0
SCNN1B	2728	2804	14511	14019	57.41	55.54	602.63	593.15	56.475	597.89	3.4042	0	0
CREBBP	5337	5616	9795	9304	112.31	111.24	406.78	393.66	111.775	400.22	1.8402	0	0
BRICD5	20897	21893	42722	41790	439.77	433.64	1774.21	1768.16	436.705	1771.18	2.02	0	0
RPS2	28677	29664	137322	125819	603.49	587.56	5702.86	5323.46	595.525	5513.16	3.2106	0	0
NOXO1	5038	5454	10509	9987	106.02	108.03	436.43	422.55	107.025	429.49	2.0047	0	0
NME2	14937	15315	28604	27662	314.34	303.35	1187.9	1170.39	308.845	1179.14	1.9328	0	0
ALDOA	1565	1601	26078	23742	32.93	31.71	1083	1004.54	32.32	1043.77	5.0132	0	0
NMRAL1	16733	17580	574	539	352.14	348.21	23.84	22.81	350.175	23.325	-3.9081	0	0
PPP1R1B	705	799	10377	9623	14.84	15.83	430.95	407.15	15.335	419.05	4.7722	0	0
DNAJC5	859	1002	3453	3272	18.08	19.85	143.4	138.44	18.965	140.92	2.8935	0	0
FUS	12146	11999	37022	34874	255.61	237.67	1537.49	1475.54	246.64	1506.52	2.6107	0	0
B2M	114824	122019	4572	4918	2416.42	2416.86	189.87	208.08	2416.64	198.975	-3.6023	0	0
MGRN1	5429	5604	12232	11595	114.25	111	507.98	490.59	112.625	499.285	2.1483	0	0
ACIN1	5741	5766	8340	8228	120.82	114.21	346.35	348.13	117.515	347.24	1.5631	5.31936e-308	1.14371e-306
FAT4	1503	1638	3777	3763	31.63	32.44	156.86	159.21	32.035	158.035	2.3025	6.60095e-308	1.41646e-306
EIF4G3	7937	8389	10180	9827	167.03	166.16	422.77	415.79	166.595	419.28	1.3316	5.8502e-307	1.25289e-305
HYOU1	15073	15595	1013	965	317.2	308.89	42.07	40.83	313.045	41.45	-2.9169	1.08888e-305	2.32737e-304
FOXP4	2126	2245	4398	4442	44.74	44.47	182.65	187.94	44.605	185.295	2.0545	1.1127e-305	2.37362e-304
TLR5	353	414	2289	2625	7.43	8.2	95.06	111.07	7.815	103.065	3.7212	5.41445e-304	1.15275e-302
MATR3	16330	17742	1295	1276	343.66	351.42	53.78	53.99	347.54	53.885	-2.6892	1.84407e-303	3.91838e-302
FLNB	55115	57684	46472	45350	1159.87	1142.56	1929.94	1918.78	1151.21	1924.36	0.7412	2.83665e-303	6.01569e-302
NNT	4607	4968	6915	6827	96.95	98.4	287.17	288.85	97.675	288.01	1.5601	3.40938e-303	7.21619e-302
SMURF2	2217	2217	4718	4609	46.66	43.91	195.93	195.01	45.285	195.47	2.1098	4.17573e-303	8.82103e-302
MSTO1	921	1018	4159	3518	19.38	20.16	172.72	148.85	19.77	160.785	3.0237	4.24266e-303	8.94502e-302
GALNT18	1003	1253	3721	3886	21.11	24.82	154.53	164.42	22.965	159.475	2.7958	4.46149e-301	9.38815e-300
USH1C	13495	14800	14881	14536	284	293.15	617.99	615.03	288.575	616.51	1.0952	4.76768e-301	1.00131e-299
PROM1	7606	8138	128	129	160.06	161.19	5.32	5.46	160.625	5.39	-4.8973	5.0196e-301	1.05218e-299
SNAP25	8129	8820	10483	10076	171.07	174.7	435.35	426.32	172.885	430.835	1.3173	2.29089e-300	4.79277e-299
IGSF10	1639	1660	3875	3892	34.49	32.88	160.93	164.67	33.685	162.8	2.2729	2.2975e-300	4.79736e-299
ISYNA1	28671	29379	26739	26340	603.37	581.92	1110.45	1114.46	592.645	1112.45	0.9085	3.63672e-300	7.57918e-299
PTPRN2	9499	10039	268	206	199.9	198.84	11.13	8.72	199.37	9.925	-4.3282	3.94771e-300	8.21155e-299
TEAD4	1737	1736	4297	4073	36.55	34.39	178.45	172.33	35.47	175.39	2.3059	4.12489e-300	8.56367e-299
SLC23A2	8582	9483	249	270	180.6	187.83	10.34	11.42	184.215	10.88	-4.0816	9.79713e-300	2.0301e-298
DTX4	9316	9706	241	290	196.05	192.25	10.01	12.27	194.15	11.14	-4.1234	2.39671e-299	4.95686e-298
PKLR	87297	92061	13854	13389	1837.13	1823.47	575.34	566.5	1830.3	570.92	-1.6807	3.52321e-299	7.27281e-298
PAFAH1B1	16426	17650	1295	1331	345.68	349.6	53.78	56.32	347.64	55.05	-2.6588	1.32108e-298	2.72187e-297
BSG	98170	101370	15512	15513	2065.94	2007.86	644.2	656.36	2036.9	650.28	-1.6472	1.54393e-298	3.175e-297
SOX2	5172	5316	8158	7662	108.84	105.3	338.79	324.18	107.07	331.485	1.6304	1.78255e-298	3.65878e-297
TPD52L2	8179	8652	9955	9765	172.12	171.37	413.42	413.16	171.745	413.29	1.2669	2.99122e-298	6.12804e-297
MGLL	7894	8323	9885	9599	166.13	164.86	410.52	406.14	165.495	408.33	1.3029	4.18297e-298	8.55342e-297
IQCE	7530	8294	107	92	158.47	164.28	4.44	3.89	161.375	4.165	-5.276	1.13963e-297	2.32596e-296
MAP3K15	47	63	1709	1736	0.99	1.25	70.97	73.45	1.12	72.21	6.0106	3.92038e-297	7.98639e-296
VEGFA	500	441	2611	2517	10.52	8.73	108.43	106.5	9.625	107.465	3.4809	2.36169e-296	4.80211e-295
MMP15	16465	17229	1289	1304	346.5	341.26	53.53	55.17	343.88	54.35	-2.6616	8.34384e-296	1.69341e-294
EVL	3937	4134	7035	6504	82.85	81.88	292.16	275.19	82.365	283.675	1.7841	2.02699e-295	4.10617e-294
RNF150	10760	11240	522	504	226.44	222.63	21.68	21.32	224.535	21.5	-3.3845	2.08398e-295	4.21374e-294
PCSK1	22308	24505	12	26	469.46	485.38	0.5	1.1	477.42	0.8	-9.221	4.4226e-294	8.92577e-293
RPS15	25831	26093	29816	27648	543.6	516.83	1238.23	1169.8	530.215	1204.02	1.1832	8.88268e-294	1.78939e-292
SMAD6	2516	2735	6060	5385	52.95	54.17	251.67	227.84	53.56	239.755	2.1623	1.64639e-293	3.31046e-292
PCBP2	13211	13867	478	598	278.02	274.67	19.85	25.3	276.345	22.575	-3.6137	1.72695e-293	3.46603e-292
SCG3	9763	10454	416	429	205.46	207.06	17.28	18.15	206.26	17.715	-3.5414	1.81139e-293	3.6288e-292
EGFR	9870	10756	441	446	207.71	213.05	18.31	18.87	210.38	18.59	-3.5004	3.70766e-293	7.41396e-292
NTN3	747	901	2937	3029	15.72	17.85	121.97	128.16	16.785	125.065	2.8974	6.28056e-293	1.25357e-291
ANXA7	3669	3779	5861	6004	77.21	74.85	243.4	254.03	76.03	248.715	1.7099	1.64156e-292	3.27046e-291
ARL2	78	90	1776	1588	1.64	1.78	73.76	67.19	1.71	70.475	5.365	2.13351e-292	4.24279e-291
PAPSS1	27153	28319	2555	2768	571.42	560.92	106.11	117.12	566.17	111.615	-2.3427	6.50339e-291	1.29093e-289
SLC45A1	7287	8132	98	90	153.35	161.07	4.07	3.81	157.21	3.94	-5.3184	3.36134e-290	6.66012e-289
KIF1A	23953	24500	2250	2334	504.08	485.28	93.44	98.75	494.68	96.095	-2.364	3.43379e-290	6.79127e-289
AGPAT1	79	70	1585	1620	1.66	1.39	65.82	68.54	1.525	67.18	5.4612	1.21125e-289	2.39122e-288
SNED1	8709	8919	11883	11069	183.28	176.66	493.49	468.33	179.97	480.91	1.418	1.33581e-289	2.63235e-288
EIF2S2	3463	3974	6439	6200	72.88	78.71	267.41	262.33	75.795	264.87	1.8051	1.79408e-289	3.52901e-288
NBL1	16576	16952	18505	17539	348.83	335.77	768.5	742.08	342.3	755.29	1.1418	2.92834e-289	5.74972e-288
JPH2	108	92	1609	1758	2.27	1.82	66.82	74.38	2.045	70.6	5.1095	7.01018e-289	1.37394e-287
SDC4	17682	19412	1496	1398	372.11	384.5	62.13	59.15	378.305	60.64	-2.6412	2.99044e-288	5.85048e-287
SOX21	1263	1231	3729	3480	26.58	24.38	154.86	147.24	25.48	151.05	2.5676	5.435e-288	1.06139e-286
RIBC1	379	531	2860	2748	7.98	10.52	118.77	116.27	9.25	117.52	3.6673	6.88377e-288	1.3419e-286
DOCK3	14118	15046	1026	993	297.11	298.02	42.61	42.01	297.565	42.31	-2.8141	1.1889e-287	2.31346e-286
ALAS1	3882	3883	6481	6252	81.69	76.91	269.15	264.53	79.3	266.84	1.7506	1.57709e-287	3.06333e-286
MAN1A2	3102	3378	5305	5317	65.28	66.91	220.31	224.96	66.095	222.635	1.7521	3.74268e-287	7.2568e-286
CHST1	1289	1316	3459	3330	27.13	26.07	143.65	140.89	26.6	142.27	2.4191	2.54214e-286	4.92024e-285
PPM1H	7239	7719	79	84	152.34	152.89	3.28	3.55	152.615	3.415	-5.4819	3.22902e-284	6.23856e-283
TSPAN18	476	582	2612	2426	10.02	11.53	108.47	102.65	10.775	105.56	3.2923	3.99213e-284	7.69922e-283
ADAMTS1	3679	3624	6567	6225	77.42	71.78	272.72	263.38	74.6	268.05	1.8453	7.64614e-284	1.47202e-282
MIGA2	8381	9292	293	287	176.37	184.05	12.17	12.14	180.21	12.155	-3.8901	2.93103e-283	5.63277e-282
AQP1	863	960	3200	2908	18.16	19.01	132.89	123.04	18.585	127.965	2.7835	4.67084e-283	8.96041e-282
EPS8L2	19737	20278	1774	1724	415.36	401.65	73.67	72.94	408.505	73.305	-2.4784	5.40839e-283	1.0357e-281
CEBPB	947	1047	2915	2920	19.93	20.74	121.06	123.55	20.335	122.305	2.5884	7.23239e-283	1.38256e-281
RUVBL1	3192	3358	5258	5346	67.17	66.51	218.36	226.19	66.84	222.275	1.7336	1.8821e-282	3.59154e-281
WSCD2	7301	7573	86	98	153.65	150	3.57	4.15	151.825	3.86	-5.2977	3.03284e-282	5.7773e-281
KIFC1	8061	7910	64	82	169.64	156.68	2.66	3.47	163.16	3.065	-5.7343	3.4661e-281	6.59106e-280
HNRNPM	9571	10336	10718	10663	201.42	204.73	445.11	451.16	203.075	448.135	1.1419	3.50495e-280	6.65329e-279
APBA1	7309	7884	9149	9662	153.81	156.16	379.95	408.8	154.985	394.375	1.3474	4.09691e-280	7.76339e-279
CCDC28B	550	602	2297	2312	11.57	11.92	95.39	97.82	11.745	96.605	3.0401	1.22422e-279	2.31579e-278
DSTN	26679	28498	3036	3135	561.45	564.47	126.08	132.64	562.96	129.36	-2.1216	2.83591e-279	5.35519e-278
RPS21	4526	4893	7093	6704	95.25	96.92	294.57	283.65	96.085	289.11	1.5892	3.58463e-279	6.75728e-278
GPAA1	404	432	2209	2049	8.5	8.56	91.74	86.69	8.53	89.215	3.3867	5.43871e-279	1.02346e-277
ADAMTSL5	490	496	2171	2226	10.31	9.82	90.16	94.18	10.065	92.17	3.195	6.24059e-279	1.17232e-277
PPP1R12B	7589	7747	167	167	159.71	153.45	6.94	7.07	156.58	7.005	-4.4824	9.43622e-279	1.76958e-277
ADD3	17452	20247	20714	20387	367.27	401.04	860.23	862.58	384.155	861.405	1.165	3.49518e-278	6.54321e-277
GLT8D1	2806	2844	4937	5039	59.05	56.33	205.03	213.2	57.69	209.115	1.8579	7.05988e-278	1.31938e-276
RAB19	1815	1931	4015	3860	38.2	38.25	166.74	163.32	38.225	165.03	2.1101	1.45175e-277	2.70844e-276
SASH1	8670	9076	304	266	182.46	179.77	12.62	11.25	181.115	11.935	-3.9236	1.9275e-277	3.58985e-276
LZTS3	7917	8682	53	44	166.61	171.97	2.2	1.86	169.29	2.03	-6.3819	1.06788e-276	1.98545e-275
TMEM30A	20591	21822	2004	1879	433.33	432.23	83.22	79.5	432.78	81.36	-2.4112	1.76864e-275	3.28271e-274
CXCL14	31620	32990	2820	3177	665.43	653.44	117.11	134.42	659.435	125.765	-2.3905	2.98499e-275	5.53089e-274
DEPDC7	719	970	3528	3481	15.13	19.21	146.51	147.28	17.17	146.895	3.0968	1.27838e-274	2.36467e-273
NRP1	6929	7881	99	112	145.82	156.1	4.11	4.74	150.96	4.425	-5.0923	1.5336e-274	2.83195e-273
COL28A1	31	56	1702	1747	0.65	1.11	70.68	73.92	0.88	72.3	6.3603	2.56556e-274	4.72951e-273
COL5A1	24794	26597	25334	23804	521.78	526.81	1052.1	1007.16	524.295	1029.63	0.9737	2.99263e-274	5.50746e-273
BAG3	7614	8021	203	177	160.23	158.87	8.43	7.49	159.55	7.96	-4.3251	6.59835e-274	1.21226e-272
FXYD6	7953	8447	203	156	167.37	167.31	8.43	6.6	167.34	7.515	-4.4769	7.65749e-273	1.40448e-271
VAT1L	643	653	2374	2498	13.53	12.93	98.59	105.69	13.23	102.14	2.9487	1.51013e-272	2.7651e-271
MTMR3	14370	14448	964	958	302.41	286.17	40.03	40.53	294.29	40.28	-2.8691	3.88391e-272	7.09957e-271
DLG5	2459	2511	4672	4520	51.75	49.74	194.02	191.24	50.745	192.63	1.9245	6.30995e-272	1.15149e-270
FUCA2	2680	2937	4961	4783	56.4	58.17	206.03	202.37	57.285	204.2	1.8338	9.24491e-272	1.68425e-270
NEO1	8136	8439	9560	9395	171.22	167.15	397.02	397.51	169.185	397.265	1.2315	3.60526e-271	6.5571e-270
AGBL3	113	87	1769	1591	2.38	1.72	73.46	67.32	2.05	70.39	5.1017	4.88118e-271	8.86285e-270
PSAP	132821	143418	20703	22004	2795.16	2840.71	859.78	931	2817.93	895.39	-1.6541	6.13568e-271	1.11221e-269
AEBP2	964	1031	2858	2797	20.29	20.42	118.69	118.34	20.355	118.515	2.5416	4.78161e-270	8.65312e-269
TBCD	4663	4939	6745	6508	98.13	97.83	280.11	275.36	97.98	277.735	1.5031	1.32151e-269	2.38751e-268
BCAT1	1769	1908	3937	3765	37.23	37.79	163.5	159.3	37.51	161.4	2.1053	1.36241e-268	2.45732e-267
MBNL3	7072	8111	85	115	148.83	160.66	3.53	4.87	154.745	4.2	-5.2034	1.43714e-268	2.58781e-267
GCNT2	29	30	1878	1973	0.61	0.59	77.99	83.48	0.6	80.735	7.0721	1.53349e-268	2.75673e-267
TPM2	8340	8763	314	309	175.51	173.57	13.04	13.07	174.54	13.055	-3.7409	2.35626e-268	4.22881e-267
PANK3	8553	9576	295	240	179.99	189.67	12.25	10.15	184.83	11.2	-4.0446	9.44206e-268	1.69178e-266
TBC1D30	9876	10600	409	471	207.84	209.96	16.99	19.93	208.9	18.46	-3.5003	1.10706e-267	1.98031e-266
TMC5	623	732	2463	2510	13.11	14.5	102.29	106.2	13.805	104.245	2.9167	1.94028e-267	3.46507e-266
SVOPL	62	71	1616	1447	1.3	1.41	67.11	61.22	1.355	64.165	5.5654	2.64929e-267	4.72349e-266
ENDOD1	3424	3725	5489	5398	72.06	73.78	227.95	228.39	72.92	228.17	1.6457	2.92598e-267	5.20824e-266
HERC1	10876	11546	11802	11460	228.88	228.69	490.13	484.88	228.785	487.505	1.0914	2.98222e-267	5.29967e-266
PGM2L1	18391	19898	1770	1812	387.03	394.12	73.51	76.67	390.575	75.09	-2.3789	3.17786e-267	5.6381e-266
SCP2	6622	7080	9109	8526	139.36	140.24	378.29	360.74	139.8	369.515	1.4023	3.9759e-267	7.04246e-266
TPI1	17487	18770	16449	16256	368.01	371.78	683.11	687.8	369.895	685.455	0.8899	6.13327e-267	1.08461e-265
CHRDL1	25084	26974	21663	21943	527.88	534.28	899.65	928.42	531.08	914.035	0.7833	7.20281e-267	1.27168e-265
NAGLU	4161	4169	6957	6485	87.57	82.58	288.92	274.38	85.075	281.65	1.7271	8.47037e-267	1.49304e-265
PDK3	9447	10431	460	472	198.81	206.61	19.1	19.97	202.71	19.535	-3.3753	2.24435e-266	3.94963e-265
AFF4	10737	11461	33	23	225.96	227.01	1.37	0.97	226.485	1.17	-7.5968	3.66258e-266	6.435e-265
CCDC50	6897	7232	138	141	145.14	143.25	5.73	5.97	144.195	5.85	-4.6234	6.24109e-266	1.09476e-264
AGO3	7643	8265	256	253	160.84	163.71	10.63	10.7	162.275	10.665	-3.9275	3.49541e-264	6.12149e-263
NEFL	16710	17274	16755	16166	351.65	342.15	695.82	683.99	346.9	689.905	0.9919	4.96095e-264	8.67408e-263
ISL1	1518	1949	4702	4686	31.95	38.6	195.27	198.27	35.275	196.77	2.4798	7.93503e-264	1.38519e-262
KCNS1	8366	8349	159	209	176.06	165.37	6.6	8.84	170.715	7.72	-4.4668	1.15968e-263	2.02116e-262
NECTIN1	9268	9893	441	405	195.04	195.95	18.31	17.14	195.495	17.725	-3.4633	1.23953e-263	2.15686e-262
POU3F4	4362	4209	6870	6832	91.8	83.37	285.3	289.07	87.585	287.185	1.7132	1.73927e-263	3.0216e-262
DBN1	2425	2601	4622	4408	51.03	51.52	191.95	186.5	51.275	189.225	1.8838	7.20205e-263	1.2492e-261
AFAP1	6536	7294	83	80	137.55	144.47	3.45	3.38	141.01	3.415	-5.3678	5.11849e-262	8.86388e-261
TMEM35B	1530	1471	4365	3885	32.2	29.14	181.27	164.38	30.67	172.825	2.4944	5.94107e-262	1.0272e-260
UBAP2L	4892	5164	6807	6590	102.95	102.28	282.69	278.83	102.615	280.76	1.4521	2.65344e-261	4.58046e-260
COL4A5	2290	2590	5325	4795	48.19	51.3	221.14	202.88	49.745	212.01	2.0915	3.34527e-261	5.76555e-260
EIF4G2	58419	62425	9455	9256	1229.4	1236.47	392.66	391.63	1232.93	392.145	-1.6526	1.14168e-260	1.96455e-259
GPX3	39425	40433	4809	4471	829.68	800.87	199.71	189.17	815.275	194.44	-2.068	7.45061e-260	1.28004e-258
ITGA7	810	653	3435	3411	17.05	12.93	142.65	144.32	14.99	143.485	3.2588	1.06918e-259	1.83398e-258
SLC38A6	7383	8360	217	186	155.37	165.59	9.01	7.87	160.48	8.44	-4.249	1.28339e-259	2.19797e-258
CACNA1D	11814	13272	14486	13640	248.62	262.88	601.59	577.12	255.75	589.355	1.2044	2.15838e-259	3.69067e-258
IRAK2	7788	8654	282	287	163.89	171.41	11.71	12.14	167.65	11.925	-3.8134	2.51309e-259	4.29044e-258
CTSS	9907	9938	460	453	208.49	196.84	19.1	19.17	202.665	19.135	-3.4048	7.68668e-259	1.31023e-257
IRF6	10345	10366	353	428	217.71	205.32	14.66	18.11	211.515	16.385	-3.6903	2.52979e-258	4.30541e-257
DHRS3	6776	7278	8319	8110	142.6	144.16	345.48	343.14	143.38	344.31	1.2639	4.80788e-258	8.16963e-257
DCHS1	3722	3918	5494	5567	78.33	77.6	228.16	235.54	77.965	231.85	1.5723	9.40672e-258	1.59591e-256
HNRNPD	4793	5257	6606	6572	100.87	104.13	274.34	278.06	102.5	276.2	1.4301	2.32735e-257	3.94233e-256
EPHA10	7342	7978	48	42	154.51	158.02	1.99	1.78	156.265	1.885	-6.3733	2.56772e-257	4.34273e-256
ACTR3	5504	5512	7512	7347	115.83	109.18	311.97	310.86	112.505	311.415	1.4688	2.57986e-257	4.35648e-256
GART	30	43	1738	1582	0.63	0.85	72.18	66.94	0.74	69.56	6.5546	3.02842e-256	5.10599e-255
CLMN	8801	9623	350	397	185.21	190.6	14.54	16.8	187.905	15.67	-3.5839	3.78091e-256	6.36483e-255
GAP43	78	100	1443	1393	1.64	1.98	59.93	58.94	1.81	59.435	5.0373	6.35968e-256	1.06894e-254
ANP32A	4025	4578	6326	6224	84.7	90.68	262.71	263.34	87.69	263.025	1.5847	7.3245e-256	1.2292e-254
SPRY4	613	741	2638	3048	12.9	14.68	109.55	128.96	13.79	119.255	3.1124	1.06304e-255	1.78124e-254
FAM124A	273	280	1817	1683	5.75	5.55	75.46	71.21	5.65	73.335	3.6982	3.96393e-255	6.6318e-254
PTPN13	2767	2757	4762	4916	58.23	54.61	197.76	208	56.42	202.88	1.8463	1.07457e-254	1.79503e-253
CERS2	12615	13085	820	731	265.48	259.18	34.05	30.93	262.33	32.49	-3.0133	1.56417e-254	2.60887e-253
GPAT4	2970	3155	6007	5359	62.5	62.49	249.47	226.74	62.495	238.105	1.9298	1.80763e-254	3.01031e-253
NOA1	2031	1999	4078	4049	42.74	39.59	169.36	171.32	41.165	170.34	2.0489	2.47434e-254	4.1143e-253
YPEL2	7642	8174	268	281	160.82	161.9	11.13	11.89	161.36	11.51	-3.8093	4.55741e-254	7.56642e-253
LRRC8A	16207	17515	1505	1439	341.07	346.92	62.5	60.88	343.995	61.69	-2.4793	8.38237e-254	1.38955e-252
TMEM98	1022	1193	2989	2992	21.51	23.63	124.13	126.59	22.57	125.36	2.4736	1.21314e-253	2.00797e-252
TNMD	10248	11109	598	622	215.66	220.04	24.83	26.32	217.85	25.575	-3.0905	3.75709e-253	6.20921e-252
MXI1	7464	7471	156	116	157.08	147.98	6.48	4.91	152.53	5.695	-4.7433	9.64937e-253	1.59229e-251
SLC35E3	7274	7935	245	230	153.08	157.17	10.17	9.73	155.125	9.95	-3.9626	2.33735e-252	3.85113e-251
DHRS11	361	418	1891	1908	7.6	8.28	78.53	80.73	7.94	79.63	3.3261	4.22286e-252	6.94724e-251
ICA1	2321	2691	4563	4700	48.84	53.3	189.5	198.86	51.07	194.18	1.9268	1.00621e-251	1.65286e-250
CLCA2	18499	20014	15	18	389.3	396.42	0.62	0.76	392.86	0.69	-9.1532	1.15168e-251	1.88896e-250
SLC25A39	4116	4225	5895	5845	86.62	83.69	244.81	247.3	85.155	246.055	1.5308	1.36684e-251	2.23848e-250
ERAP1	8540	9077	340	283	179.72	179.79	14.12	11.97	179.755	13.045	-3.7845	1.68554e-251	2.75627e-250
NBEAL1	12898	14244	781	889	271.43	282.13	32.43	37.61	276.78	35.02	-2.9825	1.749e-251	2.85574e-250
TDRP	3156	3706	5656	5777	66.42	73.41	234.89	244.43	69.915	239.66	1.7773	1.10812e-250	1.80661e-249
IDH2	7045	7745	8603	8407	148.26	153.41	357.27	355.7	150.835	356.485	1.2409	2.29724e-250	3.73965e-249
HNRNPA1	24308	25980	22215	21328	511.55	514.59	922.57	902.4	513.07	912.485	0.8306	3.19778e-250	5.19783e-249
MGARP	4442	4601	6092	6090	93.48	91.13	253	257.67	92.305	255.335	1.4679	3.46746e-250	5.62776e-249
PLEKHB2	20868	21872	2283	2241	439.16	433.22	94.81	94.82	436.19	94.815	-2.2018	1.05159e-249	1.7042e-248
SLC38A1	10674	11515	24	25	224.63	228.08	1	1.06	226.355	1.03	-7.7798	1.1438e-249	1.85088e-248
NF1	12028	12961	859	889	253.12	256.72	35.67	37.61	254.92	36.64	-2.7986	1.86602e-249	3.01507e-248
HEG1	23107	24022	20386	20000	486.28	475.81	846.61	846.21	481.045	846.41	0.8152	3.50609e-249	5.65663e-248
ATP1A1	286059	304060	219222	209618	6019.98	6022.58	9104.09	8869.04	6021.28	8986.57	0.5777	5.63108e-249	9.07155e-248
SERPINF2	18174	19074	12	21	382.46	377.8	0.5	0.89	380.13	0.695	-9.0953	1.62795e-248	2.61871e-247
CRYBG3	6876	7426	151	184	144.7	147.09	6.27	7.79	145.895	7.03	-4.3753	2.67596e-248	4.29817e-247
LBH	7225	7759	8668	8376	152.05	153.68	359.97	354.39	152.865	357.18	1.2244	4.29458e-248	6.88781e-247
RGCC	99	70	1479	1479	2.08	1.39	61.42	62.58	1.735	62	5.1593	2.62131e-246	4.19797e-245
TUFT1	1520	1673	3487	3347	31.99	33.14	144.81	141.61	32.565	143.21	2.1367	4.14876e-246	6.63435e-245
ARPC1B	6735	7038	7850	7922	141.73	139.4	326	335.18	140.565	330.59	1.2338	7.40689e-246	1.18271e-244
FEM1B	10596	10591	572	575	222.99	209.78	23.75	24.33	216.385	24.04	-3.1701	2.40916e-245	3.84121e-244
COLEC12	11739	12684	11664	11856	247.04	251.23	484.4	501.63	249.135	493.015	0.9847	1.45729e-244	2.32013e-243
LRRC8D	7232	7582	221	184	152.19	150.18	9.18	7.79	151.185	8.485	-4.1553	1.64595e-244	2.61665e-243
WAPL	6253	6728	87	109	131.59	133.26	3.61	4.61	132.425	4.11	-5.0099	2.00767e-244	3.18703e-243
RNF19A	3036	3187	4788	4758	63.89	63.13	198.84	201.31	63.51	200.075	1.6555	2.0695e-244	3.28039e-243
SLC30A10	29	43	1517	1503	0.61	0.85	63	63.59	0.73	63.295	6.4381	2.7598e-244	4.36821e-243
ROBO3	513	601	2138	2153	10.8	11.9	88.79	91.09	11.35	89.94	2.9863	4.06805e-244	6.42953e-243
BAHD1	6458	6489	73	80	135.91	128.53	3.03	3.38	132.22	3.205	-5.3665	7.23969e-244	1.14257e-242
FBXO45	6856	7076	147	176	144.28	140.16	6.1	7.45	142.22	6.775	-4.3918	1.41078e-243	2.22326e-242
AP3B2	13484	13661	1001	987	283.76	270.59	41.57	41.76	277.175	41.665	-2.7339	1.65423e-243	2.60314e-242
HSPA5	47877	50328	7265	6970	1007.55	996.86	301.71	294.9	1002.21	298.305	-1.7483	3.12291e-243	4.90718e-242
SHANK2	3933	4411	5829	5856	82.77	87.37	242.07	247.77	85.07	244.92	1.5256	3.93329e-243	6.17162e-242
CIDEA	7297	7786	185	132	153.56	154.22	7.68	5.58	153.89	6.63	-4.5367	1.31363e-242	2.05821e-241
EPHX3	48	53	1324	1472	1.01	1.05	54.98	62.28	1.03	58.63	5.8309	1.58411e-242	2.47843e-241
TTC14	2137	2329	3930	4065	44.97	46.13	163.21	171.99	45.55	167.6	1.8795	2.75209e-242	4.2996e-241
OGT	52429	56643	39640	40301	1103.34	1121.94	1646.21	1705.15	1112.64	1675.68	0.5908	1.41164e-241	2.20224e-240
ACBD3	4793	5103	6228	6365	100.87	101.08	258.64	269.31	100.975	263.975	1.3864	1.69134e-241	2.63481e-240
ATP6V0C	11931	12994	12172	11910	251.08	257.38	505.49	503.92	254.23	504.705	0.9893	3.43692e-241	5.34642e-240
P4HA1	22966	24484	2722	2788	483.31	484.96	113.04	117.96	484.135	115.5	-2.0675	1.38128e-240	2.14562e-239
SRSF7	3808	3836	5586	5550	80.14	75.98	231.98	234.82	78.06	233.4	1.5801	1.60033e-240	2.48233e-239
FOS	17801	18873	15972	15763	374.61	373.82	663.3	666.94	374.215	665.12	0.8297	3.43009e-240	5.31297e-239
KRTCAP3	194	187	1552	1464	4.08	3.7	64.45	61.94	3.89	63.195	4.022	5.47259e-240	8.46459e-239
BORCS6	6871	6909	164	178	144.6	136.85	6.81	7.53	140.725	7.17	-4.2948	5.63176e-240	8.69838e-239
RASL11B	6293	6885	7625	7574	132.43	136.37	316.66	320.46	134.4	318.56	1.245	6.11378e-240	9.42946e-239
GPC2	5945	6478	89	97	125.11	128.31	3.7	4.1	126.71	3.9	-5.0219	2.52725e-239	3.89232e-238
KLF10	2168	2298	3884	3991	45.62	45.52	161.3	168.86	45.57	165.08	1.857	3.21931e-239	4.95117e-238
ELOVL4	2105	2277	3843	3984	44.3	45.1	159.6	168.56	44.7	164.08	1.8761	8.68343e-238	1.33359e-236
JAKMIP1	225	336	2037	2141	4.74	6.66	84.59	90.59	5.7	87.59	3.9417	9.94385e-238	1.525e-236
CSTB	4932	5346	7018	6595	103.79	105.89	291.45	279.04	104.84	285.245	1.444	2.08163e-237	3.18792e-236
CEP41	8671	9064	9287	9635	182.48	179.53	385.68	407.66	181.005	396.67	1.1319	1.14725e-236	1.75448e-235
SF3B1	26968	29604	3501	3556	567.53	586.37	145.39	150.46	576.95	147.925	-1.9636	2.1881e-236	3.34155e-235
GIPR	340	302	1913	1800	7.16	5.98	79.45	76.16	6.57	77.805	3.5659	2.22238e-236	3.38913e-235
DPP10	4736	5091	6171	6391	99.67	100.84	256.28	270.41	100.255	263.345	1.3933	3.66839e-236	5.58645e-235
CPNE1	5069	5473	6472	6440	106.67	108.4	268.78	272.48	107.535	270.63	1.3315	9.70917e-236	1.4765e-234
EEA1	6004	6723	127	132	126.35	133.16	5.27	5.58	129.755	5.425	-4.58	1.33909e-235	2.03354e-234
SESN3	6950	7533	251	239	146.26	149.21	10.42	10.11	147.735	10.265	-3.8472	1.39949e-235	2.12229e-234
TTYH3	11399	11962	732	797	239.89	236.93	30.4	33.72	238.41	32.06	-2.8946	1.53703e-235	2.32762e-234
DOK1	1116	1000	3238	3144	23.49	19.81	134.47	133.02	21.65	133.745	2.627	5.96994e-235	9.02807e-234
BCR	7101	7640	268	267	149.44	151.33	11.13	11.3	150.385	11.215	-3.7452	1.02126e-234	1.54225e-233
PAFAH1B2	14501	15501	1341	1306	305.17	307.03	55.69	55.26	306.1	55.475	-2.4641	1.51573e-234	2.2858e-233
ARHGEF17	5003	5257	6744	6428	105.29	104.13	280.07	271.97	104.71	276.02	1.3984	4.64727e-234	6.99862e-233
WBP2	16750	17398	1608	1520	352.5	344.61	66.78	64.31	348.555	65.545	-2.4108	4.85822e-234	7.30617e-233
TMEM229B	6280	6588	159	156	132.16	130.49	6.6	6.6	131.325	6.6	-4.3145	4.89018e-234	7.34406e-233
ACSBG1	1274	1529	3315	3405	26.81	30.29	137.67	144.07	28.55	140.87	2.3028	5.32819e-234	7.99081e-233
DISP3	16133	17097	16	16	339.51	338.64	0.66	0.68	339.075	0.67	-8.9832	6.33888e-234	9.49346e-233
ADARB1	793	787	2463	2371	16.69	15.59	102.29	100.32	16.14	101.305	2.65	7.24882e-234	1.08413e-232
DHODH	1587	1483	3594	3630	33.4	29.37	149.26	153.59	31.385	151.425	2.2705	8.28982e-234	1.23811e-232
RDX	13621	13936	905	769	286.65	276.03	37.58	32.54	281.34	35.06	-3.0044	9.6715e-233	1.44249e-231
RCAN3	6371	7286	80	120	134.07	144.32	3.32	5.08	139.195	4.2	-5.0506	7.36627e-232	1.09716e-230
ERLIN2	8286	9111	358	406	174.38	180.46	14.87	17.18	177.42	16.025	-3.4688	7.99647e-232	1.18939e-230
GALC	3034	3482	5039	5087	63.85	68.97	209.27	215.23	66.41	212.25	1.6763	9.46912e-232	1.40651e-230
PEPD	10479	11337	731	729	220.53	224.55	30.36	30.84	222.54	30.6	-2.8625	1.27522e-231	1.89157e-230
UPB1	25	48	1466	1435	0.53	0.95	60.88	60.72	0.74	60.8	6.3604	1.57913e-231	2.33917e-230
PTEN	10026	10566	623	651	210.99	209.28	25.87	27.54	210.135	26.705	-2.9761	2.85896e-231	4.22923e-230
FAM171A2	2226	2074	4701	4429	46.85	41.08	195.23	187.39	43.965	191.31	2.1215	2.91223e-231	4.30217e-230
CAMK1D	6194	7006	101	66	130.35	138.77	4.19	2.79	134.56	3.49	-5.2689	3.69493e-231	5.45102e-230
CADM1	6765	7114	7650	7681	142.37	140.91	317.7	324.99	141.64	321.345	1.1819	1.80228e-230	2.65524e-229
AGPAT3	7241	7349	8643	8326	152.38	145.56	358.94	352.28	148.97	355.61	1.2553	2.39256e-230	3.5201e-229
POU3F3	1008	1064	2646	2585	21.21	21.07	109.89	109.37	21.14	109.63	2.3746	3.90611e-230	5.73918e-229
VIM	22013	22799	22612	20907	463.25	451.58	939.06	884.59	457.415	911.825	0.9953	5.73174e-230	8.41017e-229
IPO4	11372	12234	648	754	239.32	242.32	26.91	31.9	240.82	29.405	-3.0338	9.30615e-229	1.36365e-227
ADAMTS2	6131	6582	43	66	129.02	130.37	1.79	2.79	129.695	2.29	-5.8236	1.44456e-228	2.11389e-227
TOX	523	678	2359	2383	11.01	13.43	97.97	100.83	12.22	99.4	3.024	7.43355e-228	1.08632e-226
ZBTB33	6172	6450	142	159	129.89	127.76	5.9	6.73	128.825	6.315	-4.3505	1.1709e-227	1.70882e-226
FHL2	6189	6292	99	124	130.24	124.63	4.11	5.25	127.435	4.68	-4.7671	1.20374e-227	1.7544e-226
PLCE1	5955	6909	138	123	125.32	136.85	5.73	5.2	131.085	5.465	-4.5841	1.80101e-227	2.62136e-226
SGMS2	5948	6894	73	102	125.17	136.55	3.03	4.32	130.86	3.675	-5.1541	8.68988e-227	1.26312e-225
MRPS35	955	988	2941	2625	20.1	19.57	122.14	111.07	19.835	116.605	2.5555	1.40914e-226	2.04551e-225
FREM1	3375	3439	4979	4939	71.03	68.12	206.77	208.97	69.575	207.87	1.579	2.74132e-226	3.974e-225
CEP95	471	568	2211	2029	9.91	11.25	91.82	85.85	10.58	88.835	3.0698	5.57786e-226	8.07526e-225
EMILIN3	319	290	1675	1711	6.71	5.74	69.56	72.39	6.225	70.975	3.5112	9.43447e-226	1.36404e-224
KANK3	14928	15158	1060	1189	314.15	300.24	44.02	50.31	307.195	47.165	-2.7034	1.40975e-225	2.03552e-224
SAMD12	5775	6111	100	115	121.53	121.04	4.15	4.87	121.285	4.51	-4.7491	2.09499e-225	3.0209e-224
DRP2	38820	40241	5531	5254	816.95	797.06	229.7	222.3	807.005	226	-1.8363	3.63191e-225	5.23015e-224
TTC7B	1092	1289	2997	2902	22.98	25.53	124.46	122.79	24.255	123.625	2.3496	5.41501e-225	7.78758e-224
PLCD3	1657	1589	3556	3462	34.87	31.47	147.68	146.48	33.17	147.08	2.1487	7.27211e-225	1.04445e-223
YWHAH	4826	4890	7258	6643	101.56	96.86	301.42	281.07	99.21	291.245	1.5537	7.87424e-225	1.12944e-223
USP53	847	841	2470	2383	17.82	16.66	102.58	100.83	17.24	101.705	2.5606	7.99079e-225	1.14464e-223
PFKFB2	8074	8586	417	411	169.91	170.06	17.32	17.39	169.985	17.355	-3.292	3.32073e-224	4.75052e-223
PLAT	2444	2758	4411	4240	51.43	54.63	183.18	179.4	53.03	181.29	1.7734	4.35785e-224	6.22599e-223
ARVCF	19947	20568	2123	2207	419.78	407.39	88.17	93.38	413.585	90.775	-2.1878	8.9771e-224	1.28086e-222
GLB1L	1815	1823	3518	3770	38.2	36.11	146.1	159.51	37.155	152.805	2.0401	1.19305e-223	1.70001e-222
FRYL	9127	10211	10248	9962	192.07	202.25	425.59	421.5	197.16	423.545	1.1031	1.67569e-223	2.38462e-222
AQP8	15	7	4318	4290	0.32	0.14	179.32	181.51	0.23	180.415	9.6155	1.91606e-223	2.72311e-222
TNFRSF19	2675	3016	4975	4604	56.29	59.74	206.61	194.8	58.015	200.705	1.7906	2.58166e-223	3.66427e-222
IMMT	8048	8616	9674	9033	169.37	170.66	401.75	382.19	170.015	391.97	1.2051	2.79191e-223	3.95751e-222
ACADSB	4223	4571	5638	5591	88.87	90.54	234.14	236.56	89.705	235.35	1.3915	1.72073e-222	2.43595e-221
B3GNT7	6207	6048	66	85	130.62	119.79	2.74	3.6	125.205	3.17	-5.3037	2.21594e-222	3.1329e-221
DNAJB14	7373	7993	328	341	155.16	158.32	13.62	14.43	156.74	14.025	-3.4823	2.3954e-222	3.38222e-221
COX4I1	14824	15195	1309	1352	311.96	300.97	54.36	57.2	306.465	55.78	-2.4579	3.55304e-222	5.01024e-221
AGL	2726	2993	4408	4332	57.37	59.28	183.06	183.29	58.325	183.175	1.651	1.04235e-221	1.46794e-220
ST6GAL1	10640	10979	13	27	223.91	217.46	0.54	1.14	220.685	0.84	-8.0374	2.77241e-221	3.89932e-220
TAP2	7097	7161	257	236	149.35	141.84	10.67	9.99	145.595	10.33	-3.817	5.91924e-221	8.3145e-220
LRRK2	1093	1234	2735	2915	23	24.44	113.58	123.34	23.72	118.46	2.3202	6.64362e-221	9.31995e-220
OXR1	6114	6637	7168	7097	128.67	131.46	297.68	300.28	130.065	298.98	1.2008	8.46862e-221	1.18648e-219
BCAN	5874	6395	158	159	123.62	126.67	6.56	6.73	125.145	6.645	-4.2352	1.53269e-220	2.14457e-219
CPLANE1	1235	1288	3094	2847	25.99	25.51	128.49	120.46	25.75	124.475	2.2732	2.09018e-220	2.92087e-219
DCAF7	3487	3657	5576	5146	73.38	72.43	231.57	217.73	72.905	224.65	1.6236	2.43379e-220	3.39667e-219
FLRT2	1192	1285	2739	2845	25.09	25.45	113.75	120.37	25.27	117.06	2.2118	3.44902e-220	4.80737e-219
EMP1	726	879	2577	2976	15.28	17.41	107.02	125.92	16.345	116.47	2.833	6.05562e-220	8.42974e-219
GPX1	11484	12450	864	774	241.68	246.6	35.88	32.75	244.14	34.315	-2.8308	9.68222e-220	1.34609e-218
SLC13A3	5513	5767	79	78	116.02	114.23	3.28	3.3	115.125	3.29	-5.129	2.92621e-219	4.06302e-218
WDR31	376	396	1668	1788	7.91	7.84	69.27	75.65	7.875	72.46	3.2018	4.3892e-219	6.08658e-218
EMILIN1	2078	2035	3924	3789	43.73	40.31	162.96	160.31	42.02	161.635	1.9436	4.45875e-219	6.17515e-218
MATN2	3766	4059	5151	5190	79.25	80.4	213.92	219.59	79.825	216.755	1.4412	8.54528e-219	1.18197e-217
AGR3	51874	56695	7699	8205	1091.66	1122.97	319.73	347.16	1107.32	333.445	-1.7315	9.93549e-219	1.37251e-217
TACC2	6116	6373	7095	7000	128.71	126.23	294.65	296.17	127.47	295.41	1.2126	1.17645e-218	1.62312e-217
HTT	7818	8603	8726	8530	164.53	170.4	362.38	360.91	167.465	361.645	1.1107	1.36856e-218	1.88577e-217
HACD3	9784	10854	676	640	205.9	214.99	28.07	27.08	210.445	27.575	-2.932	6.34088e-218	8.72614e-217
PIEZO2	1705	1888	3413	3701	35.88	37.4	141.74	156.59	36.64	149.165	2.0254	1.02417e-217	1.40765e-216
PACSIN3	3482	3425	5183	5139	73.28	67.84	215.25	217.43	70.56	216.34	1.6164	1.95215e-217	2.6797e-216
SLC7A1	5717	6262	42	58	120.31	124.03	1.74	2.45	122.17	2.095	-5.8658	2.57155e-217	3.5255e-216
CDS2	10847	11250	740	790	228.27	222.83	30.73	33.43	225.55	32.08	-2.8137	2.61403e-217	3.57921e-216
WSCD1	2278	2622	4107	4161	47.94	51.93	170.56	176.05	49.935	173.305	1.7952	1.05157e-216	1.43802e-215
ZBTB7B	383	374	1726	1681	8.06	7.41	71.68	71.12	7.735	71.4	3.2065	1.59087e-216	2.17279e-215
UCK1	3739	3896	5086	5273	78.69	77.17	211.22	223.1	77.93	217.16	1.4785	2.47321e-216	3.37363e-215
RABGEF1	6628	7327	261	236	139.48	145.13	10.84	9.99	142.305	10.415	-3.7723	3.66602e-216	4.99443e-215
SH3PXD2A	6038	6833	177	146	127.07	135.34	7.35	6.18	131.205	6.765	-4.2776	2.75146e-215	3.74378e-214
GOLPH3L	1381	1515	2948	2971	29.06	30.01	122.43	125.7	29.535	124.065	2.0706	2.77699e-215	3.77379e-214
DNAJC10	5731	5922	132	117	120.61	117.3	5.48	4.95	118.955	5.215	-4.5116	6.13022e-215	8.32024e-214
TIMP3	25716	27348	3457	3307	541.18	541.69	143.57	139.92	541.435	141.745	-1.9335	1.202e-214	1.62937e-213
TCN2	1718	1701	3315	3410	36.15	33.69	137.67	144.28	34.92	140.975	2.0133	3.04332e-214	4.12025e-213
CBX6	7595	8192	317	366	159.83	162.26	13.16	15.49	161.045	14.325	-3.4909	6.22877e-214	8.42241e-213
LYPD6	777	885	2434	2287	16.35	17.53	101.08	96.76	16.94	98.92	2.5458	8.82164e-213	1.19136e-211
PHC1	3286	3576	5079	4797	69.15	70.83	210.93	202.96	69.99	206.945	1.564	9.16057e-213	1.2356e-211
KCNAB1	5332	6063	63	55	112.21	120.09	2.62	2.33	116.15	2.475	-5.5524	1.07833e-212	1.45267e-211
FUBP1	15050	16359	1504	1564	316.72	324.03	62.46	66.17	320.375	64.315	-2.3165	2.76702e-212	3.72297e-211
TMX1	103	83	1204	1325	2.17	1.64	50	56.06	1.905	53.03	4.7989	1.10532e-211	1.48534e-210
B3GAT2	9402	9349	537	517	197.86	185.18	22.3	21.87	191.52	22.085	-3.1164	1.21648e-211	1.6327e-210
HS3ST6	595	553	2054	2061	12.52	10.95	85.3	87.2	11.735	86.25	2.8777	1.98185e-211	2.65665e-210
VCP	15612	16698	14306	13824	328.55	330.74	594.12	584.9	329.645	589.51	0.8386	2.27415e-211	3.04473e-210
VHL	6655	6849	226	185	140.05	135.66	9.39	7.83	137.855	8.61	-4.001	2.44679e-211	3.27182e-210
JMJD1C	3883	4343	5436	5369	81.72	86.02	225.75	227.16	83.87	226.455	1.433	3.45814e-211	4.61851e-210
RPS29	13667	13699	14213	13464	287.62	271.34	590.25	569.67	279.48	579.96	1.0532	7.16863e-211	9.56228e-210
MPP2	5667	5807	56	82	119.26	115.02	2.33	3.47	117.14	2.9	-5.336	7.24489e-211	9.65214e-210
SSR2	7986	8198	8690	8429	168.06	162.38	360.89	356.64	165.22	358.765	1.1187	8.95347e-211	1.19138e-209
MPHOSPH8	1615	1728	3118	3140	33.99	34.23	129.49	132.85	34.11	131.17	1.9432	1.85786e-210	2.46912e-209
SNRNP27	2062	2165	3683	3540	43.39	42.88	152.95	149.78	43.135	151.365	1.8111	8.03921e-210	1.06711e-208
ARHGAP29	2305	2403	3911	3767	48.51	47.6	162.42	159.38	48.055	160.9	1.7434	1.05584e-209	1.3998e-208
RBX1	2054	2315	3753	3682	43.23	45.85	155.86	155.79	44.54	155.825	1.8068	1.37931e-209	1.82641e-208
SCRIB	8361	8715	9039	8671	175.95	172.62	375.38	366.87	174.285	371.125	1.0905	1.929e-209	2.55116e-208
CCDC93	1609	1771	3360	3172	33.86	35.08	139.54	134.21	34.47	136.875	1.9894	2.24634e-209	2.96724e-208
CD99L2	13216	13841	1231	1206	278.12	274.15	51.12	51.03	276.135	51.075	-2.4347	2.30733e-209	3.0441e-208
LIPH	230	289	1499	1527	4.84	5.72	62.25	64.61	5.28	63.43	3.5866	2.36185e-209	3.11226e-208
GNA11	7153	7753	342	309	150.53	153.57	14.2	13.07	152.05	13.635	-3.4792	3.55461e-209	4.67829e-208
IRF8	6163	6427	204	179	129.7	127.3	8.47	7.57	128.5	8.02	-4.002	4.8832e-209	6.4191e-208
PLXNB3	3177	3486	4597	4701	66.86	69.05	190.91	198.9	67.955	194.905	1.5201	6.74034e-209	8.84965e-208
DLG2	5305	6059	60	82	111.64	120.01	2.49	3.47	115.825	2.98	-5.2805	1.7238e-208	2.2605e-207
RPS26	24584	25719	22111	20853	517.36	509.42	918.25	882.3	513.39	900.275	0.8103	2.24317e-208	2.93804e-207
ACACA	7591	8528	303	229	159.75	168.92	12.58	9.69	164.335	11.135	-3.8835	2.78906e-208	3.64863e-207
YWHAB	23942	25728	3255	3162	503.85	509.6	135.18	133.79	506.725	134.485	-1.9138	7.16361e-208	9.36011e-207
GFPT1	15790	17198	1648	1529	332.29	340.64	68.44	64.69	336.465	66.565	-2.3376	1.02647e-207	1.3396e-206
RASGRF1	227	206	1479	1393	4.78	4.08	61.42	58.94	4.43	60.18	3.7639	1.14238e-207	1.48907e-206
SLAIN1	149	177	1256	1296	3.14	3.51	52.16	54.83	3.325	53.495	4.008	1.76626e-207	2.29952e-206
GFRA3	384	305	1939	1956	8.08	6.04	80.52	82.76	7.06	81.64	3.5315	3.8388e-207	4.99183e-206
REEP5	8199	8700	9124	8632	172.54	172.32	378.91	365.22	172.43	372.065	1.1095	5.4639e-207	7.09653e-206
PRRT3	320	312	1525	1568	6.73	6.18	63.33	66.34	6.455	64.835	3.3283	6.36012e-207	8.25068e-206
MSI2	9113	10163	569	615	191.78	201.3	23.63	26.02	196.54	24.825	-2.985	1.38728e-206	1.79751e-205
CCND2	5092	5487	78	83	107.16	108.68	3.24	3.51	107.92	3.375	-4.9989	6.38691e-206	8.26569e-205
NAB1	5564	5861	49	38	117.09	116.09	2.03	1.61	116.59	1.82	-6.0014	7.68035e-206	9.92777e-205
SMAD3	13388	14029	1275	1282	281.74	277.88	52.95	54.24	279.81	53.595	-2.3843	3.4587e-205	4.46546e-204
NUDT9	2809	2672	4743	4564	59.11	52.92	196.97	193.11	56.015	195.04	1.7999	6.76291e-204	8.7211e-203
VAT1	20637	21966	2147	1873	434.3	435.09	89.16	79.25	434.695	84.205	-2.368	1.9363e-203	2.49399e-202
PER2	12105	12664	1075	1074	254.74	250.84	44.64	45.44	252.79	45.04	-2.4887	3.50426e-203	4.50821e-202
AUP1	4493	4675	5583	5537	94.55	92.6	231.86	234.27	93.575	233.065	1.3165	5.99764e-203	7.70679e-202
CLASP1	7187	7791	8651	8059	151.25	154.32	359.27	340.98	152.785	350.125	1.1964	7.68663e-203	9.86541e-202
NCALD	5589	6143	165	176	117.62	121.68	6.85	7.45	119.65	7.15	-4.0647	1.66278e-202	2.13158e-201
PPP1R14C	359	342	1584	1605	7.55	6.77	65.78	67.91	7.16	66.845	3.2228	4.20183e-202	5.38013e-201
TRIB1	987	929	2663	2513	20.77	18.4	110.59	106.33	19.585	108.46	2.4693	4.47796e-202	5.72694e-201
PNP	120	110	1259	1147	2.53	2.18	52.29	48.53	2.355	50.41	4.4199	1.07206e-201	1.36946e-200
CNNM2	5289	5425	110	111	111.3	107.45	4.57	4.7	109.375	4.635	-4.5606	1.37561e-201	1.75515e-200
KCNJ16	14129	15349	10	17	297.34	304.02	0.42	0.72	300.68	0.57	-9.0431	1.46999e-201	1.87337e-200
PA2G4	3196	3378	4820	4541	67.26	66.91	200.17	192.13	67.085	196.15	1.5479	1.81446e-201	2.30966e-200
SH2B1	1206	1280	2767	2622	25.38	25.35	114.91	110.94	25.365	112.925	2.1545	2.21597e-201	2.81745e-200
IGSF11	5582	6181	35	37	117.47	122.43	1.45	1.57	119.95	1.51	-6.3117	5.94454e-201	7.54922e-200
HNRNPA2B1	28304	29583	21817	21709	595.64	585.96	906.04	918.52	590.8	912.28	0.6268	1.01537e-200	1.28795e-199
SAP18	11017	11487	698	568	231.85	227.53	28.99	24.03	229.69	26.51	-3.1151	1.04216e-200	1.32039e-199
NAPA	8704	8954	533	549	183.17	177.35	22.14	23.23	180.26	22.685	-2.9903	1.12833e-200	1.4279e-199
TANC2	3998	4396	5369	5222	84.14	87.07	222.97	220.95	85.605	221.96	1.3745	3.47092e-200	4.38734e-199
MAPK4	8069	9566	22	19	169.81	189.48	0.91	0.8	179.645	0.855	-7.715	7.57793e-200	9.56758e-199
PARP14	10209	10963	783	821	214.84	217.15	32.52	34.74	215.995	33.63	-2.6832	9.52312e-200	1.20095e-198
PTPRE	3660	3759	5400	5020	77.02	74.46	224.26	212.4	75.74	218.33	1.5274	2.65154e-199	3.33996e-198
EYA2	1453	1491	2892	2861	30.58	29.53	120.1	121.05	30.055	120.575	2.0043	6.06949e-199	7.63645e-198
COBL	5324	5712	137	148	112.04	113.14	5.69	6.26	112.59	5.975	-4.236	7.62567e-199	9.58328e-198
IDH3B	7694	7972	8079	7907	161.92	157.9	335.51	334.55	159.91	335.03	1.067	1.44824e-198	1.81792e-197
TRIM25	8176	8550	504	491	172.06	169.35	20.93	20.77	170.705	20.85	-3.0334	2.61043e-198	3.27298e-197
ADAP1	6162	6616	253	250	129.68	131.04	10.51	10.58	130.36	10.545	-3.6279	3.56623e-198	4.46622e-197
MGP	9856	10436	21	13	207.41	206.71	0.87	0.55	207.06	0.71	-8.188	4.62436e-198	5.78472e-197
SLC22A5	8565	9598	543	481	180.25	190.11	22.55	20.35	185.18	21.45	-3.1099	6.90351e-198	8.62582e-197
CSTF2	3185	3583	5262	4838	67.03	70.97	218.53	204.7	69	211.615	1.6168	9.20477e-198	1.1488e-196
ZC3H4	2713	2756	4312	4092	57.09	54.59	179.07	173.13	55.84	176.1	1.657	1.04115e-197	1.29791e-196
DCXR	2191	1980	4814	4336	46.11	39.22	199.92	183.46	42.665	191.69	2.1677	1.26238e-197	1.57189e-196
ELOF1	242	205	1475	1428	5.09	4.06	61.26	60.42	4.575	60.84	3.7332	1.42368e-197	1.77071e-196
TRAPPC10	3128	3491	4910	4616	65.83	69.15	203.91	195.31	67.49	199.61	1.5644	1.54753e-197	1.92255e-196
SLC11A2	7619	7691	382	390	160.34	152.34	15.86	16.5	156.34	16.18	-3.2724	1.80566e-197	2.24067e-196
COL3A1	8901	9545	9089	8788	187.32	189.06	377.46	371.82	188.19	374.64	0.9933	4.77425e-197	5.91767e-196
AK4	5252	5604	66	40	110.53	111	2.74	1.69	110.765	2.215	-5.6441	8.75811e-197	1.08433e-195
SLC1A4	3589	3904	4893	4785	75.53	77.33	203.2	202.46	76.43	202.83	1.4081	1.10734e-196	1.36942e-195
TTL	9569	9950	702	670	201.38	197.08	29.15	28.35	199.23	28.75	-2.7928	2.04052e-196	2.52059e-195
SLC4A4	16815	18115	1998	1967	353.86	358.81	82.98	83.22	356.335	83.1	-2.1003	2.04502e-196	2.52327e-195
KIF1B	22646	25096	2458	2731	476.57	497.08	102.08	115.55	486.825	108.815	-2.1615	4.34811e-196	5.35888e-195
HEXB	2220	2478	3869	3692	46.72	49.08	160.68	156.21	47.9	158.445	1.7259	1.15589e-195	1.42297e-194
COTL1	10644	11152	886	861	224	220.89	36.79	36.43	222.445	36.61	-2.6031	2.23307e-195	2.74594e-194
GNB4	8949	10208	555	611	188.33	202.19	23.05	25.85	195.26	24.45	-2.9975	5.59825e-195	6.87623e-194
SLC35B4	5917	6379	207	167	124.52	126.35	8.6	7.07	125.435	7.835	-4.0009	6.95128e-195	8.52847e-194
ASB14	47	55	1038	1056	0.99	1.09	43.11	44.68	1.04	43.895	5.3994	8.86333e-195	1.08621e-193
NELFA	8327	8409	402	460	175.24	166.56	16.69	19.46	170.9	18.075	-3.2411	9.65496e-195	1.18189e-193
RAB43	2885	3386	4985	4714	60.71	67.07	207.02	199.45	63.89	203.235	1.6695	1.02335e-194	1.2513e-193
SYNGAP1	8070	8005	410	362	169.83	158.56	17.03	15.32	164.195	16.175	-3.3436	3.37752e-194	4.12521e-193
STMN1	7692	8572	471	453	161.87	169.79	19.56	19.17	165.83	19.365	-3.0982	4.84782e-194	5.91434e-193
PIGQ	1140	1073	2635	2785	23.99	21.25	109.43	117.83	22.62	113.63	2.3287	1.21891e-193	1.4854e-192
LGI2	9406	10225	679	723	197.94	202.53	28.2	30.59	200.235	29.395	-2.7681	2.26821e-193	2.76102e-192
NFE2L1	30981	31297	4220	4047	651.98	619.91	175.25	171.23	635.945	173.24	-1.8761	2.43047e-193	2.95521e-192
GNB1L	5271	5508	128	145	110.93	109.1	5.32	6.14	110.015	5.73	-4.263	6.16884e-193	7.49232e-192
SH3TC2	3032	3155	4232	4396	63.81	62.49	175.75	186	63.15	180.875	1.5181	1.2799e-192	1.55276e-191
KCNG2	5075	5531	137	127	106.8	109.55	5.69	5.37	108.175	5.53	-4.2899	1.38379e-192	1.67692e-191
STARD5	7785	8054	344	263	163.83	159.53	14.29	11.13	161.68	12.71	-3.6691	1.42075e-192	1.71979e-191
USP7	7464	8051	7660	7658	157.08	159.47	318.11	324.01	158.275	321.06	1.0204	2.99485e-192	3.62117e-191
EIF4B	24728	25091	23956	22055	520.39	496.98	994.87	933.16	508.685	964.015	0.9223	5.29892e-192	6.39997e-191
SCYL1	2243	2086	4096	3959	47.2	41.32	170.1	167.51	44.26	168.805	1.9313	1.28279e-191	1.54762e-190
MAPRE3	5285	5396	6929	6393	111.22	106.88	287.76	270.49	109.05	279.125	1.3559	2.28043e-191	2.74815e-190
LAMTOR1	3550	3161	6065	5872	74.71	62.61	251.87	248.45	68.66	250.16	1.8653	1.2331e-190	1.48437e-189
ITGA5	1242	1076	3498	3148	26.14	21.31	145.27	133.19	23.725	139.23	2.553	2.05761e-190	2.47415e-189
RELA	1360	1291	3181	2908	28.62	25.57	132.1	123.04	27.095	127.57	2.2352	2.47243e-190	2.96965e-189
SREK1IP1	102	87	1105	1081	2.15	1.72	45.89	45.74	1.935	45.815	4.5654	3.84409e-190	4.61206e-189
METAP2	4745	5223	5723	5955	99.86	103.45	237.67	251.96	101.655	244.815	1.268	4.26363e-190	5.10976e-189
COL7A1	5006	5167	44	63	105.35	102.34	1.83	2.67	103.845	2.25	-5.5284	7.94426e-190	9.51034e-189
SULT6B1	80	80	1022	1037	1.68	1.58	42.44	43.88	1.63	43.16	4.7268	1.26801e-189	1.5163e-188
PROCA1	63	70	1186	1009	1.33	1.39	49.25	42.69	1.36	45.97	5.079	1.76468e-189	2.10791e-188
TM9SF4	5872	6154	6623	6418	123.57	121.89	275.05	271.55	122.73	273.3	1.155	1.86226e-189	2.22202e-188
HMGN1	3768	4042	4802	4951	79.3	80.06	199.42	209.48	79.68	204.45	1.3595	2.68804e-189	3.20381e-188
CRIM1	6934	7691	378	384	145.92	152.34	15.7	16.25	149.13	15.975	-3.2227	3.05995e-189	3.64308e-188
LY6E	41435	38727	13	6	871.98	767.07	0.54	0.25	819.525	0.395	-11.0187	4.22669e-189	5.02666e-188
PEMT	6377	6614	261	216	134.2	131	10.84	9.14	132.6	9.99	-3.7305	5.85321e-189	6.95341e-188
TRIM45	1069	1157	2504	2389	22.5	22.92	103.99	101.08	22.71	102.535	2.1747	8.2835e-189	9.82976e-188
ZFAT	623	827	2578	2375	13.11	16.38	107.06	100.49	14.745	103.775	2.8152	1.46983e-188	1.74229e-187
PLXDC2	5197	5631	135	101	109.37	111.53	5.61	4.27	110.45	4.94	-4.4827	2.18765e-188	2.59035e-187
TIMP2	49582	51143	8266	8429	1043.43	1013	343.28	356.64	1028.21	349.96	-1.5549	3.35712e-188	3.97076e-187
ZFYVE16	4625	4956	68	71	97.33	98.16	2.82	3	97.745	2.91	-5.0699	1.39176e-187	1.64436e-186
ASPH	4707	5416	98	87	99.06	107.28	4.07	3.68	103.17	3.875	-4.7347	1.45169e-187	1.71332e-186
LASP1	19215	20052	2443	2397	404.37	397.17	101.46	101.42	400.77	101.44	-1.9821	1.50702e-187	1.77668e-186
SCNN1A	4613	4896	5475	5425	97.08	96.98	227.37	229.53	97.03	228.45	1.2354	2.03e-187	2.39065e-186
TMED10	26706	28631	3751	3479	562.02	567.1	155.78	147.2	564.56	151.49	-1.8979	2.04995e-187	2.41153e-186
PAM	4744	5295	6003	5796	99.84	104.88	249.3	245.23	102.36	247.265	1.2724	2.17819e-187	2.55961e-186
SLC27A4	6582	7172	336	344	138.52	142.06	13.95	14.55	140.29	14.25	-3.2994	3.56819e-187	4.18848e-186
KLHDC3	1452	1474	2996	2801	30.56	29.2	124.42	118.51	29.88	121.465	2.0233	3.64052e-187	4.26877e-186
SIX1	11429	11986	12202	11214	240.52	237.41	506.74	474.47	238.965	490.605	1.0378	5.92013e-187	6.93428e-186
CNP	16847	17476	1976	1927	354.54	346.15	82.06	81.53	350.345	81.795	-2.0987	6.33905e-187	7.41697e-186
RABEP1	10372	11267	881	914	218.27	223.17	36.59	38.67	220.72	37.63	-2.5523	6.82635e-187	7.97853e-186
RPL29	6969	7423	7460	7203	146.66	147.03	309.81	304.76	146.845	307.285	1.0653	9.22223e-187	1.07672e-185
TSPAN7	2706	2997	4029	4005	56.95	59.36	167.32	169.45	58.155	168.385	1.5338	1.16282e-186	1.35617e-185
RELL2	922	860	2332	2360	19.4	17.03	96.85	99.85	18.215	98.35	2.4328	1.18336e-186	1.37864e-185
PHKG1	5051	5238	73	103	106.3	103.75	3.03	4.36	105.025	3.695	-4.829	1.67813e-186	1.95296e-185
USP33	5185	5513	138	159	109.12	109.2	5.73	6.73	109.16	6.23	-4.1311	5.50126e-186	6.39537e-185
NID1	12944	14073	1336	1261	272.4	278.75	55.48	53.35	275.575	54.415	-2.3404	6.50376e-186	7.55271e-185
RBBP4	9795	10950	497	623	206.13	216.89	20.64	26.36	211.51	23.5	-3.17	7.71687e-186	8.9519e-185
PGRMC1	7341	7682	8062	8864	154.49	152.16	334.81	375.04	153.325	354.925	1.2109	9.03394e-186	1.04686e-184
SSPN	2532	2829	4184	3929	53.28	56.03	173.76	166.24	54.655	170	1.6371	1.44704e-185	1.67505e-184
PSENEN	800	749	2145	2202	16.84	14.84	89.08	93.17	15.84	91.125	2.5243	1.52065e-185	1.75839e-184
BACE1	9944	10727	591	707	209.27	212.47	24.54	29.91	210.87	27.225	-2.9533	1.73148e-185	2.00004e-184
SERPINH1	36464	38482	6016	6086	767.37	762.22	249.84	257.5	764.795	253.67	-1.5921	2.56412e-185	2.95868e-184
NUP188	6238	6339	7375	6932	131.28	125.56	306.28	293.3	128.42	299.79	1.2231	3.51936e-185	4.0566e-184
HNRNPH1	32590	33545	4982	4954	685.84	664.43	206.9	209.61	675.135	208.255	-1.6968	1.0574e-184	1.21752e-183
TARDBP	7234	7606	7356	7299	152.24	150.65	305.49	308.82	151.445	307.155	1.0202	1.38455e-184	1.59253e-183
FEZ1	10210	10706	865	821	214.86	212.06	35.92	34.74	213.46	35.33	-2.595	4.06916e-184	4.67545e-183
ATP13A5	8950	9498	13	19	188.35	188.13	0.54	0.8	188.24	0.67	-8.1342	7.12148e-184	8.17389e-183
MDN1	6610	6876	23	21	139.1	136.19	0.96	0.89	137.645	0.925	-7.2173	7.62713e-184	8.74502e-183
PRMT1	762	895	2248	2129	16.04	17.73	93.36	90.08	16.885	91.72	2.4415	1.11652e-183	1.27882e-182
SERPINI1	2876	3325	4372	4434	60.52	65.86	181.57	187.6	63.19	184.585	1.5465	1.11189e-182	1.27218e-181
SLC20A1	1273	1391	2567	2626	26.79	27.55	106.61	111.11	27.17	108.86	2.0024	1.23487e-182	1.41139e-181
ECEL1	32	29	1106	1034	0.67	0.57	45.93	43.75	0.62	44.84	6.1764	2.15159e-182	2.45657e-181
NKTR	9046	10402	667	687	190.37	206.03	27.7	29.07	198.2	28.385	-2.8038	2.27058e-182	2.58971e-181
MDM2	7155	7881	431	395	150.57	156.1	17.9	16.71	153.335	17.305	-3.1474	2.46394e-182	2.80728e-181
TBC1D9B	17699	19047	2209	2277	372.47	377.27	91.74	96.34	374.87	94.04	-1.995	5.87395e-182	6.68547e-181
CALB1	24881	29148	233	296	523.61	577.34	9.68	12.52	550.475	11.1	-5.632	6.67217e-182	7.58601e-181
SLC6A9	5101	5261	32	37	107.35	104.21	1.33	1.57	105.78	1.45	-6.1889	8.41145e-182	9.55351e-181
HLF	4736	5170	120	124	99.67	102.4	4.98	5.25	101.035	5.115	-4.304	9.07852e-182	1.03004e-180
SUGP1	2562	2511	4105	3898	53.92	49.74	170.48	164.93	51.83	167.705	1.6941	1.57441e-181	1.78444e-180
XPR1	2849	2997	4098	3960	59.96	59.36	170.19	167.55	59.66	168.87	1.5011	1.70204e-181	1.92709e-180
ARFGEF3	4480	4847	71	61	94.28	96.01	2.95	2.58	95.145	2.765	-5.1048	2.51545e-181	2.84507e-180
NELFB	2701	2819	3841	3858	56.84	55.84	159.51	163.23	56.34	161.37	1.5181	2.56627e-181	2.89954e-180
MLIP	6130	6524	296	284	129	129.22	12.29	12.02	129.11	12.155	-3.409	3.57816e-181	4.03864e-180
SH3GL1	10352	11203	824	903	217.85	221.9	34.22	38.21	219.875	36.215	-2.602	7.49444e-181	8.45012e-180
TRAPPC3	10774	11785	968	1010	226.73	233.43	40.2	42.73	230.08	41.465	-2.4722	9.27249e-181	1.04441e-179
PWP2	1405	1510	2991	2737	29.57	29.91	124.21	115.8	29.74	120.005	2.0126	1.84866e-180	2.08007e-179
ZMAT4	5496	5457	34	27	115.66	108.09	1.41	1.14	111.875	1.275	-6.4552	2.45892e-180	2.76386e-179
SERGEF	538	439	2033	2020	11.32	8.7	84.43	85.47	10.01	84.95	3.0852	3.0678e-180	3.44469e-179
SRPX	9380	9793	750	718	197.4	193.97	31.15	30.38	195.685	30.765	-2.6692	3.13784e-180	3.51969e-179
KLF5	679	693	1862	1954	14.29	13.73	77.33	82.67	14.01	80	2.5135	3.19898e-180	3.58458e-179
MTHFD1	2228	2324	3431	3433	46.89	46.03	142.49	145.25	46.46	143.87	1.6307	3.30822e-180	3.70316e-179
CRTAC1	1580	1620	2843	3020	33.25	32.09	118.07	127.78	32.67	122.925	1.9117	4.26267e-180	4.76664e-179
ST14	12540	12668	1115	1170	263.9	250.92	46.3	49.5	257.41	47.9	-2.426	8.39851e-180	9.38179e-179
OTX1	313	307	1502	1372	6.59	6.08	62.38	58.05	6.335	60.215	3.2487	9.9808e-180	1.11379e-178
APMAP	17249	18807	1881	2059	363	372.51	78.12	87.12	367.755	82.62	-2.1542	1.21033e-179	1.34926e-178
GPNMB	19	28	1121	1207	0.4	0.55	46.55	51.07	0.475	48.81	6.6831	1.74984e-179	1.94869e-178
CTHRC1	1081	1052	2400	2605	22.75	20.84	99.67	110.22	21.795	104.945	2.2676	1.80924e-179	2.01278e-178
RPS15A	19435	21268	18318	17029	409	421.26	760.73	720.51	415.13	740.62	0.8352	2.50966e-179	2.78914e-178
TMX4	2267	2719	4000	4147	47.71	53.86	166.12	175.46	50.785	170.79	1.7497	4.34915e-179	4.82853e-178
LRP2	60434	65674	41705	41449	1271.81	1300.82	1731.97	1753.73	1286.32	1742.85	0.4382	6.63555e-179	7.35943e-178
KDELR3	1746	1888	2981	3058	36.74	37.4	123.8	129.39	37.07	126.595	1.7719	1.57637e-178	1.74655e-177
CNTRL	1679	1838	3042	2942	35.33	36.41	126.33	124.48	35.87	125.405	1.8057	2.112e-178	2.33762e-177
SPHK1	4650	4841	58	41	97.86	95.89	2.41	1.73	96.875	2.07	-5.5484	2.445e-178	2.70345e-177
TRPM7	4071	4626	5282	5543	85.67	91.63	219.36	234.53	88.65	226.945	1.3562	3.0385e-178	3.35626e-177
TPRA1	4541	4839	44	45	95.56	95.85	1.83	1.9	95.705	1.865	-5.6813	3.18276e-178	3.51203e-177
OCEL1	5	11	4242	4032	0.11	0.22	176.17	170.6	0.165	173.385	10.0373	5.43178e-178	5.98764e-177
TNS3	11705	12685	1181	1130	246.33	251.25	49.05	47.81	248.79	48.43	-2.361	5.97141e-178	6.57582e-177
CPXM1	16446	16196	1647	1682	346.1	320.8	68.4	71.17	333.45	69.785	-2.2565	8.51154e-178	9.36355e-177
SGIP1	1961	2206	3300	3495	41.27	43.69	137.05	147.88	42.48	142.465	1.7458	1.31111e-177	1.44089e-176
SPATA20	3324	3597	4351	4356	69.95	71.25	180.69	184.3	70.6	182.495	1.3701	2.08892e-177	2.29337e-176
FKBP11	1805	1952	3435	3132	37.99	38.66	142.65	132.52	38.325	137.585	1.844	1.4179e-176	1.55511e-175
ARHGEF11	4932	5210	5535	5538	103.79	103.2	229.86	234.32	103.495	232.09	1.1651	1.60075e-176	1.75388e-175
SMAD4	1200	1182	2460	2561	25.25	23.41	102.16	108.36	24.33	105.26	2.1131	1.62118e-176	1.77447e-175
TNFSF10	4294	4839	57	60	90.37	95.85	2.37	2.54	93.11	2.455	-5.2451	2.76344e-176	3.02169e-175
YAP1	9905	10498	868	823	208.45	207.94	36.05	34.82	208.195	35.435	-2.5547	4.64478e-176	5.07375e-175
PPTC7	5515	6050	169	116	116.06	119.83	7.02	4.91	117.945	5.965	-4.3054	5.55609e-176	6.06312e-175
SPTSSB	5032	5147	116	143	105.9	101.95	4.82	6.05	103.925	5.435	-4.2571	1.04873e-175	1.14329e-174
CNPY2	8168	8180	473	517	171.89	162.02	19.64	21.87	166.955	20.755	-3.0079	2.19523e-175	2.39075e-174
SCG5	1341	1400	2564	2570	28.22	27.73	106.48	108.74	27.975	107.61	1.9436	2.6685e-175	2.90326e-174
CD3E	4548	4591	50	52	95.71	90.93	2.08	2.2	93.32	2.14	-5.4465	3.10848e-175	3.37857e-174
PLSCR1	8144	9666	532	476	171.39	191.46	22.09	20.14	181.425	21.115	-3.103	4.32432e-175	4.69535e-174
TRIP4	1233	1397	2542	2587	25.95	27.67	105.57	109.46	26.81	107.515	2.0037	4.81732e-175	5.22542e-174
SPINT1	24018	25253	3462	3288	505.45	500.19	143.77	139.12	502.82	141.445	-1.8298	5.28564e-175	5.72769e-174
FAH	19	14	1359	1397	0.4	0.28	56.44	59.11	0.34	57.775	7.4088	6.06521e-175	6.56591e-174
NIPA1	5124	5938	180	153	107.83	117.62	7.48	6.47	112.725	6.975	-4.0145	8.20888e-175	8.87769e-174
TCF12	18063	19481	2407	2410	380.13	385.86	99.96	101.97	382.995	100.965	-1.9235	1.37242e-174	1.48276e-173
ANGPTL7	59	78	957	961	1.24	1.54	39.74	40.66	1.39	40.2	4.854	1.71593e-174	1.85204e-173
SLC14A2	260	300	1288	1414	5.47	5.94	53.49	59.83	5.705	56.66	3.312	2.28189e-174	2.46046e-173
TMED5	7760	8456	474	532	163.31	167.49	19.68	22.51	165.4	21.095	-2.971	2.98509e-174	3.21549e-173
PCK2	8304	8446	401	489	174.75	167.29	16.65	20.69	171.02	18.67	-3.1954	3.35499e-174	3.61036e-173
CITED4	9450	9261	559	460	198.87	183.43	23.21	19.46	191.15	21.335	-3.1634	6.62513e-174	7.12235e-173
HSBP1	4707	5146	5728	5470	99.06	101.93	237.88	231.44	100.495	234.66	1.2234	6.83024e-174	7.33559e-173
OSBPL8	7694	8385	547	518	161.92	166.08	22.72	21.92	164	22.32	-2.8773	1.2131e-173	1.30157e-172
ECM2	9414	11023	715	753	198.11	218.33	29.69	31.86	208.22	30.775	-2.7583	1.24009e-173	1.32921e-172
CACHD1	8191	8556	591	599	172.38	169.47	24.54	25.34	170.925	24.94	-2.7768	2.26215e-173	2.42233e-172
BCLAF1	5954	5915	244	223	125.3	117.16	10.13	9.44	121.23	9.785	-3.631	2.29599e-173	2.45614e-172
SCMH1	2894	3008	3940	3920	60.9	59.58	163.62	165.86	60.24	164.74	1.4514	3.11748e-173	3.33166e-172
LY75	7676	8083	466	516	161.54	160.1	19.35	21.83	160.82	20.59	-2.9654	4.16115e-173	4.44265e-172
SLK	12738	13463	1360	1382	268.07	266.66	56.48	58.47	267.365	57.475	-2.2178	4.80378e-173	5.12372e-172
TOLLIP	9135	10274	747	687	192.24	203.5	31.02	29.07	197.87	30.045	-2.7194	9.62213e-173	1.02529e-171
TWF2	14828	15487	1700	1603	312.05	306.75	70.6	67.82	309.4	69.21	-2.1604	1.08421e-172	1.15416e-171
PPT2	867	950	2114	2360	18.25	18.82	87.79	99.85	18.535	93.82	2.3396	2.33695e-172	2.48527e-171
EVI5L	4783	4884	132	128	100.66	96.74	5.48	5.42	98.7	5.45	-4.1787	2.40568e-172	2.55586e-171
SLC7A3	2070	2159	3224	3215	43.56	42.76	133.89	136.03	43.16	134.96	1.6448	2.79959e-172	2.97145e-171
PTPRN	1317	1470	2618	2574	27.72	29.12	108.72	108.91	28.42	108.815	1.9369	3.83825e-172	4.0699e-171
DDB1	7959	8397	7793	7606	167.49	166.32	323.64	321.81	166.905	322.725	0.9513	4.58715e-172	4.85924e-171
SRF	2856	2942	3908	3886	60.1	58.27	162.3	164.42	59.185	163.36	1.4648	4.88838e-172	5.17329e-171
LMO2	4798	5009	112	137	100.97	99.21	4.65	5.8	100.09	5.225	-4.2597	4.91658e-172	5.19808e-171
ZC3H7B	14966	15682	1776	1773	314.95	310.62	73.76	75.02	312.785	74.39	-2.072	1.05014e-171	1.10919e-170
MGA	6466	7143	359	313	136.07	141.48	14.91	13.24	138.775	14.075	-3.3015	1.17687e-171	1.24183e-170
RND1	181	191	1119	1294	3.81	3.78	46.47	54.75	3.795	50.61	3.7373	1.21825e-171	1.28425e-170
PCDH9	520	511	1889	1667	10.94	10.12	78.45	70.53	10.53	74.49	2.8225	1.2412e-171	1.30717e-170
MED14	2622	2486	4153	3992	55.18	49.24	172.47	168.9	52.21	170.685	1.7089	1.82171e-171	1.91667e-170
FKBP15	4836	4961	5593	5435	101.77	98.26	232.27	229.96	100.015	231.115	1.2084	1.92377e-171	2.02211e-170
RNF166	4606	5229	132	110	96.93	103.57	5.48	4.65	100.25	5.065	-4.3069	4.04095e-171	4.24338e-170
ZDHHC13	826	995	2222	2202	17.38	19.71	92.28	93.17	18.545	92.725	2.3219	5.34887e-171	5.6114e-170
TECTA	49728	51909	7992	8522	1046.5	1028.17	331.9	360.57	1037.34	346.235	-1.5831	6.47471e-171	6.78595e-170
XRRA1	74	44	1092	1041	1.56	0.87	45.35	44.05	1.215	44.7	5.2012	1.46902e-170	1.53815e-169
NDST2	3852	3958	4669	4690	81.06	78.4	193.9	198.44	79.73	196.17	1.2989	1.63029e-170	1.70537e-169
HAP1	13	22	1234	1289	0.27	0.44	51.25	54.54	0.355	52.895	7.2192	3.47648e-170	3.63307e-169
EPAS1	12739	14406	922	1109	268.09	285.34	38.29	46.92	276.715	42.605	-2.6993	4.13022e-170	4.3121e-169
SLC25A36	4940	5521	123	160	103.96	109.36	5.11	6.77	106.66	5.94	-4.1664	4.87159e-170	5.08125e-169
PROSER2	8529	9357	651	691	179.49	185.34	27.04	29.24	182.415	28.14	-2.6965	7.29457e-170	7.60119e-169
TMED8	4445	4921	41	69	93.54	97.47	1.7	2.92	95.505	2.31	-5.3696	9.06494e-170	9.43692e-169
PPIA	43999	44055	33021	32716	925.94	872.61	1371.33	1384.23	899.275	1377.78	0.6155	1.1213e-169	1.1662e-168
TPM3	19620	20941	16468	15675	412.89	414.78	683.9	663.22	413.835	673.56	0.7028	1.69126e-169	1.75729e-168
SEC61G	796	928	2060	2216	16.75	18.38	85.55	93.76	17.565	89.655	2.3517	2.0313e-169	2.10859e-168
EZR	5703	5830	6133	6044	120.02	115.48	254.7	255.72	117.75	255.21	1.116	1.36866e-168	1.41938e-167
SMOC1	4235	4340	4929	5038	89.12	85.96	204.7	213.16	87.54	208.93	1.255	1.44447e-168	1.49657e-167
FAT2	4682	4584	97	103	98.53	90.8	4.03	4.36	94.665	4.195	-4.4961	1.61926e-168	1.67607e-167
SAMM50	3636	3976	4564	4517	76.52	78.75	189.54	191.12	77.635	190.33	1.2937	2.33868e-168	2.41842e-167
UBQLN4	6529	6748	8017	7231	137.4	133.66	332.94	305.95	135.53	319.445	1.237	2.72143e-168	2.81154e-167
FKBP1A	20889	22020	16553	16041	439.6	436.15	687.43	678.7	437.875	683.065	0.6415	3.7386e-168	3.85871e-167
KIF17	56	64	917	883	1.18	1.27	38.08	37.36	1.225	37.72	4.9445	7.08324e-168	7.30387e-167
ZFYVE21	1833	1954	3047	2951	38.57	38.7	126.54	124.86	38.635	125.7	1.702	2.46377e-167	2.53811e-166
NECAB3	4730	4979	28	31	99.54	98.62	1.16	1.31	99.08	1.235	-6.326	4.37439e-167	4.50209e-166
P3H2	661	734	1881	1791	13.91	14.54	78.12	75.78	14.225	76.95	2.4355	5.22869e-167	5.37624e-166
PIM1	563	546	1713	1663	11.85	10.81	71.14	70.36	11.33	70.75	2.6426	5.24718e-167	5.39015e-166
RCAN2	10615	11354	1053	1033	223.39	224.89	43.73	43.71	224.14	43.72	-2.358	6.7214e-167	6.89801e-166
MADD	12620	13734	10821	10770	265.58	272.03	449.39	455.68	268.805	452.535	0.7515	1.0985e-166	1.1263e-165
KLHL25	6888	6994	402	403	144.95	138.53	16.69	17.05	141.74	16.87	-3.0707	1.19077e-166	1.21975e-165
DNAJC25	564	707	1877	1922	11.87	14	77.95	81.32	12.935	79.635	2.6221	2.09463e-166	2.14359e-165
SLC2A1	15225	15796	12644	12367	320.4	312.87	525.09	523.25	316.635	524.17	0.7272	2.43503e-166	2.4896e-165
PBX1	20108	21079	2764	2837	423.16	417.52	114.79	120.03	420.34	117.41	-1.84	2.51694e-166	2.57093e-165
SLC6A12	63	59	887	902	1.33	1.17	36.84	38.16	1.25	37.5	4.9069	2.62612e-166	2.67992e-165
ESPN	14729	15545	1796	1755	309.97	307.9	74.59	74.25	308.935	74.42	-2.0535	3.22472e-166	3.2877e-165
CMTM4	4831	5582	94	136	101.67	110.56	3.9	5.75	106.115	4.825	-4.459	3.32808e-166	3.38989e-165
YWHAQ	35060	40151	5589	5597	737.82	795.28	232.11	236.81	766.55	234.46	-1.709	4.02787e-166	4.09884e-165
MERTK	3888	4157	4666	4618	81.82	82.34	193.77	195.39	82.08	194.58	1.2453	5.65635e-166	5.75062e-165
YWHAG	11789	12569	1179	1250	248.09	248.96	48.96	52.89	248.525	50.925	-2.2869	6.34138e-166	6.44103e-165
ABLIM3	4167	4366	5076	5572	87.69	86.48	210.8	235.75	87.085	223.275	1.3583	9.99881e-166	1.01465e-164
EPHA4	2072	2236	3227	3162	43.6	44.29	134.01	133.79	43.945	133.9	1.6074	1.03666e-165	1.05099e-164
GALNT4	1889	2026	3048	2994	39.75	40.13	126.58	126.68	39.94	126.63	1.6647	1.04439e-165	1.05783e-164
KCNQ2	8858	9861	702	615	186.41	195.32	29.15	26.02	190.865	27.585	-2.7906	1.34404e-165	1.36007e-164
RAPGEF6	7954	8383	606	588	167.39	166.04	25.17	24.88	166.715	25.025	-2.7359	2.3118e-165	2.3372e-164
CYB5R4	1005	1187	2317	2377	21.15	23.51	96.22	100.57	22.33	98.395	2.1396	2.47352e-165	2.49837e-164
ARHGEF39	50	63	979	868	1.05	1.25	40.66	36.73	1.15	38.695	5.0724	3.80291e-165	3.83754e-164
GRPEL2	5296	5586	209	169	111.45	110.64	8.68	7.15	111.045	7.915	-3.8104	4.66212e-165	4.70021e-164
ME3	2468	2417	3659	3614	51.94	47.87	151.96	152.91	49.905	152.435	1.6109	6.03867e-165	6.08237e-164
LARP1B	2056	2452	3816	3586	43.27	48.57	158.48	151.73	45.92	155.105	1.7561	1.14428e-164	1.15149e-163
PDIA5	1167	1260	2403	2307	24.56	24.96	99.79	97.61	24.76	98.7	1.995	1.8354e-164	1.84526e-163
TOMM22	6559	6663	370	349	138.03	131.98	15.37	14.77	135.005	15.07	-3.1633	1.9671e-164	1.97583e-163
ABHD14A	1205	1144	2443	2498	25.36	22.66	101.46	105.69	24.01	103.575	2.109	3.17489e-164	3.18604e-163
PPOX	1088	1086	2356	2234	22.9	21.51	97.84	94.52	22.205	96.18	2.1149	3.82919e-164	3.83909e-163
ESYT1	9090	9179	717	715	191.29	181.81	29.78	30.25	186.55	30.015	-2.6358	4.32569e-164	4.33287e-163
GPM6A	30	21	955	1055	0.63	0.42	39.66	44.64	0.525	42.15	6.3271	1.05857e-163	1.05935e-162
ZFYVE9	4679	4909	144	115	98.47	97.23	5.98	4.87	97.85	5.425	-4.1729	2.56735e-163	2.56688e-162
MORN4	4426	4406	97	85	93.14	87.27	4.03	3.6	90.205	3.815	-4.5635	3.00823e-163	3.00491e-162
MRPL9	1493	1602	2819	2635	31.42	31.73	117.07	111.49	31.575	114.28	1.8557	3.41013e-163	3.40324e-162
OSBP2	6469	7009	393	350	136.14	138.83	16.32	14.81	137.485	15.565	-3.1429	5.71015e-163	5.69337e-162
DNAJB6	6583	7284	400	425	138.54	144.28	16.61	17.98	141.41	17.295	-3.0315	6.16829e-163	6.14452e-162
PRDX6	12930	13385	840	1047	272.11	265.12	34.88	44.3	268.615	39.59	-2.7623	9.95426e-163	9.90682e-162
DNAJC5B	7784	8371	599	602	163.81	165.81	24.88	25.47	164.81	25.175	-2.7107	1.62649e-162	1.61726e-161
MAN2A2	9336	9515	8877	8577	196.47	188.47	368.65	362.9	192.47	365.775	0.9263	2.1485e-162	2.13435e-161
SCRG1	5755	6287	258	200	121.11	124.53	10.71	8.46	122.82	9.585	-3.6796	2.64929e-162	2.62943e-161
TNFRSF11B	5639	6282	244	283	118.67	124.43	10.13	11.97	121.55	11.05	-3.4594	3.28925e-162	3.26161e-161
ADGRL3	9493	10380	860	892	199.78	205.6	35.72	37.74	202.69	36.73	-2.4642	3.42755e-162	3.39565e-161
LMO7	6956	7182	6848	6791	146.39	142.26	284.39	287.33	144.325	285.86	0.986	4.74292e-162	4.6945e-161
PSMB4	8185	7825	9342	8764	172.25	154.99	387.96	370.81	163.62	379.385	1.2133	5.26976e-162	5.21121e-161
FDX1	1431	1529	2603	2537	30.11	30.29	108.1	107.34	30.2	107.72	1.8347	5.60126e-162	5.53398e-161
SLC38A4	4579	5366	26	28	96.36	106.29	1.08	1.18	101.325	1.13	-6.4865	8.68107e-162	8.569e-161
PTPN11	5272	5676	244	242	110.95	112.43	10.13	10.24	111.69	10.185	-3.455	1.36232e-161	1.34351e-160
ESRRB	17829	18962	2341	2449	375.2	375.58	97.22	103.62	375.39	100.42	-1.9023	5.45663e-161	5.37642e-160
CREB3L1	4156	4279	39	48	87.46	84.76	1.62	2.03	86.11	1.825	-5.5602	5.84789e-161	5.7567e-160
KIF5B	9605	9918	669	775	202.13	196.45	27.78	32.79	199.29	30.285	-2.7182	7.04882e-161	6.93262e-160
PDGFRB	9849	10223	655	779	207.27	202.49	27.2	32.96	204.88	30.08	-2.7679	1.26282e-160	1.24088e-159
CPZ	5430	5478	24	19	114.27	108.5	1	0.8	111.385	0.9	-6.9514	1.41325e-160	1.38677e-159
ANGEL1	7688	7975	491	548	161.79	157.96	20.39	23.19	159.875	21.79	-2.8752	1.41385e-160	1.38677e-159
SUZ12	614	684	1778	1694	12.92	13.55	73.84	71.67	13.235	72.755	2.4587	1.46827e-160	1.43885e-159
DNAH12	182	186	1060	1071	3.83	3.68	44.02	45.31	3.755	44.665	3.5723	1.53858e-160	1.5064e-159
SRSF2	10107	10988	9909	9313	212.7	217.64	411.51	394.04	215.17	402.775	0.9045	1.55612e-160	1.52219e-159
EFEMP1	13598	15237	1461	1574	286.16	301.8	60.67	66.6	293.98	63.635	-2.2078	1.96219e-160	1.91768e-159
FGF16	419	440	1409	1473	8.82	8.72	58.51	62.32	8.77	60.415	2.7843	1.98683e-160	1.94002e-159
FGFR3	4028	4279	74	83	84.77	84.76	3.07	3.51	84.765	3.29	-4.6873	3.43594e-160	3.35197e-159
DESI1	8966	9980	749	800	188.69	197.68	31.11	33.85	193.185	32.48	-2.5724	4.3989e-160	4.28755e-159
MAEA	7771	8619	7570	7806	163.54	170.72	314.38	330.28	167.13	322.33	0.9476	4.70136e-160	4.57824e-159
SNAPC4	1640	1602	2951	2797	34.51	31.73	122.55	118.34	33.12	120.445	1.8626	6.36746e-160	6.19515e-159
SEMA3F	2148	2225	3152	3284	45.2	44.07	130.9	138.95	44.635	134.925	1.5959	6.76695e-160	6.57794e-159
SETD7	10291	10413	900	935	216.57	206.25	37.38	39.56	211.41	38.47	-2.4582	1.23796e-159	1.20231e-158
TMEM248	23212	24882	3496	3289	488.49	492.84	145.19	139.16	490.665	142.175	-1.7871	2.71888e-159	2.63822e-158
MTMR2	6368	7167	265	337	134.01	141.96	11.01	14.26	137.985	12.635	-3.449	2.92252e-159	2.83328e-158
CMBL	18	22	1068	1003	0.38	0.44	44.35	42.44	0.41	43.395	6.7258	5.48013e-159	5.30805e-158
SGSM3	2918	3085	3798	3786	61.41	61.11	157.73	160.19	61.26	158.96	1.3756	5.76041e-159	5.57456e-158
NFIB	3464	3949	4518	4749	72.9	78.22	187.63	200.93	75.56	194.28	1.3624	7.25847e-159	7.01803e-158
OLFM1	12094	13117	1379	1347	254.51	259.81	57.27	56.99	257.16	57.13	-2.1703	9.40247e-159	9.08292e-158
RFX5	1564	1438	2892	3081	32.91	28.48	120.1	130.36	30.695	125.23	2.0285	1.4934e-158	1.44136e-157
USP20	9920	10495	9759	9102	208.76	207.88	405.28	385.11	208.32	395.195	0.9238	1.58468e-158	1.52811e-157
MBOAT2	4130	4822	76	99	86.91	95.51	3.16	4.19	91.21	3.675	-4.6334	1.81463e-158	1.74829e-157
WDPCP	1035	1058	2168	2412	21.78	20.96	90.04	102.05	21.37	96.045	2.1681	1.92402e-158	1.85204e-157
SCNN1G	1130	1174	2205	2307	23.78	23.25	91.57	97.61	23.515	94.59	2.0081	2.07799e-158	1.99847e-157
RNF26	4282	4599	122	100	90.11	91.09	5.07	4.23	90.6	4.65	-4.2842	3.43472e-158	3.30037e-157
ZBTB38	4151	4649	116	102	87.36	92.08	4.82	4.32	89.72	4.57	-4.2952	3.44325e-158	3.30564e-157
LDLRAD4	4413	4854	150	143	92.87	96.14	6.23	6.05	94.505	6.14	-3.9441	4.22705e-158	4.05454e-157
PLD1	7114	8138	476	508	149.71	161.19	19.77	21.49	155.45	20.63	-2.9136	5.00796e-158	4.79933e-157
IHH	37	23	895	1029	0.78	0.46	37.17	43.54	0.62	40.355	6.0243	5.5711e-158	5.33431e-157
HTRA3	4353	4863	131	103	91.61	96.32	5.44	4.36	93.965	4.9	-4.2613	8.26825e-158	7.90984e-157
TAF8	1029	1255	2408	2428	21.65	24.86	100	102.73	23.255	101.365	2.1239	1.21727e-157	1.16348e-156
SF3A1	7562	7883	7152	7097	159.14	156.14	297.02	300.28	157.64	298.65	0.9218	1.34463e-157	1.28408e-156
SEPTIN6	7528	8015	571	580	158.42	158.75	23.71	24.54	158.585	24.125	-2.7167	1.80435e-157	1.72158e-156
TCF7L1	1714	1785	2772	2764	36.07	35.36	115.12	116.95	35.715	116.035	1.7	2.93304e-157	2.79604e-156
GAS2L3	4747	5335	186	195	99.9	105.67	7.72	8.25	102.785	7.985	-3.6862	2.99568e-157	2.85326e-156
CLCN2	1179	1158	2321	2300	24.81	22.94	96.39	97.31	23.875	96.85	2.0203	6.64133e-157	6.32003e-156
SERINC3	25551	26605	19026	18570	537.71	526.97	790.13	785.71	532.34	787.92	0.5657	9.87815e-157	9.39203e-156
CCDC177	6696	7327	15	15	140.91	145.13	0.62	0.63	143.02	0.625	-7.8381	1.08974e-156	1.03521e-155
PPDPF	6856	6922	8373	7475	144.28	137.11	347.72	316.27	140.695	331.995	1.2386	2.05354e-156	1.94906e-155
PLEKHB1	8741	8758	12	13	183.95	173.47	0.5	0.55	178.71	0.525	-8.4111	3.04181e-156	2.88454e-155
DCLRE1C	434	480	1428	1550	9.13	9.51	59.3	65.58	9.32	62.44	2.7441	3.92205e-156	3.71602e-155
SUSD3	695	899	2147	2123	14.63	17.81	89.16	89.83	16.22	89.495	2.464	9.73149e-156	9.21225e-155
SLC35B2	2314	2558	3441	3328	48.7	50.67	142.9	140.81	49.685	141.855	1.5135	1.04215e-155	9.85689e-155
ST8SIA1	2420	2611	3365	3385	50.93	51.72	139.75	143.22	51.325	141.485	1.4629	2.42986e-155	2.29621e-154
KANK4	7860	7802	545	547	165.41	154.54	22.63	23.14	159.975	22.885	-2.8054	8.60676e-155	8.12628e-154
TOM1L1	835	975	1998	2042	17.57	19.31	82.98	86.4	18.44	84.69	2.1994	1.88189e-154	1.77528e-153
MITF	3783	4068	55	50	79.61	80.58	2.28	2.12	80.095	2.2	-5.1861	2.68135e-154	2.52727e-153
TRPM2	5319	5532	203	148	111.94	109.57	8.43	6.26	110.755	7.345	-3.9145	3.76389e-154	3.54452e-153
ARMH4	2829	2894	3716	3673	59.54	57.32	154.32	155.41	58.43	154.865	1.4062	4.93519e-154	4.64352e-153
DCTN1	20705	21214	17482	16432	435.73	420.19	726.01	695.25	427.96	710.63	0.7316	5.47956e-154	5.15126e-153
PTPN9	2292	2561	3422	3324	48.23	50.73	142.11	140.64	49.48	141.375	1.5146	7.01369e-154	6.58777e-153
GPR162	4922	4897	181	179	103.58	97	7.52	7.57	100.29	7.545	-3.7325	7.2689e-154	6.82158e-153
GRB10	4095	4499	117	121	86.18	89.11	4.86	5.12	87.645	4.99	-4.1346	8.7723e-154	8.22535e-153
MCCC2	2614	2714	3523	3479	55.01	53.76	146.31	147.2	54.385	146.755	1.4321	1.10816e-153	1.03817e-152
TRIM47	5767	6046	325	305	121.36	119.75	13.5	12.9	120.555	13.2	-3.1911	1.14161e-153	1.06858e-152
NECAP2	3529	3579	4403	4241	74.27	70.89	182.85	179.44	72.58	181.145	1.3195	2.20646e-153	2.06355e-152
ACSL6	1420	1339	2591	2693	29.88	26.52	107.6	113.94	28.2	110.77	1.9738	2.29564e-153	2.1451e-152
PTPRO	510	492	1605	1508	10.73	9.75	66.65	63.8	10.24	65.225	2.6712	2.79414e-153	2.60866e-152
SMPX	3859	4024	50	42	81.21	79.7	2.08	1.78	80.455	1.93	-5.3815	4.3201e-153	4.02986e-152
SARAF	8169	8868	629	692	171.91	175.65	26.12	29.28	173.78	27.7	-2.6493	4.61951e-153	4.30546e-152
SLC26A2	3956	4295	66	89	83.25	85.07	2.74	3.77	84.16	3.255	-4.6924	5.52702e-153	5.14686e-152
RHOBTB2	5701	5756	6159	5901	119.97	114.01	255.78	249.67	116.99	252.725	1.1112	1.55346e-152	1.44537e-151
MET	4809	5375	210	216	101.2	106.46	8.72	9.14	103.83	8.93	-3.5394	2.01447e-152	1.8727e-151
DGKE	4350	4711	155	141	91.54	93.31	6.44	5.97	92.425	6.205	-3.8968	2.15635e-152	2.00288e-151
CREBRF	3771	4021	54	45	79.36	79.64	2.24	1.9	79.5	2.07	-5.2633	3.49442e-152	3.24294e-151
JAK1	14685	15864	1479	1689	309.04	314.22	61.42	71.46	311.63	66.44	-2.2297	7.94328e-152	7.36534e-151
RHPN1	2500	2472	3505	3460	52.61	48.96	145.56	146.39	50.785	145.975	1.5232	1.14711e-151	1.06274e-150
FKBP10	5256	5368	5494	5483	110.61	106.33	228.16	231.99	108.47	230.075	1.0848	2.0507e-151	1.89826e-150
HECTD1	8442	8580	8515	7975	177.66	169.95	353.62	337.43	173.805	345.525	0.9913	2.13463e-151	1.97426e-150
UNC119B	6439	6844	316	385	135.51	135.56	13.12	16.29	135.535	14.705	-3.2043	2.24775e-151	2.07711e-150
IFI35	4658	4858	152	179	98.03	96.22	6.31	7.57	97.125	6.94	-3.8068	2.88204e-151	2.66098e-150
CD9	22252	23790	16768	16318	468.28	471.21	696.36	690.42	469.745	693.39	0.5618	3.05548e-151	2.81873e-150
CBX8	690	735	1691	1779	14.52	14.56	70.23	75.27	14.54	72.75	2.3229	4.24895e-151	3.91639e-150
FAM131A	165	167	1147	984	3.47	3.31	47.63	41.63	3.39	44.63	3.7187	9.70198e-151	8.93503e-150
INHBB	2285	2208	3701	3402	48.09	43.73	153.7	143.94	45.91	148.82	1.6967	1.09534e-150	1.0079e-149
DSP	24100	25267	3429	3677	507.17	500.47	142.4	155.58	503.82	148.99	-1.7577	1.41325e-150	1.29933e-149
WFS1	4096	4451	4648	4631	86.2	88.16	193.03	195.94	87.18	194.485	1.1576	1.90401e-150	1.74905e-149
PHLDB1	6707	7595	7132	6897	141.15	150.44	296.19	291.82	145.795	294.005	1.0119	1.95532e-150	1.79466e-149
COQ8A	4817	4889	5466	5203	101.37	96.84	227	220.14	99.105	223.57	1.1737	4.18307e-150	3.83613e-149
RGS16	7	19	1273	1287	0.15	0.38	52.87	54.45	0.265	53.66	7.6617	5.51692e-150	5.05508e-149
PLD3	2175	2254	3077	3135	45.77	44.65	127.79	132.64	45.21	130.215	1.5262	6.30737e-150	5.77449e-149
TUBA1A	44236	44908	7305	6834	930.93	889.5	303.37	289.15	910.215	296.26	-1.6193	6.72214e-150	6.14903e-149
MX1	5001	4833	167	181	105.24	95.73	6.94	7.66	100.485	7.3	-3.7829	1.05561e-149	9.64803e-149
NOTCH2	20260	20983	2971	2953	426.36	415.61	123.38	124.94	420.985	124.16	-1.7616	1.09718e-149	1.00195e-148
YBX3	5190	5120	219	215	109.22	101.41	9.09	9.1	105.315	9.095	-3.5335	3.38449e-149	3.08814e-148
CTNNA2	6790	7648	456	498	142.89	151.49	18.94	21.07	147.19	20.005	-2.8792	3.72757e-149	3.39832e-148
COPB1	7281	8177	7417	7184	153.23	161.96	308.02	303.96	157.595	305.99	0.9573	5.46281e-149	4.97611e-148
GTPBP2	2577	2699	3397	3430	54.23	53.46	141.07	145.12	53.845	143.095	1.4101	6.45022e-149	5.87062e-148
TMCO4	786	836	1798	1811	16.54	16.56	74.67	76.62	16.55	75.645	2.1924	6.47958e-149	5.8924e-148
PAPPA	848	886	1864	1869	17.85	17.55	77.41	79.08	17.7	78.245	2.1442	6.71301e-149	6.09957e-148
NBEAL2	9728	10218	959	979	204.72	202.39	39.83	41.42	203.555	40.625	-2.325	6.96439e-149	6.32269e-148
RPS6KA5	3693	3984	44	39	77.72	78.91	1.83	1.65	78.315	1.74	-5.4921	8.4616e-149	7.67552e-148
MVB12B	8377	8728	716	738	176.29	172.88	29.73	31.23	174.585	30.48	-2.518	1.10275e-148	9.99468e-148
DDX42	6578	6689	7779	6977	138.43	132.49	323.05	295.2	135.46	309.125	1.1903	1.27289e-148	1.15272e-147
KAT6A	7691	8213	7314	7063	161.85	162.68	303.74	298.84	162.265	301.29	0.8928	2.0717e-148	1.87454e-147
GPSM2	15739	17205	2055	1887	331.22	340.78	85.34	79.84	336	82.59	-2.0244	2.28083e-148	2.06206e-147
INO80D	3711	4304	49	34	78.1	85.25	2.03	1.44	81.675	1.735	-5.5569	2.90652e-148	2.62554e-147
SDSL	157	156	1010	943	3.3	3.09	41.94	39.9	3.195	40.92	3.6789	3.75912e-148	3.39289e-147
PLEKHG5	8788	9108	789	735	184.94	180.4	32.77	31.1	182.67	31.935	-2.516	5.67919e-148	5.12165e-147
NAV3	3658	3848	55	59	76.98	76.22	2.28	2.5	76.6	2.39	-5.0023	6.17072e-148	5.5603e-147
SEMA6C	278	290	1189	1142	5.85	5.74	49.38	48.32	5.795	48.85	3.0755	6.64297e-148	5.98088e-147
EPHB2	2073	2328	3884	3372	43.63	46.11	161.3	142.67	44.87	151.985	1.7601	8.82239e-148	7.93649e-147
SLC4A2	6146	6440	384	400	129.34	127.56	15.95	16.92	128.45	16.435	-2.9664	1.10588e-147	9.94014e-147
LMX1B	783	738	1995	1842	16.48	14.62	82.85	77.94	15.55	80.395	2.3702	1.44108e-147	1.29423e-146
GRAMD4	5552	6060	330	322	116.84	120.03	13.7	13.62	118.435	13.66	-3.1161	1.4876e-147	1.3349e-146
PODN	5210	5908	241	275	109.64	117.02	10.01	11.64	113.33	10.825	-3.3881	1.53691e-147	1.37801e-146
ARRDC1	7403	8236	557	477	155.79	163.13	23.13	20.18	159.46	21.655	-2.8804	1.67676e-147	1.50217e-146
RGS11	6033	6523	327	255	126.96	129.2	13.58	10.79	128.08	12.185	-3.3939	2.36521e-147	2.11719e-146
ATL1	5162	5742	273	277	108.63	113.73	11.34	11.72	111.18	11.53	-3.2694	2.61855e-147	2.34203e-146
FKBP14	2207	2591	3525	3905	46.45	51.32	146.39	165.22	48.885	155.805	1.6723	2.87783e-147	2.5718e-146
RCOR1	4295	4617	138	159	90.39	91.45	5.73	6.73	90.92	6.23	-3.8673	5.79568e-147	5.17512e-146
TRANK1	5411	5978	307	313	113.87	118.41	12.75	13.24	116.14	12.995	-3.1598	6.2132e-147	5.54338e-146
SECISBP2L	6476	7327	464	439	136.28	145.13	19.27	18.57	140.705	18.92	-2.8947	7.05338e-147	6.28782e-146
FARP1	3061	3220	4042	3798	64.42	63.78	167.86	160.7	64.1	164.28	1.3578	1.01222e-146	9.01613e-146
HMOX2	4402	4541	5130	4832	92.64	89.94	213.04	204.44	91.29	208.74	1.1932	1.32796e-146	1.18189e-145
DVL1	9680	10795	1001	994	203.71	213.82	41.57	42.06	208.765	41.815	-2.3198	2.88741e-146	2.56769e-145
PCGF2	507	539	1519	1443	10.67	10.68	63.08	61.05	10.675	62.065	2.5395	5.36052e-146	4.76305e-145
ACP5	747	661	2018	1882	15.72	13.09	83.81	79.63	14.405	81.72	2.5041	5.5486e-146	4.92614e-145
ARHGDIA	21135	22387	3289	3317	444.78	443.42	136.59	140.34	444.1	138.465	-1.6814	5.72058e-146	5.07468e-145
PITPNC1	1825	2113	3060	2953	38.41	41.85	127.08	124.94	40.13	126.01	1.6508	9.69302e-146	8.59158e-145
STARD10	23080	23629	3508	3480	485.71	468.02	145.68	147.24	476.865	146.46	-1.7031	1.30336e-145	1.15431e-144
JPH1	4653	4955	147	187	97.92	98.14	6.1	7.91	98.03	7.005	-3.8068	1.68786e-145	1.49362e-144
EIF4ENIF1	2919	2874	3753	3795	61.43	56.93	155.86	160.57	59.18	158.215	1.4187	2.49646e-145	2.20737e-144
MXD4	3583	3956	59	71	75.4	78.36	2.45	3	76.88	2.725	-4.8183	2.61286e-145	2.30841e-144
AASS	3072	3013	3884	4034	64.65	59.68	161.3	170.68	62.165	165.99	1.4169	3.31607e-145	2.92731e-144
CSRP1	3661	3745	60	61	77.04	74.18	2.49	2.58	75.61	2.535	-4.8985	5.24463e-145	4.62601e-144
AOC3	611	557	1765	1642	12.86	11.03	73.3	69.47	11.945	71.385	2.5792	5.367e-145	4.73011e-144
TUBB4B	45483	47080	8303	7939	957.17	932.52	344.82	335.9	944.845	340.36	-1.473	6.13614e-145	5.40359e-144
MCFD2	6093	6904	397	416	128.22	136.75	16.49	17.6	132.485	17.045	-2.9584	7.04616e-145	6.19993e-144
ARSA	3778	4311	28	31	79.51	85.39	1.16	1.31	82.45	1.235	-6.0609	7.07513e-145	6.22038e-144
TESK2	4787	5247	235	223	100.74	103.93	9.76	9.44	102.335	9.6	-3.4141	8.09468e-145	7.111e-144
ERN1	4787	4833	5130	5081	100.74	95.73	213.04	214.98	98.235	214.01	1.1234	1.22917e-144	1.07893e-143
LRCH3	5484	6161	19	12	115.41	122.03	0.79	0.51	118.72	0.65	-7.5129	1.29376e-144	1.1347e-143
MICU2	2098	2456	3634	3331	44.15	48.65	150.92	140.94	46.4	145.93	1.6531	1.59297e-144	1.396e-143
RAB10	10430	10999	9170	8805	219.49	217.86	380.82	372.54	218.675	376.68	0.7846	1.79398e-144	1.57089e-143
NAAA	1430	1486	2378	2455	30.09	29.43	98.76	103.87	29.76	101.315	1.7674	2.10885e-144	1.84512e-143
UNC79	6478	6925	375	439	136.33	137.16	15.57	18.57	136.745	17.07	-3.002	3.84226e-144	3.35904e-143
HNRNPC	2427	2396	3317	3347	51.08	47.46	137.75	141.61	49.27	139.68	1.5033	8.96963e-144	7.83526e-143
EIF3E	11095	12084	10016	9502	233.49	239.35	415.96	402.03	236.42	408.995	0.7907	1.03377e-143	9.02303e-143
SH3BP4	14417	14661	1748	1645	303.4	290.39	72.59	69.6	296.895	71.095	-2.0621	1.14053e-143	9.94691e-143
COX7A2	5593	5859	5559	5826	117.7	116.05	230.86	246.5	116.875	238.68	1.0301	1.39349e-143	1.21433e-142
LRWD1	3913	4137	114	94	82.35	81.94	4.73	3.98	82.145	4.355	-4.2374	2.04672e-143	1.78214e-142
CDK5RAP2	7402	7966	626	590	155.77	157.78	26	24.96	156.775	25.48	-2.6213	3.9476e-143	3.43454e-142
COX11	1187	1264	2213	2151	24.98	25.04	91.9	91.01	25.01	91.455	1.8706	4.41091e-143	3.83456e-142
HCFC2	3774	4330	100	111	79.42	85.77	4.15	4.7	82.595	4.425	-4.2223	5.00066e-143	4.34377e-142
RIMKLB	627	819	2309	1986	13.19	16.22	95.89	84.03	14.705	89.96	2.613	5.66297e-143	4.91515e-142
CMPK2	3872	4131	108	119	81.48	81.82	4.49	5.03	81.65	4.76	-4.1004	1.95292e-142	1.69367e-141
AMOTL1	2365	2463	3307	3162	49.77	48.79	137.34	133.79	49.28	135.565	1.4599	2.56378e-142	2.22167e-141
TRPM8	60	51	754	833	1.26	1.01	31.31	35.24	1.135	33.275	4.8737	2.70438e-142	2.34164e-141
LRCH2	3526	4072	65	77	74.2	80.65	2.7	3.26	77.425	2.98	-4.6994	3.95445e-142	3.42131e-141
GALNT6	9958	10816	762	912	209.56	214.23	31.65	38.59	211.895	35.12	-2.593	4.3327e-142	3.74558e-141
EIF3F	5168	4918	15	22	108.76	97.41	0.62	0.93	103.085	0.775	-7.0554	4.44218e-142	3.83716e-141
SIGMAR1	2354	2425	3560	3249	49.54	48.03	147.84	137.47	48.785	142.655	1.548	5.60866e-142	4.84092e-141
SLC6A6	5799	6653	375	341	122.04	131.78	15.57	14.43	126.91	15	-3.0808	8.22073e-142	7.08981e-141
ADCY3	1289	1567	2730	2562	27.13	31.04	113.37	108.4	29.085	110.885	1.9307	8.73078e-142	7.52372e-141
SH3BP5L	1196	1164	2189	2297	25.17	23.06	90.91	97.19	24.115	94.05	1.9635	1.3801e-141	1.18835e-140
NXPH1	5390	5474	22	10	113.43	108.42	0.91	0.42	110.925	0.665	-7.382	3.25928e-141	2.80422e-140
RNF149	7836	8837	670	706	164.91	175.04	27.82	29.87	169.975	28.845	-2.5589	3.80271e-141	3.26918e-140
PYGB	17698	18299	3	11	372.45	362.45	0.12	0.47	367.45	0.295	-10.2826	4.26452e-141	3.6633e-140
HTATIP2	571	610	1499	1518	12.02	12.08	62.25	64.23	12.05	63.24	2.3918	1.29402e-140	1.11071e-139
ANGPTL2	1733	1851	2993	2709	36.47	36.66	124.3	114.62	36.565	119.46	1.708	1.41275e-140	1.21167e-139
ABCA2	17634	18076	14777	13878	371.1	358.04	613.68	587.18	364.57	600.43	0.7198	1.48711e-140	1.27443e-139
STAT1	18256	19785	2749	2792	384.19	391.89	114.16	118.13	388.04	116.145	-1.7403	1.56139e-140	1.33703e-139
LRPAP1	12440	13000	9919	10238	261.79	257.49	411.93	433.17	259.64	422.55	0.7026	1.72383e-140	1.47496e-139
ANKRD9	811	828	2061	1811	17.07	16.4	85.59	76.62	16.735	81.105	2.2769	1.98937e-140	1.70083e-139
SCGN	149	107	3574	3465	3.14	2.12	148.43	146.61	2.63	147.52	5.8097	2.47206e-140	2.11185e-139
SLC7A5	11375	11696	9773	10542	239.38	231.67	405.86	446.04	235.525	425.95	0.8548	2.496e-140	2.13063e-139
MAP4	27792	29638	4899	4834	584.87	587.05	203.45	204.53	585.96	203.99	-1.5223	2.92386e-140	2.4939e-139
GANAB	3171	3098	4186	3949	66.73	61.36	173.84	167.08	64.045	170.46	1.4123	4.23747e-140	3.6115e-139
ELOB	3603	3789	4881	4367	75.82	75.05	202.7	184.77	75.435	193.735	1.3608	4.33832e-140	3.69455e-139
STK11IP	1964	1912	3166	2937	41.33	37.87	131.48	124.27	39.6	127.875	1.6912	4.4713e-140	3.80481e-139
COL4A1	7506	7822	6796	6755	157.96	154.93	282.23	285.81	156.445	284.02	0.8603	6.36077e-140	5.4084e-139
GADL1	7577	7952	480	364	159.45	157.51	19.93	15.4	158.48	17.665	-3.1653	6.60723e-140	5.61356e-139
CAMSAP2	3733	4303	113	111	78.56	85.23	4.69	4.7	81.895	4.695	-4.1246	7.24638e-140	6.15177e-139
IRF5	554	577	1719	1501	11.66	11.43	71.39	63.51	11.545	67.45	2.5466	7.82752e-140	6.63994e-139
PYGL	5975	6710	6044	6112	125.74	132.91	251	258.6	129.325	254.8	0.9784	9.03624e-140	7.65929e-139
COL8A2	21122	22823	47	26	444.5	452.06	1.95	1.1	448.28	1.525	-8.1994	1.24038e-139	1.05055e-138
AMOTL2	3159	3198	3830	3787	66.48	63.34	159.06	160.23	64.91	159.645	1.2984	1.25539e-139	1.06244e-138
NAGA	2218	2222	3087	3329	46.68	44.01	128.2	140.85	45.345	134.525	1.5689	1.63693e-139	1.38426e-138
NDUFC2	2763	2897	3622	3449	58.15	57.38	150.42	145.93	57.765	148.175	1.359	2.65247e-139	2.24129e-138
STXBP6	830	959	1849	1944	17.47	19	76.79	82.25	18.235	79.52	2.1246	6.03741e-139	5.09753e-138
TK2	5017	5506	274	285	105.58	109.06	11.38	12.06	107.32	11.72	-3.1949	7.0157e-139	5.91892e-138
PCDH7	1433	1549	2365	2383	30.16	30.68	98.22	100.83	30.42	99.525	1.71	9.04112e-139	7.62177e-138
ARHGEF6	3795	4071	106	120	79.86	80.64	4.4	5.08	80.25	4.74	-4.0815	9.57268e-139	8.06363e-138
PDS5A	4747	4779	5059	4970	99.9	94.66	210.1	210.28	97.28	210.19	1.1115	1.01959e-138	8.58195e-138
PDPK1	7885	8935	553	652	165.94	176.98	22.97	27.59	171.46	25.28	-2.7618	1.07977e-138	9.08144e-138
EGFL6	3378	3887	59	67	71.09	76.99	2.45	2.83	74.04	2.64	-4.8097	1.50614e-138	1.26577e-137
ADPRH	13665	14030	1703	1614	287.57	277.9	70.72	68.29	282.735	69.505	-2.0243	2.80039e-138	2.35164e-137
AZIN2	1329	1269	2863	2471	27.97	25.14	118.9	104.55	26.555	111.725	2.0729	2.90535e-138	2.43789e-137
IL1RAP	7942	8269	507	614	167.14	163.79	21.06	25.98	165.465	23.52	-2.8146	4.93513e-138	4.13789e-137
PELO	1846	2106	3070	2864	38.85	41.71	127.49	121.18	40.28	124.335	1.6261	6.13902e-138	5.14333e-137
DCLK1	4769	5587	243	243	100.36	110.66	10.09	10.28	105.51	10.185	-3.3729	8.10857e-138	6.78819e-137
FBLN5	2820	3053	3509	3514	59.35	60.47	145.73	148.68	59.91	147.205	1.297	9.5367e-138	7.97762e-137
GTF2H5	4325	5045	177	192	91.02	99.93	7.35	8.12	95.475	7.735	-3.6256	1.17311e-137	9.80574e-137
KAT2B	7807	8871	694	716	164.29	175.71	28.82	30.29	170	29.555	-2.5241	1.73562e-137	1.44964e-136
PPP3CB	2716	3113	3625	3805	57.16	61.66	150.54	160.99	59.41	155.765	1.3906	1.87011e-137	1.56077e-136
SDK2	3397	3577	45	42	71.49	70.85	1.87	1.78	71.17	1.825	-5.2853	2.3115e-137	1.92767e-136
FAM171A1	4730	4909	4897	4843	99.54	97.23	203.37	204.91	98.385	204.14	1.053	5.11378e-137	4.26136e-136
FA2H	2261	2461	3065	3080	47.58	48.75	127.29	130.32	48.165	128.805	1.4191	5.38426e-137	4.48331e-136
RNLS	300	361	1284	1183	6.31	7.15	53.32	50.05	6.73	51.685	2.9411	6.4463e-137	5.36352e-136
THSD7A	3953	4532	137	106	83.19	89.77	5.69	4.48	86.48	5.085	-4.088	1.0124e-136	8.41701e-136
RASL12	205	169	1075	1032	4.31	3.35	44.64	43.66	3.83	44.15	3.527	1.09846e-136	9.12553e-136
TAF10	1187	977	2972	2647	24.98	19.35	123.42	112	22.165	117.71	2.4089	1.19291e-136	9.90262e-136
AIFM1	4034	4491	4856	4567	84.89	88.95	201.67	193.23	86.92	197.45	1.1837	1.28049e-136	1.06215e-135
PFKFB1	141	154	878	893	2.97	3.05	36.46	37.78	3.01	37.12	3.6244	1.31906e-136	1.09331e-135
LIMCH1	14038	14307	11028	11375	295.42	283.38	457.98	481.28	289.4	469.63	0.6985	1.76631e-136	1.46289e-135
PIP5K1A	1430	1442	2517	2345	30.09	28.56	104.53	99.22	29.325	101.875	1.7966	2.07584e-136	1.71794e-135
COL9A1	40539	42226	27344	26689	853.12	836.38	1135.57	1129.22	844.75	1132.39	0.4228	2.66041e-136	2.20005e-135
FAM222B	3413	3943	48	68	71.83	78.1	1.99	2.88	74.965	2.435	-4.9442	3.90098e-136	3.22351e-135
RBFOX2	7704	8166	7492	8371	162.13	161.75	311.14	354.18	161.94	332.66	1.0386	4.16406e-136	3.43828e-135
CACNA2D4	420	416	1280	1305	8.84	8.24	53.16	55.22	8.54	54.19	2.6657	1.04611e-135	8.6312e-135
STAU2	6397	6587	6197	5991	134.62	130.47	257.36	253.48	132.545	255.42	0.9464	1.33723e-135	1.10248e-134
OLAH	49	51	702	843	1.03	1.01	29.15	35.67	1.02	32.41	4.9898	1.60868e-135	1.32527e-134
KIF13B	13724	14272	1757	1640	288.82	282.69	72.97	69.39	285.755	71.18	-2.0052	1.65978e-135	1.36633e-134
SELENOS	5150	5769	5363	5381	108.38	114.27	222.72	227.67	111.325	225.195	1.0164	2.14589e-135	1.76516e-134
KCNA6	4860	4885	15	18	102.28	96.76	0.62	0.76	99.52	0.69	-7.1722	2.20478e-135	1.81222e-134
ERO1B	4620	5116	236	241	97.23	101.33	9.8	10.2	99.28	10	-3.3115	2.42224e-135	1.98946e-134
TIA1	10086	10726	1141	1100	212.26	212.45	47.38	46.54	212.355	46.96	-2.177	2.67384e-135	2.19445e-134
POMGNT1	4093	4267	150	121	86.14	84.52	6.23	5.12	85.33	5.675	-3.9104	5.90114e-135	4.83947e-134
CFAP43	4766	5132	237	193	100.3	101.65	9.84	8.17	100.975	9.005	-3.4871	6.27457e-135	5.14183e-134
PTP4A1	12171	13223	1442	1540	256.13	261.91	59.88	65.16	259.02	62.52	-2.0507	6.59396e-135	5.39949e-134
LRP5	4421	4532	4911	4661	93.04	89.77	203.95	197.21	91.405	200.58	1.1338	7.05393e-135	5.77178e-134
DGKK	34	36	698	744	0.72	0.71	28.99	31.48	0.715	30.235	5.4021	7.41786e-135	6.06499e-134
VANGL2	1646	1715	2496	2521	34.64	33.97	103.66	106.66	34.305	105.16	1.6161	7.4732e-135	6.10565e-134
COPA	26006	27392	19875	18735	547.28	542.56	825.39	792.69	544.92	809.04	0.5702	8.40706e-135	6.86345e-134
PCYT1B	922	848	1959	1953	19.4	16.8	81.36	82.63	18.1	81.995	2.1795	1.01679e-134	8.29478e-134
AGAP1	4222	4712	4660	4639	88.85	93.33	193.53	196.28	91.09	194.905	1.0974	1.27532e-134	1.0396e-133
CRY2	11932	12328	1442	1398	251.1	244.18	59.88	59.15	247.64	59.515	-2.0569	1.2864e-134	1.04784e-133
BMPR1A	3261	3708	53	61	68.63	73.45	2.2	2.58	71.04	2.39	-4.8935	1.42133e-134	1.15688e-133
NR2C2	3718	4190	117	128	78.24	82.99	4.86	5.42	80.615	5.14	-3.9712	1.56717e-134	1.27463e-133
PHC2	5527	5661	341	320	116.31	112.13	14.16	13.54	114.22	13.85	-3.0439	1.68778e-134	1.3717e-133
SLC25A1	4407	4662	199	207	92.74	92.34	8.26	8.76	92.54	8.51	-3.4428	2.03562e-134	1.65316e-133
PSMD5	2148	2379	2989	2995	45.2	47.12	124.13	126.72	46.16	125.425	1.4421	2.16918e-134	1.76031e-133
FGF10	5431	6509	272	320	114.29	128.93	11.3	13.54	121.61	12.42	-3.2915	2.97375e-134	2.41142e-133
HINT1	729	579	2207	2008	15.34	11.47	91.65	84.96	13.405	88.305	2.7197	3.06516e-134	2.4837e-133
IER5	2260	2348	3229	3020	47.56	46.51	134.1	127.78	47.035	130.94	1.4771	3.61761e-134	2.92916e-133
ST8SIA6	3390	3794	27	40	71.34	75.15	1.12	1.69	73.245	1.405	-5.7041	3.6425e-134	2.94711e-133
MSRB3	6576	7049	520	471	138.39	139.62	21.6	19.93	139.005	20.765	-2.7429	3.90469e-134	3.15689e-133
GXYLT2	3361	4085	75	73	70.73	80.91	3.11	3.09	75.82	3.1	-4.6122	5.16823e-134	4.17535e-133
STK39	5943	6554	348	409	125.07	129.82	14.45	17.3	127.445	15.875	-3.005	5.20763e-134	4.20405e-133
RIN3	378	381	1207	1247	7.95	7.55	50.13	52.76	7.75	51.445	2.7308	5.93833e-134	4.79037e-133
ARF6	5680	6120	395	384	119.53	121.22	16.4	16.25	120.375	16.325	-2.8824	7.64866e-134	6.16549e-133
RBM34	1422	1688	2525	2595	29.93	33.43	104.86	109.8	31.68	107.33	1.7604	7.68001e-134	6.18616e-133
FBN2	402	472	1308	1326	8.46	9.35	54.32	56.1	8.905	55.21	2.6322	8.42667e-134	6.78257e-133
FAM168B	8036	8931	632	506	169.11	176.9	26.25	21.41	173.005	23.83	-2.86	8.88636e-134	7.14727e-133
NAT8L	9870	11075	7	10	207.71	219.36	0.29	0.42	213.535	0.355	-9.2324	1.51825e-133	1.22022e-132
CLDN1	31896	34087	5674	5900	671.24	675.17	235.64	249.63	673.205	242.635	-1.4723	1.60016e-133	1.2851e-132
COL1A2	63385	67323	12748	12042	1333.91	1333.48	529.41	509.5	1333.69	519.455	-1.3604	1.75243e-133	1.40635e-132
NELL2	6313	6891	495	460	132.85	136.49	20.56	19.46	134.67	20.01	-2.7506	1.83672e-133	1.4729e-132
CUL3	6508	7385	508	526	136.96	146.28	21.1	22.26	141.62	21.68	-2.7076	3.16037e-133	2.53249e-132
PMVK	1339	1495	2361	2265	28.18	29.61	98.05	95.83	28.895	96.94	1.7463	4.89363e-133	3.91851e-132
PMFBP1	241	265	1099	1016	5.07	5.25	45.64	42.99	5.16	44.315	3.1024	5.54996e-133	4.44079e-132
LEF1	1593	1491	2587	2670	33.52	29.53	107.44	112.97	31.525	110.205	1.8056	5.66343e-133	4.52824e-132
GNG12	3320	3490	49	38	69.87	69.13	2.03	1.61	69.5	1.82	-5.255	7.30462e-133	5.83617e-132
GARNL3	3836	4034	93	123	80.73	79.9	3.86	5.2	80.315	4.53	-4.1481	1.04533e-132	8.34577e-132
COL6A1	2071	2265	2867	2903	43.58	44.86	119.06	122.83	44.22	120.945	1.4516	1.0813e-132	8.62659e-132
IL34	3477	3434	36	42	73.17	68.02	1.5	1.78	70.595	1.64	-5.4278	1.15773e-132	9.2295e-132
PCGF3	3196	3690	39	45	67.26	73.09	1.62	1.9	70.175	1.76	-5.3173	1.77561e-132	1.41449e-131
MYSM1	2261	2534	3158	3464	47.58	50.19	131.15	146.56	48.885	138.855	1.5061	1.96667e-132	1.56555e-131
UBR2	3641	4035	4427	4172	76.62	79.92	183.85	176.52	78.27	180.185	1.2029	2.6155e-132	2.08052e-131
NINL	1195	1618	3119	2909	25.15	32.05	129.53	123.08	28.6	126.305	2.1428	3.63391e-132	2.8885e-131
TBC1D9	7529	8138	697	647	158.44	161.19	28.95	27.37	159.815	28.16	-2.5047	4.59719e-132	3.65152e-131
TGFBR1	3587	4029	84	109	75.49	79.8	3.49	4.61	77.645	4.05	-4.2609	6.05622e-132	4.8069e-131
EOGT	830	942	1768	1875	17.47	18.66	73.42	79.33	18.065	76.375	2.0799	8.09417e-132	6.41976e-131
VGLL4	6587	7088	6446	6122	138.62	140.39	267.7	259.02	139.505	263.36	0.9167	9.75085e-132	7.72808e-131
NCBP3	1442	1614	2356	2402	30.35	31.97	97.84	101.63	31.16	99.735	1.6784	1.00242e-131	7.93896e-131
CTTNBP2NL	3384	3477	67	73	71.21	68.87	2.78	3.09	70.04	2.935	-4.5767	1.09653e-131	8.67791e-131
TIMM17B	11260	12319	1410	1384	236.96	244.01	58.56	58.56	240.485	58.56	-2.038	1.11563e-131	8.82265e-131
DNAJA2	5175	5717	5258	5215	108.91	113.24	218.36	220.65	111.075	219.505	0.9827	1.12358e-131	8.8791e-131
SOCS2	3466	3684	93	95	72.94	72.97	3.86	4.02	72.955	3.94	-4.2107	1.41898e-131	1.12053e-130
MIDN	1226	1207	2137	2144	25.8	23.91	88.75	90.71	24.855	89.73	1.8521	1.74439e-131	1.3765e-130
OSBPL11	6383	6611	5950	5876	134.33	130.95	247.1	248.62	132.64	247.86	0.902	2.18367e-131	1.72188e-130
HSPA12A	4485	5069	199	230	94.38	100.4	8.26	9.73	97.39	8.995	-3.4366	2.53781e-131	1.99967e-130
VASP	859	773	2149	1904	18.08	15.31	89.25	80.56	16.695	84.905	2.3464	2.75704e-131	2.17084e-130
ABCA3	21424	22689	3429	3215	450.86	449.41	142.4	136.03	450.135	139.215	-1.693	3.74658e-131	2.94785e-130
KIF26B	224	226	1003	976	4.71	4.48	41.65	41.3	4.595	41.475	3.1741	4.4299e-131	3.48297e-130
CDC42EP4	3803	3984	131	108	80.03	78.91	5.44	4.57	79.47	5.005	-3.989	5.15054e-131	4.04664e-130
GPD1	2043	2042	2817	2877	42.99	40.45	116.99	121.73	41.72	119.36	1.5165	7.04836e-131	5.5337e-130
ZCCHC24	3218	3668	44	32	67.72	72.65	1.83	1.35	70.185	1.59	-5.4641	7.86339e-131	6.16913e-130
RSAD2	3279	3677	59	39	69.01	72.83	2.45	1.65	70.92	2.05	-5.1125	7.9055e-131	6.19768e-130
BNIP3	3366	3594	3818	3812	70.84	71.19	158.56	161.29	71.015	159.925	1.1712	8.91346e-131	6.98286e-130
ARL5A	8477	9268	881	880	178.39	183.57	36.59	37.23	180.98	36.91	-2.2937	1.60158e-130	1.25378e-129
PACSIN1	6684	7002	465	528	140.66	138.69	19.31	22.34	139.675	20.825	-2.7457	2.56163e-130	2.0039e-129
ANKRD29	882	1006	1820	1928	18.56	19.93	75.58	81.57	19.245	78.575	2.0296	2.71323e-130	2.12097e-129
NR1D2	7185	7466	509	404	151.21	147.88	21.14	17.09	149.545	19.115	-2.9678	2.77704e-130	2.16929e-129
PCP4L1	50	38	728	703	1.05	0.75	30.23	29.74	0.9	29.985	5.0582	2.97048e-130	2.31872e-129
RNF4	4238	4419	190	190	89.19	87.53	7.89	8.04	88.36	7.965	-3.4716	6.28664e-130	4.90376e-129
VPS13C	4943	5355	4925	4980	104.02	106.07	204.53	210.71	105.045	207.62	0.9829	6.5028e-130	5.06873e-129
ABCB6	1654	1678	2721	2500	34.81	33.24	113	105.78	34.025	109.39	1.6848	6.52762e-130	5.08443e-129
MAPKAP1	1893	2067	2816	2688	39.84	40.94	116.95	113.73	40.39	115.34	1.5138	6.73671e-130	5.24353e-129
BBOF1	222	276	1050	1058	4.67	5.47	43.61	44.76	5.07	44.185	3.1235	7.69949e-130	5.98862e-129
BICRA	1639	1615	2538	2486	34.49	31.99	105.4	105.18	33.24	105.29	1.6634	9.79889e-130	7.61606e-129
ETV1	1065	1136	1996	1930	22.41	22.5	82.89	81.66	22.455	82.275	1.8734	9.84543e-130	7.64676e-129
CCT4	9578	10221	1084	1074	201.56	202.45	45.02	45.44	202.005	45.23	-2.159	1.03493e-129	8.03232e-129
RBPMS	4019	4182	95	135	84.58	82.83	3.95	5.71	83.705	4.83	-4.1152	1.04286e-129	8.08812e-129
WASHC1	2538	2797	3532	3279	53.41	55.4	146.68	138.74	54.405	142.71	1.3913	1.16349e-129	9.01722e-129
CYSTM1	10793	11156	1262	1253	227.13	220.97	52.41	53.02	224.05	52.715	-2.0875	1.37917e-129	1.06812e-128
REEP2	3847	4101	75	115	80.96	81.23	3.11	4.87	81.095	3.99	-4.3452	4.25508e-129	3.29306e-128
FADS2	23263	24292	16253	16060	489.56	481.16	674.97	679.51	485.36	677.24	0.4806	4.95127e-129	3.82912e-128
NRARP	1109	1050	2322	2077	23.34	20.8	96.43	87.88	22.07	92.155	2.062	1.18219e-128	9.13612e-128
CKAP5	6460	7169	6198	6081	135.95	142	257.4	257.29	138.975	257.345	0.8889	1.46983e-128	1.13509e-127
B3GNT9	3501	3475	83	70	73.68	68.83	3.45	2.96	71.255	3.205	-4.4746	1.47111e-128	1.13527e-127
VCPIP1	3887	4265	134	94	81.8	84.48	5.56	3.98	83.14	4.77	-4.1235	2.19773e-128	1.69481e-127
JAKMIP2	3580	3958	84	113	75.34	78.4	3.49	4.78	76.87	4.135	-4.2165	3.59607e-128	2.77119e-127
TMEM100	1500	1688	2391	2550	31.57	33.43	99.3	107.89	32.5	103.595	1.6724	4.82678e-128	3.71696e-127
ATP13A2	10451	11318	1209	1091	219.94	224.18	50.21	46.16	222.06	48.185	-2.2043	1.02963e-127	7.92329e-127
USPL1	7091	7755	489	584	149.23	153.6	20.31	24.71	151.415	22.51	-2.7499	2.14036e-127	1.64589e-126
SLC12A5	3683	3855	103	126	77.51	76.36	4.28	5.33	76.935	4.805	-4.001	2.24777e-127	1.72727e-126
BIN3	4774	4854	185	233	100.47	96.14	7.68	9.86	98.305	8.77	-3.4866	4.23741e-127	3.25388e-126
UST	4487	4543	181	132	94.43	89.98	7.52	5.58	92.205	6.55	-3.8153	5.91971e-127	4.54249e-126
ANO8	6427	6540	497	476	135.25	129.54	20.64	20.14	132.395	20.39	-2.6989	6.06396e-127	4.64989e-126
GLIS2	3931	3835	4334	4482	82.73	75.96	179.99	189.64	79.345	184.815	1.2199	7.37015e-127	5.6475e-126
ANAPC11	712	655	1619	1713	14.98	12.97	67.24	72.48	13.975	69.86	2.3216	9.16425e-127	7.01731e-126
FBLIM1	144	162	1026	848	3.03	3.21	42.61	35.88	3.12	39.245	3.6529	1.09993e-126	8.41653e-126
CHCHD2	22704	24091	3898	3777	477.8	477.18	161.88	159.81	477.49	160.845	-1.5698	1.27734e-126	9.76719e-126
FAM174B	6516	7101	409	496	137.13	140.65	16.99	20.99	138.89	18.99	-2.8706	2.07181e-126	1.58309e-125
STK32A	11508	11526	1318	1309	242.18	228.3	54.74	55.38	235.24	55.06	-2.0951	2.17538e-126	1.66106e-125
LMBR1L	254	312	1105	1068	5.35	6.18	45.89	45.19	5.765	45.54	2.9817	2.3471e-126	1.79092e-125
GALNT14	1376	1516	2403	2235	28.96	30.03	99.79	94.56	29.495	97.175	1.7201	2.35564e-126	1.79617e-125
INPP5J	5913	6038	337	398	124.44	119.6	14	16.84	122.02	15.42	-2.9842	5.14428e-126	3.91976e-125
CHRNA4	3368	3503	78	54	70.88	69.38	3.24	2.28	70.13	2.76	-4.6673	5.90875e-126	4.4991e-125
KCNA4	1041	1122	1916	1892	21.91	22.22	79.57	80.05	22.065	79.81	1.8548	7.08349e-126	5.3898e-125
CDC42EP3	783	859	1644	1677	16.48	17.01	68.27	70.95	16.745	69.61	2.0556	8.95537e-126	6.80934e-125
WDR81	4113	4575	165	196	86.56	90.62	6.85	8.29	88.59	7.57	-3.5488	1.18245e-125	8.98466e-125
SORL1	30148	31897	883	1087	634.45	631.79	36.67	45.99	633.12	41.33	-3.9372	1.48944e-125	1.13094e-124
MFGE8	10766	10910	1220	1233	226.57	216.1	50.67	52.17	221.335	51.42	-2.1058	1.90599e-125	1.44621e-124
RAP2B	812	798	1803	1666	17.09	15.81	74.88	70.49	16.45	72.685	2.1436	2.06018e-125	1.56211e-124
PAQR8	5972	6634	403	319	125.68	131.4	16.74	13.5	128.54	15.12	-3.0877	2.82741e-125	2.14236e-124
PACSIN2	7012	7741	6890	6486	147.56	153.33	286.14	274.43	150.445	280.285	0.8977	3.87903e-125	2.93713e-124
IL17RA	1848	1967	2579	2605	38.89	38.96	107.1	110.22	38.925	108.66	1.4811	4.07855e-125	3.08605e-124
KDELR2	7152	8154	6824	6828	150.51	161.51	283.39	288.9	156.01	286.145	0.8751	7.04592e-125	5.32762e-124
NRXN1	6186	6632	494	511	130.18	131.36	20.52	21.62	130.77	21.07	-2.6338	7.27852e-125	5.49967e-124
LANCL3	3523	3917	22	19	74.14	77.58	0.91	0.8	75.86	0.855	-6.4713	9.09122e-125	6.86456e-124
ATG13	13855	14980	1981	1882	291.57	296.71	82.27	79.63	294.14	80.95	-1.8614	1.43539e-124	1.08307e-123
BTBD1	3090	3341	40	55	65.03	66.18	1.66	2.33	65.605	1.995	-5.0393	1.52991e-124	1.15359e-123
SYT9	3475	3875	23	19	73.13	76.75	0.96	0.8	74.94	0.88	-6.4121	1.53944e-124	1.15997e-123
WNK4	11777	12678	1547	1568	247.84	251.12	64.25	66.34	249.48	65.295	-1.9339	1.61247e-124	1.21416e-123
ZSWIM8	5231	5507	5082	4984	110.08	109.08	211.05	210.88	109.58	210.965	0.945	1.71838e-124	1.29301e-123
FUT8	14615	16469	2087	1972	307.57	326.21	86.67	83.44	316.89	85.055	-1.8975	2.0784e-124	1.56283e-123
TSPAN15	7083	7424	606	646	149.06	147.05	25.17	27.33	148.055	26.25	-2.4957	2.71243e-124	2.03817e-123
AEBP1	9127	9511	7551	7485	192.07	188.39	313.59	316.69	190.23	315.14	0.7282	2.84862e-124	2.13902e-123
SUN2	10203	10365	1145	1095	214.72	205.3	47.55	46.33	210.01	46.94	-2.1616	3.13168e-124	2.34995e-123
STON1	5067	5153	302	268	106.63	102.07	12.54	11.34	104.35	11.94	-3.1276	3.32981e-124	2.4969e-123
COL9A3	34247	35265	24817	23456	720.71	698.5	1030.63	992.43	709.605	1011.53	0.5115	6.4728e-124	4.85036e-123
PIK3CA	3001	3648	53	55	63.15	72.26	2.2	2.33	67.705	2.265	-4.9017	6.50976e-124	4.87469e-123
ABCG2	843	885	1663	1723	17.74	17.53	69.06	72.9	17.635	70.98	2.009	7.59037e-124	5.67996e-123
SEMA6A	2804	2915	3327	3299	59.01	57.74	138.17	139.58	58.375	138.875	1.2504	8.67302e-124	6.48565e-123
PRKAR1A	16444	18621	13333	13022	346.06	368.83	553.71	550.97	357.445	552.34	0.6278	9.05766e-124	6.76862e-123
GAS7	4313	4522	4376	4380	90.77	89.57	181.73	185.32	90.17	183.525	1.0253	9.15309e-124	6.83523e-123
PABPC1	31412	33207	21548	20806	661.05	657.74	894.87	880.31	659.395	887.59	0.4288	9.35524e-124	6.98139e-123
ACO2	25834	26587	18402	17776	543.66	526.61	764.22	752.11	535.135	758.165	0.5026	1.03307e-123	7.70401e-123
RAB31	3484	3858	125	125	73.32	76.42	5.19	5.29	74.87	5.24	-3.8367	1.67389e-123	1.24743e-122
PECAM1	4632	5448	272	264	97.48	107.91	11.3	11.17	102.695	11.235	-3.1923	1.71453e-123	1.27684e-122
CRELD1	6431	6575	453	506	135.34	130.23	18.81	21.41	132.785	20.11	-2.7231	2.39499e-123	1.78237e-122
CPLX2	3830	3908	150	147	80.6	77.41	6.23	6.22	79.005	6.225	-3.6658	2.70865e-123	2.01442e-122
IRF2BP2	5801	5949	5954	5537	122.08	117.83	247.26	234.27	119.955	240.765	1.0051	3.15153e-123	2.34218e-122
SLC16A13	26	24	709	654	0.55	0.48	29.44	27.67	0.515	28.555	5.793	3.22092e-123	2.39212e-122
SMIM12	4683	4651	242	238	98.55	92.12	10.05	10.07	95.335	10.06	-3.2444	6.77129e-123	5.02547e-122
PDIK1L	5446	5887	380	325	114.61	116.61	15.78	13.75	115.61	14.765	-2.969	1.304e-122	9.67131e-122
GPS1	3165	3701	3933	4000	66.61	73.31	163.33	169.24	69.96	166.285	1.2491	1.48666e-122	1.10185e-121
ALDH1A1	100	100	725	755	2.1	1.98	30.11	31.94	2.04	31.025	3.9268	1.7836e-122	1.32103e-121
OLFML2B	4626	4957	247	276	97.35	98.18	10.26	11.68	97.765	10.97	-3.1558	2.20443e-122	1.63161e-121
PSPC1	3717	3894	4375	4037	78.22	77.13	181.69	170.81	77.675	176.25	1.1821	2.35616e-122	1.74272e-121
SC5D	5656	6244	326	397	119.03	123.68	13.54	16.8	121.355	15.17	-2.9999	3.29562e-122	2.43593e-121
SCRN3	2373	2448	2988	3228	49.94	48.49	124.09	136.58	49.215	130.335	1.4051	3.83114e-122	2.82983e-121
MAP4K5	2557	2679	3094	3273	53.81	53.06	128.49	138.48	53.435	133.485	1.3208	4.48992e-122	3.31418e-121
PCDH10	305	333	1226	1064	6.42	6.6	50.91	45.02	6.51	47.965	2.8813	4.56588e-122	3.36796e-121
CTNND2	3914	4335	173	188	82.37	85.86	7.18	7.95	84.115	7.565	-3.475	7.2805e-122	5.36671e-121
GFRA1	1112	1332	2138	2122	23.4	26.38	88.79	89.78	24.89	89.285	1.8429	1.01543e-121	7.48003e-121
MINPP1	5158	5461	340	294	108.55	108.17	14.12	12.44	108.36	13.28	-3.0285	1.08526e-121	7.98897e-121
CYGB	15745	16392	2131	1896	331.35	324.68	88.5	80.22	328.015	84.36	-1.9591	1.37909e-121	1.01451e-120
NAGPA	3164	3514	86	67	66.58	69.6	3.57	2.83	68.09	3.2	-4.4113	1.40711e-121	1.03442e-120
ELFN1	6242	6513	427	336	131.36	129	17.73	14.22	130.18	15.975	-3.0266	1.58617e-121	1.16527e-120
SSBP2	2091	2116	3237	2872	44	41.91	134.43	121.52	42.955	127.975	1.575	2.0994e-121	1.54126e-120
UBP1	4910	5647	16	8	103.33	111.85	0.66	0.34	107.59	0.5	-7.7494	2.47234e-121	1.81383e-120
CENPU	98	102	730	729	2.06	2.02	30.32	30.84	2.04	30.58	3.9059	2.68299e-121	1.96704e-120
WNT5B	1840	1685	2792	2798	38.72	33.38	115.95	118.38	36.05	117.165	1.7005	2.95531e-121	2.16523e-120
BACE2	6344	7251	539	550	133.51	143.62	22.38	23.27	138.565	22.825	-2.6019	3.70047e-121	2.70935e-120
PTPRF	26269	28284	4766	4542	552.82	560.23	197.93	192.17	556.525	195.05	-1.5126	4.00745e-121	2.93213e-120
TRAPPC8	2927	3340	3588	3586	61.6	66.16	149.01	151.73	63.88	150.37	1.2351	6.33463e-121	4.63174e-120
IL6ST	8668	9368	945	980	182.41	185.55	39.25	41.46	183.98	40.355	-2.1887	7.89142e-121	5.76616e-120
MBNL1	5818	6357	432	470	122.44	125.91	17.94	19.89	124.175	18.915	-2.7148	9.34306e-121	6.82225e-120
SLIT2	3410	3656	3703	3846	71.76	72.42	153.78	162.73	72.09	158.255	1.1344	1.00758e-120	7.35237e-120
SPINK2	42	82	9459	9889	0.88	1.62	392.82	418.41	1.25	405.615	8.342	1.07578e-120	7.84474e-120
CLDN8	5543	6165	5437	5331	116.65	122.11	225.79	225.56	119.38	225.675	0.9187	1.11199e-120	8.10333e-120
MVP	10524	11107	9152	8559	221.47	220	380.07	362.14	220.735	371.105	0.7495	1.33729e-120	9.73864e-120
SGK1	9158	10088	7875	7651	192.73	199.82	327.04	323.72	196.275	325.38	0.7292	2.3801e-120	1.73211e-119
SRGAP2	6711	6882	568	582	141.23	136.31	23.59	24.62	138.77	24.105	-2.5253	2.87662e-120	2.09205e-119
MDGA2	2943	3127	42	48	61.93	61.94	1.74	2.03	61.935	1.885	-5.0381	2.91498e-120	2.11853e-119
IER3	2966	3176	40	32	62.42	62.91	1.66	1.35	62.665	1.505	-5.3798	3.14326e-120	2.28291e-119
EDIL3	3751	4177	156	121	78.94	82.73	6.48	5.12	80.835	5.8	-3.8009	3.38666e-120	2.45805e-119
ENPP2	3440	3609	3705	3752	72.39	71.48	153.87	158.75	71.935	156.31	1.1196	3.45221e-120	2.50395e-119
SULT1E1	3552	3416	81	53	74.75	67.66	3.36	2.24	71.205	2.8	-4.6685	4.16443e-120	3.01851e-119
TLE1	1934	2072	2589	2682	40.7	41.04	107.52	113.48	40.87	110.5	1.4349	7.36829e-120	5.33722e-119
AIP	2508	2469	3166	3474	52.78	48.9	131.48	146.99	50.84	139.235	1.4535	1.01423e-119	7.34164e-119
DCTN3	4135	4623	5519	4812	87.02	91.57	229.2	203.6	89.295	216.4	1.277	1.1013e-119	7.96665e-119
CALN1	3244	3417	19	28	68.27	67.68	0.79	1.18	67.975	0.985	-6.1087	1.14103e-119	8.24851e-119
HSP90B1	39591	41815	8014	7931	833.17	828.24	332.81	335.56	830.705	334.185	-1.3137	1.16819e-119	8.43929e-119
LCP1	3573	3982	140	110	75.19	78.87	5.81	4.65	77.03	5.23	-3.8805	2.3763e-119	1.71555e-118
UNKL	3304	3125	39	28	69.53	61.9	1.62	1.18	65.715	1.4	-5.5527	3.06153e-119	2.20878e-118
TATDN3	4284	4799	209	156	90.15	95.05	8.68	6.6	92.6	7.64	-3.5994	6.32617e-119	4.56106e-118
SMG5	4120	4247	4475	4218	86.7	84.12	185.84	178.47	85.41	182.155	1.0927	6.37573e-119	4.59374e-118
SSNA1	203	240	1034	913	4.27	4.75	42.94	38.63	4.51	40.785	3.1768	7.42615e-119	5.34703e-118
ARFGAP3	2609	2689	3109	3116	54.91	53.26	129.11	131.84	54.085	130.475	1.2705	8.59142e-119	6.18195e-118
SOX11	433	429	1233	1189	9.11	8.5	51.21	50.31	8.805	50.76	2.5273	1.15168e-118	8.28143e-118
FOXC1	1287	1099	2475	2389	27.08	21.77	102.78	101.08	24.425	101.93	2.0611	1.289e-118	9.26269e-118
MED15	3105	3728	4572	4142	65.34	73.84	189.87	175.25	69.59	182.56	1.3914	1.4249e-118	1.02326e-117
SLC9A8	7194	7720	620	513	151.39	152.91	25.75	21.71	152.15	23.73	-2.6807	1.48215e-118	1.06366e-117
TCF4	830	1000	1783	1958	17.47	19.81	74.05	82.84	18.64	78.445	2.0733	1.48844e-118	1.06747e-117
ESF1	1185	1059	2156	2172	24.94	20.98	89.54	91.9	22.96	90.72	1.9823	1.69624e-118	1.2157e-117
KIRREL3	3384	3446	106	108	71.21	68.26	4.4	4.57	69.735	4.485	-3.9587	1.82708e-118	1.3086e-117
SLC25A3	21564	23422	15066	14893	453.8	463.92	625.68	630.13	458.86	627.905	0.4525	3.00029e-118	2.14747e-117
TSC2	6313	6361	6601	6002	132.85	125.99	274.13	253.95	129.42	264.04	1.0287	8.68109e-118	6.20944e-117
PCGF5	4116	4853	179	214	86.62	96.12	7.43	9.05	91.37	8.24	-3.471	9.97342e-118	7.12912e-117
SEPTIN8	9285	9894	1070	1111	195.4	195.97	44.44	47.01	195.685	45.725	-2.0975	1.20646e-117	8.61824e-117
GPN1	1502	1602	2299	2215	31.61	31.73	95.48	93.72	31.67	94.6	1.5787	1.375e-117	9.81575e-117
RNF130	10227	10965	1295	1230	215.22	217.19	53.78	52.04	216.205	52.91	-2.0308	1.5753e-117	1.12382e-116
ARPC2	9346	9978	7636	7481	196.68	197.64	317.12	316.52	197.16	316.82	0.6843	1.88573e-117	1.3444e-116
EEPD1	1495	1433	2293	2315	31.46	28.38	95.23	97.95	29.92	96.59	1.6908	1.98957e-117	1.4175e-116
ATXN1L	7453	7893	729	653	156.84	156.34	30.27	27.63	156.59	28.95	-2.4354	2.07851e-117	1.4799e-116
CCAR1	4251	4693	4365	4609	89.46	92.96	181.27	195.01	91.21	188.14	1.0445	2.18647e-117	1.55575e-116
ABCG1	3023	3361	23	26	63.62	66.57	0.96	1.1	65.095	1.03	-5.9818	2.35453e-117	1.67423e-116
FBXO4	226	277	968	1000	4.76	5.49	40.2	42.31	5.125	41.255	3.0089	2.54197e-117	1.80633e-116
TES	4076	4504	223	215	85.78	89.21	9.26	9.1	87.495	9.18	-3.2526	2.67977e-117	1.90301e-116
TOX2	772	897	1649	1651	16.25	17.77	68.48	69.85	17.01	69.165	2.0237	3.33142e-117	2.36422e-116
UBL5	3995	4061	13	17	84.07	80.44	0.54	0.72	82.255	0.63	-7.0286	3.69999e-117	2.62407e-116
SPECC1L	14375	15397	1969	2120	302.52	304.97	81.77	89.7	303.745	85.735	-1.8249	4.04083e-117	2.86392e-116
ANXA2	14447	15699	10894	10670	304.03	310.95	452.42	451.45	307.49	451.935	0.5556	5.3475e-117	3.78755e-116
RCN2	10708	12232	1326	1371	225.34	242.28	55.07	58.01	233.81	56.54	-2.048	6.89406e-117	4.87977e-116
SLC22A23	6272	6708	541	562	131.99	132.87	22.47	23.78	132.43	23.125	-2.5177	8.74991e-117	6.18935e-116
MCRIP1	13205	14110	1911	1930	277.89	279.48	79.36	81.66	278.685	80.51	-1.7914	1.14483e-116	8.09281e-116
KMT2A	7862	8129	785	710	165.45	161.01	32.6	30.04	163.23	31.32	-2.3818	1.82225e-116	1.28731e-115
PSME3	6399	7042	581	592	134.66	139.48	24.13	25.05	137.07	24.59	-2.4788	2.27687e-116	1.60743e-115
WRN	1466	1504	2169	2301	30.85	29.79	90.08	97.36	30.32	93.72	1.6281	2.327e-116	1.64175e-115
GOLGB1	9401	9193	939	950	197.84	182.09	39	40.19	189.965	39.595	-2.2623	2.43519e-116	1.71697e-115
RPL27	35690	37622	23446	22778	751.08	745.19	973.69	963.75	748.135	968.72	0.3728	2.64971e-116	1.86701e-115
SERHL	3564	3868	106	140	75	76.61	4.4	5.92	75.805	5.16	-3.8769	2.74466e-116	1.93265e-115
PCNX2	4453	4750	264	227	93.71	94.08	10.96	9.6	93.895	10.28	-3.1912	2.95116e-116	2.07671e-115
MUC1	8	15	868	871	0.17	0.3	36.05	36.85	0.235	36.45	7.2771	2.96217e-116	2.08311e-115
WWTR1	5984	6332	470	399	125.93	125.42	19.52	16.88	125.675	18.2	-2.7877	3.30856e-116	2.3252e-115
HHATL	52656	56013	82	49	1108.12	1109.46	3.41	2.07	1108.79	2.74	-8.6606	6.69719e-116	4.70363e-115
DDHD2	1513	1617	2216	2249	31.84	32.03	92.03	95.16	31.935	93.595	1.5513	7.24448e-116	5.08472e-115
DICER1	3018	3384	61	82	63.51	67.03	2.53	3.47	65.27	3	-4.4434	8.86682e-116	6.21938e-115
CTR9	5141	5527	4812	4938	108.19	109.47	199.84	208.93	108.83	204.385	0.9092	9.74682e-116	6.83222e-115
ATG2A	3504	3609	3701	3753	73.74	71.48	153.7	158.79	72.61	156.245	1.1056	1.05841e-115	7.41433e-115
TPM4	1706	1670	2427	2440	35.9	33.08	100.79	103.24	34.49	102.015	1.5645	1.08563e-115	7.6001e-115
ANK3	13672	14561	10582	10149	287.72	288.41	439.46	429.41	288.065	434.435	0.5927	1.12339e-115	7.85942e-115
MAPKAPK2	5268	5349	366	359	110.86	105.95	15.2	15.19	108.405	15.195	-2.8348	1.26069e-115	8.81424e-115
FAR1	4175	5309	5673	6032	87.86	105.16	235.59	255.22	96.51	245.405	1.3464	1.33225e-115	9.30858e-115
DSG2	11069	12082	1376	1475	232.94	239.31	57.14	62.41	236.125	59.775	-1.9819	1.51111e-115	1.05516e-114
VPS45	7135	7430	6073	6116	150.15	147.17	252.21	258.77	148.66	255.49	0.7813	1.65367e-115	1.15395e-114
RBBP6	3999	4503	4826	4397	84.16	89.19	200.42	186.04	86.675	193.23	1.1566	2.01687e-115	1.4065e-114
RAB11FIP2	5262	6177	348	277	110.74	122.35	14.45	11.72	116.545	13.085	-3.1549	2.28366e-115	1.59152e-114
MBTD1	3168	3283	97	88	66.67	65.03	4.03	3.72	65.85	3.875	-4.0869	3.22347e-115	2.24505e-114
CDH23	11064	11237	1300	1371	232.84	222.57	53.99	58.01	227.705	56	-2.0237	3.876e-115	2.6978e-114
ARPC5	8913	8894	931	921	187.57	176.17	38.66	38.97	181.87	38.815	-2.2282	4.30661e-115	2.99559e-114
CASP2	1208	1355	2009	2014	25.42	26.84	83.43	85.21	26.13	84.32	1.6902	8.07111e-115	5.61051e-114
LDAH	4594	4852	294	289	96.68	96.1	12.21	12.23	96.39	12.22	-2.9796	8.8043e-115	6.11626e-114
NFKBIA	3160	3268	3586	3445	66.5	64.73	148.92	145.76	65.615	147.34	1.1671	9.26425e-115	6.43167e-114
CTTNBP2	2872	3173	3482	3320	60.44	62.85	144.6	140.47	61.645	142.535	1.2093	1.14603e-114	7.95115e-114
CENPJ	54	57	601	714	1.14	1.13	24.96	30.21	1.135	27.585	4.6031	1.58971e-114	1.10224e-113
GLS2	6617	7214	8	9	139.25	142.89	0.33	0.38	141.07	0.355	-8.6344	2.12298e-114	1.47105e-113
MOXD1	4155	4505	7	19	87.44	89.23	0.29	0.8	88.335	0.545	-7.3406	2.29374e-114	1.58836e-113
BMERB1	6529	7282	8	9	137.4	144.24	0.33	0.38	140.82	0.355	-8.6318	3.76462e-114	2.60524e-113
JMY	4228	4950	211	245	88.98	98.05	8.76	10.37	93.515	9.565	-3.2894	4.49445e-114	3.10833e-113
P3H3	2770	2897	3301	3155	58.29	57.38	137.09	133.49	57.835	135.29	1.226	4.73736e-114	3.27424e-113
SLC19A1	5729	6000	267	361	120.56	118.84	11.09	15.27	119.7	13.18	-3.183	5.53058e-114	3.82004e-113
TRIO	9401	9762	1114	1116	197.84	193.36	46.26	47.22	195.6	46.74	-2.0652	6.24812e-114	4.31291e-113
BAK1	3509	3781	124	149	73.85	74.89	5.15	6.3	74.37	5.725	-3.6994	6.46692e-114	4.46111e-113
FGF8	63	94	764	684	1.33	1.86	31.73	28.94	1.595	30.335	4.2494	7.14179e-114	4.92353e-113
MARCKS	3175	2904	3880	4114	66.82	57.52	161.13	174.07	62.17	167.6	1.4307	1.31452e-113	9.05651e-113
KERA	511	622	1366	1393	10.75	12.32	56.73	58.94	11.535	57.835	2.3259	1.35337e-113	9.31823e-113
MICALL1	7932	8522	877	828	166.93	168.8	36.42	35.03	167.865	35.725	-2.2323	1.49558e-113	1.02909e-112
EDC3	3894	3989	163	187	81.95	79.01	6.77	7.91	80.48	7.34	-3.4548	1.55269e-113	1.06771e-112
TNRC6A	11080	11173	1346	1369	233.17	221.31	55.9	57.92	227.24	56.91	-1.9975	1.57626e-113	1.08323e-112
NFKBIE	625	723	1585	1439	13.15	14.32	65.82	60.88	13.735	63.35	2.2055	1.86565e-113	1.28129e-112
DEF6	2914	3016	32	50	61.32	59.74	1.33	2.12	60.53	1.725	-5.133	2.97345e-113	2.04081e-112
DENND1A	4827	4968	218	280	101.58	98.4	9.05	11.85	99.99	10.45	-3.2583	3.00457e-113	2.06087e-112
MPPED2	1496	1714	2283	2427	31.48	33.95	94.81	102.69	32.715	98.75	1.5938	3.05637e-113	2.09508e-112
FABP3	5298	5429	375	390	111.49	107.53	15.57	16.5	109.51	16.035	-2.7718	3.82772e-113	2.62217e-112
HSPB8	2988	2965	25	32	62.88	58.73	1.04	1.35	60.805	1.195	-5.6691	6.38885e-113	4.37391e-112
DHX32	15	18	672	673	0.32	0.36	27.91	28.47	0.34	28.19	6.3735	6.49656e-113	4.44485e-112
RTN1	17994	18640	2902	2923	378.68	369.21	120.52	123.67	373.945	122.095	-1.6148	7.59024e-113	5.18985e-112
TEAD1	3353	3597	126	98	70.56	71.25	5.23	4.15	70.905	4.69	-3.9182	7.69113e-113	5.25553e-112
UBE3B	5026	5476	261	177	105.77	108.46	10.84	7.49	107.115	9.165	-3.5469	7.84718e-113	5.35879e-112
MEAF6	5018	5447	376	350	105.6	107.89	15.61	14.81	106.745	15.21	-2.8111	8.11055e-113	5.53516e-112
ARHGEF1	3339	3547	4188	3745	70.27	70.26	173.92	158.45	70.265	166.185	1.2419	8.83107e-113	6.0231e-112
GJA1	8468	9447	941	990	178.21	187.12	39.08	41.89	182.665	40.485	-2.1737	8.93619e-113	6.09097e-112
CCT7	10784	10889	8684	8453	226.94	215.68	360.64	357.65	221.31	359.145	0.6985	9.32e-113	6.34859e-112
IRX1	2209	2083	2906	2943	46.49	41.26	120.68	124.52	43.875	122.6	1.4825	1.08879e-112	7.41196e-112
BTG2	14323	15878	2154	2215	301.42	314.5	89.45	93.72	307.96	91.585	-1.7496	1.46571e-112	9.97161e-112
GOLGA4	5510	5887	436	453	115.96	116.61	18.11	19.17	116.285	18.64	-2.6412	1.50559e-112	1.02365e-111
KMT2C	19362	20983	3159	2889	407.46	415.61	131.19	122.23	411.535	126.71	-1.6995	1.67809e-112	1.14022e-111
CYP26A1	211	249	907	907	4.44	4.93	37.67	38.38	4.685	38.025	3.0208	2.11733e-112	1.43777e-111
ZDHHC15	3327	3486	116	87	70.02	69.05	4.82	3.68	69.535	4.25	-4.0322	2.20906e-112	1.49913e-111
EFHD1	24444	25911	16734	17793	514.41	513.22	694.95	752.83	513.815	723.89	0.4945	2.38511e-112	1.61758e-111
ANKRD42	117	136	735	739	2.46	2.69	30.52	31.27	2.575	30.895	3.5847	3.14021e-112	2.12837e-111
PPARA	6442	6833	577	505	135.57	135.34	23.96	21.37	135.455	22.665	-2.5793	3.80217e-112	2.57542e-111
TUSC3	6234	6368	526	539	131.19	126.13	21.84	22.81	128.66	22.325	-2.5268	4.39798e-112	2.97713e-111
TEKT3	28	27	572	651	0.59	0.53	23.75	27.54	0.56	25.645	5.5171	4.5233e-112	3.06006e-111
OLFM4	24	39	619	604	0.51	0.77	25.71	25.56	0.64	25.635	5.3239	4.82186e-112	3.26001e-111
ANKRD13C	6644	6959	561	621	139.82	137.84	23.3	26.27	138.83	24.785	-2.4858	5.11274e-112	3.45452e-111
RTEL1	564	507	1389	1367	11.87	10.04	57.68	57.84	10.955	57.76	2.3985	5.84541e-112	3.94711e-111
RBP1	879	927	1669	1612	18.5	18.36	69.31	68.2	18.43	68.755	1.8994	6.24326e-112	4.21313e-111
PLIN3	94	100	730	660	1.98	1.98	30.32	27.92	1.98	29.12	3.8784	8.42449e-112	5.68156e-111
EFL1	4108	4241	214	176	86.45	84	8.89	7.45	85.225	8.17	-3.3829	9.42519e-112	6.3525e-111
STIM1	7409	8227	6788	6467	155.92	162.95	281.9	273.62	159.435	277.76	0.8009	1.0217e-111	6.88188e-111
SAAL1	2194	2378	2725	2779	46.17	47.1	113.17	117.58	46.635	115.375	1.3068	1.02645e-111	6.9096e-111
SLTM	2919	3137	3294	3253	61.43	62.14	136.8	137.64	61.785	137.22	1.1512	1.08723e-111	7.3142e-111
PI4KB	8710	8816	7427	7134	183.3	174.62	308.44	301.84	178.96	305.14	0.7698	1.38069e-111	9.28269e-111
AMPH	3364	3934	4006	3938	70.79	77.92	166.37	166.62	74.355	166.495	1.163	1.54592e-111	1.03871e-110
NUFIP2	4112	3332	80	69	86.54	66	3.32	2.92	76.27	3.12	-4.6115	1.79488e-111	1.20525e-110
HES6	108	95	723	696	2.27	1.88	30.03	29.45	2.075	29.74	3.8412	1.91595e-111	1.28574e-110
OLA1	2276	2438	2943	2779	47.9	48.29	122.22	117.58	48.095	119.9	1.3179	2.98459e-111	2.00165e-110
ZHX3	15780	16147	1897	2159	332.08	319.83	78.78	91.35	325.955	85.065	-1.938	3.54933e-111	2.37893e-110
FSTL3	1914	1834	2589	2787	40.28	36.33	107.52	117.92	38.305	112.72	1.5571	4.52171e-111	3.02879e-110
MEGF10	3125	3571	3609	3628	65.76	70.73	149.88	153.5	68.245	151.69	1.1523	5.2623e-111	3.52269e-110
SOX4	923	897	1671	1711	19.42	17.77	69.4	72.39	18.595	70.895	1.9308	7.6737e-111	5.13377e-110
HIPK3	3376	3783	147	126	71.05	74.93	6.1	5.33	72.99	5.715	-3.6749	7.68022e-111	5.13497e-110
CYP17A1	18	29	620	602	0.38	0.57	25.75	25.47	0.475	25.61	5.7526	9.94456e-111	6.6448e-110
VASN	5222	5562	4815	4781	109.89	110.17	199.96	202.29	110.03	201.125	0.8702	1.68865e-110	1.12764e-109
IRX2	1812	1763	2468	2491	38.13	34.92	102.49	105.4	36.525	103.945	1.5089	1.90083e-110	1.26855e-109
VSTM2L	2687	2865	3053	3103	56.55	56.75	126.79	131.29	56.65	129.04	1.1877	4.35027e-110	2.90143e-109
SRCIN1	6740	7402	6007	5854	141.84	146.61	249.47	247.69	144.225	248.58	0.7854	5.10826e-110	3.40488e-109
LINGO2	13	6	896	965	0.27	0.12	37.21	40.83	0.195	39.02	7.6446	5.28727e-110	3.52204e-109
DCLRE1A	380	427	1124	1099	8	8.46	46.68	46.5	8.23	46.59	2.5011	5.4766e-110	3.64592e-109
CTPS2	1173	1306	1903	2009	24.69	25.87	79.03	85	25.28	82.015	1.6979	6.64143e-110	4.41867e-109
B3GNT2	4378	4829	292	280	92.13	95.65	12.13	11.85	93.89	11.99	-2.9691	7.80427e-110	5.18915e-109
ANKRD13A	4738	4811	228	284	99.71	95.29	9.47	12.02	97.5	10.745	-3.1817	8.6978e-110	5.77972e-109
SMYD2	1308	1493	2195	2071	27.53	29.57	91.16	87.63	28.55	89.395	1.6467	1.01387e-109	6.73308e-109
ENTPD8	1975	1892	2715	2614	41.56	37.48	112.75	110.6	39.52	111.675	1.4987	1.56389e-109	1.03794e-108
PREB	2893	2978	3299	3189	60.88	58.99	137	134.93	59.935	135.965	1.1818	1.57447e-109	1.04432e-108
ACOT7	8074	8399	751	852	169.91	166.36	31.19	36.05	168.135	33.62	-2.3222	1.60913e-109	1.06666e-108
PFKFB4	9960	10554	1300	1261	209.6	209.05	53.99	53.35	209.325	53.67	-1.9636	2.03549e-109	1.34846e-108
MMP2	16265	17886	12003	12730	342.29	354.27	498.47	538.61	348.28	518.54	0.5742	2.41044e-109	1.59589e-108
SNU13	1758	1858	2800	2457	37	36.8	116.28	103.96	36.9	110.12	1.5774	3.96524e-109	2.62368e-108
PITPNM3	3491	3763	12	17	73.47	74.53	0.5	0.72	74	0.61	-6.9226	4.925e-109	3.25674e-108
PDLIM1	1042	1162	1783	1825	21.93	23.02	74.05	77.22	22.475	75.635	1.7507	5.15449e-109	3.40642e-108
GATAD2A	5516	5963	473	465	116.08	118.11	19.64	19.67	117.095	19.655	-2.5747	8.43286e-109	5.56958e-108
DVL2	3226	3044	3720	3696	67.89	60.29	154.49	156.38	64.09	155.435	1.2781	9.50748e-109	6.27552e-108
TLCD4	2193	2581	3190	2967	46.15	51.12	132.48	125.54	48.635	129.01	1.4074	9.67413e-109	6.38163e-108
CDO1	9794	10545	1287	1251	206.11	208.87	53.45	52.93	207.49	53.19	-1.9638	1.00572e-108	6.63033e-108
CACYBP	3717	4012	196	175	78.22	79.47	8.14	7.4	78.845	7.77	-3.343	1.10897e-108	7.30657e-108
ZMYND11	9404	10549	1159	1203	197.9	208.95	48.13	50.9	203.425	49.515	-2.0386	1.54066e-108	1.01446e-107
MPRIP	20935	21093	14824	14514	440.57	417.79	615.63	614.09	429.18	614.86	0.5187	2.78796e-108	1.83464e-107
MYH11	2039	2158	2804	2583	42.91	42.74	116.45	109.29	42.825	112.87	1.3981	3.6536e-108	2.40283e-107
MKRN2	2423	2810	3249	3073	50.99	55.66	134.93	130.02	53.325	132.475	1.3128	4.36385e-108	2.8682e-107
MAP1LC3A	5967	6839	5794	5667	125.57	135.46	240.62	239.77	130.515	240.195	0.88	4.44883e-108	2.92228e-107
GPD2	6521	6758	380	495	137.23	133.86	15.78	20.94	135.545	18.36	-2.8841	4.46547e-108	2.93144e-107
REXO4	913	966	1701	1613	19.21	19.13	70.64	68.25	19.17	69.445	1.857	4.80515e-108	3.15252e-107
RASSF9	2647	2915	42	54	55.7	57.74	1.74	2.28	56.72	2.01	-4.8186	4.89819e-108	3.21163e-107
CALM1	65169	70262	13349	14179	1371.45	1391.69	554.37	599.92	1381.57	577.145	-1.2593	5.62268e-108	3.68443e-107
NCOA7	3951	4487	236	227	83.15	88.87	9.8	9.6	86.01	9.7	-3.1484	5.74676e-108	3.76347e-107
RGS9	3973	4297	218	175	83.61	85.11	9.05	7.4	84.36	8.225	-3.3585	7.34516e-108	4.80734e-107
PHACTR2	5738	6362	488	418	120.75	126.01	20.27	17.69	123.38	18.98	-2.7006	7.87272e-108	5.14952e-107
SPPL2A	9257	10557	1155	1152	194.81	209.1	47.97	48.74	201.955	48.355	-2.0623	1.08167e-107	7.07088e-107
TGFBI	7144	7667	6065	5948	150.34	151.86	251.87	251.66	151.1	251.765	0.7366	1.41148e-107	9.22135e-107
PTGES2	2776	2951	3344	3119	58.42	58.45	138.87	131.97	58.435	135.42	1.2125	1.47331e-107	9.61947e-107
PIK3CG	2655	2822	52	55	55.87	55.9	2.16	2.33	55.885	2.245	-4.6377	2.26746e-107	1.47957e-106
RGS19	760	685	1627	1546	15.99	13.57	67.57	65.41	14.78	66.49	2.1695	2.94852e-107	1.92283e-106
LSM14A	6509	7141	588	648	136.98	141.44	24.42	27.42	139.21	25.92	-2.4251	3.51204e-107	2.28894e-106
NEB	5684	6084	10	7	119.62	120.51	0.42	0.3	120.065	0.36	-8.3816	3.79144e-107	2.46955e-106
POFUT1	2227	2254	2691	2739	46.87	44.65	111.75	115.89	45.76	113.82	1.3146	4.20874e-107	2.73972e-106
EPHA7	4440	4873	4283	4375	93.44	96.52	177.87	185.11	94.98	181.49	0.9342	4.9158e-107	3.19807e-106
ZC3H7A	4743	4911	298	236	99.81	97.27	12.38	9.99	98.54	11.185	-3.1391	5.55472e-107	3.61157e-106
AGPAT5	2939	3067	76	92	61.85	60.75	3.16	3.89	61.3	3.525	-4.1202	1.28162e-106	8.32787e-106
SCPEP1	4662	5041	4401	4403	98.11	99.85	182.77	186.29	98.98	184.53	0.8986	1.37849e-106	8.95194e-106
GAL3ST1	10830	10688	1053	1209	227.91	211.7	43.73	51.15	219.805	47.44	-2.212	1.62979e-106	1.05776e-105
CMAS	1585	1686	2416	2209	33.36	33.39	100.33	93.46	33.375	96.895	1.5377	1.8811e-106	1.22013e-105
TMEM47	9432	10344	1157	1228	198.49	204.89	48.05	51.96	201.69	50.005	-2.012	2.29817e-106	1.48976e-105
PLPP2	7096	7405	5861	6022	149.33	146.67	243.4	254.79	148	249.095	0.7511	2.56616e-106	1.66249e-105
LARP4	4445	4608	291	293	93.54	91.27	12.08	12.4	92.405	12.24	-2.9164	3.10375e-106	2.00957e-105
VWA2	14305	14830	2120	1956	301.04	293.74	88.04	82.76	297.39	85.4	-1.8	3.53616e-106	2.28818e-105
PROS1	9351	9864	1156	1197	196.79	195.38	48.01	50.65	196.085	49.33	-1.9909	3.58751e-106	2.32002e-105
METTL24	480	456	1173	1271	10.1	9.03	48.71	53.78	9.565	51.245	2.4216	3.78808e-106	2.44827e-105
GALNT1	7554	7806	8	6	158.97	154.62	0.33	0.25	156.795	0.29	-9.0786	4.23726e-106	2.73696e-105
NDUFB1	4781	4705	274	306	100.61	93.19	11.38	12.95	96.9	12.165	-2.9938	6.91626e-106	4.46473e-105
DPY19L4	6606	7457	609	507	139.02	147.7	25.29	21.45	143.36	23.37	-2.6169	7.2419e-106	4.67217e-105
RRM2B	2834	2978	24	18	59.64	58.99	1	0.76	59.315	0.88	-6.0747	9.10394e-106	5.86999e-105
IPMK	3291	3395	137	121	69.26	67.25	5.69	5.12	68.255	5.405	-3.6586	1.24161e-105	8.00081e-105
PITRM1	1912	2047	2426	2502	40.24	40.55	100.75	105.86	40.395	103.305	1.3547	1.56597e-105	1.0085e-104
SGCE	4916	5261	357	386	103.45	104.21	14.83	16.33	103.83	15.58	-2.7365	1.79948e-105	1.1582e-104
SLC1A6	2663	2928	20	30	56.04	58	0.83	1.27	57.02	1.05	-5.763	2.23588e-105	1.43822e-104
ABCC3	1467	1605	2130	2106	30.87	31.79	88.46	89.11	31.33	88.785	1.5028	2.47435e-105	1.59068e-104
RPS6KA1	6638	7277	690	687	139.69	144.14	28.66	29.07	141.915	28.865	-2.2976	2.48912e-105	1.59922e-104
INPP4A	5058	6072	362	394	106.44	120.27	15.03	16.67	113.355	15.85	-2.8383	2.65266e-105	1.70329e-104
SDCBP	9005	9469	7149	6998	189.51	187.55	296.89	296.09	188.53	296.49	0.6532	2.70202e-105	1.73395e-104
CPNE3	1873	2082	2529	2450	39.42	41.24	105.03	103.66	40.33	104.345	1.3714	2.76718e-105	1.77472e-104
STYK1	3044	3473	118	121	64.06	68.79	4.9	5.12	66.425	5.01	-3.7288	2.91021e-105	1.86535e-104
CHRNB2	1317	1396	2103	1954	27.72	27.65	87.34	82.67	27.685	85.005	1.6184	3.48515e-105	2.23256e-104
LDHA	14596	14958	10466	10408	307.17	296.28	434.64	440.37	301.725	437.505	0.5361	3.53728e-105	2.26461e-104
HGS	8213	8393	6601	6856	172.84	166.24	274.13	290.08	169.54	282.105	0.7346	3.54285e-105	2.26684e-104
TMEM119	1062	1103	1721	1780	22.35	21.85	71.47	75.31	22.1	73.39	1.7315	3.65425e-105	2.33674e-104
GNS	27006	30410	4793	5070	568.33	602.34	199.05	214.51	585.335	206.78	-1.5012	4.06199e-105	2.59594e-104
MGAT5	10252	10867	1327	1197	215.75	215.25	55.11	50.65	215.5	52.88	-2.0269	4.35219e-105	2.77977e-104
WDR18	828	957	1785	1604	17.42	18.96	74.13	67.87	18.19	71	1.9647	4.54112e-105	2.89873e-104
EIF4G1	14917	15537	2354	2353	313.92	307.74	97.76	99.56	310.83	98.66	-1.6556	4.5486e-105	2.9018e-104
COX7B	5751	6153	5281	5054	121.03	121.87	219.32	213.84	121.45	216.58	0.8345	4.62261e-105	2.94729e-104
MTCP1	359	339	1023	1152	7.55	6.71	42.48	48.74	7.13	45.61	2.6774	5.79139e-105	3.69031e-104
BTRC	6012	6371	543	475	126.52	126.19	22.55	20.1	126.355	21.325	-2.5669	5.81664e-105	3.70423e-104
TAP1	5685	6008	451	502	119.64	119	18.73	21.24	119.32	19.985	-2.5778	7.27245e-105	4.62862e-104
RAB8B	4164	4755	251	277	87.63	94.18	10.42	11.72	90.905	11.07	-3.0377	7.69424e-105	4.8942e-104
AP3S2	4766	4613	295	270	100.3	91.37	12.25	11.42	95.835	11.835	-3.0175	8.4596e-105	5.37789e-104
TLCD3B	371	418	1060	1074	7.81	8.28	44.02	45.44	8.045	44.73	2.4751	1.313e-104	8.34202e-104
ANXA11	7072	7466	723	637	148.83	147.88	30.03	26.95	148.355	28.49	-2.3805	1.95272e-104	1.23992e-103
POPDC2	186	255	1026	899	3.91	5.05	42.61	38.04	4.48	40.325	3.1701	3.03375e-104	1.92521e-103
SSR3	7340	7642	798	786	154.47	151.37	33.14	33.26	152.92	33.2	-2.2035	3.57937e-104	2.27014e-103
DPH5	1204	1362	1904	1978	25.34	26.98	79.07	83.69	26.16	81.38	1.6373	3.64086e-104	2.30779e-103
TXNRD3	4086	4267	4403	4042	85.99	84.52	182.85	171.02	85.255	176.935	1.0534	4.04042e-104	2.55956e-103
ABI1	5906	6264	537	476	124.29	124.07	22.3	20.14	124.18	21.22	-2.5489	4.26635e-104	2.70111e-103
VANGL1	1805	1931	2528	2349	37.99	38.25	104.99	99.39	38.12	102.19	1.4226	4.63846e-104	2.93499e-103
SAR1B	3056	3170	16	17	64.31	62.79	0.66	0.72	63.55	0.69	-6.5252	5.87461e-104	3.715e-103
BMP7	6348	6679	8	7	133.59	132.29	0.33	0.3	132.94	0.315	-8.7212	6.33019e-104	4.00077e-103
MTA2	4300	4449	4068	4127	90.49	88.12	168.94	174.62	89.305	171.78	0.9437	6.7351e-104	4.2542e-103
USP25	3457	3686	3803	3556	72.75	73.01	157.94	150.46	72.88	154.2	1.0812	7.27978e-104	4.59557e-103
SLC1A2	2784	2776	24	22	58.59	54.98	1	0.93	56.785	0.965	-5.8788	7.57683e-104	4.78032e-103
MICAL2	2434	2794	2971	3119	51.22	55.34	123.38	131.97	53.28	127.675	1.2608	1.09927e-103	6.93139e-103
PRDM11	8869	9062	957	819	186.64	179.49	39.74	34.65	183.065	37.195	-2.2992	1.173e-103	7.39204e-103
SLC2A13	4102	4441	202	250	86.32	87.96	8.39	10.58	87.14	9.485	-3.1996	1.27375e-103	8.02227e-103
CDK19	3628	3895	197	172	76.35	77.15	8.18	7.28	76.75	7.73	-3.3116	1.38272e-103	8.70351e-103
OAZ1	25895	27311	4821	4991	544.95	540.95	200.21	211.17	542.95	205.69	-1.4003	1.50289e-103	9.45443e-103
NGFR	5981	5949	503	460	125.87	117.83	20.89	19.46	121.85	20.175	-2.5945	1.68827e-103	1.06145e-102
AGMO	198	162	926	827	4.17	3.21	38.46	34.99	3.69	36.725	3.3151	2.10261e-103	1.32119e-102
NDFIP2	11662	12418	1632	1713	245.42	245.97	67.78	72.48	245.695	70.13	-1.8088	2.10932e-103	1.32464e-102
PSME4	2894	2974	3135	3138	60.9	58.91	130.19	132.77	59.905	131.48	1.1341	2.17213e-103	1.36329e-102
CFLAR	3413	3808	175	155	71.83	75.43	7.27	6.56	73.63	6.915	-3.4125	2.60795e-103	1.63588e-102
NR1D1	486	462	1425	1198	10.23	9.15	59.18	50.69	9.69	54.935	2.5032	2.71233e-103	1.70037e-102
WIPF1	5893	6288	488	395	124.02	124.55	20.27	16.71	124.285	18.49	-2.7488	2.9597e-103	1.85438e-102
PRKCA	7090	7709	6281	5959	149.21	152.69	260.84	252.13	150.95	256.485	0.7648	2.98589e-103	1.86971e-102
PARP3	1525	1444	2326	2184	32.09	28.6	96.6	92.41	30.345	94.505	1.6389	3.04675e-103	1.90672e-102
UBALD2	828	1017	1775	1679	17.42	20.14	73.71	71.04	18.78	72.375	1.9463	4.76989e-103	2.98338e-102
RCC1L	834	758	1575	1700	17.55	15.01	65.41	71.93	16.28	68.67	2.0766	8.9165e-103	5.57371e-102
KANSL3	3313	3333	3652	3448	69.72	66.02	151.66	145.89	67.87	148.775	1.1323	9.61364e-103	6.00603e-102
ZDHHC2	1447	1492	2043	2236	30.45	29.55	84.84	94.61	30	89.725	1.5805	1.10652e-102	6.9089e-102
PAQR5	3582	3786	180	144	75.38	74.99	7.48	6.09	75.185	6.785	-3.47	1.26478e-102	7.89254e-102
YTHDC1	6462	6912	5608	5434	135.99	136.91	232.9	229.92	136.45	231.41	0.7621	1.26843e-102	7.91077e-102
ARF5	2038	2177	2493	2544	42.89	43.12	103.53	107.64	43.005	105.585	1.2958	1.35373e-102	8.43791e-102
CRIP2	14606	14993	2258	2245	307.38	296.97	93.77	94.99	302.175	94.38	-1.6788	1.53689e-102	9.57406e-102
ITGA2	3876	4291	173	221	81.57	84.99	7.18	9.35	83.28	8.265	-3.3329	1.64008e-102	1.0211e-101
AGRN	59380	60778	12219	11541	1249.62	1203.84	507.44	488.31	1226.73	497.875	-1.301	1.71176e-102	1.06512e-101
MTMR11	3568	3694	3567	3597	75.09	73.17	148.13	152.19	74.13	150.16	1.0184	2.62409e-102	1.63187e-101
CYB5R2	2885	3081	13	22	60.71	61.03	0.54	0.93	60.87	0.735	-6.3718	2.8459e-102	1.76879e-101
RBM6	2973	3052	3204	3480	62.57	60.45	133.06	147.24	61.51	140.15	1.1881	4.04671e-102	2.51368e-101
ZMAT3	4311	4853	155	229	90.72	96.12	6.44	9.69	93.42	8.065	-3.534	4.4822e-102	2.78261e-101
TMEM63C	9132	9613	1120	1178	192.18	190.41	46.51	49.84	191.295	48.175	-1.9894	4.87229e-102	3.02305e-101
RBBP7	441	457	1120	1099	9.28	9.05	46.51	46.5	9.165	46.505	2.3432	4.98382e-102	3.09048e-101
AFG3L2	5234	5437	4725	4636	110.15	107.69	196.23	196.15	108.92	196.19	0.849	5.07486e-102	3.14514e-101
LDB3	3115	3341	128	101	65.55	66.18	5.32	4.27	65.865	4.795	-3.7799	6.70787e-102	4.15482e-101
KDM3A	5364	5447	4985	4777	112.88	107.89	207.02	202.12	110.385	204.57	0.8901	8.26247e-102	5.11482e-101
SLC7A2	192	299	1074	1070	4.04	5.92	44.6	45.27	4.98	44.935	3.1736	9.17033e-102	5.67358e-101
APBB2	6291	6861	531	416	132.39	135.9	22.05	17.6	134.145	19.825	-2.7584	9.21721e-102	5.69934e-101
DIDO1	4551	4926	4290	4240	95.77	97.57	178.16	179.4	96.67	178.78	0.887	9.87781e-102	6.10434e-101
ARFIP1	4571	5023	353	331	96.19	99.49	14.66	14	97.84	14.33	-2.7714	1.08587e-101	6.70673e-101
UBR5	10205	10820	7617	7769	214.76	214.31	316.33	328.71	214.535	322.52	0.5882	1.34558e-101	8.30603e-101
BBS4	5693	6217	535	487	119.81	123.14	22.22	20.61	121.475	21.415	-2.504	1.50798e-101	9.30318e-101
SAMD4B	2803	2826	3413	3116	58.99	55.98	141.74	131.84	57.485	136.79	1.2507	2.05414e-101	1.26655e-100
TOMM40L	4021	4095	201	236	84.62	81.11	8.35	9.99	82.865	9.17	-3.1758	2.18695e-101	1.34767e-100
BHLHE40	4668	4967	4271	4317	98.24	98.38	177.37	182.65	98.31	180.01	0.8727	3.53017e-101	2.17417e-100
BASP1	5039	5329	417	415	106.04	105.55	17.32	17.56	105.795	17.44	-2.6008	4.21572e-101	2.59491e-100
DENND1B	3324	3466	153	157	69.95	68.65	6.35	6.64	69.3	6.495	-3.4155	4.37875e-101	2.69374e-100
IGDCC4	1275	1395	1937	1902	26.83	27.63	80.44	80.47	27.23	80.455	1.563	4.56438e-101	2.80634e-100
HEPHL1	13	21	635	555	0.27	0.42	26.37	23.48	0.345	24.925	6.1749	4.96971e-101	3.05382e-100
PYROXD1	557	465	1451	1339	11.72	9.21	60.26	56.65	10.465	58.455	2.4818	5.05686e-101	3.10562e-100
NDUFS3	4211	4505	4199	3996	88.62	89.23	174.38	169.07	88.925	171.725	0.9494	5.85572e-101	3.5942e-100
DPP8	2984	3060	103	78	62.8	60.61	4.28	3.3	61.705	3.79	-4.0251	7.1237e-101	4.37001e-100
RHAG	30	34	531	525	0.63	0.67	22.05	22.21	0.65	22.13	5.0894	8.54312e-101	5.23779e-100
ISM2	1746	1905	2327	2274	36.74	37.73	96.64	96.21	37.235	96.425	1.3727	1.04387e-100	6.39637e-100
NDUFA9	3628	4007	4047	3740	76.35	79.37	168.07	158.24	77.86	163.155	1.0673	1.22616e-100	7.50909e-100
SYNGR2	6928	7000	664	705	145.8	138.65	27.58	29.83	142.225	28.705	-2.3088	2.20588e-100	1.35014e-99
WASF1	1065	1152	1740	1977	22.41	22.82	72.26	83.65	22.615	77.955	1.7854	2.55153e-100	1.56082e-99
CBX3	6566	7447	704	674	138.18	147.5	29.24	28.52	142.84	28.88	-2.3063	2.57146e-100	1.57212e-99
EGLN1	15458	16744	2592	2630	325.31	331.65	107.64	111.28	328.48	109.46	-1.5854	2.79694e-100	1.70901e-99
PITPNM2	6055	6620	615	584	127.42	131.12	25.54	24.71	129.27	25.125	-2.3632	3.09766e-100	1.8917e-99
SLC31A1	2302	2454	2654	2724	48.44	48.61	110.22	115.25	48.525	112.735	1.2161	4.86087e-100	2.9668e-99
CLDN11	4799	5085	325	249	100.99	100.72	13.5	10.54	100.855	12.02	-3.0688	5.36954e-100	3.27542e-99
CAPN15	4977	5496	425	390	104.74	108.86	17.65	16.5	106.8	17.075	-2.645	5.42756e-100	3.30895e-99
MYO19	4518	4817	342	311	95.08	95.41	14.2	13.16	95.245	13.68	-2.7996	6.89385e-100	4.20053e-99
CHGA	12904	13463	1909	1984	271.56	266.66	79.28	83.94	269.11	81.61	-1.7214	9.31281e-100	5.67126e-99
XRCC6	916	1006	1577	1610	19.28	19.93	65.49	68.12	19.605	66.805	1.7687	9.43345e-100	5.7415e-99
RHOG	701	771	1366	1482	14.75	15.27	56.73	62.7	15.01	59.715	1.9922	9.56044e-100	5.81553e-99
SGPL1	8355	8801	1040	997	175.83	174.32	43.19	42.18	175.075	42.685	-2.0362	9.66881e-100	5.87816e-99
NCEH1	4371	4492	292	248	91.99	88.97	12.13	10.49	90.48	11.31	-3	9.90434e-100	6.01798e-99
TRAPPC11	2737	3011	3009	3109	57.6	59.64	124.96	131.54	58.62	128.25	1.1295	1.07498e-99	6.52804e-99
ASB1	6026	6634	588	615	126.81	131.4	24.42	26.02	129.105	25.22	-2.3559	1.10028e-99	6.67793e-99
PAICS	3502	3615	3497	3506	73.7	71.6	145.23	148.34	72.65	146.785	1.0147	1.22673e-99	7.44127e-99
EIF4E1B	7	8	904	1093	0.15	0.16	37.54	46.25	0.155	41.895	8.0784	1.6366e-99	9.92193e-99
CYTL1	4565	4919	4210	4426	96.07	97.43	174.84	187.27	96.75	181.055	0.9041	1.78351e-99	1.08065e-98
NEK4	2033	2205	2571	2469	42.78	43.67	106.77	104.46	43.225	105.615	1.2889	2.09086e-99	1.26618e-98
CPXM2	9958	10411	1262	1348	209.56	206.21	52.41	57.03	207.885	54.72	-1.9256	2.36916e-99	1.43391e-98
N4BP2	3922	4390	222	257	82.54	86.95	9.22	10.87	84.745	10.045	-3.0767	2.81131e-99	1.70057e-98
MAN1C1	2561	2540	34	26	53.9	50.31	1.41	1.1	52.105	1.255	-5.3757	3.21828e-99	1.94566e-98
TMEM200C	2544	2501	43	42	53.54	49.54	1.79	1.78	51.54	1.785	-4.8517	7.81898e-99	4.72446e-98
TAF15	5945	5960	5186	5141	125.11	118.05	215.37	217.52	121.58	216.445	0.8321	9.45556e-99	5.71015e-98
ATRN	15891	16425	2572	2414	334.42	325.33	106.81	102.14	329.875	104.475	-1.6588	1.04782e-98	6.32421e-98
LIPE	2642	2812	2882	3037	55.6	55.7	119.69	128.5	55.65	124.095	1.157	1.30521e-98	7.87334e-98
BSDC1	5667	5946	5101	4871	119.26	117.77	211.84	206.09	118.515	208.965	0.8182	1.38355e-98	8.34124e-98
LARP1	15802	16908	2710	2705	332.55	334.9	112.54	114.45	333.725	113.495	-1.556	1.65435e-98	9.96835e-98
SNN	1193	1189	1803	1814	25.11	23.55	74.88	76.75	24.33	75.815	1.6397	1.9101e-98	1.1503e-97
DNAJA1	12047	12815	1246	1511	253.52	253.83	51.75	63.93	253.675	57.84	-2.1328	2.01871e-98	1.21503e-97
MAFK	4323	4204	248	201	90.98	83.27	10.3	8.5	87.125	9.4	-3.2124	2.49811e-98	1.50274e-97
FAM221A	51	60	596	526	1.07	1.19	24.75	22.26	1.13	23.505	4.3786	2.81924e-98	1.69498e-97
ABHD17A	4796	4963	382	361	100.93	98.3	15.86	15.27	99.615	15.565	-2.6781	5.00284e-98	3.00613e-97
MAP1A	35655	37847	6778	7258	750.34	749.64	281.48	307.09	749.99	294.285	-1.3497	5.93125e-98	3.56203e-97
NIFK	2116	2492	2941	2752	44.53	49.36	122.14	116.44	46.945	119.29	1.3454	7.63722e-98	4.58402e-97
GTSF2	2687	2710	74	57	56.55	53.68	3.07	2.41	55.115	2.74	-4.3302	8.40277e-98	5.04073e-97
CDKN2AIP	3642	4054	223	195	76.64	80.3	9.26	8.25	78.47	8.755	-3.164	9.59074e-98	5.75021e-97
ARHGEF33	209	241	796	856	4.4	4.77	33.06	36.22	4.585	34.64	2.9174	1.04881e-97	6.28478e-97
SOD1	11910	12649	10321	9299	250.64	250.54	428.62	393.45	250.59	411.035	0.7139	1.11592e-97	6.68324e-97
PLEKHM3	2982	2921	90	104	62.75	57.86	3.74	4.4	60.305	4.07	-3.8892	1.44196e-97	8.63108e-97
NT5DC2	5610	5779	4981	4813	118.06	114.47	206.86	203.64	116.265	205.25	0.82	1.60429e-97	9.59744e-97
TMEM178B	256	256	834	907	5.39	5.07	34.64	38.38	5.23	36.51	2.8034	1.66307e-97	9.93934e-97
MOK	2843	3296	116	114	59.83	65.28	4.82	4.82	62.555	4.82	-3.698	1.66327e-97	9.93934e-97
CHAC1	4820	4692	335	303	101.43	92.94	13.91	12.82	97.185	13.365	-2.8623	1.70722e-97	1.01964e-96
POR	6776	7209	5536	5540	142.6	142.79	229.91	234.4	142.695	232.155	0.7022	1.93813e-97	1.15691e-96
COL1A1	42682	43077	7760	6995	898.22	853.24	322.27	295.96	875.73	309.115	-1.5023	2.03544e-97	1.21433e-96
FOXG1	846	948	1518	1531	17.8	18.78	63.04	64.78	18.29	63.91	1.805	2.12199e-97	1.26527e-96
CGREF1	256	249	1052	858	5.39	4.93	43.69	36.3	5.16	39.995	2.9544	2.30424e-97	1.37319e-96
RNF41	5215	5401	448	405	109.75	106.98	18.61	17.14	108.365	17.875	-2.5999	2.33784e-97	1.39244e-96
CSDE1	25673	27900	5137	5107	540.28	552.62	213.34	216.08	546.45	214.71	-1.3477	2.48237e-97	1.47772e-96
NDRG1	19785	21377	13255	13064	416.37	423.42	550.47	552.74	419.895	551.605	0.3936	2.60706e-97	1.55109e-96
TBC1D13	7632	7868	884	839	160.61	155.84	36.71	35.5	158.225	36.105	-2.1317	2.63491e-97	1.5668e-96
TSPAN6	14703	14886	2277	2240	309.42	294.85	94.56	94.78	302.135	94.67	-1.6742	2.85469e-97	1.69657e-96
FN3KRP	2810	3151	3174	3088	59.14	62.41	131.81	130.65	60.775	131.23	1.1105	4.45392e-97	2.64555e-96
SCUBE2	7656	8126	910	835	161.12	160.95	37.79	35.33	161.035	36.56	-2.139	4.50746e-97	2.67589e-96
VTI1A	1356	1291	1993	1976	28.54	25.57	82.77	83.61	27.055	83.19	1.6205	4.77377e-97	2.83244e-96
MEA1	4546	4449	4518	4294	95.67	88.12	187.63	181.68	91.895	184.655	1.0068	4.92221e-97	2.91892e-96
UNC5B	3114	3329	148	131	65.53	65.94	6.15	5.54	65.735	5.845	-3.4914	5.10422e-97	3.0252e-96
CWF19L2	629	637	1333	1254	13.24	12.62	55.36	53.06	12.93	54.21	2.0678	5.57313e-97	3.30131e-96
TNIK	2576	2675	2947	2810	54.21	52.98	122.39	118.89	53.595	120.64	1.1705	5.70701e-97	3.37878e-96
GHR	2516	2848	64	41	52.95	56.41	2.66	1.73	54.68	2.195	-4.6387	5.76285e-97	3.40997e-96
CHAD	33374	34327	6627	6356	702.34	679.92	275.21	268.93	691.13	272.07	-1.345	8.49795e-97	5.02564e-96
HSPG2	36509	37331	24120	23010	768.32	739.42	1001.68	973.56	753.87	987.62	0.3896	8.52951e-97	5.04156e-96
SMARCC2	6255	6512	5279	5176	131.63	128.98	219.23	219	130.305	219.115	0.7498	1.01091e-96	5.97198e-96
TXLNA	4919	5253	425	409	103.52	104.05	17.65	17.3	103.785	17.475	-2.5702	1.05048e-96	6.20236e-96
CRYAB	4038	4413	4232	3921	84.98	87.41	175.75	165.9	86.195	170.825	0.9868	2.17885e-96	1.28576e-95
BBIP1	1451	1743	2357	2203	30.54	34.52	97.88	93.21	32.53	95.545	1.5544	2.43562e-96	1.4365e-95
RMI2	2986	3085	18	10	62.84	61.11	0.75	0.42	61.975	0.585	-6.7271	2.84457e-96	1.67678e-95
CNBP	27033	27871	5032	4690	568.9	552.05	208.97	198.44	560.475	203.705	-1.4602	3.50065e-96	2.0624e-95
TNPO3	3803	4059	3829	3648	80.03	80.4	159.01	154.35	80.215	156.68	0.9659	4.00927e-96	2.36077e-95
TEX264	5402	5788	480	513	113.68	114.64	19.93	21.71	114.16	20.82	-2.455	4.18623e-96	2.46363e-95
THOC2	5128	5600	4537	4675	107.92	110.92	188.42	197.8	109.42	193.11	0.8195	4.64402e-96	2.73157e-95
CNKSR2	2455	2672	48	64	51.66	52.92	1.99	2.71	52.29	2.35	-4.4758	5.90789e-96	3.47309e-95
WDR59	3012	3143	3089	3187	63.39	62.25	128.28	134.84	62.82	131.56	1.0664	6.18444e-96	3.63369e-95
BCO2	1085	1214	1714	1754	22.83	24.05	71.18	74.21	23.44	72.695	1.6329	6.57744e-96	3.86251e-95
HIP1	11011	11128	1125	1333	231.72	220.41	46.72	56.4	226.065	51.56	-2.1324	7.19328e-96	4.22187e-95
PTPRB	2039	2327	2538	2630	42.91	46.09	105.4	111.28	44.5	108.34	1.2837	7.98902e-96	4.68637e-95
LBR	2615	2628	64	73	55.03	52.05	2.66	3.09	53.54	2.875	-4.219	8.45439e-96	4.95668e-95
SIRT4	539	585	1182	1186	11.34	11.59	49.09	50.18	11.465	49.635	2.1141	1.08609e-95	6.36415e-95
METTL23	257	287	851	1005	5.41	5.68	35.34	42.52	5.545	38.93	2.8116	1.14656e-95	6.71483e-95
MFSD1	3529	3829	198	214	74.27	75.84	8.22	9.05	75.055	8.635	-3.1197	1.17182e-95	6.85908e-95
RUSC1	4506	4359	4455	4282	94.83	86.34	185.01	181.17	90.585	183.09	1.0152	1.53432e-95	8.97609e-95
FAM83H	1360	1449	1912	1915	28.62	28.7	79.4	81.02	28.66	80.21	1.4847	1.67253e-95	9.7794e-95
MAOB	169	193	777	720	3.56	3.82	32.27	30.46	3.69	31.365	3.0875	2.28522e-95	1.33546e-94
MAST2	6595	7240	739	742	138.79	143.4	30.69	31.39	141.095	31.04	-2.1845	2.77006e-95	1.61793e-94
CCM2L	234	239	973	807	4.92	4.73	40.41	34.14	4.825	37.275	2.9496	2.8632e-95	1.67143e-94
TRA2A	9242	10303	7444	7249	194.49	204.07	309.14	306.71	199.28	307.925	0.6278	3.02929e-95	1.76744e-94
VPS13A	2326	2581	22	28	48.95	51.12	0.91	1.18	50.035	1.045	-5.5814	3.4819e-95	2.03042e-94
RTCA	1599	1732	2087	2167	33.65	34.31	86.67	91.69	33.98	89.18	1.392	5.22305e-95	3.04411e-94
SBNO1	7398	7924	815	886	155.69	156.95	33.85	37.49	156.32	35.67	-2.1317	5.32443e-95	3.10154e-94
GDPD5	3697	3927	3546	3600	77.8	77.78	147.26	152.32	77.79	149.79	0.9453	5.46486e-95	3.18163e-94
ABHD18	1167	1234	1727	1780	24.56	24.44	71.72	75.31	24.5	73.515	1.5853	7.65203e-95	4.45261e-94
TNNC2	2408	2643	17	33	50.68	52.35	0.71	1.4	51.515	1.055	-5.6097	9.1605e-95	5.32751e-94
SLC7A9	137	160	700	678	2.88	3.17	29.07	28.69	3.025	28.88	3.2551	1.20149e-94	6.98385e-94
LOX	3135	3353	3345	3182	65.97	66.41	138.91	134.63	66.19	136.77	1.0471	1.33559e-94	7.75914e-94
RFX3	2228	2660	29	34	46.89	52.69	1.2	1.44	49.79	1.32	-5.2372	1.99745e-94	1.1598e-93
ARPC1A	7732	8232	7431	6595	162.72	163.05	308.6	279.04	162.885	293.82	0.8511	2.01862e-94	1.17147e-93
CHPT1	4869	5444	435	424	102.47	107.83	18.07	17.94	105.15	18.005	-2.546	2.41886e-94	1.40299e-93
SNRPD3	7137	7561	781	838	150.19	149.76	32.43	35.46	149.975	33.945	-2.1435	2.51746e-94	1.4594e-93
RANBP3L	412	490	1164	1069	8.67	9.71	48.34	45.23	9.19	46.785	2.3479	2.63961e-94	1.5294e-93
DERA	865	835	1515	1488	18.2	16.54	62.92	62.96	17.37	62.94	1.8574	2.7911e-94	1.6163e-93
DPT	69	56	592	539	1.45	1.11	24.59	22.81	1.28	23.7	4.2107	4.336e-94	2.50961e-93
RAB2A	10360	12137	1413	1457	218.02	240.4	58.68	61.65	229.21	60.165	-1.9297	6.48954e-94	3.75405e-93
EIF1	19888	21134	3696	3519	418.53	418.61	153.49	148.89	418.57	151.19	-1.4691	6.72208e-94	3.88649e-93
PTN	11500	13480	9646	9568	242.01	267	400.59	404.83	254.505	402.71	0.662	7.02864e-94	4.06157e-93
ARPC5L	921	864	1731	1560	19.38	17.11	71.89	66	18.245	68.945	1.9179	8.26816e-94	4.77531e-93
GXYLT1	1097	1303	1808	1850	23.09	25.81	75.08	78.27	24.45	76.675	1.6489	9.24467e-94	5.33645e-93
DUSP7	3003	3450	99	135	63.2	68.33	4.11	5.71	65.765	4.91	-3.7435	9.399e-94	5.42265e-93
RPS6KA6	4288	4941	300	336	90.24	97.87	12.46	14.22	94.055	13.34	-2.8177	1.02929e-93	5.93522e-93
AK5	2424	2644	68	53	51.01	52.37	2.82	2.24	51.69	2.53	-4.3527	1.09722e-93	6.32356e-93
RAN	6041	6498	5013	5115	127.13	128.71	208.19	216.42	127.92	212.305	0.7309	1.35906e-93	7.82845e-93
KLF12	2503	2884	17	16	52.67	57.12	0.71	0.68	54.895	0.695	-6.3035	1.54137e-93	8.87393e-93
RFX2	841	864	1473	1434	17.7	17.11	61.17	60.67	17.405	60.92	1.8074	1.56891e-93	9.02765e-93
DOK4	1738	1884	2197	2210	36.58	37.32	91.24	93.51	36.95	92.375	1.3219	1.68132e-93	9.66937e-93
GNAI2	15690	16722	2462	2166	330.19	331.22	102.24	91.64	330.705	96.94	-1.7704	1.74935e-93	1.00553e-92
PRDM10	4091	4268	265	293	86.09	84.54	11.01	12.4	85.315	11.705	-2.8657	1.79132e-93	1.02911e-92
SLMAP	5222	5464	4780	4521	109.89	108.23	198.51	191.29	109.06	194.9	0.8376	2.05982e-93	1.18274e-92
HMGB1	7936	8612	1012	937	167.01	170.58	42.03	39.64	168.795	40.835	-2.0474	2.91066e-93	1.6704e-92
CDKL2	2933	3383	118	140	61.72	67.01	4.9	5.92	64.365	5.41	-3.5726	3.028e-93	1.73682e-92
LOXL2	1540	1527	2036	2063	32.41	30.25	84.55	87.29	31.33	85.92	1.4554	3.30518e-93	1.89481e-92
FBXO46	1994	1980	2583	2392	41.96	39.22	107.27	101.21	40.59	104.24	1.3607	3.32948e-93	1.90773e-92
DLX5	1877	1961	2320	2261	39.5	38.84	96.35	95.66	39.17	96.005	1.2934	5.00501e-93	2.86627e-92
IFT172	5593	5648	5409	4936	117.7	111.87	224.63	208.84	114.785	216.735	0.917	5.80384e-93	3.32199e-92
DIP2B	10593	11784	1593	1569	222.92	233.41	66.16	66.39	228.165	66.275	-1.7835	5.96116e-93	3.41024e-92
RBSN	4463	4762	341	283	93.92	94.32	14.16	11.97	94.12	13.065	-2.8488	7.01442e-93	4.01067e-92
TAC1	174	205	733	753	3.66	4.06	30.44	31.86	3.86	31.15	3.0126	8.10905e-93	4.63411e-92
GNE	8695	9295	1013	1131	182.98	184.11	42.07	47.85	183.545	44.96	-2.0294	8.78432e-93	5.01737e-92
NPLOC4	8991	9447	1188	1226	189.21	187.12	49.34	51.87	188.165	50.605	-1.8946	1.1452e-92	6.53762e-92
FADS6	2610	2666	14	19	54.93	52.81	0.58	0.8	53.87	0.69	-6.2867	1.18873e-92	6.78259e-92
EI24	4601	4990	395	378	96.83	98.84	16.4	15.99	97.835	16.195	-2.5948	1.32627e-92	7.56337e-92
ITPRIP	2735	2956	82	107	57.56	58.55	3.41	4.53	58.055	3.97	-3.8702	1.37513e-92	7.83787e-92
PTGS1	4136	4113	274	243	87.04	81.47	11.38	10.28	84.255	10.83	-2.9597	1.54185e-92	8.78353e-92
PSMC5	7471	7681	5894	5871	157.22	152.14	244.77	248.4	154.68	246.585	0.6728	1.66915e-92	9.50373e-92
DDX5	50637	55170	11642	11500	1065.63	1092.76	483.48	486.57	1079.19	485.025	-1.1538	1.78346e-92	1.01493e-91
XKR6	2333	2735	27	15	49.1	54.17	1.12	0.63	51.635	0.875	-5.8829	1.98982e-92	1.13177e-91
AP1S2	2489	2834	2924	2841	52.38	56.13	121.43	120.2	54.255	120.815	1.155	2.06391e-92	1.17329e-91
CACNA1I	455	413	1135	1075	9.58	8.18	47.14	45.48	8.88	46.31	2.3827	2.12711e-92	1.20859e-91
UNC119	572	629	1256	1182	12.04	12.46	52.16	50.01	12.25	51.085	2.0601	2.22822e-92	1.26538e-91
SFXN4	1029	1144	1671	1625	21.65	22.66	69.4	68.75	22.155	69.075	1.6405	2.73675e-92	1.55335e-91
PRELID3B	2628	2751	2782	2855	55.31	54.49	115.53	120.8	54.9	118.165	1.1059	3.23978e-92	1.83791e-91
SBDS	5923	6451	4982	4995	124.65	127.78	206.9	211.34	126.215	209.12	0.7284	4.41777e-92	2.50486e-91
BRD9	1779	1836	2277	2623	37.44	36.37	94.56	110.98	36.905	102.77	1.4775	4.83962e-92	2.74262e-91
ELAVL1	5585	6179	570	571	117.53	122.39	23.67	24.16	119.96	23.915	-2.3266	6.00054e-92	3.39874e-91
REEP3	3659	4120	3745	4140	77	81.61	155.53	175.17	79.305	165.35	1.06	6.44615e-92	3.64924e-91
TMEM50B	5592	6126	577	554	117.68	121.34	23.96	23.44	119.51	23.7	-2.3342	6.76859e-92	3.82978e-91
TOMM7	6450	6916	650	538	135.74	136.99	26.99	22.76	136.365	24.875	-2.4547	7.37704e-92	4.17187e-91
C2CD5	3382	3594	3805	3425	71.17	71.19	158.02	144.91	71.18	151.465	1.0894	8.16316e-92	4.61403e-91
BPTF	5667	5950	4823	4725	119.26	117.85	200.29	199.92	118.555	200.105	0.7552	9.0866e-92	5.13331e-91
PLA2G7	4031	4088	261	214	84.83	80.97	10.84	9.05	82.9	9.945	-3.0593	1.08686e-91	6.13681e-91
CDH7	2215	2560	50	41	46.61	50.71	2.08	1.73	48.66	1.905	-4.6749	1.4499e-91	8.18242e-91
SH3KBP1	3331	3707	159	194	70.1	73.43	6.6	8.21	71.765	7.405	-3.2767	1.81032e-91	1.02111e-90
RRM1	7007	7529	827	751	147.46	149.13	34.34	31.78	148.295	33.06	-2.1653	2.19881e-91	1.2396e-90
RPP30	866	808	1486	1653	18.22	16	61.71	69.94	17.11	65.825	1.9438	2.25838e-91	1.27252e-90
MEIS2	1357	1378	1845	1964	28.56	27.29	76.62	83.1	27.925	79.86	1.5159	2.71091e-91	1.52672e-90
TNKS	10935	11197	1591	1547	230.12	221.78	66.07	65.45	225.95	65.76	-1.7807	3.34804e-91	1.88455e-90
TMEM255B	10329	11160	1483	1555	217.37	221.05	61.59	65.79	219.21	63.69	-1.7832	3.46568e-91	1.94976e-90
TMEM184B	10314	11075	1454	1541	217.05	219.36	60.38	65.2	218.205	62.79	-1.7971	3.92166e-91	2.20515e-90
GALNT2	5321	5459	495	463	111.98	108.13	20.56	19.59	110.055	20.075	-2.4548	4.5177e-91	2.53899e-90
SMNDC1	2117	2308	2506	2447	44.55	45.72	104.07	103.53	45.135	103.8	1.2015	4.98175e-91	2.79834e-90
TNRC6B	5986	6667	648	592	125.97	132.05	26.91	25.05	129.01	25.98	-2.312	5.94733e-91	3.33899e-90
KCNA2	2544	2881	10	20	53.54	57.06	0.42	0.85	55.3	0.635	-6.4444	7.8582e-91	4.40953e-90
AASDHPPT	465	572	1298	1150	9.79	11.33	53.9	48.66	10.56	51.28	2.2798	8.29874e-91	4.65432e-90
SLC45A3	4142	4740	328	299	87.17	93.89	13.62	12.65	90.53	13.135	-2.785	9.51606e-91	5.3343e-90
S1PR1	2302	2694	2782	2981	48.44	53.36	115.53	126.13	50.9	120.83	1.2472	1.01787e-90	5.70281e-90
SCAF11	4326	4756	4073	4458	91.04	94.2	169.15	188.62	92.62	178.885	0.9496	1.02958e-90	5.76546e-90
AGO1	2718	2944	86	111	57.2	58.31	3.57	4.7	57.755	4.135	-3.804	1.13822e-90	6.37051e-90
TNPO1	3639	4132	166	221	76.58	81.84	6.89	9.35	79.21	8.12	-3.2861	1.36823e-90	7.65392e-90
MMP28	728	794	1392	1318	15.32	15.73	57.81	55.77	15.525	56.79	1.871	1.41054e-90	7.88654e-90
DIMT1	501	496	1108	1094	10.54	9.82	46.01	46.29	10.18	46.15	2.1806	1.41572e-90	7.91142e-90
WDR11	3626	3990	3581	3506	76.31	79.03	148.72	148.34	77.67	148.53	0.9353	1.45938e-90	8.15123e-90
MN1	8643	9134	1177	1143	181.89	180.92	48.88	48.36	181.405	48.62	-1.8996	1.7154e-90	9.57623e-90
GNA14	157	153	666	691	3.3	3.03	27.66	29.24	3.165	28.45	3.1682	1.8167e-90	1.01366e-89
KHK	25	32	527	454	0.53	0.63	21.89	19.21	0.58	20.55	5.1469	1.82765e-90	1.01924e-89
CAST	2781	3279	3580	3252	58.52	64.95	148.67	137.59	61.735	143.13	1.2132	2.1266e-90	1.18535e-89
TRAFD1	3861	4297	281	245	81.25	85.11	11.67	10.37	83.18	11.02	-2.9161	2.3377e-90	1.30234e-89
TYK2	3557	3557	3426	3524	74.86	70.45	142.28	149.1	72.655	145.69	1.0038	2.35579e-90	1.31175e-89
NPEPL1	2230	2570	3139	2765	46.93	50.9	130.36	116.99	48.915	123.675	1.3382	2.67805e-90	1.49043e-89
LSM12	1459	1614	2116	1964	30.7	31.97	87.88	83.1	31.335	85.49	1.448	3.13767e-90	1.74533e-89
BTBD3	3623	4125	243	249	76.24	81.7	10.09	10.54	78.97	10.315	-2.9366	3.22804e-90	1.79468e-89
GLDC	2929	2956	2987	3156	61.64	58.55	124.05	133.53	60.095	128.79	1.0997	3.81167e-90	2.11807e-89
CPEB3	1637	1881	2178	2208	34.45	37.26	90.45	93.42	35.855	91.935	1.3584	4.09711e-90	2.27552e-89
SLC25A47	2366	2664	75	62	49.79	52.77	3.11	2.62	51.28	2.865	-4.1618	4.19398e-90	2.32813e-89
LHCGR	68	67	525	529	1.43	1.33	21.8	22.38	1.38	22.09	4.0007	5.13298e-90	2.84792e-89
FBXO9	9535	10632	1199	1335	200.66	210.59	49.79	56.48	205.625	53.135	-1.9523	5.20651e-90	2.88725e-89
ALG8	960	1014	1598	1508	20.2	20.08	66.36	63.8	20.14	65.08	1.6922	5.56827e-90	3.08628e-89
PIEZO1	2705	2772	2875	2814	56.93	54.91	119.4	119.06	55.92	119.23	1.0923	9.68313e-90	5.36425e-89
AFF2	2211	2310	42	42	46.53	45.75	1.74	1.78	46.14	1.76	-4.7124	1.03846e-89	5.74995e-89
NR2F2	4463	5056	4261	4187	93.92	100.15	176.96	177.15	97.035	177.055	0.8676	1.04987e-89	5.81013e-89
MPP7	5746	6586	612	586	120.92	130.45	25.42	24.79	125.685	25.105	-2.3238	1.06688e-89	5.90129e-89
SLC35G2	2122	2428	26	28	44.66	48.09	1.08	1.18	46.375	1.13	-5.359	1.38383e-89	7.65055e-89
PTDSS2	7934	8077	881	963	166.97	159.98	36.59	40.74	163.475	38.665	-2.08	1.38628e-89	7.66017e-89
SLC8A1	2676	2638	72	42	56.32	52.25	2.99	1.78	54.285	2.385	-4.5085	2.07454e-89	1.14575e-88
INPP5F	3382	3587	3472	3276	71.17	71.05	144.19	138.61	71.11	141.4	0.9917	2.26097e-89	1.24807e-88
RAB40B	223	213	798	751	4.69	4.22	33.14	31.78	4.455	32.46	2.8652	2.38042e-89	1.31335e-88
CBX4	2902	2807	9	17	61.07	55.6	0.37	0.72	58.335	0.545	-6.742	2.39598e-89	1.32125e-88
KLHL5	7201	7562	820	709	151.54	149.78	34.05	30	150.66	32.025	-2.234	2.49467e-89	1.37498e-88
ERP29	8147	8777	931	1048	171.45	173.85	38.66	44.34	172.65	41.5	-2.0567	2.55539e-89	1.40773e-88
DDX18	1495	1625	1963	1992	31.46	32.19	81.52	84.28	31.825	82.9	1.3812	2.63127e-89	1.4488e-88
NSFL1C	4122	4137	4292	3895	86.75	81.94	178.24	164.8	84.345	171.52	1.024	3.09411e-89	1.70278e-88
KCTD5	3629	3769	231	237	76.37	74.65	9.59	10.03	75.51	9.81	-2.9443	3.17948e-89	1.74888e-88
MSN	11352	12036	7981	8070	238.9	238.4	331.44	341.45	238.65	336.445	0.4955	3.736e-89	2.05395e-88
TMPRSS3	3408	3486	3271	3402	71.72	69.05	135.84	143.94	70.385	139.89	0.991	4.23209e-89	2.32551e-88
PDAP1	5629	5886	4687	4675	118.46	116.59	194.65	197.8	117.525	196.225	0.7395	4.47946e-89	2.46019e-88
AOPEP	1243	1377	1769	1890	26.16	27.27	73.46	79.97	26.715	76.715	1.5219	4.74329e-89	2.60378e-88
CACNA1H	824	937	1484	1433	17.34	18.56	61.63	60.63	17.95	61.13	1.7679	4.77694e-89	2.62092e-88
CDC14A	7887	8704	986	1048	165.98	172.4	40.95	44.34	169.19	42.645	-1.9882	4.79838e-89	2.63136e-88
PNPLA2	3537	3791	226	235	74.43	75.09	9.39	9.94	74.76	9.665	-2.9514	5.35422e-89	2.93469e-88
COPZ1	4699	4830	4158	4486	98.89	95.67	172.68	189.8	97.28	181.24	0.8977	5.89932e-89	3.23183e-88
EIF2B4	2983	3263	3520	3152	62.78	64.63	146.18	133.36	63.705	139.77	1.1336	6.52974e-89	3.57539e-88
MAT2B	6982	7680	751	615	146.93	152.12	31.19	26.02	149.525	28.605	-2.386	6.54163e-89	3.58009e-88
FBRSL1	3060	3370	3245	3104	64.4	66.75	134.76	131.33	65.575	133.045	1.0207	6.65605e-89	3.64087e-88
IRF1	4989	5093	422	447	104.99	100.88	17.53	18.91	102.935	18.22	-2.4981	7.2832e-89	3.98192e-88
GTF2E1	2401	2271	41	29	50.53	44.98	1.7	1.23	47.755	1.465	-5.0267	7.56803e-89	4.13556e-88
IBSP	2216	2263	33	26	46.63	44.82	1.37	1.1	45.725	1.235	-5.2104	8.06216e-89	4.40337e-88
LAPTM5	2454	2497	23	12	51.64	49.46	0.96	0.51	50.55	0.735	-6.1038	8.29942e-89	4.53067e-88
ZBTB37	6669	7013	763	689	140.35	138.91	31.69	29.15	139.63	30.42	-2.1985	1.18175e-88	6.44798e-88
AXL	14601	15399	1847	2172	307.27	305.01	76.7	91.9	306.14	84.3	-1.8606	1.30313e-88	7.10668e-88
DENND5A	4890	5192	4601	4280	102.91	102.84	191.08	181.09	102.875	186.085	0.8551	1.30895e-88	7.13485e-88
UBXN7	4480	4903	393	385	94.28	97.11	16.32	16.29	95.695	16.305	-2.5531	1.3642e-88	7.43225e-88
ARHGAP44	1205	1146	1778	1759	25.36	22.7	73.84	74.42	24.03	74.13	1.6252	1.46718e-88	7.98928e-88
PRELP	9699	9606	1089	1217	204.11	190.27	45.23	51.49	197.19	48.36	-2.0277	1.67025e-88	9.09053e-88
SGSM2	2229	2294	33	22	46.91	45.44	1.37	0.93	46.175	1.15	-5.3274	1.92893e-88	1.04932e-87
GPR158	2537	2402	65	51	53.39	47.58	2.7	2.16	50.485	2.43	-4.3768	2.39626e-88	1.30288e-87
ACSS2	4762	4883	414	403	100.21	96.72	17.19	17.05	98.465	17.12	-2.5239	3.51543e-88	1.91044e-87
DPAGT1	5989	6246	594	644	126.04	123.72	24.67	27.25	124.88	25.96	-2.2662	4.41964e-88	2.40062e-87
[truncated: 8,859 more rows]

## Sheet: 10858MM-vs-GG.all
id	MM1	MM2	GG1	GG2	MM1_CPM	MM2_CPM	GG1_CPM	GG2_CPM	MM_mean	GG_mean	log2(fc)	PValue	FDR
CPXM1	2742	3265	16446	16196	63.21	64.22	346.1	320.8	63.715	333.45	2.3878	0	0
SLC4A11	35544	41723	1245	1339	819.33	820.67	26.2	26.52	820	26.36	-4.9592	0	0
GFRA4	299	318	4960	5094	6.89	6.25	104.38	100.9	6.57	102.64	3.9656	0	0
LZTS3	1184	1398	7917	8682	27.29	27.5	166.61	171.97	27.395	169.29	2.6275	0	0
SMOX	11779	14014	3664	3801	271.52	275.65	77.11	75.29	273.585	76.2	-1.8441	0	0
CTNNA2	304	291	6790	7648	7.01	5.72	142.89	151.49	6.365	147.19	4.5314	0	0
THNSL2	245	314	4612	4824	5.65	6.18	97.06	95.55	5.915	96.305	4.0252	0	0
ST3GAL5	12454	14620	1287	1351	287.08	287.57	27.08	26.76	287.325	26.92	-3.4159	0	0
CTBP1	19507	23334	8921	9756	449.66	458.97	187.74	193.24	454.315	190.49	-1.254	0	0
SLBP	7295	8447	105	154	168.16	166.15	2.21	3.05	167.155	2.63	-5.99	0	0
NCAPG	3388	4093	111	145	78.1	80.51	2.34	2.87	79.305	2.605	-4.9281	0	0
LGI2	736	858	9406	10225	16.97	16.88	197.94	202.53	16.925	200.235	3.5645	0	0
PGM2L1	2613	3107	18391	19898	60.23	61.11	387.03	394.12	60.67	390.575	2.6865	0	0
KLF3	9781	11460	1844	2039	225.46	225.41	38.81	40.39	225.435	39.6	-2.5091	0	0
CHRNA9	92	99	5318	5799	2.12	1.95	111.91	114.86	2.035	113.385	5.8001	0	0
UCHL1	1739	1912	10428	10996	40.09	37.61	219.45	217.8	38.85	218.625	2.4925	0	0
RASL11B	506	626	6293	6885	11.66	12.31	132.43	136.37	11.985	134.4	3.4872	0	0
ASAH1	3397	3989	16632	17950	78.3	78.46	350.01	355.54	78.38	352.775	2.1702	0	0
NEIL3	3683	4131	127	150	84.9	81.25	2.67	2.97	83.075	2.82	-4.8806	0	0
SCRG1	370	490	5755	6287	8.53	9.64	121.11	124.53	9.085	122.82	3.7569	0	0
HMGB2	33270	37492	1416	1451	766.91	737.44	29.8	28.74	752.175	29.27	-4.6836	0	0
CPE	17285	20054	2657	2866	398.44	394.45	55.92	56.77	396.445	56.345	-2.8148	0	0
TMEM131L	12030	14383	2606	2925	277.31	282.9	54.84	57.94	280.105	56.39	-2.3125	0	0
FHDC1	8039	9882	434	451	185.31	194.37	9.13	8.93	189.84	9.03	-4.3939	0	0
RNF150	1927	2292	10760	11240	44.42	45.08	226.44	222.63	44.75	224.535	2.327	0	0
CCNA2	16368	19334	263	254	377.3	380.29	5.53	5.03	378.795	5.28	-6.1647	0	0
PAPSS1	3235	3843	27153	28319	74.57	75.59	571.42	560.92	75.08	566.17	2.9147	0	0
NPNT	9031	10790	2700	2900	208.17	212.23	56.82	57.44	210.2	57.13	-1.8794	0	0
CENPE	5032	5396	78	112	115.99	106.14	1.64	2.22	111.065	1.93	-5.8467	0	0
MMRN1	4182	4724	126	92	96.4	92.92	2.65	1.82	94.66	2.235	-5.4044	0	0
FAM13A	648	742	6263	6519	14.94	14.59	131.8	129.12	14.765	130.46	3.1434	0	0
DCK	6877	8388	693	686	158.52	164.99	14.58	13.59	161.755	14.085	-3.5216	0	0
JCHAIN	656	892	9561	10129	15.12	17.55	201.21	200.63	16.335	200.92	3.6206	0	0
IBSP	42954	50903	2216	2263	990.14	1001.23	46.63	44.82	995.685	45.725	-4.4446	0	0
CCNI	10329	12580	38809	42330	238.1	247.44	816.72	838.44	242.77	827.58	1.7693	0	0
PRC1	8107	9658	489	560	186.88	189.97	10.29	11.09	188.425	10.69	-4.1397	0	0
GSR	12622	14892	2268	2689	290.95	292.92	47.73	53.26	291.935	50.495	-2.5314	0	0
HNRNPD	15883	18722	4793	5257	366.12	368.25	100.87	104.13	367.185	102.5	-1.8409	0	0
FZR1	15485	18959	4946	4847	356.95	372.91	104.09	96.01	364.93	100.05	-1.8669	0	0
UHRF1	23964	28096	371	408	552.4	552.63	7.81	8.08	552.515	7.945	-6.1198	0	0
TMPRSS9	211	241	9097	9322	4.86	4.74	191.44	184.64	4.8	188.04	5.2919	0	0
PLIN3	4518	5497	94	100	104.15	108.12	1.98	1.98	106.135	1.98	-5.7443	0	0
B4GALT1	7432	8241	954	1143	171.32	162.1	20.08	22.64	166.71	21.36	-2.9644	0	0
LPL	8658	10337	1266	1506	199.58	203.32	26.64	29.83	201.45	28.235	-2.8349	0	0
TCF3	22315	26686	8615	9274	514.39	524.9	181.3	183.69	519.645	182.495	-1.5097	0	0
MIDN	7811	9314	1226	1207	180.05	183.2	25.8	23.91	181.625	24.855	-2.8694	0	0
STK11	19288	22567	2264	2189	444.61	443.88	47.64	43.36	444.245	45.5	-3.2874	0	0
CNN2	22891	26934	1671	1810	527.66	529.77	35.17	35.85	528.715	35.51	-3.8962	0	0
ARHGAP45	36710	41880	1703	1744	846.21	823.75	35.84	34.54	834.98	35.19	-4.5685	0	0
SBNO2	12854	14591	2978	3183	296.3	287	62.67	63.05	291.65	62.86	-2.214	0	0
ARID3A	7342	8146	1083	1127	169.24	160.23	22.79	22.32	164.735	22.555	-2.8686	0	0
R3HDM4	9893	11435	1752	1654	228.04	224.92	36.87	32.76	226.48	34.815	-2.7016	0	0
CFD	458	647	14817	15028	10.56	12.73	311.82	297.66	11.645	304.74	4.7098	0	0
KANK3	680	871	14928	15158	15.67	17.13	314.15	300.24	16.4	307.195	4.2274	0	0
MYO1F	14782	16892	1962	2240	340.74	332.25	41.29	44.37	336.495	42.83	-2.9739	0	0
ADAMTS10	10016	12190	1227	1201	230.88	239.77	25.82	23.79	235.325	24.805	-3.246	0	0
MKNK2	28137	34070	4953	5495	648.59	670.14	104.23	108.84	659.365	106.535	-2.6297	0	0
CSNK1G2	11150	13039	3102	3191	257.02	256.47	65.28	63.2	256.745	64.24	-1.9988	0	0
TPM4	15001	17840	1706	1670	345.79	350.9	35.9	33.08	348.345	34.49	-3.3363	0	0
PRAM1	4797	5493	224	207	110.58	108.04	4.71	4.1	109.31	4.405	-4.6331	0	0
ISYNA1	7320	8699	28671	29379	168.73	171.1	603.37	581.92	169.915	592.645	1.8024	0	0
UBA52	33432	40720	15441	16205	770.65	800.94	324.95	320.98	785.795	322.965	-1.2828	0	0
TMOD1	7778	9137	313	382	179.29	179.72	6.59	7.57	179.505	7.08	-4.6641	0	0
ANP32B	19045	22871	5274	6167	439.01	449.86	110.99	122.15	444.435	116.57	-1.9308	0	0
SMC2	6770	7762	230	282	156.06	152.67	4.84	5.59	154.365	5.215	-4.8875	0	0
SUSD1	5125	6057	587	579	118.14	119.14	12.35	11.47	118.64	11.91	-3.3163	0	0
PTBP3	13617	15848	2325	2859	313.89	311.72	48.93	56.63	312.805	52.78	-2.5672	0	0
SLC25A51	18284	21377	1841	2032	421.47	420.47	38.74	40.25	420.97	39.495	-3.414	0	0
MYO9B	17033	19968	5521	5622	392.63	392.76	116.19	111.36	392.695	113.775	-1.7872	0	0
PLPP2	750	894	7096	7405	17.29	17.58	149.33	146.67	17.435	148	3.0855	0	0
RPS6	5012	5764	45448	49890	115.53	113.37	956.43	988.18	114.45	972.305	3.0867	0	0
PTPRD	7328	8853	941	984	168.92	174.13	19.8	19.49	171.525	19.645	-3.1262	0	0
DOCK8	17407	20190	900	931	401.25	397.12	18.94	18.44	399.185	18.69	-4.4167	0	0
TJP2	2317	2843	13971	13948	53.41	55.92	294.01	276.27	54.665	285.14	2.383	0	0
ALDH1A1	6891	8522	100	100	158.85	167.62	2.1	1.98	163.235	2.04	-6.3222	0	0
ANXA1	18706	22190	1291	1507	431.19	436.46	27.17	29.85	433.825	28.51	-3.9276	0	0
HNRNPK	29523	34870	9267	10122	680.54	685.87	195.02	200.49	683.205	197.755	-1.7886	0	0
ISCA1	11535	13622	1983	2426	265.89	267.94	41.73	48.05	266.915	44.89	-2.5719	0	0
S1PR3	5613	6991	757	785	129.39	137.51	15.93	15.55	133.45	15.74	-3.0838	0	0
SYK	37697	42977	267	217	868.96	845.33	5.62	4.3	857.145	4.96	-7.4331	0	0
ACIN1	23593	26276	5741	5766	543.85	516.83	120.82	114.21	530.34	117.515	-2.1741	0	0
PNP	13771	15249	120	110	317.44	299.94	2.53	2.18	308.69	2.355	-7.0343	0	0
TEP1	4559	5422	191	251	105.09	106.65	4.02	4.97	105.87	4.495	-4.5578	0	0
HNRNPC	9817	11690	2427	2396	226.29	229.93	51.08	47.46	228.11	49.27	-2.2109	0	0
POLE	6174	7053	880	934	142.32	138.73	18.52	18.5	140.525	18.51	-2.9245	0	0
GAL3ST1	408	391	10830	10688	9.4	7.69	227.91	211.7	8.545	219.805	4.685	0	0
EWSR1	38935	44057	8825	9072	897.5	866.57	185.72	179.69	882.035	182.705	-2.2713	0	0
TBX3	496	623	12109	11940	11.43	12.25	254.83	236.5	11.84	245.665	4.375	0	0
GIT2	8706	10156	2175	2394	200.68	199.76	45.77	47.42	200.22	46.595	-2.1033	0	0
ANKRD13A	15951	18781	4738	4811	367.69	369.41	99.71	95.29	368.55	97.5	-1.9184	0	0
MN1	525	707	8643	9134	12.1	13.91	181.89	180.92	13.005	181.405	3.8021	0	0
CIT	8213	9158	715	713	189.32	180.13	15.05	14.12	184.725	14.585	-3.6628	0	0
RPLP0	130002	151773	44416	46529	2996.69	2985.28	934.71	921.61	2990.99	928.16	-1.6882	0	0
PXN	13917	16684	5603	5804	320.8	328.16	117.91	114.96	324.48	116.435	-1.4786	0	0
MSI1	1840	2329	17824	18096	42.41	45.81	375.1	358.43	44.11	366.765	3.0557	0	0
DYNLL1	7419	8308	1025	1179	171.02	163.41	21.57	23.35	167.215	22.46	-2.8963	0	0
RNF10	30909	36826	12496	13270	712.49	724.34	262.97	262.84	718.415	262.905	-1.4503	0	0
CABP1	395	424	8244	8339	9.11	8.34	173.49	165.17	8.725	169.33	4.2785	0	0
MLEC	26825	30796	5974	6261	618.35	605.74	125.72	124.01	612.045	124.865	-2.2933	0	0
YWHAH	16780	19248	4826	4890	386.8	378.6	101.56	96.86	382.7	99.21	-1.9477	0	0
GUCD1	8115	9291	1590	1686	187.06	182.75	33.46	33.39	184.905	33.425	-2.4678	0	0
GGT5	1464	1679	11850	12928	33.75	33.02	249.38	256.07	33.385	252.725	2.9203	0	0
CABIN1	12405	15091	4374	4698	285.95	296.83	92.05	93.05	291.39	92.55	-1.6546	0	0
YPEL1	341	320	5688	6093	7.86	6.29	119.7	120.69	7.075	120.195	4.0865	0	0
TBX1	440	517	29618	30184	10.14	10.17	623.3	597.86	10.155	610.58	5.9099	0	0
GNB1L	191	264	5271	5508	4.4	5.19	110.93	109.1	4.795	110.015	4.52	0	0
ARVCF	957	1186	19947	20568	22.06	23.33	419.78	407.39	22.695	413.585	4.1877	0	0
EP400	19012	21981	5121	5752	438.25	432.35	107.77	113.93	435.3	110.85	-1.9734	0	0
RAN	20837	24651	6041	6498	480.32	484.87	127.13	128.71	482.595	127.92	-1.9156	0	0
STX2	8461	9640	1444	1642	195.04	189.61	30.39	32.52	192.325	31.455	-2.6122	0	0
KMT5A	8166	9238	1288	1412	188.24	181.71	27.11	27.97	184.975	27.54	-2.7477	0	0
MLXIP	11244	12691	2418	2549	259.19	249.62	50.89	50.49	254.405	50.69	-2.3274	0	0
BCL7A	8824	10507	1777	1930	203.4	206.67	37.4	38.23	205.035	37.815	-2.4388	0	0
RHOF	7369	8740	718	754	169.86	171.91	15.11	14.93	170.885	15.02	-3.5081	0	0
ANAPC5	23186	27795	850	951	534.46	546.71	17.89	18.84	540.585	18.365	-4.8795	0	0
ARPC3	9990	11163	2416	2603	230.28	219.57	50.84	51.56	224.925	51.2	-2.1352	0	0
PPP1CC	14940	17980	5314	5894	344.38	353.66	111.83	116.74	349.02	114.285	-1.6107	0	0
ALDH2	41151	48878	21699	22941	948.58	961.4	456.65	454.4	954.99	455.525	-1.068	0	0
SH2B3	9999	12293	1558	1597	230.49	241.8	32.79	31.63	236.145	32.21	-2.8741	0	0
CUX2	491	532	6261	6649	11.32	10.46	131.76	131.7	10.89	131.73	3.5965	0	0
HECTD4	32544	38107	12357	13526	750.18	749.54	260.05	267.91	749.86	263.98	-1.5062	0	0
WSCD2	251	335	7301	7573	5.79	6.59	153.65	150	6.19	151.825	4.6163	0	0
TCN2	10976	13073	1718	1701	253.01	257.14	36.15	33.69	255.075	34.92	-2.8688	0	0
OSBP2	296	353	6469	7009	6.82	6.94	136.14	138.83	6.88	137.485	4.3207	0	0
TRIM36	595	769	6534	6796	13.72	15.13	137.51	134.61	14.425	136.06	3.2376	0	0
GLRX	3366	3821	168	193	77.59	75.16	3.54	3.82	76.375	3.68	-4.3753	0	0
ADGRV1	96	88	13959	15271	2.21	1.73	293.76	302.48	1.97	298.12	7.2416	0	0
MEF2C	6303	7973	941	981	145.29	156.82	19.8	19.43	151.055	19.615	-2.945	0	0
SERINC5	17610	20524	2973	3516	405.93	403.69	62.57	69.64	404.81	66.105	-2.6144	0	0
PIK3R1	12079	14566	1402	1353	278.43	286.5	29.5	26.8	282.465	28.15	-3.3269	0	0
NPR3	198	271	12883	15053	4.56	5.33	271.12	298.16	4.945	284.64	5.847	0	0
ATP8B1	494	462	12783	13491	11.39	9.09	269.01	267.22	10.24	268.115	4.7106	0	0
FECH	31761	37056	2100	2266	732.13	728.87	44.19	44.88	730.5	44.535	-4.0359	0	0
RPL17	1040	1154	27563	28270	23.97	22.7	580.05	559.95	23.335	570	4.6104	0	0
RGP1	8323	9768	2106	2285	191.85	192.13	44.32	45.26	191.99	44.79	-2.0998	0	0
TLN1	100623	118634	28989	29687	2319.47	2333.46	610.06	588.02	2326.47	599.04	-1.9574	0	0
ADGRL3	544	667	9493	10380	12.54	13.12	199.78	205.6	12.83	202.69	3.9817	0	0
MBD3	7822	9239	1799	2050	180.31	181.73	37.86	40.6	181.02	39.23	-2.2061	0	0
GDF3	146	187	5617	5737	3.37	3.68	118.21	113.63	3.525	115.92	5.0394	0	0
PIP5K1C	11942	14289	3680	3700	275.28	281.06	77.44	73.29	278.17	75.365	-1.884	0	0
DGCR6	391	492	5608	5915	9.01	9.68	118.02	117.16	9.345	117.59	3.6534	0	0
PTPN11	16857	20315	5272	5676	388.57	399.58	110.95	112.43	394.075	111.69	-1.819	0	0
BTF3	11924	13495	2515	2639	274.86	265.44	52.93	52.27	270.15	52.6	-2.3606	0	0
AP3B2	1067	1283	13484	13661	24.6	25.24	283.76	270.59	24.92	277.175	3.4754	0	0
CBS	201	309	7519	8369	4.63	6.08	158.23	165.77	5.355	162	4.919	0	0
ATP1A1	57386	66166	286059	304060	1322.81	1301.44	6019.98	6022.58	1312.12	6021.28	2.1982	0	0
TRAPPC10	10236	11999	3128	3491	235.95	236.01	65.83	69.15	235.98	67.49	-1.8059	0	0
STXBP5L	117	124	3843	4308	2.7	2.44	80.87	85.33	2.57	83.1	5.015	0	0
ZBTB20	3032	3580	22225	22926	69.89	70.42	467.71	454.1	70.155	460.905	2.7159	0	0
LSAMP	659	788	7088	7324	15.19	15.5	149.16	145.07	15.345	147.115	3.2611	0	0
KCNE1	1818	2198	13964	14995	41.91	43.23	293.87	297.01	42.57	295.44	2.795	0	0
GART	6869	8368	30	43	158.34	164.59	0.63	0.85	161.465	0.74	-7.7695	0	0
CPOX	23556	27651	2022	2144	542.99	543.88	42.55	42.47	543.435	42.51	-3.6762	0	0
USP25	10750	12564	3457	3686	247.8	247.13	72.75	73.01	247.465	72.88	-1.7636	0	0
UBB	125015	152056	35120	36667	2881.74	2990.85	739.08	726.27	2936.3	732.675	-2.0028	0	0
SSH2	8537	10038	2483	2649	196.79	197.44	52.25	52.47	197.115	52.36	-1.9125	0	0
ALDOC	2126	2626	29897	30671	49.01	51.65	629.17	607.51	50.33	618.34	3.6189	0	0
SERPINF2	27	48	18174	19074	0.62	0.94	382.46	377.8	0.78	380.13	8.9288	0	0
PDK3	1678	2003	9447	10431	38.68	39.4	198.81	206.61	39.04	202.71	2.3764	0	0
CLDN4	640	859	6986	7660	14.75	16.9	147.02	151.72	15.825	149.37	3.2386	0	0
CLDN3	763	809	30595	31425	17.59	15.91	643.86	622.44	16.75	633.15	5.2403	0	0
PHEX	11618	13731	248	251	267.81	270.08	5.22	4.97	268.945	5.095	-5.7221	0	0
TMEM248	5774	6738	23212	24882	133.1	132.53	488.49	492.84	132.815	490.665	1.8853	0	0
RAB44	8377	9215	328	296	193.1	181.25	6.9	5.86	187.175	6.38	-4.8747	0	0
COL8A2	1620	1996	21122	22823	37.34	39.26	444.5	452.06	38.3	448.28	3.549	0	0
CSF3R	16638	19308	424	403	383.52	379.78	8.92	7.98	381.65	8.45	-5.4972	0	0
ARID1A	26152	32307	8782	9353	602.83	635.46	184.81	185.26	619.145	185.035	-1.7425	0	0
ADIPOR1	20120	24407	8062	8596	463.79	480.07	169.66	170.26	471.93	169.96	-1.4734	0	0
SYNRG	4572	5270	16199	17216	105.39	103.66	340.9	341	104.525	340.95	1.7057	0	0
RASSF5	5241	6009	372	358	120.81	118.19	7.83	7.09	119.5	7.46	-4.0017	0	0
PM20D1	37	32	5558	5864	0.85	0.63	116.97	116.15	0.74	116.56	7.2993	0	0
CSRP1	16336	19001	3661	3745	376.56	373.74	77.04	74.18	375.15	75.61	-2.3108	0	0
SLC16A1	10364	12132	1419	1508	238.9	238.63	29.86	29.87	238.765	29.865	-2.9991	0	0
SRPX	1239	1368	9380	9793	28.56	26.91	197.4	193.97	27.735	195.685	2.8188	0	0
F5	7649	9467	1265	1484	176.32	186.21	26.62	29.39	181.265	28.005	-2.6943	0	0
LAPTM5	18701	22787	2454	2497	431.08	448.21	51.64	49.46	439.645	50.55	-3.1206	0	0
EPB41	45311	51857	4941	5250	1044.47	1019.99	103.98	103.99	1032.23	103.985	-3.3113	0	0
COL9A2	5401	6918	84301	84428	124.5	136.07	1774.08	1672.28	130.285	1723.18	3.7253	0	0
CAP1	31422	37901	9758	10393	724.31	745.49	205.35	205.86	734.9	205.605	-1.8377	0	0
PABPC4	21964	25303	1154	1154	506.3	497.69	24.29	22.86	501.995	23.575	-4.4123	0	0
YPEL2	704	816	7642	8174	16.23	16.05	160.82	161.9	16.14	161.36	3.3216	0	0
SSC4D	525	565	7950	7839	12.1	11.11	167.3	155.27	11.605	161.285	3.7968	0	0
RBBP7	8218	9899	441	457	189.43	194.71	9.28	9.05	192.07	9.165	-4.3894	0	0
RFLNB	8664	10342	1380	1462	199.72	203.42	29.04	28.96	201.57	29	-2.7972	0	0
PHKG1	355	395	5051	5238	8.18	7.77	106.3	103.75	7.975	105.025	3.7191	0	0
AUTS2	583	635	5992	6549	13.44	12.49	126.1	129.72	12.965	127.91	3.3024	0	0
GTF2I	13077	14952	3381	3438	301.44	294.1	71.15	68.1	297.77	69.625	-2.0965	0	0
MYBBP1A	10136	12034	1176	1308	233.65	236.7	24.75	25.91	235.175	25.33	-3.2148	0	0
ATP2A3	18948	23024	2331	2229	436.77	452.87	49.05	44.15	444.82	46.6	-3.2548	0	0
ZPLD1	176	259	15097	16361	4.06	5.09	317.71	324.07	4.575	320.89	6.1322	0	0
RABEP1	1232	1246	10372	11267	28.4	24.51	218.27	223.17	26.455	220.72	3.0606	0	0
WSB1	5568	6490	19002	19664	128.35	127.65	399.89	389.49	128	394.69	1.6246	0	0
HJURP	22479	26456	91	87	518.17	520.37	1.92	1.72	519.27	1.82	-8.1564	0	0
TMEM47	1009	1180	9432	10344	23.26	23.21	198.49	204.89	23.235	201.69	3.1178	0	0
DMD	537	774	16591	17550	12.38	15.22	349.15	347.62	13.8	348.385	4.6579	0	0
CYBB	21812	26240	397	473	502.79	516.12	8.35	9.37	509.455	8.86	-5.8455	0	0
LIMS1	12790	15158	4885	5183	294.82	298.15	102.8	102.66	296.485	102.73	-1.5291	0	0
CREG2	128	168	5447	5927	2.95	3.3	114.63	117.4	3.125	116.015	5.2143	0	0
RASA3	17311	20628	1646	1804	399.04	405.74	34.64	35.73	402.39	35.185	-3.5156	0	0
GAS6	12646	14568	2711	2648	291.5	286.54	57.05	52.45	289.02	54.75	-2.4002	0	0
TMEM255B	388	448	10329	11160	8.94	8.81	217.37	221.05	8.875	219.21	4.6264	0	0
TMEM131	11932	14004	3335	3393	275.05	275.45	70.18	67.21	275.25	68.695	-2.0025	0	0
SLC9A7	1550	1861	11122	12320	35.73	36.6	234.06	244.02	36.165	239.04	2.7246	0	0
CUL4A	11396	12701	2275	2639	262.69	249.82	47.88	52.27	256.255	50.075	-2.3554	0	0
STK24	10187	11864	2041	2222	234.82	233.36	42.95	44.01	234.09	43.48	-2.4286	0	0
DCT	5318	6037	36	42	122.59	118.74	0.76	0.83	120.665	0.795	-7.2458	0	0
NDFIP2	1566	1873	11662	12418	36.1	36.84	245.42	245.97	36.47	245.695	2.7521	0	0
KCTD12	13867	17002	2640	2973	319.65	334.42	55.56	58.89	327.035	57.225	-2.5147	0	0
PCDH20	468	684	9647	10340	10.79	13.45	203.02	204.81	12.12	203.915	4.0725	0	0
RGCC	3765	4329	99	70	86.79	85.15	2.08	1.39	85.97	1.735	-5.6308	0	0
TPT1	78253	93692	51381	54105	1803.82	1842.86	1081.29	1071.67	1823.34	1076.48	-0.7603	0	0
LCP1	37729	42246	3573	3982	869.7	830.95	75.19	78.87	850.325	77.03	-3.4645	0	0
ITM2B	63950	75183	24539	25758	1474.12	1478.8	516.41	510.19	1476.46	513.3	-1.5243	0	0
ADCY6	14327	16649	3535	3924	330.25	327.48	74.39	77.72	328.865	76.055	-2.1124	0	0
KMT2D	24201	29095	12460	13191	557.86	572.28	262.21	261.28	565.07	261.745	-1.1103	0	0
ANKRD52	11727	14045	3257	3338	270.32	276.26	68.54	66.12	273.29	67.33	-2.0211	0	0
SMARCC2	16360	18896	6255	6512	377.12	371.67	131.63	128.98	374.395	130.305	-1.5227	0	0
PA2G4	10436	12132	3196	3378	240.56	238.63	67.26	66.91	239.595	67.085	-1.8365	0	0
CDK2	6180	6790	592	623	142.46	133.56	12.46	12.34	138.01	12.4	-3.4764	0	0
GLS2	184	250	6617	7214	4.24	4.92	139.25	142.89	4.58	141.07	4.9449	0	0
BAZ2A	15642	18374	6663	6906	360.57	361.41	140.22	136.79	360.99	138.505	-1.382	0	0
BIN2	8414	9503	675	600	193.95	186.92	14.21	11.88	190.435	13.045	-3.8677	0	0
DAZAP2	19090	22178	1122	1163	440.05	436.23	23.61	23.04	438.14	23.325	-4.2314	0	0
GALNT6	1326	1566	9958	10816	30.57	30.8	209.56	214.23	30.685	211.895	2.7877	0	0
SLC4A8	587	812	11816	12250	13.53	15.97	248.66	242.64	14.75	245.65	4.0578	0	0
PFKM	11011	11977	254	243	253.82	235.58	5.35	4.81	244.7	5.08	-5.59	0	0
COL2A1	54720	64151	2591	2669	1261.36	1261.81	54.53	52.87	1261.59	53.7	-4.5542	0	0
VDR	10652	12564	658	641	245.54	247.13	13.85	12.7	246.335	13.275	-4.2138	0	0
PPP1R1A	4295	4698	72	89	99	92.41	1.52	1.76	95.705	1.64	-5.8668	0	0
NCKAP1L	15421	18301	929	975	355.47	359.97	19.55	19.31	357.72	19.43	-4.2025	0	0
CBX5	13647	16962	1028	1137	314.58	333.63	21.63	22.52	324.105	22.075	-3.876	0	0
SP7	6588	7445	86	107	151.86	146.44	1.81	2.12	149.15	1.965	-6.2461	0	0
ESPL1	8548	9565	1286	1465	197.04	188.14	27.06	29.02	192.59	28.04	-2.78	0	0
KRT8	660	748	7030	7218	15.21	14.71	147.94	142.97	14.96	145.455	3.2814	0	0
KRT7	549	651	31701	32943	12.66	12.8	667.13	652.51	12.73	659.82	5.6958	0	0
FAIM2	1300	1524	14902	14794	29.97	29.98	313.61	293.03	29.975	303.32	3.339	0	0
RACGAP1	8261	9616	350	440	190.43	189.14	7.37	8.72	189.785	8.045	-4.5601	0	0
ALOX5AP	10222	11818	672	639	235.63	232.45	14.14	12.66	234.04	13.4	-4.1265	0	0
SHISA2	797	1048	10841	11337	18.37	20.61	228.14	224.55	19.49	226.345	3.5377	0	0
PDGFD	1150	1396	9600	10592	26.51	27.46	202.03	209.8	26.985	205.915	2.9318	0	0
AMOTL1	8197	9720	2365	2463	188.95	191.19	49.77	48.79	190.07	49.28	-1.9475	0	0
RRM1	18599	22013	7007	7529	428.73	432.98	147.46	149.13	430.855	148.295	-1.5387	0	0
RHOG	10080	11974	701	771	232.36	235.52	14.75	15.27	233.94	15.01	-3.9621	0	0
STARD10	5108	6340	23080	23629	117.75	124.7	485.71	468.02	121.225	476.865	1.9759	0	0
PDE2A	17694	20318	306	277	407.87	399.64	6.44	5.49	403.755	5.965	-6.0808	0	0
RELT	3963	4595	341	374	91.35	90.38	7.18	7.41	90.865	7.295	-3.6387	0	0
PICALM	20835	24368	6068	7045	480.27	479.3	127.7	139.54	479.785	133.62	-1.8443	0	0
TRIM3	2266	2596	17004	17412	52.23	51.06	357.84	344.88	51.645	351.36	2.7662	0	0
SON	36515	41903	19165	20638	841.71	824.21	403.32	408.78	832.96	406.05	-1.0366	0	0
RCSD1	10376	11814	963	931	239.18	232.37	20.27	18.44	235.775	19.355	-3.6066	0	0
GDPD1	281	366	5278	5634	6.48	7.2	111.07	111.59	6.84	111.33	4.0247	0	0
DHRS11	13803	16396	361	418	318.17	322.5	7.6	8.28	320.335	7.94	-5.3343	0	0
GPR37L1	673	779	10140	10341	15.51	15.32	213.39	204.83	15.415	209.11	3.7619	0	0
CLSPN	6063	6936	302	263	139.76	136.43	6.36	5.21	138.095	5.785	-4.5772	0	0
MMP13	7337	8420	88	90	169.13	165.62	1.85	1.78	167.375	1.815	-6.527	0	0
C2CD3	5866	6799	943	1040	135.22	133.73	19.85	20.6	134.475	20.225	-2.7331	0	0
CMAS	7457	8433	1585	1686	171.89	165.87	33.36	33.39	168.88	33.375	-2.3392	0	0
PKP2	231	249	4680	4816	5.32	4.9	98.49	95.39	5.11	96.94	4.2457	0	0
PARVB	13157	15113	474	579	303.28	297.26	9.98	11.47	300.27	10.725	-4.8072	0	0
DENND2A	790	1081	9470	10403	18.21	21.26	199.29	206.05	19.735	202.67	3.3603	0	0
CREB3L2	5614	6844	43525	47202	129.41	134.62	915.96	934.94	132.015	925.45	2.8095	0	0
WNK1	35663	42770	12853	13388	822.07	841.26	270.49	265.18	831.665	267.835	-1.6347	0	0
B4GALNT3	2367	2790	17035	17989	54.56	54.88	358.49	356.31	54.72	357.4	2.7074	0	0
TMTC1	1231	1524	13830	14631	28.38	29.98	291.05	289.8	29.18	290.425	3.3151	0	0
LDHB	10438	12661	47440	49655	240.61	249.03	998.35	983.53	244.82	990.94	2.0171	0	0
SPARC	240735	284230	126788	134716	5549.21	5590.63	2668.2	2668.35	5569.92	2668.28	-1.0617	0	0
KCNA6	276	304	4860	4885	6.36	5.98	102.28	96.76	6.17	99.52	4.0116	0	0
VWF	20476	24302	4791	5411	472	478.01	100.82	107.18	475.005	104	-2.1914	0	0
BPGM	30029	35561	4274	4591	692.2	699.46	89.94	90.93	695.83	90.435	-2.9438	0	0
SGCD	1280	1493	9341	9791	29.51	29.37	196.58	193.93	29.44	195.255	2.7295	0	0
TNIP1	3346	4091	26541	26946	77.13	80.47	558.54	533.73	78.8	546.135	2.793	0	0
CXCL14	1009	1189	31620	32990	23.26	23.39	665.43	653.44	23.325	659.435	4.8213	0	0
HMMR	4515	4789	94	119	104.08	94.2	1.98	2.36	99.14	2.17	-5.5137	0	0
CYSTM1	1141	1173	10793	11156	26.3	23.07	227.13	220.97	24.685	224.05	3.1821	0	0
LCP2	4702	5596	413	466	108.39	110.07	8.69	9.23	109.23	8.96	-3.6077	0	0
DOCK2	12203	14537	666	689	281.29	285.93	14.02	13.65	283.61	13.835	-4.3575	0	0
SLC22A5	1383	1593	8565	9598	31.88	31.33	180.25	190.11	31.605	185.18	2.5507	0	0
SH3PXD2B	10411	12712	2154	2307	239.99	250.04	45.33	45.7	245.015	45.515	-2.4285	0	0
STK32A	63	72	11508	11526	1.45	1.42	242.18	228.3	1.435	235.24	7.3569	0	0
CFAP43	344	374	4766	5132	7.93	7.36	100.3	101.65	7.645	100.975	3.7233	0	0
GRK6	13359	15862	1149	1385	307.94	312	24.18	27.43	309.97	25.805	-3.5864	0	0
FAM193B	9335	10826	2719	2971	215.18	212.94	57.22	58.85	214.06	58.035	-1.883	0	0
RNF44	11081	12497	2450	2430	255.43	245.81	51.56	48.13	250.62	49.845	-2.33	0	0
CLTB	3156	3592	20340	21061	72.75	70.65	428.05	417.16	71.7	422.605	2.5593	0	0
KIF20A	6183	6948	380	380	142.53	136.66	8	7.53	139.595	7.765	-4.1681	0	0
STAB2	7668	8908	43	52	176.76	175.21	0.9	1.03	175.985	0.965	-7.5107	0	0
TMPO	19080	23472	3932	4246	439.82	461.68	82.75	84.1	450.75	83.425	-2.4338	0	0
OTOGL	996	1019	47175	51944	22.96	20.04	992.78	1028.87	21.5	1010.83	5.5551	0	0
PTPRQ	951	1190	11071	12396	21.92	23.41	232.98	245.53	22.665	239.255	3.4	0	0
DCN	17131	20244	47746	52886	394.89	398.19	1004.79	1047.52	396.54	1026.15	1.3717	0	0
NUDT4	14971	18354	1547	1512	345.1	361.01	32.56	29.95	353.055	31.255	-3.4977	0	0
METAP2	25039	29875	4745	5223	577.18	587.62	99.86	103.45	582.4	101.655	-2.5183	0	0
RPL18A	51718	62865	14932	16042	1192.16	1236.51	314.24	317.75	1214.34	315.995	-1.9422	0	0
PHLDA1	1510	1647	30717	31223	34.81	32.4	646.43	618.44	33.605	632.435	4.2342	0	0
CSRP2	990	1226	30716	32708	22.82	24.11	646.4	647.85	23.465	647.125	4.7855	0	0
ANO6	13358	15581	3691	3975	307.92	306.47	77.68	78.73	307.195	78.205	-1.9738	0	0
NELL2	425	574	6313	6891	9.8	11.29	132.85	136.49	10.545	134.67	3.6748	0	0
PTPRZ1	2228	2893	24640	26275	51.36	56.9	518.54	520.43	54.13	519.485	3.2626	0	0
ATP6AP1	16941	19713	4289	4696	390.51	387.74	90.26	93.01	389.125	91.635	-2.0863	0	0
CERK	14220	16517	2113	2327	327.79	324.88	44.47	46.09	326.335	45.28	-2.8494	0	0
KIF21A	1384	1583	21869	23760	31.9	31.14	460.22	470.62	31.52	465.42	3.8842	0	0
LAMB1	4027	4577	27773	28860	92.83	90.03	584.47	571.64	91.43	578.055	2.6605	0	0
PRKAR2B	6366	7994	415	409	146.74	157.24	8.73	8.1	151.99	8.415	-4.1749	0	0
FAM107B	10700	12548	3555	3771	246.65	246.81	74.81	74.69	246.73	74.75	-1.7228	0	0
MCM10	3493	3904	164	184	80.52	76.79	3.45	3.64	78.655	3.545	-4.4717	0	0
PROSER2	1214	1378	8529	9357	27.98	27.1	179.49	185.34	27.54	182.415	2.7276	0	0
CEP41	1047	1096	8671	9064	24.13	21.56	182.48	179.53	22.845	181.005	2.9861	0	0
AHCYL2	16092	19012	5195	5332	370.94	373.95	109.33	105.61	372.445	107.47	-1.7931	0	0
NCAPH2	13480	15276	481	479	310.73	300.47	10.12	9.49	305.6	9.805	-4.962	0	0
HCLS1	13684	15559	1766	1875	315.43	306.04	37.16	37.14	310.735	37.15	-3.0643	0	0
TSPAN3	5494	6505	35010	38004	126.64	127.95	736.77	752.75	127.295	744.76	2.5486	0	0
HERC1	28088	32959	10876	11546	647.46	648.28	228.88	228.69	647.87	228.785	-1.5017	0	0
TPM1	18222	20622	4857	5265	420.04	405.62	102.21	104.29	412.83	103.25	-1.9994	0	0
STRA6	275	358	4956	5594	6.34	7.04	104.3	110.8	6.69	107.55	4.0069	0	0
CSK	16514	19320	4513	4283	380.67	380.01	94.97	84.83	380.34	89.9	-2.0809	0	0
CLK3	10203	11974	2159	2252	235.19	235.52	45.44	44.61	235.355	45.025	-2.386	0	0
PPIB	8654	10072	27147	28627	199.48	198.11	571.3	567.02	198.795	569.16	1.5176	0	0
SNX22	5422	6550	190	229	124.98	128.83	4	4.54	126.905	4.27	-4.8934	0	0
KLF13	14643	17483	1121	1415	337.54	343.88	23.59	28.03	340.71	25.81	-3.7225	0	0
NEDD4	33744	39845	2152	2217	777.84	783.73	45.29	43.91	780.785	44.6	-4.1298	0	0
SCG3	225	272	9763	10454	5.19	5.35	205.46	207.06	5.27	206.26	5.2905	0	0
GLDN	577	587	9276	10129	13.3	11.55	195.21	200.63	12.425	197.92	3.9936	0	0
IL16	8082	9524	1828	1861	186.3	187.33	38.47	36.86	186.815	37.665	-2.3103	0	0
MAP1A	11480	13394	35655	37847	264.63	263.45	750.34	749.64	264.04	749.99	1.5061	0	0
FES	13862	15708	518	591	319.53	308.97	10.9	11.71	314.25	11.305	-4.7969	0	0
CEMIP	4092	4825	29718	31526	94.33	94.9	625.4	624.44	94.615	624.92	2.7235	0	0
ALDH1A3	1821	2125	34097	36098	41.98	41.8	717.56	715	41.89	716.28	4.0958	0	0
PCSK6	6152	7286	1131	1170	141.81	143.31	23.8	23.17	142.56	23.485	-2.6018	0	0
DPP8	11317	13681	2984	3060	260.87	269.1	62.8	60.61	264.985	61.705	-2.1025	0	0
DENND4A	14062	16826	4336	4781	324.15	330.96	91.25	94.7	327.555	92.975	-1.8168	0	0
ITGA11	3550	4047	15517	16235	81.83	79.6	326.55	321.57	80.715	324.06	2.0054	0	0
KIF23	5698	6421	228	214	131.35	126.3	4.8	4.24	128.825	4.52	-4.8329	0	0
TET3	9352	11250	1606	1783	215.57	221.28	33.8	35.32	218.425	34.56	-2.66	0	0
MOB1A	8663	10441	1633	1711	199.69	205.37	34.37	33.89	202.53	34.13	-2.569	0	0
ADD2	16769	19741	1054	1195	386.54	388.29	22.18	23.67	387.415	22.925	-4.0789	0	0
MXD1	14719	17210	890	964	339.29	338.51	18.73	19.09	338.9	18.91	-4.1636	0	0
PCNA	19353	21184	3262	3456	446.11	416.68	68.65	68.45	431.395	68.55	-2.6538	0	0
TMEM127	8331	9962	1071	1034	192.04	195.95	22.54	20.48	193.995	21.51	-3.1729	0	0
SLC20A1	7751	9585	1273	1391	178.67	188.53	26.79	27.55	183.6	27.17	-2.7565	0	0
RETSAT	1082	1356	8070	8761	24.94	26.67	169.83	173.53	25.805	171.68	2.734	0	0
SFRP1	793	891	12704	13530	18.28	17.53	267.35	267.99	17.905	267.67	3.902	0	0
LOXL2	8728	9817	1540	1527	201.19	193.09	32.41	30.25	197.14	31.33	-2.6536	0	0
SLC25A37	61289	73074	414	453	1412.78	1437.32	8.71	8.97	1425.05	8.84	-7.3328	0	0
NEFM	6244	7017	30251	30664	143.93	138.02	636.62	607.37	140.975	621.995	2.1415	0	0
DPYSL2	1196	1417	14067	14921	27.57	27.87	296.03	295.54	27.72	295.785	3.4155	0	0
XPO7	36482	44368	7248	7263	840.95	872.69	152.53	143.86	856.82	148.195	-2.5315	0	0
DMTN	15343	18041	3162	3335	353.67	354.86	66.54	66.06	354.265	66.3	-2.4177	0	0
ANK1	43564	51318	3715	3937	1004.2	1009.39	78.18	77.98	1006.79	78.08	-3.6887	0	0
PLEKHA2	10672	12349	856	1008	246	242.9	18.01	19.97	244.45	18.99	-3.6862	0	0
PRKACA	4623	5501	102	127	106.57	108.2	2.15	2.52	107.385	2.335	-5.5232	0	0
GMIP	7877	9458	1533	1718	181.57	186.03	32.26	34.03	183.8	33.145	-2.4713	0	0
DNMT1	31450	36199	4406	4408	724.96	712.01	92.72	87.31	718.485	90.015	-2.9967	0	0
SMARCA4	30013	35833	9857	10161	691.83	704.81	207.44	201.26	698.32	204.35	-1.7728	0	0
ACP5	28461	33451	747	661	656.06	657.96	15.72	13.09	657.01	14.405	-5.5113	0	0
C3	35202	40379	4508	4447	811.45	794.23	94.87	88.08	802.84	91.475	-3.1337	0	0
RNASEK	1493	1721	11713	11761	34.42	33.85	246.49	232.95	34.135	239.72	2.812	0	0
ACHE	9253	10786	2534	2548	213.29	212.15	53.33	50.47	212.72	51.9	-2.0351	0	0
AURKB	6928	7971	211	251	159.7	156.78	4.44	4.97	158.24	4.705	-5.0718	0	0
VAMP2	5159	5989	839	935	118.92	117.8	17.66	18.52	118.36	18.09	-2.7099	0	0
PARVG	8594	9938	424	468	198.1	195.47	8.92	9.27	196.785	9.095	-4.4354	0	0
NDUFB2	1252	1464	9446	10481	28.86	28.8	198.79	207.6	28.83	203.195	2.8172	0	0
FOXM1	7485	8359	324	340	172.54	164.42	6.82	6.73	168.48	6.775	-4.6362	0	0
CYFIP2	32156	36768	9646	10866	741.23	723.2	203	215.23	732.215	209.115	-1.808	0	0
ADAM19	5710	6480	444	398	131.62	127.46	9.34	7.88	129.54	8.61	-3.9112	0	0
PPP2CA	13159	15723	3619	4204	303.33	309.26	76.16	83.27	306.295	79.715	-1.942	0	0
GFPT1	3939	4715	15790	17198	90.8	92.74	332.29	340.64	91.77	336.465	1.8744	0	0
BBS4	553	644	5693	6217	12.75	12.67	119.81	123.14	12.71	121.475	3.2566	0	0
CD36	4543	5432	230	214	104.72	106.84	4.84	4.24	105.78	4.54	-4.5422	0	0
ABCB10	19640	23342	1573	1598	452.72	459.12	33.1	31.65	455.92	32.375	-3.8158	0	0
USH1C	1679	1774	13495	14800	38.7	34.89	284	293.15	36.795	288.575	2.9714	0	0
OTOG	12260	14310	36826	40500	282.61	281.47	774.99	802.19	282.04	788.59	1.4834	0	0
NUCB2	1423	1812	14038	15736	32.8	35.64	295.42	311.69	34.22	303.555	3.149	0	0
SOX6	7992	8830	672	576	184.22	173.68	14.14	11.41	178.95	12.775	-3.8082	0	0
SCUBE2	88	88	7656	8126	2.03	1.73	161.12	160.95	1.88	161.035	6.4205	0	0
E2F8	8611	9768	184	184	198.49	192.13	3.87	3.64	195.31	3.755	-5.7008	0	0
ANO5	152	190	5700	6209	3.5	3.74	119.95	122.98	3.62	121.465	5.0684	0	0
CD44	10442	12251	887	956	240.7	240.97	18.67	18.94	240.835	18.805	-3.6789	0	0
LRP4	16011	19158	5487	5841	369.07	376.83	115.47	115.69	372.95	115.58	-1.6901	0	0
ATG13	3438	4096	13855	14980	79.25	80.57	291.57	296.71	79.91	294.14	1.8801	0	0
DGKZ	21755	25107	6929	7319	501.48	493.84	145.82	144.97	497.66	145.395	-1.7752	0	0
CRY2	1906	2260	11932	12328	43.94	44.45	251.1	244.18	44.195	247.64	2.4863	0	0
LMO2	12778	15013	4798	5009	294.55	295.3	100.97	99.21	294.925	100.09	-1.5591	0	0
SPI1	8878	10253	890	796	204.65	201.67	18.73	15.77	203.16	17.25	-3.5579	0	0
INCENP	13540	15995	356	459	312.11	314.61	7.49	9.09	313.36	8.29	-5.2403	0	0
CPSF7	8978	10400	1347	1559	206.95	204.56	28.35	30.88	205.755	29.615	-2.7965	0	0
B4GALNT4	183	175	7604	8179	4.22	3.44	160.02	162	3.83	161.01	5.3937	0	0
FADS2	4270	4903	23263	24292	98.43	96.44	489.56	481.16	97.435	485.36	2.3165	0	0
FEN1	10035	12263	1283	1390	231.32	241.21	27	27.53	236.265	27.265	-3.1153	0	0
KCNQ1	837	1194	12185	12594	19.29	23.49	256.43	249.45	21.39	252.94	3.5638	0	0
CD151	6728	7387	31985	35074	155.09	145.3	673.11	694.72	150.195	683.915	2.187	0	0
CAPN1	11727	13530	2229	2180	270.32	266.13	46.91	43.18	268.225	45.045	-2.574	0	0
EPS8L2	2476	3054	19737	20278	57.07	60.07	415.36	401.65	58.57	408.505	2.8021	0	0
TALDO1	21487	25307	5002	5257	495.3	497.77	105.26	104.13	496.535	104.695	-2.2457	0	0
FRMD8	5542	6377	1123950	1238720	127.75	125.43	23653	24535.6	126.59	24094.3	7.5724	0	0
MTA2	15627	18281	4300	4449	360.22	359.58	90.49	88.12	359.9	89.305	-2.0108	0	0
GANAB	18040	20124	3171	3098	415.84	395.83	66.73	61.36	405.835	64.045	-2.6637	0	0
LRP5	13490	15801	4421	4532	310.96	310.8	93.04	89.77	310.88	91.405	-1.766	0	0
EHBP1L1	24689	29590	826	890	569.11	582.02	17.38	17.63	575.565	17.505	-5.0391	0	0
SIPA1	16310	18684	417	402	375.96	367.5	8.78	7.96	371.73	8.37	-5.4729	0	0
MPP1	12145	14090	3703	3718	279.96	277.14	77.93	73.64	278.55	75.785	-1.878	0	0
FTO	5111	5810	189	186	117.81	114.28	3.98	3.68	116.045	3.83	-4.9212	0	0
ADCY7	11178	13648	2019	2263	257.67	268.45	42.49	44.82	263.06	43.655	-2.5912	0	0
SMPD3	12956	14486	563	729	298.65	284.93	11.85	14.44	291.79	13.145	-4.4723	0	0
SALL1	343	344	8107	8507	7.91	6.77	170.61	168.5	7.34	169.555	4.5298	0	0
CMIP	8830	10314	1875	1916	203.54	202.87	39.46	37.95	203.205	38.705	-2.3923	0	0
PIEZO1	16454	18892	2705	2772	379.28	371.59	56.93	54.91	375.435	55.92	-2.7471	0	0
CDT1	7286	8628	759	753	167.95	169.71	15.97	14.91	168.83	15.44	-3.4508	0	0
RPL13	54716	63700	28683	29621	1261.27	1252.94	603.62	586.71	1257.11	595.165	-1.0787	0	0
TCF25	16812	20039	5650	5796	387.54	394.15	118.9	114.8	390.845	116.85	-1.7419	0	0
CDH3	179	259	20257	20776	4.13	5.09	426.3	411.51	4.61	418.905	6.5057	0	0
PLCG2	13615	16231	618	713	313.84	319.25	13.01	14.12	316.545	13.565	-4.5444	0	0
GSE1	15249	18005	1918	2007	351.51	354.15	40.36	39.75	352.83	40.055	-3.1389	0	0
ZFPM1	19261	22905	3074	3169	443.99	450.53	64.69	62.77	447.26	63.73	-2.8111	0	0
CYBA	11204	13460	3745	4005	258.26	264.75	78.81	79.33	261.505	79.07	-1.7256	0	0
GPT2	1017	1068	16559	17569	23.44	21.01	348.48	347.99	22.225	348.235	3.9698	0	0
PLEKHG4	65	110	9734	10254	1.5	2.16	204.85	203.1	1.83	203.975	6.8004	0	0
RFWD3	8704	10269	1777	1696	200.64	201.98	37.4	33.59	201.31	35.495	-2.5037	0	0
CALB2	6860	7718	28664	29109	158.13	151.81	603.22	576.57	154.97	589.895	1.9285	0	0
MMP15	1775	2026	16465	17229	40.92	39.85	346.5	341.26	40.385	343.88	3.09	0	0
E2F4	13402	16452	2272	2290	308.93	323.6	47.81	45.36	316.265	46.585	-2.7632	0	0
LCAT	1489	1909	29224	30321	34.32	37.55	615.01	600.57	35.935	607.79	4.0801	0	0
DDAH1	555	650	7845	8519	12.79	12.79	165.09	168.74	12.79	166.915	3.706	0	0
SLC44A5	16	28	9293	10609	0.37	0.55	195.57	210.13	0.46	202.85	8.7846	0	0
WLS	5631	7061	22488	23884	129.8	138.89	473.25	473.08	134.345	473.165	1.8164	0	0
AK4	270	380	5252	5604	6.22	7.47	110.53	111	6.845	110.765	4.0163	0	0
ROR1	274	303	4573	5083	6.32	5.96	96.24	100.68	6.14	98.46	4.0032	0	0
PGM1	1214	1416	15135	15379	27.98	27.85	318.51	304.62	27.915	311.565	3.4804	0	0
JUN	2173	2522	18522	17959	50.09	49.61	389.79	355.72	49.85	372.755	2.9026	0	0
CDC20	8551	10366	187	195	197.11	203.89	3.94	3.86	200.5	3.9	-5.684	0	0
AKR1A1	20559	24166	6162	6258	473.91	475.33	129.68	123.95	474.62	126.815	-1.904	0	0
UROD	14467	16688	1128	1214	333.48	328.24	23.74	24.05	330.86	23.895	-3.7914	0	0
KIF2C	3255	3885	133	130	75.03	76.42	2.8	2.57	75.725	2.685	-4.8178	0	0
PIK3R3	658	907	7551	8025	15.17	17.84	158.91	158.95	16.505	158.93	3.2674	0	0
TSPAN1	156	172	4177	4183	3.6	3.38	87.9	82.85	3.49	85.375	4.6125	0	0
TAL1	14731	17647	621	662	339.57	347.11	13.07	13.11	343.34	13.09	-4.7131	0	0
CDCP2	140	129	4765	4938	3.23	2.54	100.28	97.81	2.885	99.045	5.1014	0	0
NCF2	9553	10945	451	462	220.21	215.28	9.49	9.15	217.745	9.32	-4.5462	0	0
CACNA1E	7589	8812	1097	1132	174.94	173.33	23.09	22.42	174.135	22.755	-2.936	0	0
QSOX1	5565	6406	27573	27189	128.28	126	580.26	538.54	127.14	559.4	2.1375	0	0
MYOC	188	206	15398	16083	4.33	4.05	324.04	318.56	4.19	321.3	6.2608	0	0
PBX1	4138	4659	20108	21079	95.39	91.64	423.16	417.52	93.515	420.34	2.1683	0	0
LMX1A	589	697	10130	10686	13.58	13.71	213.18	211.66	13.645	212.42	3.9605	0	0
VCAM1	14162	16408	2315	2473	326.45	322.74	48.72	48.98	324.595	48.85	-2.7322	0	0
PTPRC	15980	18993	1421	1700	368.36	373.58	29.9	33.67	370.97	31.785	-3.5449	0	0
KIF14	3688	4345	158	200	85.01	85.46	3.33	3.96	85.235	3.645	-4.5475	0	0
FNDC7	888	1213	14666	15829	20.47	23.86	308.64	313.53	22.165	311.085	3.811	0	0
CFH	18795	23558	4396	5164	433.25	463.37	92.51	102.28	448.31	97.395	-2.2026	0	0
MYH9	97759	113240	27246	28481	2253.46	2227.36	573.38	564.13	2240.41	568.755	-1.9779	0	0
HMOX1	13159	14556	948	956	303.33	286.31	19.95	18.94	294.82	19.445	-3.9224	0	0
MCM5	24872	29171	925	934	573.33	573.78	19.47	18.5	573.555	18.985	-4.917	0	0
EP300	16556	19595	7170	7559	381.63	385.42	150.89	149.72	383.525	150.305	-1.3514	0	0
HMCN1	1505	1730	9681	10118	34.69	34.03	203.73	200.41	34.36	202.07	2.5561	0	0
SUN2	27684	32263	10203	10365	638.15	634.59	214.72	205.3	636.37	210.01	-1.5994	0	0
DDX17	53983	63672	29938	32115	1244.37	1252.39	630.03	636.11	1248.38	633.07	-0.9796	0	0
CBX7	1317	1321	16906	18060	30.36	25.98	355.78	357.72	28.17	356.75	3.6627	0	0
SYNGR1	3009	3398	21957	23525	69.36	66.84	462.07	465.96	68.1	464.015	2.7684	0	0
MGAT3	2697	2918	19724	20010	62.17	57.4	415.08	396.34	59.785	405.71	2.7626	0	0
RANGAP1	12636	14435	2471	2710	291.27	283.93	52	53.68	287.6	52.84	-2.4444	0	0
SOX10	2573	2901	32125	32739	59.31	57.06	676.06	648.47	58.185	662.265	3.5087	0	0
CYTH4	8962	10075	427	541	206.58	198.17	8.99	10.72	202.375	9.855	-4.36	0	0
RAC2	35223	41327	940	1009	811.93	812.88	19.78	19.99	812.405	19.885	-5.3524	0	0
CSF2RB	8128	9538	192	193	187.36	187.61	4.04	3.82	187.485	3.93	-5.5761	0	0
NCF4	6139	6797	301	237	141.51	133.69	6.33	4.69	137.6	5.51	-4.6423	0	0
PRKCD	15936	18599	4256	4751	367.34	365.83	89.57	94.1	366.585	91.835	-1.997	0	0
ECM2	694	714	9414	11023	16	14.04	198.11	218.33	15.02	208.22	3.7932	0	0
GPX1	89498	103069	11484	12450	2063.03	2027.3	241.68	246.6	2045.16	244.14	-3.0664	0	0
RNF123	24734	28381	4292	4387	570.15	558.24	90.32	86.89	564.195	88.605	-2.6707	0	0
IP6K1	18822	21508	6650	7185	433.87	423.05	139.95	142.31	428.46	141.13	-1.6021	0	0
SLC38A3	682	760	6861	7145	15.72	14.95	144.39	141.52	15.335	142.955	3.2207	0	0
GNAI2	46113	53531	15690	16722	1062.96	1052.92	330.19	331.22	1057.94	330.705	-1.6776	0	0
SEMA3B	2642	3265	15833	16064	60.9	64.22	333.2	318.18	62.56	325.69	2.3802	0	0
DOCK3	445	451	14118	15046	10.26	8.87	297.11	298.02	9.565	297.565	4.9593	0	0
ARHGDIB	36498	42100	8956	8964	841.32	828.08	188.47	177.55	834.7	183.01	-2.1893	0	0
MCM2	25095	30138	1236	1281	578.47	592.8	26.01	25.37	585.635	25.69	-4.5107	0	0
WDR6	6764	7674	1078	1074	155.92	150.94	22.69	21.27	153.43	21.98	-2.8033	0	0
PIM1	8138	9715	563	546	187.59	191.09	11.85	10.81	189.34	11.33	-4.0628	0	0
IL17RC	656	757	11468	12457	15.12	14.89	241.34	246.74	15.005	244.04	4.0236	0	0
LRIG1	1272	1602	9116	9681	29.32	31.51	191.84	191.75	30.415	191.795	2.6567	0	0
FLNB	10836	12039	55115	57684	249.78	236.8	1159.87	1142.56	243.29	1151.21	2.2424	0	0
CACNA1D	1404	1861	11814	13272	32.36	36.6	248.62	262.88	34.48	255.75	2.8909	0	0
CHDH	4317	4954	123	142	99.51	97.44	2.59	2.81	98.475	2.7	-5.1887	0	0
PHF2	9683	10975	2558	2721	223.2	215.87	53.83	53.9	219.535	53.865	-2.027	0	0
NUP210	28211	32796	1276	1503	650.3	645.08	26.85	29.77	647.69	28.31	-4.5159	0	0
DDB1	28058	32570	7959	8397	646.77	640.63	167.49	166.32	643.7	166.905	-1.9474	0	0
HYDIN	438	517	7120	7856	10.1	10.17	149.84	155.61	10.135	152.725	3.9135	0	0
MKNK1	5742	6884	964	1040	132.36	135.4	20.29	20.6	133.88	20.445	-2.7111	0	0
RAB43	17761	20560	2885	3386	409.41	404.4	60.71	67.07	406.905	63.89	-2.671	0	0
NISCH	35126	40624	5698	6032	809.69	799.05	119.91	119.48	804.37	119.695	-2.7485	0	0
SPTBN1	27736	32410	107295	114710	639.35	637.48	2257.97	2272.09	638.415	2265.03	1.827	0	0
NRXN1	368	392	6186	6632	8.48	7.71	130.18	131.36	8.095	130.77	4.0139	0	0
EPCAM	2688	3556	20917	21796	61.96	69.94	440.19	431.72	65.95	435.955	2.7247	0	0
UBR2	11172	13009	3641	4035	257.53	255.88	76.62	79.92	256.705	78.27	-1.7136	0	0
DTL	3705	4438	261	254	85.4	87.29	5.49	5.03	86.345	5.26	-4.037	0	0
CENPF	7903	8967	93	98	182.17	176.38	1.96	1.94	179.275	1.95	-6.5226	0	0
USH2A	100	142	7021	7459	2.31	2.79	147.75	147.74	2.55	147.745	5.8565	0	0
WDR26	20740	24761	5079	5561	478.08	487.03	106.89	110.15	482.555	108.52	-2.1527	0	0
LBR	19511	23254	2615	2628	449.75	457.39	55.03	52.05	453.57	53.54	-3.0826	0	0
GTPBP2	20204	23658	2577	2699	465.73	465.34	54.23	53.46	465.535	53.845	-3.112	0	0
SLC29A1	12722	14585	3159	3150	293.26	286.88	66.48	62.39	290.07	64.435	-2.1705	0	0
CAPN11	427	474	14272	14653	9.84	9.32	300.35	290.24	9.58	295.295	4.946	0	0
PTK7	2535	2846	19696	20264	58.43	55.98	414.49	401.37	57.205	407.93	2.8341	0	0
KLHDC3	8504	10063	1452	1474	196.03	197.93	30.56	29.2	196.98	29.88	-2.7208	0	0
JAG1	1294	1434	29969	31470	29.83	28.21	630.68	623.33	29.02	627.005	4.4334	0	0
PLEK	15335	18519	1121	1102	353.49	364.26	23.59	21.83	358.875	22.71	-3.9821	0	0
EHBP1	672	961	11805	12092	15.49	18.9	248.43	239.51	17.195	243.97	3.8266	0	0
EFEMP1	1772	2219	13598	15237	40.85	43.65	286.16	301.8	42.25	293.98	2.7987	0	0
DSTN	8547	10410	26679	28498	197.02	204.76	561.45	564.47	200.89	562.96	1.4866	0	0
APMAP	2769	3030	17249	18807	63.83	59.6	363	372.51	61.715	367.755	2.5751	0	0
TMEM87B	1705	2193	12215	13087	39.3	43.13	257.06	259.22	41.215	258.14	2.6469	0	0
TTL	1239	1284	9569	9950	28.56	25.26	201.38	197.08	26.91	199.23	2.8882	0	0
RRBP1	17008	19263	5678	5755	392.05	378.89	119.49	113.99	385.47	116.74	-1.7233	0	0
HEBP2	776	1057	35112	37665	17.89	20.79	738.92	746.04	19.34	742.48	5.2627	0	0
PLEKHG1	1551	1887	9942	10863	35.75	37.12	209.22	215.17	36.435	212.195	2.542	0	0
STX11	4243	4607	328	350	97.81	90.62	6.9	6.93	94.215	6.915	-3.7682	0	0
SYNE1	27105	31202	8129	8822	624.8	613.72	171.07	174.74	619.26	172.905	-1.8406	0	0
SCCPDH	1101	1350	56799	61053	25.38	26.55	1195.31	1209.29	25.965	1202.3	5.5331	0	0
ACTA1	13504	15183	336	348	311.28	298.64	7.07	6.89	304.96	6.98	-5.4492	0	0
CITED2	6975	8165	1183	1264	160.78	160.6	24.9	25.04	160.69	24.97	-2.686	0	0
SLC16A10	7298	8876	661	701	168.23	174.59	13.91	13.88	171.41	13.895	-3.6248	0	0
FOXO3	17344	20847	2481	2617	399.8	410.05	52.21	51.84	404.925	52.025	-2.9604	0	0
IRF6	597	816	10345	10366	13.76	16.05	217.71	205.32	14.905	211.515	3.8269	0	0
B3GAT2	327	433	9402	9349	7.54	8.52	197.86	185.18	8.03	191.52	4.576	0	0
COL9A1	1286	1548	40539	42226	29.64	30.45	853.12	836.38	30.045	844.75	4.8133	0	0
PTP4A1	971	1120	12171	13223	22.38	22.03	256.13	261.91	22.205	259.02	3.5441	0	0
MLIP	620	683	6130	6524	14.29	13.43	129	129.22	13.86	129.11	3.2196	0	0
EPHB3	744	908	7178	7313	17.15	17.86	151.06	144.85	17.505	147.955	3.0793	0	0
EIF4G1	34320	39978	14917	15537	791.11	786.34	313.92	307.74	788.725	310.83	-1.3434	0	0
PTMA	85491	98470	6778	7764	1970.66	1936.84	142.64	153.78	1953.75	148.21	-3.7205	0	0
TNK2	12740	15142	4004	4549	293.67	297.83	84.26	90.1	295.75	87.18	-1.7623	0	0
TFRC	22401	26362	5705	6241	516.37	518.52	120.06	123.62	517.445	121.84	-2.0864	0	0
CLDN1	542	720	31896	34087	12.49	14.16	671.24	675.17	13.325	673.205	5.6588	0	0
IL1RAP	978	1100	7942	8269	22.54	21.64	167.14	163.79	22.09	165.465	2.9051	0	0
EIF4A2	13970	16749	66028	74402	322.02	329.44	1389.53	1473.7	325.73	1431.62	2.1359	0	0
ATP13A4	86	104	4542	4496	1.98	2.05	95.58	89.05	2.015	92.315	5.5177	0	0
ATP13A5	395	521	8950	9498	9.11	10.25	188.35	188.13	9.68	188.24	4.2814	0	0
SOX2	322	428	5172	5316	7.42	8.42	108.84	105.3	7.92	107.07	3.7569	0	0
GNB4	1330	1497	8949	10208	30.66	29.45	188.33	202.19	30.055	195.26	2.6997	0	0
EIF5A	15361	18418	5829	6085	354.09	362.27	122.67	120.53	358.18	121.6	-1.5585	0	0
SLC7A14	650	913	11920	12654	14.98	17.96	250.85	250.64	16.47	250.745	3.9283	0	0
OTOL1	229	212	42255	43769	5.28	4.17	889.24	866.94	4.725	878.09	7.5379	0	0
SMC4	10982	12624	295	311	253.15	248.31	6.21	6.16	250.73	6.185	-5.3412	0	0
PTX3	626	717	8271	8911	14.43	14.1	174.06	176.5	14.265	175.28	3.6191	0	0
KCNAB1	239	286	5332	6063	5.51	5.63	112.21	120.09	5.57	116.15	4.3822	0	0
MBNL1	19498	24044	5818	6357	449.45	472.93	122.44	125.91	461.19	124.175	-1.893	0	0
PFN2	1579	1945	9560	10099	36.4	38.26	201.19	200.03	37.33	200.61	2.426	0	0
RNF13	2805	3477	16855	18891	64.66	68.39	354.71	374.18	66.525	364.445	2.4537	0	0
CP	12083	14767	1110	1167	278.53	290.46	23.36	23.12	284.495	23.24	-3.6137	0	0
DGKD	17652	20987	5287	5765	406.9	412.8	111.26	114.19	409.85	112.725	-1.8623	0	0
KIF1A	5517	6554	23953	24500	127.17	128.91	504.08	485.28	128.04	494.68	1.9499	0	0
EFHD1	1557	1733	24444	25911	35.89	34.09	514.41	513.22	34.99	513.815	3.8762	0	0
INPP5D	12774	14820	1828	2035	294.46	291.5	38.47	40.31	292.98	39.39	-2.8949	0	0
PLEKHB2	3871	4857	20868	21872	89.23	95.53	439.16	433.22	92.38	436.19	2.2393	0	0
KLHL6	6684	7828	240	261	154.07	153.97	5.05	5.17	154.02	5.11	-4.9137	0	0
PER2	1632	1815	12105	12664	37.62	35.7	254.74	250.84	36.66	252.79	2.7857	0	0
DNER	2142	2700	15360	17070	49.38	53.11	323.24	338.11	51.245	330.675	2.6899	0	0
TFDP2	15317	17486	1033	1108	353.07	343.94	21.74	21.95	348.505	21.845	-3.9958	0	0
NRROS	6712	7652	298	329	154.72	150.51	6.27	6.52	152.615	6.395	-4.5768	0	0
HS6ST1	10325	11951	947	1007	238	235.07	19.93	19.95	236.535	19.94	-3.5683	0	0
RSAD2	14092	17108	3279	3677	324.84	336.5	69.01	72.83	330.67	70.92	-2.2211	0	0
MFSD2B	12165	14748	39	61	280.42	290.08	0.82	1.21	285.25	1.015	-8.1346	0	0
RCAN2	1004	1330	10615	11354	23.14	26.16	223.39	224.89	24.65	224.14	3.1847	0	0
CLIC5	871	1041	31701	33242	20.08	20.48	667.13	658.43	20.28	662.78	5.0304	0	0
RUNX2	4579	5327	378	393	105.55	104.78	7.95	7.78	105.165	7.865	-3.7411	0	0
RHAG	9002	11129	30	34	207.51	218.9	0.63	0.67	213.205	0.65	-8.3576	0	0
BLK	3922	4639	276	275	90.41	91.25	5.81	5.45	90.83	5.63	-4.012	0	0
PTK2B	9278	10987	623	766	213.87	216.11	13.11	15.17	214.99	14.14	-3.9264	0	0
OTOF	2813	3201	123249	129151	64.84	62.96	2593.72	2558.12	63.9	2575.92	5.3331	0	0
CLU	30101	35136	206636	213590	693.86	691.1	4348.56	4230.62	692.48	4289.59	2.631	0	0
EMILIN1	9614	11089	2078	2035	221.61	218.11	43.73	40.31	219.86	42.02	-2.3874	0	0
PPM1G	12260	14254	3436	3457	282.61	280.37	72.31	68.47	281.49	70.39	-1.9996	0	0
HSP90AB1	81233	92695	2322	2544	1872.51	1823.25	48.87	50.39	1847.88	49.63	-5.2185	0	0
ANAPC1	12449	14563	2845	2883	286.96	286.45	59.87	57.1	286.705	58.485	-2.2934	0	0
EGLN1	2696	3263	15458	16744	62.15	64.18	325.31	331.65	63.165	328.48	2.3786	0	0
RARRES2	811	1050	14221	13746	18.69	20.65	299.27	272.27	19.67	285.77	3.8608	0	0
MAP4	10263	12049	27792	29638	236.57	237	584.87	587.05	236.785	585.96	1.3072	0	0
ARF5	9257	11439	2038	2177	213.38	225	42.89	43.12	219.19	43.005	-2.3496	0	0
HHATL	8436	9525	52656	56013	194.46	187.35	1108.12	1109.46	190.905	1108.79	2.5381	0	0
AQP1	66046	77452	863	960	1522.44	1523.43	18.16	19.01	1522.93	18.585	-6.3566	0	0
VILL	1920	2315	17914	18380	44.26	45.53	376.99	364.06	44.895	370.525	3.0449	0	0
PAXIP1	7455	8680	853	922	171.85	170.73	17.95	18.26	171.29	18.105	-3.242	0	0
NCAPG2	7087	8501	45	61	163.36	167.21	0.95	1.21	165.285	1.08	-7.2578	0	0
OTUD1	1116	1418	8304	8920	25.73	27.89	174.75	176.68	26.81	175.715	2.7124	0	0
TFPI2	75	64	6349	7044	1.73	1.26	133.61	139.52	1.495	136.565	6.5133	0	0
COL1A2	730500	842951	63385	67323	16838.8	16580.3	1333.91	1333.48	16709.6	1333.69	-3.6472	0	0
C1GALT1	2141	2565	13053	14004	49.35	50.45	274.69	277.38	49.9	276.035	2.4677	0	0
TSPAN13	3581	4275	22155	24879	82.55	84.09	466.24	492.78	83.32	479.51	2.5248	0	0
AGR3	172	232	51874	56695	3.96	4.56	1091.66	1122.97	4.26	1107.32	8.022	0	0
ITGB8	528	571	11897	13379	12.17	11.23	250.37	265	11.7	257.685	4.461	0	0
TGFBR2	12556	15351	3043	3235	289.43	301.94	64.04	64.08	295.685	64.06	-2.2066	0	0
GADL1	32	22	7577	7952	0.74	0.43	159.45	157.51	0.585	158.48	8.0816	0	0
CMTM7	7737	8885	1307	1215	178.35	174.76	27.51	24.07	176.555	25.79	-2.7752	0	0
TOPBP1	9857	11322	1290	1350	227.22	222.7	27.15	26.74	224.96	26.945	-3.0616	0	0
NPHP3	796	919	6494	7325	18.35	18.08	136.66	145.09	18.215	140.875	2.9512	0	0
CLEC3B	114	118	20676	22505	2.63	2.32	435.12	445.76	2.475	440.44	7.4754	0	0
EZH2	6913	8223	505	574	159.35	161.74	10.63	11.37	160.545	11	-3.8674	0	0
EGFR	1460	1617	9870	10756	33.65	31.81	207.71	213.05	32.73	210.38	2.6843	0	0
VOPP1	7526	9365	345	324	173.48	184.2	7.26	6.42	178.84	6.84	-4.7085	0	0
IKZF1	20234	24124	344	378	466.42	474.5	7.24	7.49	470.46	7.365	-5.9972	0	0
FIGNL1	3904	4375	207	236	89.99	86.05	4.36	4.67	88.02	4.515	-4.285	0	0
TRANK1	53	58	5411	5978	1.22	1.14	113.87	118.41	1.18	116.14	6.6209	0	0
ANLN	4872	5764	108	120	112.31	113.37	2.27	2.38	112.84	2.325	-5.6009	0	0
BAG1	5774	6576	458	466	133.1	129.35	9.64	9.23	131.225	9.435	-3.7979	0	0
UBE2QL1	427	529	5319	5507	9.84	10.41	111.94	109.08	10.125	110.51	3.4482	0	0
RNF152	1218	1618	10596	11527	28.08	31.83	222.99	228.32	29.955	225.655	2.9133	0	0
TUBB2B	2104	2667	11663	12645	48.5	52.46	245.44	250.46	50.48	247.95	2.2963	0	0
F13A1	11207	12899	755	728	258.33	253.72	15.89	14.42	256.025	15.155	-4.0784	0	0
DSP	1111	1333	24100	25267	25.61	26.22	507.17	500.47	25.915	503.82	4.281	0	0
TMEM14C	10413	12241	1367	1640	240.03	240.77	28.77	32.48	240.4	30.625	-2.9727	0	0
RBM24	488	605	5511	5892	11.25	11.9	115.98	116.7	11.575	116.34	3.3293	0	0
DEK	10545	12997	1497	1646	243.07	255.64	31.5	32.6	249.355	32.05	-2.9598	0	0
ID4	571	736	16133	16995	13.16	14.48	339.51	336.62	13.82	338.065	4.6125	0	0
MRS2	5312	6405	489	584	122.45	125.98	10.29	11.57	124.215	10.93	-3.5065	0	0
KCNG2	112	151	5075	5531	2.58	2.97	106.8	109.55	2.775	108.175	5.2847	0	0
SALL3	104	104	6782	7848	2.4	2.05	142.72	155.45	2.225	149.085	6.0662	0	0
MBP	22188	25006	60946	66435	511.46	491.85	1282.58	1315.89	501.655	1299.23	1.3729	0	0
CEP192	4397	5341	604	637	101.36	105.05	12.71	12.62	103.205	12.665	-3.0266	0	0
SPIRE1	6923	8358	23050	24485	159.58	164.4	485.08	484.98	161.99	485.03	1.5822	0	0
APCDD1	1346	1790	13269	14014	31.03	35.21	279.24	277.58	33.12	278.41	3.0714	0	0
MYOM1	4197	4860	69	99	96.75	95.59	1.45	1.96	96.17	1.705	-5.8177	0	0
LPIN2	9145	10660	1950	1906	210.8	209.68	41.04	37.75	210.24	39.395	-2.416	0	0
EMILIN2	9421	11090	1332	1331	217.16	218.13	28.03	26.36	217.645	27.195	-3.0006	0	0
YES1	379	513	6047	6507	8.74	10.09	127.26	128.89	9.415	128.075	3.7659	0	0
RIOK3	8352	10357	1897	2107	192.52	203.72	39.92	41.73	198.12	40.825	-2.2788	0	0
OSBPL1A	2391	2708	18016	19616	55.12	53.26	379.14	388.54	54.19	383.84	2.8244	0	0
DSG2	351	395	11069	12082	8.09	7.77	232.94	239.31	7.93	236.125	4.8961	0	0
MCM4	11977	14222	717	817	276.08	279.74	15.09	16.18	277.91	15.635	-4.1518	0	0
CYP7B1	65	64	4683	4983	1.5	1.26	98.55	98.7	1.38	98.625	6.1592	0	0
HEY1	600	738	8212	8543	13.83	14.52	172.82	169.21	14.175	171.015	3.5927	0	0
CALB1	144	156	24881	29148	3.32	3.07	523.61	577.34	3.195	550.475	7.4287	0	0
NECAB1	34	43	9856	10319	0.78	0.85	207.41	204.39	0.815	205.9	7.9809	0	0
SDC2	2706	3168	17882	19519	62.38	62.31	376.32	386.62	62.345	381.47	2.6132	0	0
PABPC1	72740	85000	31412	33207	1676.74	1671.9	661.05	657.74	1674.32	659.395	-1.3444	0	0
NCALD	505	645	5589	6143	11.64	12.69	117.62	121.68	12.165	119.65	3.298	0	0
RAD21	19226	21679	7138	7528	443.18	426.41	150.22	149.11	434.795	149.665	-1.5386	0	0
SAMD12	182	271	5775	6111	4.2	5.33	121.53	121.04	4.765	121.285	4.6698	0	0
CCN3	469	519	7458	8421	10.81	10.21	156.95	166.8	10.51	161.875	3.945	0	0
COL14A1	3086	3294	30431	32942	71.14	64.79	640.41	652.49	67.965	646.45	3.2497	0	0
SNTB1	1438	1449	20277	21261	33.15	28.5	426.72	421.12	30.825	423.92	3.7816	0	0
FBXO32	1137	1331	13173	14301	26.21	26.18	277.22	283.26	26.195	280.24	3.4193	0	0
ASAP1	13334	16162	2648	3163	307.36	317.9	55.73	62.65	312.63	59.19	-2.401	0	0
SLA	8910	10812	294	246	205.39	212.67	6.19	4.87	209.03	5.53	-5.2403	0	0
ST3GAL1	11130	13518	3173	3379	256.56	265.89	66.77	66.93	261.225	66.85	-1.9663	0	0
COL22A1	13001	14652	611	528	299.69	288.2	12.86	10.46	293.945	11.66	-4.6559	0	0
AGO2	16302	19077	2063	2379	375.78	375.23	43.41	47.12	375.505	45.265	-3.0524	0	0
RPLP1	52483	61614	29565	31047	1209.79	1211.91	622.18	614.95	1210.85	618.565	-0.969	0	0
PTP4A3	22097	26596	1536	1542	509.36	523.13	32.32	30.54	516.245	31.43	-4.0378	0	0
GPAA1	3857	4814	404	432	88.91	94.69	8.5	8.56	91.8	8.53	-3.4279	0	0
EEF1D	8727	10383	28389	29856	201.17	204.23	597.43	591.36	202.7	594.395	1.5521	0	0
CPSF1	8917	10569	1740	1698	205.55	207.89	36.62	33.63	206.72	35.125	-2.5571	0	0
PTPRN2	151	168	9499	10039	3.48	3.3	199.9	198.84	3.39	199.37	5.878	0	0
LPCAT1	9847	11019	2196	2282	226.98	216.74	46.21	45.2	221.86	45.705	-2.2792	0	0
TXNL4A	6541	7888	927	1017	150.78	155.15	19.51	20.14	152.965	19.825	-2.9478	0	0
NANOS1	332	342	12553	12730	7.65	6.73	264.17	252.15	7.19	258.16	5.1661	0	0
EMG1	4207	5312	381	439	96.98	104.48	8.02	8.7	100.73	8.36	-3.5908	0	0
PTPN6	16309	18585	1606	1804	375.94	365.56	33.8	35.73	370.75	34.765	-3.4147	0	0
GAPDH	12412	14584	195803	203737	286.11	286.86	4120.58	4035.46	286.485	4078.02	3.8313	0	0
CHD4	32844	37539	16922	18058	757.09	738.37	356.12	357.68	747.73	356.9	-1.067	0	0
CDCA3	6928	8169	73	69	159.7	160.68	1.54	1.37	160.19	1.455	-6.7826	0	0
CISD1	1554	1567	11989	13332	35.82	30.82	252.3	264.07	33.32	258.185	2.9539	0	0
ANK3	2646	3153	13672	14561	60.99	62.02	287.72	288.41	61.505	288.065	2.2276	0	0
CDK1	5666	6588	243	331	130.61	129.58	5.11	6.56	130.095	5.835	-4.4787	0	0
HTRA1	2616	3116	26337	28477	60.3	61.29	554.25	564.05	60.795	559.15	3.2012	0	0
HMX3	269	354	5728	5786	6.2	6.96	120.54	114.6	6.58	117.57	4.1593	0	0
STK32C	60	62	9776	10220	1.38	1.22	205.73	202.43	1.3	204.08	7.2945	0	0
MKI67	91931	104120	238	264	2119.11	2047.97	5.01	5.23	2083.54	5.12	-8.6687	0	0
UROS	6135	7159	567	702	141.42	140.81	11.93	13.9	141.115	12.915	-3.4498	0	0
SFR1	3566	4318	211	242	82.2	84.93	4.44	4.79	83.565	4.615	-4.1785	0	0
SUFU	3093	3606	12626	13585	71.3	70.93	265.71	269.08	71.115	267.395	1.9107	0	0
PDZD7	367	451	5706	5880	8.46	8.87	120.08	116.47	8.665	118.275	3.7708	0	0
SLIT1	489	472	7869	7814	11.27	9.28	165.6	154.77	10.275	160.185	3.9625	0	0
ARHGAP19	10001	12167	2189	2394	230.53	239.32	46.07	47.42	234.925	46.745	-2.3293	0	0
PGAM1	7780	8961	45440	46695	179.34	176.26	956.26	924.9	177.8	940.58	2.4033	0	0
ZMAT4	79	63	5496	5457	1.82	1.24	115.66	108.09	1.53	111.875	6.1922	0	0
TBC1D12	502	552	5554	5906	11.57	10.86	116.88	116.98	11.215	116.93	3.3821	0	0
HNRNPH3	3670	4061	15157	16167	84.6	79.88	318.97	320.22	82.24	319.595	1.9583	0	0
SORBS1	5256	5885	20672	21930	121.16	115.75	435.03	434.37	118.455	434.7	1.8757	0	0
ALOX5	5347	6069	739	720	123.25	119.37	15.55	14.26	121.31	14.905	-3.0248	0	0
P4HA1	2954	3446	22966	24484	68.09	67.78	483.31	484.96	67.935	484.135	2.8332	0	0
EIF4EBP2	16276	19320	2235	2366	375.18	380.01	47.03	46.86	377.595	46.945	-3.0078	0	0
CHST3	11226	13591	2698	2688	258.77	267.33	56.78	53.24	263.05	55.01	-2.2576	0	0
CDH23	898	1103	11064	11237	20.7	21.7	232.84	222.57	21.2	227.705	3.425	0	0
VSIR	17472	20692	2861	3166	402.75	407	60.21	62.71	404.875	61.46	-2.7198	0	0
CAPG	7082	8785	793	786	163.25	172.8	16.69	15.57	168.025	16.13	-3.3809	0	0
UNC93B1	17876	21041	2256	2416	412.06	413.86	47.48	47.85	412.96	47.665	-3.115	0	0
TCIRG1	13679	15485	3030	3398	315.32	304.58	63.76	67.3	309.95	65.53	-2.2418	0	0
WDFY4	16008	18390	560	575	369	361.72	11.78	11.39	365.36	11.585	-4.979	0	0
CXCL12	63377	72973	3681	3917	1460.91	1435.33	77.46	77.58	1448.12	77.52	-4.2235	0	0
KIF1B	4475	5166	22646	25096	103.15	101.61	476.57	497.08	102.38	486.825	2.2495	0	0
DISP3	104	88	16133	17097	2.4	1.73	339.51	338.64	2.065	339.075	7.3593	0	0
GRAMD1B	5040	5973	23293	25615	116.18	117.49	490.19	507.36	116.835	498.775	2.0939	0	0
NCAPD3	8676	10125	308	278	199.99	199.15	6.48	5.51	199.57	5.995	-5.057	0	0
ST14	1412	1716	12540	12668	32.55	33.75	263.9	250.92	33.15	257.41	2.957	0	0
APLP2	32450	36903	149122	156715	748.01	725.86	3138.2	3104.09	736.935	3121.14	2.0825	0	0
FEZ1	1066	1286	10210	10706	24.57	25.29	214.86	212.06	24.93	213.46	3.098	0	0
RPL27A	31226	37041	16267	16915	719.79	728.57	342.33	335.04	724.18	338.685	-1.0964	0	0
TECTA	449	535	49728	51909	10.35	10.52	1046.5	1028.17	10.435	1037.34	6.6353	0	0
NECTIN1	446	587	9268	9893	10.28	11.55	195.04	195.95	10.915	195.495	4.1627	0	0
THY1	1962	2240	26724	28651	45.23	44.06	562.39	567.5	44.645	564.945	3.6615	0	0
CBL	12991	14923	3837	4005	299.46	293.53	80.75	79.33	296.495	80.04	-1.8892	0	0
ABCG4	6719	7904	972	995	154.88	155.47	20.46	19.71	155.175	20.085	-2.9497	0	0
HMBS	35092	40561	2659	2714	808.91	797.81	55.96	53.76	803.36	54.86	-3.8722	0	0
CD3E	83	96	4548	4591	1.91	1.89	95.71	90.93	1.9	93.32	5.6181	0	0
IL10RA	3640	4086	224	249	83.91	80.37	4.71	4.93	82.14	4.82	-4.091	0	0
DSCAML1	110	87	4947	5196	2.54	1.71	104.11	102.92	2.125	103.515	5.6062	0	0
BACE1	1755	1948	9944	10727	40.45	38.32	209.27	212.47	39.385	210.87	2.4206	0	0
POU2AF1	11276	13440	91	114	259.92	264.36	1.92	2.26	262.14	2.09	-6.9707	0	0
AGRN	13253	15530	59380	60778	305.5	305.47	1249.62	1203.84	305.485	1226.73	2.0056	0	0
ENO1	19769	24486	81231	87521	455.7	481.62	1709.47	1733.55	468.66	1721.51	1.8771	0	0
TNFRSF14	17896	21777	386	354	412.52	428.34	8.12	7.01	420.43	7.565	-5.7964	0	0
SLC45A1	174	156	7287	8132	4.01	3.07	153.35	161.07	3.54	157.21	5.4728	0	0
ESPN	623	632	14729	15545	14.36	12.43	309.97	307.9	13.395	308.935	4.5275	0	0
MMEL1	172	190	11350	12567	3.96	3.74	238.86	248.92	3.85	243.89	5.9852	0	0
TRIM28	16178	18591	5385	5370	372.92	365.67	113.32	106.36	369.295	109.84	-1.7494	0	0
LIG1	12965	15313	300	359	298.86	301.2	6.31	7.11	300.03	6.71	-5.4827	0	0
ARHGEF1	21293	25119	3339	3547	490.83	494.07	70.27	70.26	492.45	70.265	-2.8091	0	0
PRMT1	6525	7674	762	895	150.41	150.94	16.04	17.73	150.675	16.885	-3.1576	0	0
PPP1R15B	12811	15197	4227	4469	295.31	298.92	88.96	88.52	297.115	88.74	-1.7434	0	0
KIF18B	7542	8783	100	116	173.85	172.76	2.1	2.3	173.305	2.2	-6.2997	0	0
POLD1	12026	14140	787	937	277.21	278.12	16.56	18.56	277.665	17.56	-3.983	0	0
FBL	6426	7688	504	601	148.13	151.22	10.61	11.9	149.675	11.255	-3.7332	0	0
HSPB7	347	407	10231	10643	8	8.01	215.31	210.81	8.005	213.06	4.7342	0	0
CLCNKB	198	221	11162	12067	4.56	4.35	234.9	239.01	4.455	236.955	5.733	0	0
PADI2	4549	5222	61	52	104.86	102.71	1.28	1.03	103.785	1.155	-6.4896	0	0
NECAP2	10806	13006	3529	3579	249.09	255.82	74.27	70.89	252.455	72.58	-1.7984	0	0
ALPL	30622	35566	7495	7685	705.87	699.56	157.73	152.22	702.715	154.975	-2.1809	0	0
C1QC	8569	10500	1751	1671	197.53	206.53	36.85	33.1	202.03	34.975	-2.5302	0	0
SORCS1	287	357	5601	5489	6.62	7.02	117.87	108.72	6.82	113.295	4.0542	0	0
ZYX	24120	28510	6599	7111	555.99	560.77	138.87	140.85	558.38	139.86	-1.9973	0	0
NCAPD2	30833	36001	1157	1353	710.74	708.12	24.35	26.8	709.43	25.575	-4.7939	0	0
VCL	18938	21195	5360	6080	436.54	416.89	112.8	120.43	426.715	116.615	-1.8715	0	0
ALAD	16155	18702	2738	2578	372.39	367.86	57.62	51.06	370.125	54.34	-2.7679	0	0
RPL12	27528	32292	14682	15682	634.55	635.16	308.98	310.62	634.855	309.8	-1.0351	0	0
EDF1	4787	5537	17151	18013	110.35	108.91	360.93	356.79	109.63	358.86	1.7108	0	0
KCNT1	768	792	7531	8116	17.7	15.58	158.49	160.76	16.64	159.625	3.262	0	0
UBAC1	14382	17472	2464	2467	331.52	343.66	51.85	48.86	337.59	50.355	-2.7451	0	0
OLFM1	1417	1651	12094	13117	32.66	32.47	254.51	259.81	32.565	257.16	2.9813	0	0
CNTRL	9528	10780	1679	1838	219.63	212.04	35.33	36.41	215.835	35.87	-2.5891	0	0
STOM	17298	19903	1266	1287	398.74	391.48	26.64	25.49	395.11	26.065	-3.9221	0	0
GSN	52709	61189	136357	141611	1215	1203.55	2869.57	2804.92	1209.28	2837.24	1.2303	0	0
ODF2	11164	12771	1992	2143	257.34	251.2	41.92	42.45	254.27	42.185	-2.5916	0	0
LRRC8A	2892	3296	16207	17515	66.66	64.83	341.07	346.92	65.745	343.995	2.3874	0	0
FLNA	145219	171500	639	557	3347.46	3373.3	13.45	11.03	3360.38	12.24	-8.1009	0	0
AKNA	14481	16293	936	960	333.8	320.47	19.7	19.01	327.135	19.355	-4.0791	0	0
FAM120C	1291	1587	16442	16864	29.76	31.22	346.01	334.03	30.49	340.02	3.4792	0	0
BGN	44629	51323	495	604	1028.75	1009.49	10.42	11.96	1019.12	11.19	-6.509	0	0
SLC6A8	2818	3325	18700	19049	64.96	65.4	393.53	377.31	65.18	385.42	2.5639	0	0
OLFML2A	4815	5629	26129	27250	110.99	110.72	549.87	539.75	110.855	544.81	2.2971	0	0
TNC	35850	41293	9836	10989	826.38	812.21	206.99	217.66	819.295	212.325	-1.9481	0	0
DRP2	2534	2917	38820	40241	58.41	57.38	816.95	797.06	57.895	807.005	3.8011	0	0
PLP1	5756	6655	31996	33256	132.68	130.9	673.34	658.71	131.79	666.025	2.3373	0	0
MSN	29068	33245	11352	12036	670.05	653.91	238.9	238.4	661.98	238.65	-1.4719	0	0
OGT	22495	25972	52429	56643	518.54	510.85	1103.34	1121.94	514.695	1112.64	1.1122	0	0
SNX12	2044	2333	13057	14239	47.12	45.89	274.78	282.03	46.505	278.405	2.5817	0	0
TMEM255A	134	198	25575	26493	3.09	3.89	538.21	524.75	3.49	531.48	7.2506	0	0
ATP1B4	19	12	117349	123539	0.44	0.24	2469.56	2446.96	0.34	2458.26	12.8198	0	0
SLC16A2	879	1166	9885	10852	20.26	22.93	208.03	214.95	21.595	211.49	3.2918	0	0
SMARCA1	337	364	4945	5317	7.77	7.16	104.07	105.31	7.465	104.69	3.8098	0	0
RAB39B	164	157	6045	6331	3.78	3.09	127.21	125.4	3.435	126.305	5.2005	0	0
COL4A6	67	53	6770	6800	1.54	1.04	142.47	134.69	1.29	138.58	6.7472	0	0
TMEM164	9733	11608	2391	2611	224.36	228.32	50.32	51.72	226.34	51.02	-2.1494	0	0
CHRDL1	2732	2965	25084	26974	62.98	58.32	527.88	534.28	60.65	531.08	3.1303	0	0
PAK3	240	352	24351	26004	5.53	6.92	512.46	515.07	6.225	513.765	6.3669	0	0
TSPAN6	576	774	14703	14886	13.28	15.22	309.42	294.85	14.25	302.135	4.4062	0	0
CD99L2	3097	3702	13216	13841	71.39	72.82	278.12	274.15	72.105	276.135	1.9372	0	0
RNF128	200	287	4753	5041	4.61	5.65	100.02	99.85	5.13	99.935	4.284	0	0
SASH3	6555	7575	630	579	151.1	149	13.26	11.47	150.05	12.365	-3.6011	0	0
ZDHHC9	1445	1653	9425	9834	33.31	32.51	198.34	194.78	32.91	196.56	2.5784	0	0
POF1B	52	52	5628	6372	1.2	1.02	118.44	126.21	1.11	122.325	6.784	0	0
SH3BGRL	4683	5972	29131	31553	107.95	117.47	613.05	624.98	112.71	619.015	2.4574	0	0
ITM2A	2031	2388	81552	86968	46.82	46.97	1716.22	1722.59	46.895	1719.4	5.1963	0	0
PLS3	3244	3976	13662	14816	74.78	78.21	287.51	293.46	76.495	290.485	1.925	0	0
ATP11C	1428	1871	13737	14610	32.92	36.8	289.09	289.38	34.86	289.235	3.0526	0	0
VASP	15461	18063	859	773	356.39	355.29	18.08	15.31	355.84	16.695	-4.4137	0	0
DDR1	1953	2091	21694	22875	45.02	41.13	456.54	453.09	43.075	454.815	3.4004	0	0
ZC3H4	14073	16600	2713	2756	324.4	326.51	57.09	54.59	325.455	55.84	-2.5431	0	0
PLD3	10279	11863	2175	2254	236.94	233.34	45.77	44.65	235.14	45.21	-2.3788	0	0
ITPKC	660	742	7683	7767	15.21	14.59	161.69	153.84	14.9	157.765	3.4044	0	0
HNRNPUL1	24140	27888	2319	2416	556.45	548.54	48.8	47.85	552.495	48.325	-3.5151	0	0
CCDC97	6238	7136	1116	1253	143.79	140.36	23.49	24.82	142.075	24.155	-2.5563	0	0
TGFB1	13531	15926	3292	3164	311.9	313.25	69.28	62.67	312.575	65.975	-2.2442	0	0
ACTN4	35119	40211	18658	19965	809.53	790.93	392.65	395.45	800.23	394.05	-1.022	0	0
FOS	1090	1206	17801	18873	25.13	23.72	374.61	373.82	24.425	374.215	3.9374	0	0
ESRRB	1978	2348	17829	18962	45.6	46.18	375.2	375.58	45.89	375.39	3.0321	0	0
ANGEL1	522	560	7688	7975	12.03	11.01	161.79	157.96	11.52	159.875	3.7947	0	0
TMEM63C	202	215	9132	9613	4.66	4.23	192.18	190.41	4.445	191.295	5.4275	0	0
CALM1	24880	29805	65169	70262	573.51	586.25	1371.45	1391.69	579.88	1381.57	1.2525	0	0
RIN3	9193	10843	378	381	211.91	213.27	7.95	7.55	212.59	7.75	-4.7777	0	0
CHGA	1101	1354	12904	13463	25.38	26.63	271.56	266.66	26.005	269.11	3.3713	0	0
DDX24	6924	7955	711	880	159.61	156.47	14.96	17.43	158.04	16.195	-3.2867	0	0
GLRX5	11087	12397	2627	2840	255.57	243.84	55.28	56.25	249.705	55.765	-2.1628	0	0
CYP46A1	189	172	4949	5281	4.36	3.38	104.15	104.6	3.87	104.375	4.7533	0	0
ATL1	446	524	5162	5742	10.28	10.31	108.63	113.73	10.295	111.18	3.4329	0	0
GCH1	3919	5010	112	129	90.34	98.54	2.36	2.56	94.44	2.46	-5.2627	0	0
WDHD1	5939	7213	94	119	136.9	141.88	1.98	2.36	139.39	2.17	-6.0053	0	0
TMX1	3919	4986	103	83	90.34	98.07	2.17	1.64	94.205	1.905	-5.6279	0	0
PYGL	15929	18803	5975	6710	367.18	369.84	125.74	132.91	368.51	129.325	-1.5107	0	0
HSP90AA1	21309	24938	144231	155401	491.2	490.51	3035.28	3078.06	490.855	3056.67	2.6386	0	0
TRAF3	5338	6304	888	968	123.05	124	18.69	19.17	123.525	18.93	-2.7061	0	0
CKB	27324	33407	198511	207221	629.85	657.09	4177.57	4104.47	643.47	4141.02	2.686	0	0
AKT1	15593	18465	2776	3158	359.44	363.19	58.42	62.55	361.315	60.485	-2.5786	0	0
CEP170B	1112	1457	17452	19045	25.63	28.66	367.27	377.23	27.145	372.25	3.7775	0	0
BRF1	9892	12003	2387	2575	228.02	236.09	50.23	51	232.055	50.615	-2.1968	0	0
HSPA2	1427	1773	47844	50481	32.89	34.87	1006.85	999.89	33.88	1003.37	4.8883	0	0
SYNE2	7273	7719	67442	71708	167.65	151.83	1419.29	1420.34	159.74	1419.82	3.1519	0	0
SIX1	1408	1641	11429	11986	32.46	32.28	240.52	237.41	32.37	238.965	2.8841	0	0
RTN1	1602	1585	17994	18640	36.93	31.18	378.68	369.21	34.055	373.945	3.4569	0	0
DLGAP5	5312	5729	166	202	122.45	112.69	3.49	4	117.57	3.745	-4.9724	0	0
PAPLN	839	1010	24429	25261	19.34	19.87	514.1	500.35	19.605	507.225	4.6933	0	0
SPTB	52456	59372	1411	1463	1209.17	1167.81	29.69	28.98	1188.49	29.335	-5.3404	0	0
BAZ1A	7880	8883	1819	1959	181.64	174.72	38.28	38.8	178.18	38.54	-2.2089	0	0
ACTN1	18979	21977	6607	7013	437.49	432.27	139.04	138.91	434.88	138.975	-1.6458	0	0
CCDC177	25	44	6696	7327	0.58	0.87	140.91	145.13	0.725	143.02	7.624	0	0
COCH	142407	169480	601384	655156	3282.64	3333.56	12655.9	12976.8	3308.1	12816.3	1.9539	0	0
BUB1B	8253	9586	75	86	190.24	188.55	1.58	1.7	189.395	1.64	-6.8516	0	0
PLCB2	9651	11279	728	729	222.47	221.85	15.32	14.44	222.16	14.88	-3.9002	0	0
SPINT1	493	648	24018	25253	11.36	12.75	505.45	500.19	12.055	502.82	5.3823	0	0
CRIP2	2083	2309	14606	14993	48.02	45.42	307.38	296.97	46.72	302.175	2.6933	0	0
THBS1	72606	85389	11284	12652	1673.65	1679.55	237.47	250.6	1676.6	244.035	-2.7804	0	0
FUT8	3423	4049	14615	16469	78.9	79.64	307.57	326.21	79.27	316.89	1.9991	0	0
CADM3	3116	3376	30013	31743	71.83	66.4	631.61	628.74	69.115	630.175	3.1887	0	0
CTSK	18368	21136	5200	5142	423.4	415.73	109.43	101.85	419.565	105.64	-1.9897	0	0
HDGF	19598	21423	4401	4501	451.76	421.38	92.62	89.15	436.57	90.885	-2.2641	0	0
PEAR1	5385	6566	767	778	124.13	129.15	16.14	15.41	126.64	15.775	-3.005	0	0
MEF2D	14455	17054	3294	3655	333.2	335.44	69.32	72.4	334.32	70.86	-2.2382	0	0
CDC42SE1	8864	10298	2380	2387	204.33	202.56	50.09	47.28	203.445	48.685	-2.0631	0	0
PPOX	12594	14731	1088	1086	290.31	289.75	22.9	21.51	290.03	22.205	-3.7072	0	0
LMNA	13883	16532	517	457	320.02	325.17	10.88	9.05	322.595	9.965	-5.0167	0	0
UBAP2L	14829	17289	4892	5164	341.83	340.06	102.95	102.28	340.945	102.615	-1.7323	0	0
CREB3L4	59	82	6829	6904	1.36	1.61	143.71	136.75	1.485	140.23	6.5612	0	0
S100A11	9592	12703	457	458	221.11	249.86	9.62	9.07	235.485	9.345	-4.6553	0	0
S100A1	7422	8887	121461	123871	171.09	174.8	2556.09	2453.54	172.945	2504.82	3.8563	0	0
CGN	837	1015	11682	11760	19.29	19.96	245.84	232.93	19.625	239.385	3.6086	0	0
ZBTB7B	7045	8945	383	374	162.4	175.94	8.06	7.41	169.17	7.735	-4.4509	0	0
PKLR	5043	5925	87297	92061	116.25	116.54	1837.13	1823.47	116.395	1830.3	3.975	0	0
PTGDS	195450	221025	30487	29968	4505.34	4347.42	641.58	593.58	4426.38	617.58	-2.8414	0	0
BRD2	5138	5937	17900	19017	118.44	116.78	376.7	376.67	117.61	376.685	1.6793	0	0
TIMM17B	2066	2532	11260	12319	47.62	49.8	236.96	244.01	48.71	240.485	2.3037	0	0
KNSTRN	3981	4919	255	243	91.77	96.75	5.37	4.81	94.26	5.09	-4.2109	0	0
KNL1	4200	5354	112	90	96.81	105.31	2.36	1.78	101.06	2.07	-5.6094	0	0
VPS45	937	1095	7135	7430	21.6	21.54	150.15	147.17	21.57	148.66	2.7849	0	0
GABPB2	12183	14359	1236	1266	280.83	282.43	26.01	25.08	281.63	25.545	-3.4627	0	0
BGLAP	66492	77847	929	873	1532.72	1531.2	19.55	17.29	1531.96	18.42	-6.378	0	0
SYT11	2514	3131	12129	13065	57.95	61.58	255.25	258.78	59.765	257.015	2.1045	0	0
ABCA5	649	736	24495	26187	14.96	14.48	515.49	518.69	14.72	517.09	5.1346	0	0
KLHL11	1153	1464	8175	8992	26.58	28.8	172.04	178.11	27.69	175.075	2.6605	0	0
IGFBP4	35029	41136	7311	7340	807.46	809.12	153.86	145.38	808.29	149.62	-2.4336	0	0
TOP2A	29586	35101	528	517	681.99	690.41	11.11	10.24	686.2	10.675	-6.0063	0	0
CDC6	7212	8256	99	77	166.24	162.39	2.08	1.53	164.315	1.805	-6.5083	0	0
THRA	10047	11589	2152	2115	231.59	227.95	45.29	41.89	229.77	43.59	-2.3981	0	0
IKZF3	6722	8405	297	272	154.95	165.32	6.25	5.39	160.135	5.82	-4.7821	0	0
KPNB1	20685	24110	6275	6532	476.81	474.23	132.05	129.38	475.52	130.715	-1.8631	0	0
ARHGAP23	11952	14263	2989	2996	275.51	280.54	62.9	59.34	278.025	61.12	-2.1855	0	0
RIMS4	224	305	6796	7397	5.16	6	143.02	146.51	5.58	144.765	4.6973	0	0
KCNS1	515	605	8366	8349	11.87	11.9	176.06	165.37	11.885	170.715	3.8444	0	0
MATN4	1734	2222	43150	44017	39.97	43.71	908.07	871.85	41.84	889.96	4.4108	0	0
ABI3	11094	12751	340	345	255.73	250.8	7.16	6.83	253.265	6.995	-5.1782	0	0
GRN	27877	32028	7559	7773	642.6	629.97	159.08	153.96	636.285	156.52	-2.0233	0	0
SLC4A1	206456	239687	226	182	4759.04	4714.49	4.76	3.6	4736.77	4.18	-10.1462	0	0
SLC25A39	14177	16239	4116	4225	326.8	319.41	86.62	83.69	323.105	85.155	-1.9238	0	0
COL1A1	763454	877746	42682	43077	17598.5	17264.7	898.22	853.24	17431.6	875.73	-4.3151	0	0
FMNL1	16371	19343	1199	1357	377.37	380.46	25.23	26.88	378.915	26.055	-3.8622	0	0
NMT1	7617	8995	2055	2182	175.58	176.93	43.25	43.22	176.255	43.235	-2.0274	0	0
LIMD2	13625	15902	1323	1538	314.07	312.78	27.84	30.46	313.425	29.15	-3.4266	0	0
ITGB3	32770	37936	665	797	755.39	746.18	13.99	15.79	750.785	14.89	-5.656	0	0
SERINC3	84374	99643	25551	26605	1944.92	1959.92	537.71	526.97	1952.42	532.34	-1.8748	0	0
ARHGAP27	6519	7680	679	794	150.27	151.06	14.29	15.73	150.665	15.01	-3.3273	0	0
PREX1	17027	20553	4562	4918	392.49	404.26	96.01	97.41	398.375	96.71	-2.0424	0	0
PTPN1	8883	10389	1474	1499	204.76	204.35	31.02	29.69	204.555	30.355	-2.7525	0	0
RBM38	27122	32894	4755	5142	625.19	647	100.07	101.85	636.095	100.96	-2.6555	0	0
LAMA5	4924	6154	21205	22306	113.5	121.05	446.25	441.82	117.275	444.035	1.9208	0	0
CTSZ	16868	20449	6172	6463	388.83	402.22	129.89	128.01	395.525	128.95	-1.617	0	0
COL9A3	2529	3023	34247	35265	58.3	59.46	720.71	698.5	58.88	709.605	3.5912	0	0
KCNQ2	758	984	8858	9861	17.47	19.35	186.41	195.32	18.41	190.865	3.374	0	0
EEF1A2	7152	8144	69093	71325	164.86	160.19	1454.03	1412.75	162.525	1433.39	3.1407	0	0
PCMTD2	3180	4088	17394	19003	73.3	80.41	366.05	376.4	76.855	371.225	2.2721	0	0
ZBTB46	1409	1791	11322	11891	32.48	35.23	238.27	235.53	33.855	236.9	2.8068	0	0
FKBP1A	4805	5695	20889	22020	110.76	112.02	439.6	436.15	111.39	437.875	1.9749	0	0
TPX2	8033	8917	838	976	185.17	175.39	17.64	19.33	180.28	18.485	-3.2858	0	0
KCNJ16	920	1227	14129	15349	21.21	24.13	297.34	304.02	22.67	300.68	3.7294	0	0
FSCN2	168	255	7558	8284	3.87	5.02	159.05	164.08	4.445	161.565	5.1838	0	0
ACTG1	105047	123978	16398	17090	2421.45	2438.57	345.09	338.51	2430.01	341.8	-2.8297	0	0
BAHCC1	2718	3363	13020	14062	62.65	66.15	274	278.53	64.4	276.265	2.1009	0	0
MAFG	12408	14959	1630	1514	286.02	294.23	34.3	29.99	290.125	32.145	-3.174	0	0
TK1	6881	8258	147	154	158.61	162.43	3.09	3.05	160.52	3.07	-5.7084	0	0
WNK4	1171	1471	11777	12678	26.99	28.93	247.84	251.12	27.96	249.48	3.1575	0	0
PSME3	16303	19184	6399	7042	375.8	377.34	134.66	139.48	376.57	137.07	-1.458	0	0
RPL27	13460	15554	35690	37622	310.27	305.94	751.08	745.19	308.105	748.135	1.2799	0	0
BRCA1	4183	5065	145	155	96.42	99.63	3.05	3.07	98.025	3.06	-5.0015	0	0
TMC6	11681	13230	1786	1957	269.26	260.23	37.59	38.76	264.745	38.175	-2.7939	0	0
MMP9	54654	64434	1452	1524	1259.84	1267.38	30.56	30.19	1263.61	30.375	-5.3785	0	0
PLTP	4565	5320	26026	26943	105.23	104.64	547.71	533.67	104.935	540.69	2.3653	0	0
EPB42	15770	18402	33	30	363.52	361.96	0.69	0.59	362.74	0.64	-9.1466	0	0
MYBL2	6949	8123	1230	1174	160.18	159.77	25.88	23.25	159.975	24.565	-2.7032	0	0
ZHX3	1899	2150	15780	16147	43.77	42.29	332.08	319.83	43.03	325.955	2.9213	0	0
GGT7	463	549	7988	8165	10.67	10.8	168.1	161.73	10.735	164.915	3.9413	0	0
RALY	19434	22556	4302	4565	447.98	443.66	90.53	90.42	445.82	90.475	-2.3009	0	0
SAMHD1	16579	18847	2120	2199	382.16	370.71	44.61	43.56	376.435	44.085	-3.094	0	0
NECAB3	142	217	4730	4979	3.27	4.27	99.54	98.62	3.77	99.08	4.716	0	0
CHAD	5436	6373	33374	34327	125.31	125.35	702.34	679.92	125.33	691.13	2.4632	0	0
LRRC59	9134	10608	1792	1961	210.55	208.65	37.71	38.84	209.6	38.275	-2.4532	0	0
HID1	2053	2470	19303	20027	47.32	48.58	406.22	396.68	47.95	401.45	3.0656	0	0
LLGL2	1360	1689	19398	20387	31.35	33.22	408.22	403.81	32.285	406.015	3.6526	0	0
ITGB4	1627	1797	15887	16853	37.5	35.35	334.33	333.81	36.425	334.07	3.1971	0	0
CYGB	900	1094	15745	16392	20.75	21.52	331.35	324.68	21.135	328.015	3.9561	0	0
ST6GALNAC2	479	501	9095	9398	11.04	9.85	191.4	186.15	10.445	188.775	4.1758	0	0
PMP22	8375	9984	38346	41040	193.05	196.38	806.97	812.89	194.715	809.93	2.0564	0	0
USP43	121	130	7139	7428	2.79	2.56	150.24	147.13	2.675	148.685	5.7966	0	0
RGS11	714	798	6033	6523	16.46	15.7	126.96	129.2	16.08	128.08	2.9937	0	0
KPNA2	9731	10874	355	313	224.31	213.88	7.47	6.2	219.095	6.835	-5.0025	0	0
SUZ12	4848	5912	614	684	111.75	116.29	12.92	13.55	114.02	13.235	-3.1069	0	0
ACTR3	21532	25550	5504	5512	496.34	502.55	115.83	109.18	499.445	112.505	-2.1503	0	0
DPP10	72	85	4736	5091	1.66	1.67	99.67	100.84	1.665	100.255	5.912	0	0
HEG1	4626	5669	23107	24022	106.63	111.51	486.28	475.81	109.07	481.045	2.1409	0	0
TFCP2L1	348	433	5103	5419	8.02	8.52	107.39	107.34	8.27	107.365	3.6985	0	0
SEMA5B	72	75	6155	6423	1.66	1.48	129.53	127.22	1.57	128.375	6.3535	0	0
EPB41L5	555	698	7779	8526	12.79	13.73	163.71	168.88	13.26	166.295	3.6486	0	0
GYPC	11626	14139	1334	1370	267.99	278.11	28.07	27.14	273.05	27.605	-3.3062	0	0
IGFBP5	49749	57233	10934	11548	1146.77	1125.74	230.1	228.73	1136.26	229.415	-2.3083	0	0
IGFBP2	3174	3913	14988	16069	73.16	76.97	315.42	318.28	75.065	316.85	2.0776	0	0
MCM6	18652	21226	1545	1599	429.95	417.5	32.51	31.67	423.725	32.09	-3.7229	0	0
CYTIP	4797	5391	429	399	110.58	106.04	9.03	7.9	108.31	8.465	-3.6775	0	0
SLC4A10	4699	5536	168	192	108.32	108.89	3.54	3.8	108.605	3.67	-4.8872	0	0
FAP	5661	6995	998	1082	130.49	137.59	21	21.43	134.04	21.215	-2.6595	0	0
LRP2	13790	15654	60434	65674	317.88	307.9	1271.81	1300.82	312.89	1286.32	2.0395	0	0
CDCA7	4607	5043	242	317	106.2	99.19	5.09	6.28	102.695	5.685	-4.1751	0	0
TTN	8227	9919	566	611	189.64	195.1	11.91	12.1	192.37	12.005	-4.0022	0	0
ITGA4	12802	15256	608	774	295.1	300.08	12.8	15.33	297.59	14.065	-4.4031	0	0
FRZB	994	1133	33372	35931	22.91	22.29	702.3	711.69	22.6	706.995	4.9673	0	0
COL18A1	1243	1391	46500	48250	28.65	27.36	978.57	955.7	28.005	967.135	5.11	0	0
COL6A1	11073	12358	2071	2265	255.25	243.07	43.58	44.86	249.16	44.22	-2.4943	0	0
FN1	50563	59622	24382	25148	1165.53	1172.73	513.11	498.11	1169.13	505.61	-1.2093	0	0
MAP2	1514	1705	12987	14065	34.9	33.54	273.31	278.59	34.22	275.95	3.0115	0	0
ITGB2	26661	31174	2578	2938	614.57	613.17	54.25	58.19	613.87	56.22	-3.4488	0	0
TRAK2	25372	29603	1950	2191	584.85	582.27	41.04	43.4	583.56	42.22	-3.7889	0	0
SATB2	6172	6643	208	230	142.27	130.66	4.38	4.56	136.465	4.47	-4.9321	0	0
NBEAL1	1587	1802	12898	14244	36.58	35.44	271.43	282.13	36.01	276.78	2.9423	0	0
NRP2	13963	16616	4264	4349	321.86	326.83	89.73	86.14	324.345	87.935	-1.883	0	0
IDH1	2919	3567	13483	14493	67.29	70.16	283.74	287.07	68.725	285.405	2.0541	0	0
COL5A2	35804	40852	13493	14039	825.32	803.53	283.95	278.07	814.425	281.01	-1.5352	0	0
MFSD6	2416	2926	15162	15881	55.69	57.55	319.08	314.56	56.62	316.82	2.4843	0	0
ACTB	221203	260368	126148	134016	5098.98	5121.27	2654.73	2654.48	5110.12	2654.61	-0.9449	0	0
ARPC1B	32548	38918	6735	7038	750.27	765.49	141.73	139.4	757.88	140.565	-2.4307	0	0
CARHSP1	14682	16638	2414	2470	338.44	327.26	50.8	48.92	332.85	49.86	-2.7389	0	0
USP7	19798	23598	7464	8051	456.37	464.16	157.08	159.47	460.265	158.275	-1.54	0	0
SNN	8835	10031	1193	1189	203.66	197.3	25.11	23.55	200.48	24.33	-3.0427	0	0
NDUFB7	6193	7064	148	176	142.76	138.94	3.11	3.49	140.85	3.3	-5.4155	0	0
BMERB1	193	246	6529	7282	4.45	4.84	137.4	144.24	4.645	140.82	4.922	0	0
NDE1	7846	8733	934	999	180.86	171.77	19.66	19.79	176.315	19.725	-3.1601	0	0
ELFN1	175	260	6242	6513	4.03	5.11	131.36	129	4.57	130.18	4.8322	0	0
EIF2AK1	11963	14352	2166	2191	275.76	282.29	45.58	43.4	279.025	44.49	-2.6488	0	0
OTOA	2709	3493	34340	38191	62.45	68.71	722.67	756.46	65.58	739.565	3.4953	0	0
CDR2	14928	17610	1190	1280	344.11	346.38	25.04	25.35	345.245	25.195	-3.7764	0	0
PLK1	8376	9869	100	100	193.08	194.12	2.1	1.98	193.6	2.04	-6.5684	0	0
PIGQ	31191	36581	1140	1073	718.99	719.53	23.99	21.25	719.26	22.62	-4.9908	0	0
RAB11FIP3	2949	3343	14009	14452	67.98	65.75	294.81	286.25	66.865	290.53	2.1194	0	0
SBK1	6471	7602	685	684	149.16	149.53	14.42	13.55	149.345	13.985	-3.4167	0	0
BRICD5	264	306	20897	21893	6.09	6.02	439.77	433.64	6.055	436.705	6.1724	0	0
RASD1	124	157	6711	6514	2.86	3.09	141.23	129.02	2.975	135.125	5.5053	0	0
PEMT	73	125	6377	6614	1.68	2.46	134.2	131	2.07	132.6	6.0013	0	0
RAI1	13132	15408	4752	4965	302.71	303.07	100	98.34	302.89	99.17	-1.6108	0	0
PPL	574	682	51903	52461	13.23	13.41	1092.27	1039.11	13.32	1065.69	6.322	0	0
UBN1	9138	10112	1701	1663	210.64	198.9	35.8	32.94	204.77	34.37	-2.5748	0	0
PKMYT1	3531	4303	69	71	81.39	84.64	1.45	1.41	83.015	1.43	-5.8593	0	0
PHGDH	5948	6634	176	228	137.11	130.49	3.7	4.52	133.8	4.11	-5.0248	0	0
DUSP14	335	362	9104	9810	7.72	7.12	191.59	194.31	7.42	192.95	4.7007	0	0
ALDOA	48290	55775	1565	1601	1113.14	1097.06	32.93	31.71	1105.1	32.32	-5.0956	0	0
TCTN3	689	707	7743	8725	15.88	13.91	162.95	172.82	14.895	167.885	3.4946	0	0
SH2B1	8534	10531	1206	1280	196.72	207.14	25.38	25.35	201.93	25.365	-2.9929	0	0
NMRAL1	2158	2467	16733	17580	49.74	48.52	352.14	348.21	49.13	350.175	2.8334	0	0
PNPO	6887	8072	1099	1112	158.75	158.77	23.13	22.03	158.76	22.58	-2.8137	0	0
DCAF7	11731	13561	3487	3657	270.41	266.74	73.38	72.43	268.575	72.905	-1.8812	0	0
DNAJC5	10012	11240	859	1002	230.79	221.08	18.08	19.85	225.935	18.965	-3.5745	0	0
UBE2O	24076	28287	6375	6587	554.98	556.39	134.16	130.47	555.685	132.315	-2.0703	0	0
RPS15A	16	23	19435	21268	0.37	0.45	409	421.26	0.41	415.13	9.9837	0	0
FUS	35335	40545	12146	11999	814.51	797.49	255.61	237.67	806	246.64	-1.7084	0	0
B2M	33383	38642	114824	122019	769.52	760.06	2416.42	2416.86	764.79	2416.64	1.6599	0	0
GDA	11265	13778	992	1107	259.67	271	20.88	21.93	265.335	21.405	-3.6318	0	0
CLCA2	532	578	18499	20014	12.26	11.37	389.3	396.42	11.815	392.86	5.0553	0	0
CD74	21232	24848	54726	56182	489.42	488.74	1151.68	1112.81	489.08	1132.24	1.211	4.56169e-308	5.05933e-307
NFKB1	10401	12139	3146	3150	239.75	238.77	66.21	62.39	239.26	64.3	-1.8957	1.9274e-307	2.13548e-306
ATF7IP	11286	13934	3819	4076	260.16	274.07	80.37	80.73	267.115	80.55	-1.7295	8.88297e-307	9.83194e-306
RGS9	178	229	3973	4297	4.1	4.5	83.61	85.11	4.3	84.36	4.2942	2.98749e-306	3.30327e-305
RAD54L	4085	4701	324	286	94.16	92.47	6.82	5.66	93.315	6.24	-3.9025	4.06898e-306	4.49451e-305
SGPP2	649	753	5663	6048	14.96	14.81	119.18	119.79	14.885	119.485	3.0049	5.45106e-306	6.015e-305
ECT2	3245	3845	51	75	74.8	75.63	1.07	1.49	75.215	1.28	-5.8768	6.93511e-306	7.64402e-305
RPS6KA1	15725	18730	6638	7277	362.48	368.41	139.69	144.14	365.445	141.915	-1.3646	6.94143e-306	7.64402e-305
STEAP3	5213	6155	977	1036	120.17	121.06	20.56	20.52	120.615	20.54	-2.5539	2.70512e-305	2.9759e-304
CHAC1	227	279	4820	4692	5.23	5.49	101.43	92.94	5.36	97.185	4.1804	4.20052e-305	4.61632e-304
SOX13	1582	1753	9470	9723	36.47	34.48	199.29	192.59	35.475	195.94	2.4655	1.44942e-304	1.59129e-303
PPM1K	566	738	6015	6323	13.05	14.52	126.58	125.24	13.785	125.91	3.1912	5.59691e-304	6.13851e-303
NUP62	7779	8915	1919	2126	179.31	175.35	40.38	42.11	177.33	41.245	-2.1041	5.95373e-303	6.52327e-302
IL6ST	18609	21648	8668	9368	428.96	425.8	182.41	185.55	427.38	183.98	-1.216	7.62136e-303	8.342e-302
LYN	10014	12075	2507	2910	230.83	237.51	52.76	57.64	234.17	55.2	-2.0848	8.03307e-303	8.7838e-302
RFC2	5889	6787	1011	979	135.75	133.5	21.28	19.39	134.625	20.335	-2.7269	1.0194e-302	1.11355e-301
NSUN2	7310	7877	1235	1333	168.5	154.94	25.99	26.4	161.72	26.195	-2.6261	1.07169e-302	1.16949e-301
STOX1	73	98	3864	3947	1.68	1.93	81.32	78.18	1.805	79.75	5.4654	6.01811e-302	6.5607e-301
LDB1	13055	16187	4058	4028	300.93	318.39	85.4	79.78	309.66	82.59	-1.9066	8.71121e-302	9.48709e-301
MACROD2	179	186	3930	4326	4.13	3.66	82.71	85.69	3.895	84.2	4.4341	3.23401e-301	3.51853e-300
TSPAN14	8420	9929	2397	2653	194.09	195.3	50.44	52.55	194.695	51.495	-1.9187	4.78772e-301	5.20371e-300
C5AR1	2982	3672	97	124	68.74	72.23	2.04	2.46	70.485	2.25	-4.9693	6.5657e-300	7.12904e-299
WNT2B	3117	3600	100	82	71.85	70.81	2.1	1.62	71.33	1.86	-5.2611	1.02625e-299	1.11319e-298
BRPF3	10569	12038	2894	3279	243.63	236.78	60.9	64.95	240.205	62.925	-1.9326	3.17021e-299	3.43534e-298
CHAF1A	6247	7342	1161	1343	144	144.41	24.43	26.6	144.205	25.515	-2.4987	3.4825e-299	3.76999e-298
DAPK2	4115	4580	432	470	94.86	90.09	9.09	9.31	92.475	9.2	-3.3294	6.06167e-299	6.55554e-298
LPGAT1	4750	5900	17721	19120	109.49	116.05	372.93	378.71	112.77	375.82	1.7367	3.39381e-298	3.66666e-297
SCOC	864	1150	7651	8203	19.92	22.62	161.01	162.48	21.27	161.745	2.9268	3.59271e-298	3.8777e-297
JAKMIP2	109	132	3580	3958	2.51	2.6	75.34	78.4	2.555	76.87	4.911	4.04101e-298	4.35723e-297
S1PR4	3331	3852	50	45	76.78	75.77	1.05	0.89	76.275	0.97	-6.2971	6.54674e-298	7.05204e-297
DENND5A	12290	14399	4890	5192	283.3	283.22	102.91	102.84	283.26	102.875	-1.4612	8.52238e-298	9.17106e-297
WWP2	12252	14725	4863	5173	282.42	289.63	102.34	102.46	286.025	102.4	-1.4819	1.80486e-297	1.94031e-296
COL7A1	299	408	5006	5167	6.89	8.03	105.35	102.34	7.46	103.845	3.7991	3.74334e-297	4.0203e-296
SLC38A4	265	332	4579	5366	6.11	6.53	96.36	106.29	6.32	101.325	4.0029	9.65243e-297	1.03563e-295
RBM47	824	976	6456	6636	18.99	19.2	135.86	131.44	19.095	133.65	2.8072	2.187e-296	2.34417e-295
LOXHD1	967	1180	6873	7181	22.29	23.21	144.64	142.24	22.75	143.44	2.6565	4.65065e-296	4.97996e-295
PDIA4	6855	8123	21059	23156	158.02	159.77	443.18	458.66	158.895	450.92	1.5048	6.99351e-296	7.48133e-295
SYDE2	430	516	4986	5126	9.91	10.15	104.93	101.53	10.03	103.23	3.3635	1.92116e-295	2.05314e-294
IGSF11	379	527	5582	6181	8.74	10.37	117.47	122.43	9.555	119.95	3.65	2.05033e-295	2.18903e-294
GNAS	56935	66846	4807	5902	1312.42	1314.82	101.16	116.9	1313.62	109.03	-3.5908	3.0342e-295	3.23629e-294
TSPAN32	3667	4451	34	39	84.53	87.55	0.72	0.77	86.04	0.745	-6.8516	3.19043e-295	3.39958e-294
SLC25A29	594	703	5397	5957	13.69	13.83	113.58	117.99	13.76	115.785	3.0729	3.31663e-295	3.53058e-294
RAB27A	5501	6489	1043	1034	126.8	127.63	21.95	20.48	127.215	21.215	-2.5841	4.19421e-293	4.46041e-292
MBD2	8106	9335	2038	2296	186.85	183.61	42.89	45.48	185.23	44.185	-2.0677	4.64527e-293	4.93526e-292
JAK3	4031	4854	550	565	92.92	95.48	11.57	11.19	94.2	11.38	-3.0492	1.32315e-292	1.40438e-291
SNX5	7300	8501	1841	1853	168.27	167.21	38.74	36.7	167.74	37.72	-2.1528	3.358e-292	3.56066e-291
SH3BGRL3	15623	18216	6726	6937	360.13	358.3	141.55	137.4	359.215	139.475	-1.3648	1.45888e-291	1.54542e-290
MDK	916	1106	8125	7887	21.11	21.75	170.99	156.22	21.43	163.605	2.9325	3.47799e-291	3.68071e-290
SH3BP4	1627	2264	14417	14661	37.5	44.53	303.4	290.39	41.015	296.895	2.8557	7.54473e-291	7.9767e-290
MAX	6705	8164	1611	1629	154.56	160.58	33.9	32.27	157.57	33.085	-2.2517	4.47633e-290	4.72802e-289
GREB1L	210	232	3909	4086	4.84	4.56	82.26	80.93	4.7	81.595	4.1177	6.35526e-290	6.70606e-289
TNNI2	3016	3425	97	126	69.52	67.37	2.04	2.5	68.445	2.27	-4.9142	1.01619e-289	1.07124e-288
ATXN10	5732	6358	940	937	132.13	125.06	19.78	18.56	128.595	19.17	-2.7459	5.9185e-289	6.23308e-288
SPNS2	4390	4891	409	494	101.19	96.2	8.61	9.78	98.695	9.195	-3.4241	8.92084e-289	9.3859e-288
TMEM234	4503	5154	645	641	103.8	101.38	13.57	12.7	102.59	13.135	-2.9654	1.11003e-288	1.16676e-287
TMEM59	9590	11025	26969	29582	221.06	216.85	567.55	585.94	218.955	576.745	1.3973	1.65272e-288	1.73552e-287
TSPAN9	3082	4065	75	100	71.04	79.96	1.58	1.98	75.5	1.78	-5.4065	5.35382e-288	5.61659e-287
CRIP1	1669	2218	12040	12237	38.47	43.63	253.38	242.38	41.05	247.88	2.5942	1.87277e-287	1.96279e-286
CEP250	8238	9477	1804	1724	189.9	186.41	37.96	34.15	188.155	36.055	-2.3837	1.96522e-287	2.0577e-286
COQ4	860	872	9209	8907	19.82	17.15	193.8	176.42	18.485	185.11	3.324	2.40267e-287	2.51331e-286
PACSIN1	998	1149	6684	7002	23.01	22.6	140.66	138.69	22.805	139.675	2.6147	5.56875e-287	5.81959e-286
SLC34A2	132	116	3996	4455	3.04	2.28	84.09	88.24	2.66	86.165	5.0176	5.64519e-287	5.8938e-286
ULK1	8355	9470	2250	2465	192.59	186.27	47.35	48.82	189.43	48.085	-1.978	6.06448e-287	6.32547e-286
POLQ	3271	3915	157	209	75.4	77.01	3.3	4.14	76.205	3.72	-4.3565	8.91447e-287	9.28919e-286
LONRF3	585	703	5697	6583	13.48	13.83	119.89	130.39	13.655	125.14	3.196	1.99841e-286	2.08042e-285
PTPRT	226	264	3883	4342	5.21	5.19	81.72	86	5.2	83.86	4.0114	2.04001e-286	2.12169e-285
NEFL	4624	5270	16710	17274	106.59	103.66	351.65	342.15	105.125	346.9	1.7224	5.65896e-286	5.8799e-285
WIF1	7692	9553	2066	2231	177.31	187.9	43.48	44.19	182.605	43.835	-2.0586	6.68676e-286	6.94119e-285
PRKG1	507	594	5098	5267	11.69	11.68	107.29	104.32	11.685	105.805	3.1787	2.07035e-285	2.14707e-284
SLC35F1	116	168	3962	4631	2.67	3.3	83.38	91.73	2.985	87.555	4.8744	2.20029e-285	2.27965e-284
TUBB3	1946	2308	9910	10128	44.86	45.4	208.55	200.61	45.13	204.58	2.1805	4.3023e-285	4.45323e-284
TIMELESS	5672	6659	1270	1343	130.75	130.98	26.73	26.6	130.865	26.665	-2.2951	5.21837e-285	5.39629e-284
FABP3	462	590	5298	5429	10.65	11.6	111.49	107.53	11.125	109.51	3.2992	6.48802e-285	6.70285e-284
SDC1	1741	1979	8825	9310	40.13	38.93	185.72	184.41	39.53	185.065	2.227	8.19386e-285	8.45712e-284
SMPD4	5491	6595	1002	1149	126.57	129.72	21.09	22.76	128.145	21.925	-2.5471	8.84884e-285	9.12448e-284
UNC13D	7217	8460	1298	1557	166.36	166.4	27.32	30.84	166.38	29.08	-2.5164	1.04004e-284	1.07142e-283
SPTAN1	25274	28963	57232	60724	582.59	569.68	1204.42	1202.77	576.135	1203.6	1.0629	2.36311e-284	2.4321e-283
RPLP2	25430	30342	14014	14654	586.19	596.81	294.92	290.25	591.5	292.585	-1.0155	2.76504e-284	2.84307e-283
FAM110C	252	287	3992	4180	5.81	5.65	84.01	82.79	5.73	83.4	3.8634	3.18837e-284	3.27524e-283
ARAP3	8082	9288	2260	2305	186.3	182.69	47.56	45.66	184.495	46.61	-1.9849	3.25695e-284	3.34253e-283
GRHL2	366	399	4501	4759	8.44	7.85	94.72	94.26	8.145	94.49	3.5362	7.83414e-284	8.0324e-283
CELF2	5454	6693	809	748	125.72	131.65	17.03	14.82	128.685	15.925	-3.0145	1.64638e-283	1.68645e-282
FKBP8	16490	20218	5170	4967	380.11	397.68	108.8	98.38	388.895	103.59	-1.9085	6.15634e-283	6.30024e-282
EPHX2	319	403	4582	4668	7.35	7.93	96.43	92.46	7.64	94.445	3.6278	9.09896e-283	9.30288e-282
HCK	6151	7194	24	16	141.79	141.5	0.51	0.32	141.645	0.415	-8.415	4.46739e-282	4.56321e-281
KIF15	3654	4019	199	255	84.23	79.05	4.19	5.05	81.64	4.62	-4.1433	6.75106e-282	6.88938e-281
KDM7A	7097	8136	1813	1859	163.59	160.03	38.15	36.82	161.81	37.485	-2.1099	6.94082e-282	7.07638e-281
LMBR1	433	451	5185	5930	9.98	8.87	109.12	117.46	9.425	113.29	3.5874	7.747e-282	7.8909e-281
SLC38A6	1146	1312	7383	8360	26.42	25.81	155.37	165.59	26.115	160.48	2.6194	1.2163e-281	1.23773e-280
LAMC1	10633	12897	30213	31390	245.1	253.68	635.82	621.75	249.39	628.785	1.3342	2.63842e-281	2.6824e-280
GOT1	3478	3892	13547	14661	80.17	76.55	285.09	290.39	78.36	287.74	1.8766	2.75711e-281	2.80044e-280
PIK3AP1	9702	11458	3479	3736	223.64	225.37	73.21	74	224.505	73.605	-1.6089	8.2689e-281	8.391e-280
BAZ1B	17333	21584	6824	7529	399.55	424.54	143.61	149.13	412.045	146.37	-1.4932	5.69572e-280	5.77443e-279
WNT6	179	229	3730	3920	4.13	4.5	78.5	77.64	4.315	78.07	4.1773	1.30816e-279	1.325e-278
PDE1B	2697	3310	68	73	62.17	65.11	1.43	1.45	63.64	1.44	-5.4658	2.08696e-279	2.11185e-278
HNRNPM	19178	22434	9571	10336	442.07	441.26	201.42	204.73	441.665	203.075	-1.1209	2.10051e-279	2.12359e-278
GRAP2	3220	3660	216	257	74.22	71.99	4.55	5.09	73.105	4.82	-3.9229	2.45236e-279	2.47699e-278
LRP12	832	1065	6518	6982	19.18	20.95	137.17	138.29	20.065	137.73	2.7791	6.58449e-279	6.64446e-278
DNA2	3739	3912	51	40	86.19	76.95	1.07	0.79	81.57	0.93	-6.4547	6.79256e-279	6.84806e-278
RASSF10	175	152	4328	4689	4.03	2.99	91.08	92.88	3.51	91.98	4.7118	1.11912e-278	1.12722e-277
SSRP1	17847	20452	7829	8068	411.39	402.28	164.76	159.8	406.835	162.28	-1.326	1.62066e-278	1.63087e-277
PTPA	19573	22890	8974	9125	451.18	450.23	188.85	180.74	450.705	184.795	-1.2863	2.19206e-278	2.20383e-277
JPH1	425	465	4653	4955	9.8	9.15	97.92	98.14	9.475	98.03	3.371	2.61549e-278	2.62711e-277
RRM2	22690	26639	162	125	523.03	523.97	3.41	2.48	523.5	2.945	-7.4738	3.8478e-278	3.86132e-277
LRRC73	94	100	3637	3634	2.17	1.97	76.54	71.98	2.07	74.26	5.1649	4.13508e-278	4.14577e-277
AP1M1	8105	9356	2312	2555	186.83	184.03	48.65	50.61	185.43	49.63	-1.9016	7.94673e-278	7.95993e-277
SMPDL3A	5390	6685	837	988	124.25	131.49	17.61	19.57	127.87	18.59	-2.7821	1.70793e-277	1.70919e-276
TCF4	5516	6555	830	1000	127.15	128.93	17.47	19.81	128.04	18.64	-2.7801	5.98125e-277	5.98015e-276
FGR	6307	7681	1345	1311	145.38	151.08	28.3	25.97	148.23	27.135	-2.4496	6.91611e-277	6.90848e-276
SLC13A4	2982	3699	41	60	68.74	72.76	0.86	1.19	70.75	1.025	-6.109	8.8171e-277	8.79927e-276
LAMA1	1172	1441	7169	7699	27.02	28.34	150.87	152.5	27.68	151.685	2.4542	1.52805e-276	1.52356e-275
SRSF5	23464	26844	11036	11317	540.87	528	232.25	224.16	534.435	228.205	-1.2277	1.56767e-276	1.56163e-275
IRF4	4671	5697	497	433	107.67	112.06	10.46	8.58	109.865	9.52	-3.5286	1.57822e-276	1.5707e-275
ITGA2B	22504	26096	1338	1194	518.74	513.29	28.16	23.65	516.015	25.905	-4.3161	9.16585e-276	9.11381e-275
GARNL3	221	235	3836	4034	5.09	4.62	80.73	79.9	4.855	80.315	4.0481	2.4523e-275	2.43615e-274
TNNT3	3436	3786	33	56	79.2	74.47	0.69	1.11	76.835	0.9	-6.4157	2.51633e-275	2.49747e-274
TMEM132B	56	56	3581	3762	1.29	1.1	75.36	74.51	1.195	74.935	5.9706	6.65126e-275	6.59537e-274
CRLF3	8751	10235	2184	2537	201.72	201.32	45.96	50.25	201.52	48.105	-2.0667	9.12303e-275	9.03813e-274
LUC7L2	12050	15191	4057	4183	277.77	298.8	85.38	82.85	288.285	84.115	-1.7771	1.54648e-274	1.53069e-273
ASXL1	9631	10877	2994	3102	222.01	213.94	63.01	61.44	217.975	62.225	-1.8086	7.54943e-274	7.46554e-273
PSTPIP1	5512	6540	462	622	127.06	128.64	9.72	12.32	127.85	11.02	-3.5363	1.81764e-273	1.79581e-272
ARHGEF18	9123	10988	2914	3238	210.3	216.13	61.32	64.14	213.215	62.73	-1.7651	3.54515e-273	3.49938e-272
COBL	608	757	5324	5712	14.02	14.89	112.04	113.14	14.455	112.59	2.9614	4.84268e-273	4.77583e-272
LRCH2	136	171	3526	4072	3.13	3.36	74.2	80.65	3.245	77.425	4.5765	1.03603e-272	1.0208e-271
LRRC32	2728	3348	125	112	62.88	65.85	2.63	2.22	64.365	2.425	-4.7302	1.05584e-272	1.03937e-271
PODXL2	1954	2497	10538	11613	45.04	49.11	221.77	230.02	47.075	225.895	2.2626	1.66698e-272	1.6395e-271
TIMP2	17091	21222	49582	51143	393.97	417.42	1043.43	1013	405.695	1028.21	1.3417	3.83768e-272	3.771e-271
ABCC9	5730	6565	1185	1320	132.08	129.13	24.94	26.15	130.605	25.545	-2.3541	6.46219e-272	6.34416e-271
TIFA	3935	5141	447	471	90.71	101.12	9.41	9.33	95.915	9.37	-3.3556	9.70978e-272	9.52383e-271
NOXO1	483	505	5038	5454	11.13	9.93	106.02	108.03	10.53	107.025	3.3454	9.93013e-272	9.73117e-271
CPNE2	4809	5171	609	634	110.85	101.71	12.82	12.56	106.28	12.69	-3.0661	4.5197e-271	4.42515e-270
SHROOM2	1290	1544	7243	7730	29.74	30.37	152.43	153.11	30.055	152.77	2.3457	6.61794e-271	6.47366e-270
RASSF2	8205	9229	2131	2144	189.13	181.53	44.85	42.47	185.33	43.66	-2.0857	7.91634e-271	7.73678e-270
PEPD	2535	3039	10479	11337	58.43	59.78	220.53	224.55	59.105	222.54	1.9127	1.08972e-270	1.06404e-269
SMPX	224	285	3859	4024	5.16	5.61	81.21	79.7	5.385	80.455	3.9012	2.51339e-270	2.45196e-269
ZSWIM8	13350	16596	5231	5507	307.73	326.43	110.08	109.08	317.08	109.58	-1.5329	1.23906e-269	1.20769e-268
TMED5	1478	1692	7760	8456	34.07	33.28	163.31	167.49	33.675	165.4	2.2962	1.6084e-269	1.56628e-268
MICU3	265	335	4105	4708	6.11	6.59	86.39	93.25	6.35	89.82	3.8222	1.91156e-269	1.85983e-268
PRPF8	36749	43711	23067	24219	847.11	859.77	485.43	479.71	853.44	482.57	-0.8226	4.84921e-269	4.71376e-268
RPS10	9630	11223	30260	30485	221.98	220.75	636.81	603.82	221.365	620.315	1.4866	8.34763e-269	8.1072e-268
F3	1127	1436	7399	8008	25.98	28.25	155.71	158.62	27.115	157.165	2.5351	1.01971e-268	9.89461e-268
LIMD1	7452	9338	1939	2131	171.78	183.67	40.81	42.21	177.725	41.51	-2.0981	3.02391e-268	2.93158e-267
EYA4	2003	2364	9032	9801	46.17	46.5	190.07	194.13	46.335	192.1	2.0517	9.15107e-268	8.86372e-267
ZMIZ1	14572	16975	6593	7100	335.9	333.89	138.75	140.63	334.895	139.69	-1.2615	1.25377e-267	1.21332e-266
GPX2	17	16	9731	9866	0.39	0.31	204.78	195.42	0.35	200.1	9.1592	3.65987e-267	3.53863e-266
TRAPPC3	2666	3075	10774	11785	61.45	60.48	226.73	233.43	60.965	230.08	1.9161	7.64345e-267	7.38368e-266
BDNF	78	113	3321	3588	1.8	2.22	69.89	71.07	2.01	70.48	5.1319	7.67083e-267	7.40354e-266
F2RL2	2803	3104	116	135	64.61	61.05	2.44	2.67	62.83	2.555	-4.6201	1.10645e-266	1.06694e-265
TSPO	8053	9634	2641	2831	185.63	189.49	55.58	56.07	187.56	55.825	-1.7484	1.45924e-266	1.4059e-265
IFI30	2538	2690	13708	13887	58.5	52.91	288.48	275.06	55.705	281.77	2.3386	2.63259e-266	2.53411e-265
STARD5	991	1017	7785	8054	22.84	20	163.83	159.53	21.42	161.68	2.9161	4.72813e-266	4.54722e-265
UBALD2	5712	6987	828	1017	131.67	137.43	17.42	20.14	134.55	18.78	-2.8409	1.90698e-265	1.83238e-264
PSEN1	5777	6644	1326	1362	133.17	130.68	27.91	26.98	131.925	27.445	-2.2651	2.20698e-265	2.11878e-264
PTPRF	10378	12130	26269	28284	239.22	238.59	552.82	560.23	238.905	556.525	1.22	2.64001e-265	2.53226e-264
ETV4	201	295	4327	4568	4.63	5.8	91.06	90.48	5.215	90.77	4.1215	3.49864e-265	3.35289e-264
TAPBP	4723	5466	15475	16236	108.87	107.51	325.66	321.59	108.19	323.625	1.5808	5.32111e-265	5.09493e-264
NFATC1	5658	6467	1214	1337	130.42	127.2	25.55	26.48	128.81	26.015	-2.3078	6.45321e-265	6.17348e-264
C1QTNF4	83	84	3247	3443	1.91	1.65	68.33	68.2	1.78	68.265	5.2612	9.31943e-265	8.9076e-264
APEH	11143	12918	4389	4711	256.86	254.09	92.36	93.31	255.475	92.835	-1.4604	3.10953e-264	2.9695e-263
FAM174B	732	977	6516	7101	16.87	19.22	137.13	140.65	18.045	138.89	2.9443	5.30499e-264	5.06165e-263
PAICS	9613	11348	3502	3615	221.59	223.21	73.7	71.6	222.4	72.65	-1.6141	6.57829e-264	6.27103e-263
NR3C1	5855	7035	1438	1470	134.96	138.37	30.26	29.12	136.665	29.69	-2.2026	7.00398e-264	6.67099e-263
CDKN2C	4030	5065	547	618	92.9	99.63	11.51	12.24	96.265	11.875	-3.0191	2.6476e-263	2.51951e-262
CDK9	8423	9785	2638	2678	194.16	192.46	55.52	53.04	193.31	54.28	-1.8324	3.92989e-263	3.73649e-262
BTK	4312	5090	677	657	99.4	100.12	14.25	13.01	99.76	13.63	-2.8717	6.95711e-263	6.60895e-262
PTK2	1962	2485	9953	10812	45.23	48.88	209.46	214.16	47.055	211.81	2.1704	1.07608e-262	1.02134e-261
PDP1	863	1050	6063	6758	19.89	20.65	127.59	133.86	20.27	130.725	2.6891	5.26075e-262	4.98875e-261
EGR1	2429	3072	11945	12285	55.99	60.42	251.38	243.33	58.205	247.355	2.0874	1.87851e-261	1.77983e-260
CACHD1	1393	1506	8191	8556	32.11	29.62	172.38	169.47	30.865	170.925	2.4693	1.97776e-261	1.87223e-260
EFHD2	8831	10710	2915	3209	203.56	210.66	61.34	63.56	207.11	62.45	-1.7296	2.08764e-261	1.97453e-260
FZD7	2203	2538	9603	10076	50.78	49.92	202.09	199.58	50.35	200.835	1.9959	2.4771e-261	2.34085e-260
CRYBB1	41	42	3813	3869	0.95	0.83	80.24	76.63	0.89	78.435	6.4615	5.66908e-261	5.35259e-260
SPG7	4517	5167	15145	15891	104.12	101.63	318.72	314.76	102.875	316.74	1.6224	8.68768e-261	8.19556e-260
LMNB1	17601	20685	548	465	405.72	406.86	11.53	9.21	406.29	10.37	-5.292	8.80355e-261	8.29766e-260
PPP6R3	11248	12771	3927	4318	259.28	251.2	82.64	85.53	255.24	84.085	-1.6019	1.66948e-260	1.57217e-259
NUF2	2680	3384	166	177	61.78	66.56	3.49	3.51	64.17	3.5	-4.1965	1.68752e-260	1.58779e-259
CLMN	1676	1827	8801	9623	38.63	35.94	185.21	190.6	37.285	187.905	2.3333	2.77554e-260	2.60925e-259
INTS7	6139	7067	1240	1438	141.51	139	26.1	28.48	140.255	27.29	-2.3616	1.84593e-259	1.73384e-258
DOK2	2956	3748	244	266	68.14	73.72	5.13	5.27	70.93	5.2	-3.7698	2.05118e-259	1.92496e-258
PROM1	1492	1781	7606	8138	34.39	35.03	160.06	161.19	34.71	160.625	2.2103	3.45177e-259	3.23656e-258
IL17RA	6491	7720	1848	1967	149.62	151.85	38.89	38.96	150.735	38.925	-1.9532	5.76778e-259	5.4035e-258
SLC35E3	1148	1457	7274	7935	26.46	28.66	153.08	157.17	27.56	155.125	2.4928	7.32203e-259	6.85367e-258
UPK1B	284	348	3958	4091	6.55	6.84	83.29	81.03	6.695	82.16	3.6173	7.54687e-259	7.05804e-258
TM7SF3	5271	5940	1058	1132	121.5	116.84	22.27	22.42	119.17	22.345	-2.415	1.00318e-258	9.37399e-258
VRK1	3736	4201	473	487	86.12	82.63	9.95	9.65	84.375	9.8	-3.106	1.66963e-258	1.5588e-257
SYT14	462	550	4633	5262	10.65	10.82	97.5	104.23	10.735	100.865	3.232	3.41044e-258	3.18132e-257
SLC12A2	9819	12212	29891	32950	226.34	240.2	629.04	652.65	233.27	640.845	1.458	3.71807e-258	3.46531e-257
USP20	2323	2631	9920	10495	53.55	51.75	208.76	207.88	52.65	208.32	1.9843	5.58222e-258	5.19826e-257
ABHD3	328	328	4439	5005	7.56	6.45	93.42	99.14	7.005	96.28	3.7808	2.03858e-257	1.89674e-256
B4GALT4	1277	1422	7398	7693	29.44	27.97	155.69	152.38	28.705	154.035	2.4239	2.22886e-257	2.072e-256
FBN2	3550	4328	402	472	81.83	85.13	8.46	9.35	83.48	8.905	-3.2287	8.96133e-257	8.32353e-256
NF1	2383	3088	12028	12961	54.93	60.74	253.12	256.72	57.835	254.92	2.14	1.50624e-256	1.39784e-255
RBL1	4237	5314	697	757	97.67	104.52	14.67	14.99	101.095	14.83	-2.7691	1.64361e-255	1.52403e-254
BCAN	603	812	5874	6395	13.9	15.97	123.62	126.67	14.935	125.145	3.0668	2.13811e-255	1.98086e-254
MPZ	21573	24890	61115	61080	497.28	489.57	1286.14	1209.82	493.425	1247.98	1.3387	2.91528e-255	2.69856e-254
FRS3	276	345	3903	4046	6.36	6.79	82.14	80.14	6.575	81.14	3.6254	2.1849e-254	2.02075e-253
PIGF	212	241	3581	3682	4.89	4.74	75.36	72.93	4.815	74.145	3.9447	2.27299e-254	2.10044e-253
RNPEPL1	6502	7786	1240	1487	149.88	153.15	26.1	29.45	151.515	27.775	-2.4476	2.47953e-254	2.28935e-253
ARID2	9508	11657	2498	2924	219.17	229.29	52.57	57.92	224.23	55.245	-2.0211	4.81159e-254	4.43877e-253
ACOX3	5614	5954	839	897	129.41	117.11	17.66	17.77	123.26	17.715	-2.7987	1.84177e-253	1.69761e-252
ANAPC2	9228	10166	2588	2790	212.72	199.96	54.46	55.26	206.34	54.86	-1.9112	4.27727e-253	3.93915e-252
GLE1	4632	5536	963	1015	106.77	108.89	20.27	20.1	107.83	20.185	-2.4174	5.97414e-253	5.49722e-252
VAT1	7173	8708	20637	21966	165.35	171.28	434.3	435.09	168.315	434.695	1.3688	7.07987e-253	6.50916e-252
LTA4H	12271	14728	4993	5077	282.86	289.69	105.08	100.56	286.275	102.82	-1.4773	1.10848e-252	1.01827e-251
TACC1	11562	13713	4975	5321	266.52	269.73	104.7	105.39	268.125	105.045	-1.3519	1.58822e-252	1.45772e-251
CDH5	5284	6268	1139	1283	121.8	123.29	23.97	25.41	122.545	24.69	-2.3113	3.89973e-252	3.57629e-251
USP15	9480	10936	2558	2977	218.52	215.1	53.83	58.97	216.81	56.4	-1.9427	6.0752e-252	5.56662e-251
NDST1	9926	11711	3836	4160	228.81	230.35	80.73	82.4	229.58	81.565	-1.493	1.02898e-251	9.42042e-251
ARHGAP25	3839	4207	342	416	88.49	82.75	7.2	8.24	85.62	7.72	-3.4713	2.41497e-250	2.20907e-249
EHD3	5345	6461	16532	17862	123.21	127.08	347.91	353.8	125.145	350.855	1.4873	3.5553e-250	3.24945e-249
AK3	5517	6627	1255	1412	127.17	130.35	26.41	27.97	128.76	27.19	-2.2435	8.36816e-250	7.64184e-249
NMI	702	817	5162	5518	16.18	16.07	108.63	109.3	16.125	108.965	2.7565	1.40105e-249	1.27837e-248
BSG	41795	51042	98170	101370	963.42	1003.96	2065.94	2007.86	983.69	2036.9	1.0501	2.33828e-249	2.13174e-248
FAM107A	5738	6772	1383	1545	132.27	133.2	29.1	30.6	132.735	29.85	-2.1527	3.5976e-249	3.27707e-248
WASF2	17949	21051	9179	9537	413.74	414.06	193.17	188.9	413.9	191.035	-1.1154	4.40635e-249	4.01041e-248
ZSWIM5	470	565	4532	4701	10.83	11.11	95.37	93.11	10.97	94.24	3.1028	6.0901e-249	5.53822e-248
SLC44A3	682	920	6269	6958	15.72	18.1	131.93	137.82	16.91	134.875	2.9957	7.27914e-249	6.61396e-248
MTHFD1	7306	8998	2228	2324	168.41	176.98	46.89	46.03	172.695	46.46	-1.8942	1.21898e-248	1.10667e-247
RAC3	214	257	3400	3685	4.93	5.06	71.55	72.99	4.995	72.27	3.8548	3.81914e-248	3.46435e-247
CENPA	5734	6612	22	12	132.18	130.05	0.46	0.24	131.115	0.35	-8.5493	4.02244e-248	3.64571e-247
SRCIN1	1199	1444	6740	7402	27.64	28.4	141.84	146.61	28.02	144.225	2.3638	5.26008e-248	4.76346e-247
SLC28A2	2866	3086	151	145	66.06	60.7	3.18	2.87	63.38	3.025	-4.389	7.06704e-248	6.39449e-247
PAFAH1B2	4599	5474	14501	15501	106.01	107.67	305.17	307.03	106.84	306.1	1.5186	1.23954e-247	1.12065e-246
ATAD5	2947	3568	292	327	67.93	70.18	6.15	6.48	69.055	6.315	-3.4509	1.30066e-247	1.17492e-246
GADD45A	5055	5953	1074	1204	116.52	117.09	22.6	23.85	116.805	23.225	-2.3304	1.36591e-247	1.23284e-246
ADAM15	6078	7487	16	16	140.1	147.26	0.34	0.32	143.68	0.33	-8.7662	1.47213e-247	1.32761e-246
USP19	16794	18753	6435	6509	387.12	368.86	135.42	128.93	377.99	132.175	-1.5159	1.99657e-247	1.79907e-246
CSNK1D	13764	15901	6236	6562	317.28	312.76	131.23	129.97	315.02	130.6	-1.2703	2.02319e-247	1.82154e-246
VAMP7	666	757	5055	5382	15.35	14.89	106.38	106.6	15.12	106.49	2.8162	2.83612e-247	2.55133e-246
CITED4	1575	1797	9450	9261	36.31	35.35	198.87	183.43	35.83	191.15	2.4155	3.41711e-247	3.07144e-246
CCDC39	232	287	3723	4347	5.35	5.65	78.35	86.1	5.5	82.225	3.9021	4.40926e-247	3.95994e-246
ARSB	8719	9712	2586	2690	200.98	191.03	54.42	53.28	196.005	53.85	-1.8639	4.56484e-247	4.09628e-246
GFPT2	602	600	5797	6144	13.88	11.8	122	121.7	12.84	121.85	3.2464	4.76272e-247	4.27032e-246
E2F1	4066	4453	546	568	93.73	87.59	11.49	11.25	90.66	11.37	-2.9952	1.30045e-246	1.16504e-245
ABI2	1033	1401	8053	8833	23.81	27.56	169.47	174.96	25.685	172.215	2.7452	1.65617e-246	1.4825e-245
MPZL2	2390	2778	9576	10248	55.09	54.64	201.52	202.98	54.865	202.25	1.8822	4.85506e-246	4.34236e-245
HES6	2433	2961	108	95	56.08	58.24	2.27	1.88	57.16	2.075	-4.7838	5.1421e-245	4.59531e-244
TSNAX	4533	5341	846	958	104.49	105.05	17.8	18.98	104.77	18.39	-2.5102	1.64805e-244	1.47159e-243
PLEKHA7	1268	1578	7236	7598	29.23	31.04	152.28	150.5	30.135	151.39	2.3288	1.79808e-244	1.60423e-243
SFT2D2	9515	11010	3473	3569	219.33	216.56	73.09	70.69	217.945	71.89	-1.6001	2.33691e-244	2.08327e-243
EPN3	1441	1492	9813	9809	33.22	29.35	206.51	194.29	31.285	200.4	2.6793	3.16165e-244	2.81618e-243
PPRC1	5357	6109	1081	1229	123.48	120.16	22.75	24.34	121.82	23.545	-2.3713	6.13925e-244	5.46393e-243
PNPLA3	290	288	4007	4391	6.68	5.66	84.33	86.97	6.17	85.65	3.7951	4.57205e-243	4.06579e-242
GAK	10915	12607	4300	4693	251.6	247.97	90.49	92.96	249.785	91.725	-1.4453	6.20364e-243	5.5122e-242
ELOF1	3450	3780	242	205	79.53	74.35	5.09	4.06	76.94	4.575	-4.0719	7.04252e-243	6.25247e-242
BTBD6	1381	1536	7732	7915	31.83	30.21	162.72	156.77	31.02	159.745	2.3645	8.77142e-243	7.78106e-242
FGF10	449	449	5431	6509	10.35	8.83	114.29	128.93	9.59	121.61	3.6646	9.45001e-243	8.37618e-242
PKD1	16378	19424	8350	9014	377.53	382.06	175.72	178.54	379.795	177.13	-1.1004	1.42159e-242	1.25902e-241
SRSF2	19387	23381	10107	10988	446.89	459.89	212.7	217.64	453.39	215.17	-1.0753	1.76592e-242	1.56271e-241
KIF11	5399	6084	431	592	124.45	119.67	9.07	11.73	122.06	10.4	-3.5529	1.8678e-242	1.65151e-241
F2RL1	103	102	3006	3302	2.37	2.01	63.26	65.4	2.19	64.33	4.8765	2.1301e-242	1.88191e-241
UBE2I	8684	10229	2661	3032	200.18	201.2	56	60.06	200.69	58.03	-1.7901	2.86261e-242	2.52701e-241
FZD5	2619	2928	158	155	60.37	57.59	3.33	3.07	58.98	3.2	-4.2041	3.13918e-242	2.76891e-241
ANGPTL1	140	224	4071	4655	3.23	4.41	85.67	92.2	3.82	88.935	4.5411	3.81162e-242	3.3593e-241
RGS19	5371	5993	760	685	123.81	117.88	15.99	13.57	120.845	14.78	-3.0314	4.04658e-242	3.56348e-241
OBSL1	2577	3343	96	77	59.4	65.75	2.02	1.53	62.575	1.775	-5.1397	6.38363e-242	5.61698e-241
GID8	8689	10079	1956	2352	200.29	198.25	41.16	46.59	199.27	43.875	-2.1833	7.94625e-242	6.98627e-241
OTUD7A	136	115	3603	3841	3.13	2.26	75.82	76.08	2.695	75.95	4.8167	8.2799e-242	7.27372e-241
ADAM11	2473	3032	11356	11472	57.01	59.64	238.98	227.23	58.325	233.105	1.9988	8.44146e-242	7.40965e-241
ABHD1	72	59	3178	3421	1.66	1.16	66.88	67.76	1.41	67.32	5.5773	1.55737e-241	1.36591e-240
EEF2	197057	227870	140144	145315	4542.39	4482.06	2949.27	2878.29	4512.23	2913.78	-0.6309	1.61475e-240	1.41509e-239
GJB2	11751	13932	28442	30931	270.87	274.03	598.55	612.66	272.45	605.605	1.1524	2.06339e-240	1.8068e-239
TCF12	6481	7566	18063	19481	149.39	148.82	380.13	385.86	149.105	382.995	1.361	2.07528e-240	1.81574e-239
FHL2	924	1050	6189	6292	21.3	20.65	130.24	124.63	20.975	127.435	2.603	3.16e-240	2.76259e-239
SH3GLB1	8944	9880	2017	2362	206.17	194.33	42.45	46.78	200.25	44.615	-2.1662	4.28591e-240	3.74388e-239
CLGN	199	273	3570	3849	4.59	5.37	75.13	76.24	4.98	75.685	3.9258	6.93012e-240	6.04881e-239
STYK1	84	77	3044	3473	1.94	1.51	64.06	68.79	1.725	66.425	5.2671	1.22993e-238	1.07266e-237
CEP128	2794	3125	189	172	64.4	61.47	3.98	3.41	62.935	3.695	-4.0902	1.75416e-238	1.52863e-237
FLVCR2	321	441	4304	4603	7.4	8.67	90.58	91.17	8.035	90.875	3.4995	5.99892e-238	5.22343e-237
SEMA4D	11903	14013	4083	3966	274.38	275.63	85.92	78.56	275.005	82.24	-1.7415	1.37981e-237	1.20048e-236
PTBP1	24853	29093	14255	15499	572.89	572.24	299.99	306.99	572.565	303.49	-0.9158	1.82876e-237	1.5898e-236
MSRB1	6732	8165	886	1154	155.18	160.6	18.65	22.86	157.89	20.755	-2.9274	2.59539e-237	2.25446e-236
RGS8	104	78	3721	3853	2.4	1.53	78.31	76.32	1.965	77.315	5.2981	4.45902e-237	3.87018e-236
MORN4	333	341	4426	4406	7.68	6.71	93.14	87.27	7.195	90.205	3.6481	6.15996e-237	5.34224e-236
UBE2Z	6522	7688	1977	2038	150.34	151.22	41.61	40.37	150.78	40.99	-1.8791	5.10163e-236	4.42087e-235
EFNB1	2686	3170	10903	11145	61.92	62.35	229.45	220.75	62.135	225.1	1.8571	7.76325e-236	6.72196e-235
EPB41L4B	1487	1719	7343	7686	34.28	33.81	154.53	152.24	34.045	153.385	2.1716	1.05406e-235	9.11955e-235
CACNA2D2	444	607	4939	5433	10.23	11.94	103.94	107.61	11.085	105.775	3.2543	1.13996e-235	9.85487e-235
FABP4	2945	3246	26	46	67.89	63.85	0.55	0.91	65.87	0.73	-6.4956	6.40292e-235	5.53086e-234
AMPD3	7359	8507	1929	2223	169.63	167.33	40.59	44.03	168.48	42.31	-1.9935	1.61517e-234	1.39408e-233
NDUFS5	2029	2244	9018	9710	46.77	44.14	189.78	192.33	45.455	191.055	2.0715	3.1554e-234	2.72131e-233
NCAPH	5116	5719	680	601	117.93	112.49	14.31	11.9	115.21	13.105	-3.1361	7.44752e-234	6.41787e-233
SCIN	451	480	4533	4644	10.4	9.44	95.39	91.98	9.92	93.685	3.2394	1.20854e-233	1.04062e-232
CALML4	232	206	4359	4431	5.35	4.05	91.73	87.77	4.7	89.75	4.2552	2.37795e-233	2.04594e-232
ST3GAL2	8826	10395	3415	3602	203.45	204.46	71.87	71.35	203.955	71.61	-1.51	3.36137e-233	2.88977e-232
SLC25A5	25223	28954	11731	11675	581.42	569.51	246.87	231.25	575.465	239.06	-1.2674	3.92267e-233	3.36965e-232
CDC14A	1712	2038	7887	8704	39.46	40.09	165.98	172.4	39.775	169.19	2.0887	4.98256e-233	4.27673e-232
RPS2	45257	52530	28677	29664	1043.23	1033.23	603.49	587.56	1038.23	595.525	-0.8019	5.11441e-233	4.38643e-232
TATDN3	416	437	4284	4799	9.59	8.6	90.15	95.05	9.095	92.6	3.3479	1.22991e-232	1.05401e-231
ATP2A2	17359	20382	9183	9907	400.14	400.9	193.25	196.23	400.52	194.74	-1.0403	1.7185e-232	1.47156e-231
GLIPR2	3072	3982	257	312	70.81	78.32	5.41	6.18	74.565	5.795	-3.6856	3.87916e-232	3.31914e-231
MFSD12	5494	6449	1375	1376	126.64	126.85	28.94	27.25	126.745	28.095	-2.1735	8.74805e-232	7.47924e-231
FAM168B	17195	19985	8036	8931	396.36	393.09	169.11	176.9	394.725	173.005	-1.19	9.86004e-232	8.42331e-231
PRSS35	11629	13889	4918	5424	268.06	273.19	103.5	107.43	270.625	105.465	-1.3595	1.87337e-231	1.59914e-230
PLEKHO2	7789	9664	2472	2513	179.55	190.08	52.02	49.78	184.815	50.9	-1.8603	5.27416e-231	4.49857e-230
XRCC6	5762	6062	916	1006	132.82	119.24	19.28	19.93	126.03	19.605	-2.6845	1.21725e-230	1.03743e-229
PATJ	1148	1289	6634	7502	26.46	25.35	139.61	148.59	25.905	144.1	2.4758	1.7915e-230	1.52565e-229
CYB5R2	60	56	2885	3081	1.38	1.1	60.71	61.03	1.24	60.87	5.6173	3.64684e-230	3.10324e-229
ALDH3B1	4015	4604	717	726	92.55	90.56	15.09	14.38	91.555	14.735	-2.6354	4.54042e-230	3.8606e-229
MYLK	7057	8032	2161	2300	162.67	157.98	45.48	45.56	160.325	45.52	-1.8164	5.4656e-230	4.64362e-229
CLIP4	440	482	4127	4467	10.14	9.48	86.85	88.48	9.81	87.665	3.1597	7.38891e-230	6.27278e-229
AFF1	16361	19148	8599	9159	377.14	376.63	180.96	181.41	376.885	181.185	-1.0567	1.30648e-229	1.10826e-228
HNRNPA2B1	46213	52714	28304	29583	1065.26	1036.85	595.64	585.96	1051.06	590.8	-0.8311	6.79912e-229	5.76307e-228
PITRM1	6234	7395	1912	2047	143.7	145.45	40.24	40.55	144.575	40.395	-1.8396	1.18828e-228	1.00642e-227
ZIC2	3567	4081	12131	12818	82.22	80.27	255.29	253.89	81.245	254.59	1.6478	1.20732e-228	1.02175e-227
PLPPR3	2931	3571	350	384	67.56	70.24	7.37	7.61	68.9	7.49	-3.2015	1.21185e-228	1.02479e-227
OPHN1	1246	1357	7082	7939	28.72	26.69	149.04	157.25	27.705	153.145	2.4667	1.24637e-228	1.05316e-227
DUSP19	230	327	3892	4406	5.3	6.43	81.91	87.27	5.865	84.59	3.8503	2.30627e-228	1.94724e-227
SLC25A38	6452	7804	1399	1299	148.73	153.5	29.44	25.73	151.115	27.585	-2.4537	3.84121e-228	3.24071e-227
CDKL2	122	154	2933	3383	2.81	3.03	61.72	67.01	2.92	64.365	4.4622	8.16974e-228	6.88719e-227
LDLRAP1	6414	7335	1874	2006	147.85	144.27	39.44	39.73	146.06	39.585	-1.8835	2.03422e-227	1.71354e-226
TXNRD1	5448	6400	1490	1567	125.58	125.88	31.36	31.04	125.73	31.2	-2.0107	3.62595e-227	3.05199e-226
MGAM	2460	2862	149	182	56.71	56.29	3.14	3.6	56.5	3.37	-4.0674	5.35065e-227	4.50018e-226
LPCAT3	6756	7786	1918	1911	155.73	153.15	40.36	37.85	154.44	39.105	-1.9816	8.07992e-227	6.79038e-226
EEF2K	9277	10560	3418	3581	213.85	207.71	71.93	70.93	210.78	71.43	-1.5611	8.44923e-227	7.09526e-226
NID2	2331	2642	9411	9894	53.73	51.97	198.05	195.97	52.85	197.01	1.8983	1.1681e-226	9.80158e-226
TSPAN15	1433	1714	7083	7424	33.03	33.71	149.06	147.05	33.37	148.055	2.1495	1.98415e-226	1.66362e-225
ARHGAP5	1061	1338	6444	7126	24.46	26.32	135.61	141.15	25.39	138.38	2.4463	2.56991e-226	2.1531e-225
CKS1B	3275	3713	409	397	75.49	73.03	8.61	7.86	74.26	8.235	-3.1727	9.64016e-226	8.07038e-225
SWI5	5748	7022	1225	1443	132.5	138.12	25.78	28.58	135.31	27.18	-2.3157	2.83389e-225	2.3706e-224
MAL	2237	2536	78	72	51.57	49.88	1.64	1.43	50.725	1.535	-5.0464	1.2848e-224	1.07393e-223
TNRC6B	13578	16281	5986	6667	312.99	320.24	125.97	132.05	316.615	129.01	-1.2952	1.83507e-224	1.5327e-223
HPGD	2253	2749	83	110	51.93	54.07	1.75	2.18	53	1.965	-4.7534	2.06382e-224	1.72244e-223
PPM1L	2851	3404	10294	11001	65.72	66.95	216.63	217.9	66.335	217.265	1.7116	2.16132e-224	1.80243e-223
CLIC6	360	540	5693	5792	8.3	10.62	119.81	114.72	9.46	117.265	3.6318	2.42146e-224	2.01782e-223
PTPRK	2695	3489	12392	12990	62.12	68.63	260.78	257.3	65.375	259.04	1.9864	4.32564e-224	3.60183e-223
GOSR2	8337	9385	2109	2463	192.18	184.6	44.38	48.79	188.39	46.585	-2.0158	5.81192e-224	4.83569e-223
ZNRF1	6314	7051	1535	1718	145.54	138.69	32.3	34.03	142.115	33.165	-2.0993	2.58384e-223	2.14819e-222
POSTN	4184	5077	879	900	96.45	99.86	18.5	17.83	98.155	18.165	-2.4339	3.50578e-223	2.91246e-222
PROM2	2314	2527	66	76	53.34	49.7	1.39	1.51	51.52	1.45	-5.151	4.84163e-223	4.01915e-222
CDV3	8491	10700	2828	3057	195.73	210.46	59.51	60.55	203.095	60.03	-1.7584	5.96381e-223	4.94691e-222
MXD3	2531	2819	185	187	58.34	55.45	3.89	3.7	56.895	3.795	-3.9061	7.58458e-223	6.28651e-222
NOS2	243	277	3302	3749	5.6	5.45	69.49	74.26	5.525	71.875	3.7014	9.70516e-223	8.03803e-222
NIN	10260	11389	2304	2782	236.5	224.01	48.49	55.1	230.255	51.795	-2.1523	1.10456e-222	9.14122e-222
MATR3	5152	6360	16330	17742	118.76	125.1	343.66	351.42	121.93	347.54	1.5111	1.64732e-222	1.36227e-221
DPF2	6757	7833	1712	1639	155.76	154.07	36.03	32.46	154.915	34.245	-2.1775	2.15169e-222	1.77801e-221
RHPN2	669	906	5865	6572	15.42	17.82	123.43	130.17	16.62	126.8	2.9316	6.31791e-222	5.21672e-221
NGFR	638	847	5981	5949	14.71	16.66	125.87	117.83	15.685	121.85	2.9576	8.67956e-222	7.1613e-221
PDLIM4	406	487	3856	4190	9.36	9.58	81.15	82.99	9.47	82.07	3.1154	1.15159e-221	9.49427e-221
WWC1	1467	1708	7003	7375	33.82	33.6	147.37	146.08	33.71	146.725	2.1219	1.24181e-221	1.02304e-220
AMOT	1400	1744	7674	7827	32.27	34.3	161.5	155.03	33.285	158.265	2.2494	2.08694e-221	1.71797e-220
COL16A1	2200	2872	11308	11668	50.71	56.49	237.97	231.11	53.6	234.54	2.1295	2.33337e-221	1.91937e-220
PCBP2	22229	26317	13211	13867	512.4	517.64	278.02	274.67	515.02	276.345	-0.8982	2.35608e-221	1.93659e-220
MYBPC1	3055	3635	210	283	70.42	71.5	4.42	5.61	70.96	5.015	-3.8227	2.38038e-221	1.95508e-220
PAQR5	300	377	3582	3786	6.92	7.42	75.38	74.99	7.17	75.185	3.3904	2.53925e-221	2.08399e-220
F10	2313	2703	122	151	53.32	53.17	2.57	2.99	53.245	2.78	-4.2595	2.63677e-221	2.16239e-220
TACC3	7230	7647	1505	1632	166.66	150.41	31.67	32.33	158.535	32	-2.3087	4.06682e-221	3.33264e-220
RREB1	6389	7583	2067	2192	147.27	149.15	43.5	43.42	148.21	43.46	-1.7699	5.46724e-221	4.47687e-220
SPTSSB	12	26	5032	5147	0.28	0.51	105.9	101.95	0.395	103.925	8.0395	6.98844e-221	5.7182e-220
RPS6KA6	16	27	4288	4941	0.37	0.53	90.24	97.87	0.45	94.055	7.7074	7.3549e-221	6.01352e-220
PDZK1IP1	3409	3733	138	208	78.58	73.43	2.9	4.12	76.005	3.51	-4.4366	8.22736e-221	6.7218e-220
EPDR1	3457	3998	535	595	79.69	78.64	11.26	11.79	79.165	11.525	-2.7801	1.22133e-220	9.97083e-220
SELP	2992	3390	358	386	68.97	66.68	7.53	7.65	67.825	7.59	-3.1596	1.48654e-220	1.21269e-219
EZR	13379	15223	5703	5830	308.4	299.43	120.02	115.48	303.915	117.75	-1.3679	1.54713e-220	1.26117e-219
B4GALT2	548	804	6520	7264	12.63	15.81	137.21	143.88	14.22	140.545	3.305	2.47924e-220	2.01948e-219
SLC6A6	14707	17293	5799	6653	339.01	340.14	122.04	131.78	339.575	126.91	-1.4199	2.91849e-220	2.37549e-219
NCOR1	20488	23169	8801	8737	472.27	455.72	185.21	173.06	463.995	179.135	-1.3731	5.67268e-220	4.61378e-219
RSPO3	467	571	4360	5050	10.76	11.23	91.75	100.03	10.995	95.89	3.1245	7.37422e-220	5.99321e-219
TM4SF1	2597	2807	32	48	59.86	55.21	0.67	0.95	57.535	0.81	-6.1504	1.60954e-219	1.30713e-218
RCC2	19884	21658	7830	8076	458.35	426	164.78	159.96	442.175	162.37	-1.4453	1.98782e-219	1.61314e-218
SMG1	14547	16725	7065	7429	335.32	328.97	148.68	147.15	332.145	147.915	-1.167	2.14973e-219	1.74322e-218
NEK2	2217	2799	40	48	51.1	55.05	0.84	0.95	53.075	0.895	-5.89	4.53818e-219	3.67728e-218
SKOR1	90	144	3456	3381	2.07	2.83	72.73	66.97	2.45	69.85	4.8334	4.93621e-219	3.99682e-218
BARX2	37	48	2891	2989	0.85	0.94	60.84	59.2	0.895	60.02	6.0674	6.06826e-219	4.90978e-218
PLCH2	272	347	3454	3692	6.27	6.83	72.69	73.13	6.55	72.91	3.4765	7.85696e-219	6.35226e-218
SSNA1	2499	2998	203	240	57.6	58.97	4.27	4.75	58.285	4.51	-3.6919	1.40733e-218	1.13696e-217
DDX3X	21986	26542	54076	60951	506.8	522.06	1138	1207.27	514.43	1172.63	1.1887	1.44981e-218	1.17041e-217
ADI1	1308	1470	6602	7055	30.15	28.91	138.94	139.74	29.53	139.34	2.2384	2.12213e-218	1.7119e-217
SRSF7	9830	11506	3808	3836	226.59	226.32	80.14	75.98	226.455	78.06	-1.5366	2.54526e-218	2.0517e-217
B3GNT7	644	652	6207	6048	14.84	12.82	130.62	119.79	13.83	125.205	3.1784	1.87053e-217	1.5067e-216
BAIAP2L1	204	243	3039	3369	4.7	4.78	63.95	66.73	4.74	65.34	3.785	2.18484e-217	1.75856e-216
PCNX2	419	413	4453	4750	9.66	8.12	93.71	94.08	8.89	93.895	3.4008	2.21025e-217	1.77769e-216
BPTF	12003	14060	5667	5950	276.68	276.55	119.26	117.85	276.615	118.555	-1.2223	2.65381e-217	2.13287e-216
PCSK2	303	314	3931	3916	6.98	6.18	82.73	77.57	6.58	80.15	3.6065	9.00341e-217	7.2307e-216
HECTD1	16853	19897	8442	8580	388.48	391.36	177.66	169.95	389.92	173.805	-1.1657	9.29234e-217	7.45722e-216
DDX23	9930	11456	4122	4326	228.9	225.33	86.75	85.69	227.115	86.22	-1.3973	1.30805e-216	1.04895e-215
DNAJC9	5573	6362	1107	1314	128.46	125.14	23.3	26.03	126.8	24.665	-2.362	1.82476e-216	1.46223e-215
TMEM30A	4934	6511	20591	21822	113.73	128.07	433.33	432.23	120.9	432.78	1.8398	6.0357e-216	4.83301e-215
ST8SIA6	293	333	3390	3794	6.75	6.55	71.34	75.15	6.65	73.245	3.4613	7.41521e-216	5.93326e-215
CASP2	5299	5979	1208	1355	122.15	117.6	25.42	26.84	119.875	26.13	-2.1978	9.08248e-216	7.26197e-215
ACSL1	11320	12911	4643	5078	260.94	253.95	97.71	100.58	257.445	99.145	-1.3767	1.43306e-215	1.14497e-214
CCDC30	169	173	3196	3197	3.9	3.4	67.26	63.32	3.65	65.29	4.1609	2.01665e-215	1.61006e-214
MGAT5B	100	132	2976	2919	2.31	2.6	62.63	57.82	2.455	60.225	4.6166	1.4811e-214	1.18162e-213
PPARD	1264	1489	7127	7123	29.14	29.29	149.98	141.09	29.215	145.535	2.3166	1.54869e-214	1.23463e-213
RCN2	2690	3161	10708	12232	62.01	62.17	225.34	242.28	62.09	233.81	1.9129	1.60298e-214	1.27698e-213
GGNBP2	6385	7947	1925	2083	147.18	156.31	40.51	41.26	151.745	40.885	-1.892	1.71667e-214	1.36654e-213
MSL2	6335	7350	1744	1710	146.03	144.57	36.7	33.87	145.3	35.285	-2.0419	1.94156e-214	1.54443e-213
CSPG5	309	419	4381	4292	7.12	8.24	92.2	85.01	7.68	88.605	3.5282	2.01769e-214	1.60381e-213
PPP1R1B	4913	5170	705	799	113.25	101.69	14.84	15.83	107.47	15.335	-2.809	2.59e-214	2.05722e-213
ARHGDIA	33586	40952	21135	22387	774.2	805.5	444.78	443.42	789.85	444.1	-0.8307	3.17506e-214	2.52009e-213
FANCD2	2518	2901	213	247	58.04	57.06	4.48	4.89	57.55	4.685	-3.6187	4.22192e-214	3.34854e-213
RTN4	8353	9852	20809	22389	192.55	193.78	437.92	443.46	193.165	440.69	1.1899	6.93804e-214	5.49878e-213
RCC1	4741	6020	1011	1124	109.29	118.41	21.28	22.26	113.85	21.77	-2.3867	7.12637e-214	5.64392e-213
CPXM2	2253	2432	9958	10411	51.93	47.84	209.56	206.21	49.885	207.885	2.0591	9.75891e-214	7.7232e-213
IRF5	3319	4077	554	577	76.51	80.19	11.66	11.43	78.35	11.545	-2.7627	1.34657e-213	1.0649e-212
YBX3	15083	16549	5190	5120	347.68	325.51	109.22	101.41	336.595	105.315	-1.6763	1.92415e-213	1.52055e-212
SLC2A13	478	593	4102	4441	11.02	11.66	86.32	87.96	11.34	87.14	2.9419	3.07572e-213	2.42881e-212
DNAJC3	6696	7908	18661	20710	154.35	155.55	392.71	410.21	154.95	401.46	1.3735	6.83506e-213	5.39353e-212
TSPAN4	2639	3181	10942	12595	60.83	62.57	230.27	249.47	61.7	239.87	1.9589	1.62429e-212	1.2808e-211
BMP7	833	1121	6348	6679	19.2	22.05	133.59	132.29	20.625	132.94	2.6883	1.68414e-212	1.32702e-211
TMED10	11357	13074	26706	28631	261.79	257.16	562.02	567.1	259.475	564.56	1.1215	1.76353e-212	1.38857e-211
NONO	18433	21191	9797	10559	424.9	416.81	206.17	209.14	420.855	207.655	-1.0191	2.14868e-212	1.6906e-211
ARFGEF3	327	474	4480	4847	7.54	9.32	94.28	96.01	8.43	95.145	3.4965	2.57363e-212	2.02349e-211
SDC4	6047	6816	17682	19412	139.39	134.07	372.11	384.5	136.73	378.305	1.4682	2.8998e-212	2.2783e-211
SDHA	20986	23859	11033	11895	483.75	469.29	232.18	235.61	476.52	233.895	-1.0267	4.84817e-212	3.80633e-211
SLC30A4	599	735	4514	5013	13.81	14.46	95	99.29	14.135	97.145	2.7809	5.36812e-212	4.2115e-211
DDX54	7894	9119	2932	3100	181.97	179.36	61.7	61.4	180.665	61.55	-1.5535	6.24632e-212	4.89694e-211
SLC1A6	45	45	2663	2928	1.04	0.89	56.04	58	0.965	57.02	5.8848	9.59962e-212	7.52039e-211
TRAF7	9403	11397	3735	3799	216.75	224.17	78.6	75.25	220.46	76.925	-1.519	1.3527e-211	1.05895e-210
CYP1B1	3332	4163	12182	12953	76.81	81.88	256.36	256.56	79.345	256.46	1.6925	1.62383e-211	1.27028e-210
SLC12A5	349	436	3683	3855	8.04	8.58	77.51	76.36	8.31	76.935	3.2107	2.42821e-211	1.89816e-210
CD2BP2	6907	8436	1619	1495	159.21	165.93	34.07	29.61	162.57	31.84	-2.3521	3.44175e-211	2.68853e-210
PLSCR1	1130	1496	8144	9666	26.05	29.43	171.39	191.46	27.74	181.425	2.7093	8.58508e-211	6.70142e-210
RARB	344	410	3648	3745	7.93	8.06	76.77	74.18	7.995	75.475	3.2388	2.00051e-210	1.56045e-209
TBXAS1	3496	3934	559	603	80.59	77.38	11.76	11.94	78.985	11.85	-2.7367	2.22496e-210	1.73429e-209
SEC31B	255	331	3322	3622	5.88	6.51	69.91	71.74	6.195	70.825	3.5151	2.75735e-210	2.14773e-209
FANCA	3702	4797	475	572	85.34	94.35	10	11.33	89.845	10.665	-3.0746	6.91361e-210	5.38122e-209
ITPKA	26	44	2902	3266	0.6	0.87	61.07	64.69	0.735	62.88	6.4187	9.53604e-210	7.41708e-209
LANCL3	223	315	3523	3917	5.14	6.2	74.14	77.58	5.67	75.86	3.7419	1.07141e-209	8.32739e-209
STK4	11212	12720	4628	5024	258.45	250.19	97.39	99.51	254.32	98.45	-1.3692	1.33954e-209	1.04039e-208
EPN2	2501	3136	10683	10967	57.65	61.68	224.82	217.23	59.665	221.025	1.8893	3.71728e-209	2.88508e-208
ENPEP	4582	5663	12	17	105.62	111.39	0.25	0.34	108.505	0.295	-8.5228	5.63257e-209	4.36846e-208
NECAP1	1754	2131	7732	8110	40.43	41.92	162.72	160.64	41.175	161.68	1.9733	7.19742e-209	5.57813e-208
BUB3	9224	11187	3867	4064	212.62	220.04	81.38	80.5	216.33	80.94	-1.4183	7.48015e-209	5.79311e-208
FAM135A	794	925	5063	5704	18.3	18.19	106.55	112.98	18.245	109.765	2.5888	1.93662e-208	1.49877e-207
TTYH1	550	719	4773	4941	12.68	14.14	100.45	97.87	13.41	99.16	2.8864	1.97719e-208	1.52908e-207
WDR1	19295	23307	10462	11461	444.77	458.43	220.17	227.01	451.6	223.59	-1.0142	2.57331e-208	1.98868e-207
CSDE1	10439	11893	25673	27900	240.63	233.93	540.28	552.62	237.28	546.45	1.2035	5.47383e-208	4.22723e-207
EDA	296	356	3864	3748	6.82	7	81.32	74.24	6.91	77.78	3.4926	5.62581e-208	4.34151e-207
SLC38A9	4194	4911	900	1006	96.68	96.6	18.94	19.93	96.64	19.435	-2.314	2.63407e-207	2.03131e-206
MDGA2	69	49	2943	3127	1.59	0.96	61.93	61.94	1.275	61.935	5.6022	1.0877e-206	8.38204e-206
BCAP29	511	649	4250	4621	11.78	12.77	89.44	91.53	12.275	90.485	2.882	1.13107e-206	8.71005e-206
KIT	4169	4999	963	987	96.1	98.33	20.27	19.55	97.215	19.91	-2.2877	1.55699e-206	1.19814e-205
RAB9B	28	44	2887	2957	0.65	0.87	60.76	58.57	0.76	59.665	6.2947	2.41514e-206	1.85719e-205
C1QB	5931	6990	1468	1393	136.72	137.49	30.89	27.59	137.105	29.24	-2.2293	4.59652e-206	3.53213e-205
PRKAR1B	1242	1502	6249	6615	28.63	29.54	131.51	131.02	29.085	131.265	2.1741	4.77555e-206	3.66711e-205
TUBGCP6	6194	7228	1959	1997	142.78	142.17	41.23	39.56	142.475	40.395	-1.8185	4.84265e-206	3.71601e-205
GPSM2	4636	5041	15739	17205	106.87	99.15	331.22	340.78	103.01	336	1.7057	5.2124e-206	3.99691e-205
ASTN1	131	164	2687	2821	3.02	3.23	56.55	55.88	3.125	56.215	4.169	1.43299e-205	1.09805e-204
BRPF1	7753	8474	1993	2261	178.72	166.68	41.94	44.78	172.7	43.36	-1.9938	1.78121e-205	1.36392e-204
RASSF9	131	137	2647	2915	3.02	2.69	55.7	57.74	2.855	56.72	4.3123	1.81883e-205	1.39174e-204
MPP7	760	998	5746	6586	17.52	19.63	120.92	130.45	18.575	125.685	2.7584	2.73719e-205	2.09299e-204
ARHGEF39	2185	2368	50	63	50.37	46.58	1.05	1.25	48.475	1.15	-5.3975	3.36512e-205	2.57132e-204
RPS21	10128	12121	4526	4893	233.46	238.41	95.25	96.92	235.935	96.085	-1.296	5.24308e-205	4.00347e-204
CAPZA1	11014	13575	4195	4746	253.89	267.01	88.28	94.01	260.45	91.145	-1.5148	9.28461e-205	7.08449e-204
TRPC1	248	212	4182	4431	5.72	4.17	88.01	87.77	4.945	87.89	4.1517	1.01942e-204	7.7731e-204
TAPT1	8302	10174	2328	2749	191.37	200.12	48.99	54.45	195.745	51.72	-1.9202	1.99732e-204	1.52189e-203
CDO1	1873	2480	9794	10545	43.17	48.78	206.11	208.87	45.975	207.49	2.1741	2.30689e-204	1.75653e-203
FRYL	18564	21541	9127	10211	427.92	423.7	192.07	202.25	425.81	197.16	-1.1108	1.01556e-203	7.72736e-203
RARRES1	193	232	2860	3189	4.45	4.56	60.19	63.17	4.505	61.68	3.7752	1.2559e-203	9.54939e-203
EIF3B	14823	17075	7194	7892	341.69	335.85	151.39	156.32	338.77	153.855	-1.1387	1.30252e-203	9.89696e-203
YKT6	7418	8248	2309	2396	170.99	162.23	48.59	47.46	166.61	48.025	-1.7946	1.76645e-203	1.34127e-202
SEPTIN2	6571	8279	1998	2181	151.47	162.84	42.05	43.2	157.155	42.625	-1.8824	1.82499e-203	1.38475e-202
ELP2	4008	4808	917	971	92.39	94.57	19.3	19.23	93.48	19.265	-2.2787	2.14955e-203	1.62988e-202
DLX3	2193	2394	40	46	50.55	47.09	0.84	0.91	48.82	0.875	-5.802	2.3417e-203	1.77433e-202
ADARB1	4044	5133	793	787	93.22	100.96	16.69	15.59	97.09	16.14	-2.5887	3.1164e-203	2.35968e-202
TECTB	220	195	13476	14349	5.07	3.84	283.6	284.21	4.455	283.905	5.9938	3.13496e-203	2.37209e-202
HDLBP	26104	30652	53728	55963	601.73	602.91	1130.68	1108.47	602.32	1119.58	0.8943	3.90304e-203	2.9512e-202
SMAD4	5096	5768	1200	1182	117.47	113.45	25.25	23.41	115.46	24.33	-2.2466	1.07009e-202	8.0856e-202
PHF10	4518	5483	1073	1063	104.15	107.85	22.58	21.06	106	21.82	-2.2803	1.16029e-202	8.76106e-202
TMEM119	4964	5426	1062	1103	114.43	106.73	22.35	21.85	110.58	22.1	-2.323	2.06956e-202	1.56159e-201
SCRN1	861	866	6171	6508	19.85	17.03	129.87	128.91	18.44	129.39	2.8108	2.82132e-202	2.12735e-201
SLC25A13	628	779	4713	4827	14.48	15.32	99.18	95.61	14.9	97.395	2.7085	2.96183e-202	2.23175e-201
ANO1	3709	4156	444	387	85.5	81.75	9.34	7.67	83.625	8.505	-3.2976	3.12199e-202	2.35081e-201
FAM89A	17	38	3143	3405	0.39	0.75	66.14	67.44	0.57	66.79	6.8725	3.2043e-202	2.41111e-201
EMP1	4287	5260	726	879	98.82	103.46	15.28	17.41	101.14	16.345	-2.6294	4.46767e-202	3.35942e-201
SIK3	6959	8304	2386	2648	160.41	163.33	50.21	52.45	161.87	51.33	-1.657	6.62112e-202	4.97524e-201
MYO6	4705	5773	15972	18180	108.46	113.55	336.12	360.1	111.005	348.11	1.6489	8.7643e-202	6.58111e-201
MAU2	11943	14004	5561	6108	275.3	275.45	117.03	120.98	275.375	119.005	-1.2104	1.27099e-201	9.53726e-201
SMAP2	8654	10272	3483	3826	199.48	202.04	73.3	75.78	200.76	74.54	-1.4294	3.05949e-201	2.29419e-200
DPP4	3755	4635	472	597	86.56	91.17	9.93	11.82	88.865	10.875	-3.0306	4.66988e-201	3.49935e-200
SENP1	5020	5695	751	650	115.72	112.02	15.8	12.87	113.87	14.335	-2.9898	7.3765e-201	5.52372e-200
MOK	130	120	2843	3296	3	2.36	59.83	65.28	2.68	62.555	4.5448	1.17623e-200	8.80186e-200
GPCPD1	8288	10025	3086	3439	191.05	197.19	64.94	68.12	194.12	66.53	-1.5449	1.23239e-200	9.2158e-200
RPL15	18508	22175	39680	41725	426.63	436.17	835.05	826.46	431.4	830.755	0.9454	1.3726e-200	1.02572e-199
ARHGAP31	6953	7652	1990	2055	160.27	150.51	41.88	40.7	155.39	41.29	-1.912	4.22893e-200	3.15803e-199
GP5	5139	5752	527	415	118.46	113.14	11.09	8.22	115.8	9.655	-3.5842	5.33028e-200	3.97775e-199
CHRNA4	240	233	3368	3503	5.53	4.58	70.88	69.38	5.055	70.13	3.7942	1.29572e-199	9.66274e-199
CHFR	5212	6447	1439	1577	120.14	126.81	30.28	31.24	123.475	30.76	-2.0051	1.55058e-199	1.15554e-198
SLC36A1	4169	4886	994	1027	96.1	96.1	20.92	20.34	96.1	20.63	-2.2198	2.5813e-199	1.92234e-198
RPA1	11660	13537	5143	5202	268.78	266.26	108.23	103.04	267.52	105.635	-1.3406	2.76675e-199	2.05904e-198
LAPTM4A	15725	18188	34654	37894	362.48	357.75	729.28	750.57	360.115	739.925	1.0389	5.27472e-199	3.92281e-198
CARD9	3055	3432	430	471	70.42	67.51	9.05	9.33	68.965	9.19	-2.9077	6.9099e-199	5.13537e-198
MCRIP1	3858	4218	13205	14110	88.93	82.97	277.89	279.48	85.95	278.685	1.6971	3.72318e-198	2.76514e-197
GLB1L2	52	80	2528	2965	1.2	1.57	53.2	58.73	1.385	55.965	5.3366	4.07939e-198	3.02762e-197
PTPRS	27618	32249	17556	18988	636.63	634.32	369.46	376.1	635.475	372.78	-0.7695	4.48339e-198	3.32518e-197
LATS2	5475	6431	1680	1818	126.2	126.49	35.35	36.01	126.345	35.68	-1.8242	8.03752e-198	5.95709e-197
SLC2A1	4855	5430	15225	15796	111.91	106.8	320.4	312.87	109.355	316.635	1.5338	1.37295e-197	1.01688e-196
OPCML	99	104	2509	2589	2.28	2.05	52.8	51.28	2.165	52.04	4.5872	1.83578e-197	1.35876e-196
ERICH3	563	692	4305	4454	12.98	13.61	90.6	88.22	13.295	89.41	2.7496	3.21038e-197	2.37455e-196
MPND	4080	4917	974	1003	94.05	96.71	20.5	19.87	95.38	20.185	-2.2404	3.77293e-197	2.78873e-196
SLC17A8	196	314	4057	4435	4.52	6.18	85.38	87.85	5.35	86.615	4.017	8.56423e-197	6.32588e-196
CORO2B	1036	1178	7308	6918	23.88	23.17	153.79	137.03	23.525	145.41	2.6279	1.79604e-196	1.32573e-195
MTCL1	871	1024	5060	5303	20.08	20.14	106.49	105.04	20.11	105.765	2.3949	2.11412e-196	1.55945e-195
SH3TC1	2065	2341	134	138	47.6	46.05	2.82	2.73	46.825	2.775	-4.0767	3.93614e-196	2.90147e-195
NOL4L	2071	2455	158	171	47.74	48.29	3.33	3.39	48.015	3.36	-3.837	5.16061e-196	3.80149e-195
ELMO1	5817	6773	1892	1990	134.09	133.22	39.82	39.42	133.655	39.62	-1.7542	1.25426e-195	9.23307e-195
NMNAT2	1041	1221	5667	5832	24	24.02	119.26	115.52	24.01	117.39	2.2896	3.34769e-195	2.46268e-194
IRF9	5554	6088	1262	1419	128.03	119.75	26.56	28.11	123.89	27.335	-2.1802	3.98833e-195	2.93197e-194
UBE2V1	8640	9641	3048	3306	199.16	189.63	64.14	65.48	194.395	64.81	-1.5847	6.33647e-195	4.65503e-194
ZC3H18	7146	8003	2217	2232	164.72	157.41	46.66	44.21	161.065	45.435	-1.8258	7.50317e-195	5.50841e-194
MAP2K3	8066	9688	3305	3555	185.93	190.56	69.55	70.41	188.245	69.98	-1.4276	8.11715e-195	5.95514e-194
FZD6	401	447	3793	4452	9.24	8.79	79.82	88.18	9.015	84	3.22	1.40902e-194	1.03303e-193
KLF4	3249	4015	534	513	74.89	78.97	11.24	10.16	76.93	10.7	-2.8459	1.4484e-194	1.06118e-193
PLXND1	15884	18586	6830	6654	366.14	365.57	143.73	131.8	365.855	137.765	-1.4091	1.71021e-194	1.25216e-193
GPNMB	2534	2876	19	28	58.41	56.57	0.4	0.55	57.49	0.475	-6.9192	2.23372e-194	1.63435e-193
PRDM11	2214	2551	8869	9062	51.04	50.18	186.64	179.49	50.61	183.065	1.8549	2.27737e-194	1.66517e-193
DNMBP	2088	2731	10280	10588	48.13	53.72	216.34	209.72	50.925	213.03	2.0646	3.94401e-194	2.88183e-193
FSCN1	1917	2383	8693	8846	44.19	46.87	182.94	175.21	45.53	179.075	1.9757	4.24443e-194	3.09926e-193
DIAPH3	2309	2405	44	37	53.23	47.3	0.93	0.73	50.265	0.83	-5.9203	4.97377e-194	3.62938e-193
SHTN1	787	962	4959	5600	18.14	18.92	104.36	110.92	18.53	107.64	2.5383	5.97664e-194	4.35825e-193
COMT	2140	2509	8250	9150	49.33	49.35	173.62	181.24	49.34	177.43	1.8464	6.78137e-194	4.94176e-193
PREB	8038	9078	2893	2978	185.29	178.56	60.88	58.99	181.925	59.935	-1.6019	7.85861e-194	5.72292e-193
VEGFA	3550	4206	500	441	81.83	82.73	10.52	8.73	82.28	9.625	-3.0957	1.21937e-193	8.87395e-193
BUB1	2251	2895	83	55	51.89	56.94	1.75	1.09	54.415	1.42	-5.26	1.80688e-193	1.31407e-192
ALKBH5	6322	7409	16406	17582	145.73	145.73	345.26	348.25	145.73	346.755	1.2506	2.21005e-193	1.60621e-192
RELA	5577	6413	1360	1291	128.56	126.14	28.62	25.57	127.35	27.095	-2.2327	3.70103e-193	2.68801e-192
ABCB6	5695	6472	1654	1678	131.28	127.3	34.81	33.24	129.29	34.025	-1.9259	4.71515e-193	3.42227e-192
RTEL1	3699	4640	564	507	85.27	91.27	11.87	10.04	88.27	10.955	-3.0103	6.39714e-193	4.63996e-192
SOX8	1356	1702	6747	7472	31.26	33.48	141.99	148	32.37	144.995	2.1633	7.18646e-193	5.20899e-192
PLD1	1522	1792	7114	8138	35.08	35.25	149.71	161.19	35.165	155.45	2.1442	8.33931e-193	6.04058e-192
SHPK	260	288	3301	3276	5.99	5.66	69.47	64.89	5.825	67.18	3.5277	9.65591e-193	6.98959e-192
NLGN3	296	319	3282	3388	6.82	6.27	69.07	67.11	6.545	68.09	3.379	1.00164e-192	7.24568e-192
PSAT1	3848	4503	697	821	88.7	88.57	14.67	16.26	88.635	15.465	-2.5189	1.18487e-192	8.56542e-192
STIL	2510	2793	164	132	57.86	54.94	3.45	2.61	56.4	3.03	-4.2183	1.33458e-192	9.64127e-192
SZRD1	10290	11434	3893	4007	237.2	224.9	81.93	79.37	231.05	80.65	-1.5185	1.56476e-192	1.12966e-191
SETD1A	7843	8965	2948	3190	180.79	176.34	62.04	63.19	178.565	62.615	-1.5119	1.86062e-192	1.34237e-191
FSD1L	319	312	3611	4010	7.35	6.14	75.99	79.43	6.745	77.71	3.5262	2.17814e-192	1.5704e-191
SLC11A1	2379	2815	183	233	54.84	55.37	3.85	4.62	55.105	4.235	-3.7017	2.72235e-192	1.96146e-191
MTA1	2152	2660	8552	9331	49.61	52.32	179.97	184.82	50.965	182.395	1.8395	2.96245e-192	2.13304e-191
HIF1A	3872	4953	14654	16449	89.25	97.42	308.39	325.81	93.335	317.1	1.7644	6.79375e-192	4.88844e-191
NOC2L	8479	9531	2948	2963	195.45	187.47	62.04	58.69	191.46	60.365	-1.6653	7.88618e-192	5.67074e-191
UBTD2	867	1006	4915	5229	19.99	19.79	103.43	103.57	19.89	103.5	2.3795	1.33828e-191	9.61686e-191
ZBTB18	5648	6800	1857	1934	130.19	133.75	39.08	38.31	131.97	38.695	-1.77	2.23892e-191	1.60782e-190
CCT5	14714	17452	7748	8489	339.17	343.27	163.05	168.14	341.22	165.595	-1.043	3.59804e-191	2.58213e-190
ACSL4	2135	2569	8394	9379	49.21	50.53	176.65	185.77	49.87	181.21	1.8614	1.31136e-190	9.40473e-190
ACTA2	3985	4787	970	1005	91.86	94.16	20.41	19.91	93.01	20.16	-2.2059	1.48631e-190	1.06524e-189
HACD4	1858	2339	102	106	42.83	46.01	2.15	2.1	44.42	2.125	-4.3857	2.74984e-190	1.96951e-189
MED13L	11605	13901	4556	5242	267.51	273.42	95.88	103.83	270.465	99.855	-1.4375	3.18294e-190	2.2782e-189
DONSON	2216	2603	197	183	51.08	51.2	4.15	3.62	51.14	3.885	-3.7185	4.40585e-190	3.15143e-189
SLC8A3	3455	3572	378	368	79.64	70.26	7.95	7.29	74.95	7.62	-3.2981	1.63633e-189	1.16967e-188
PLOD1	3839	4040	14633	15512	88.49	79.46	307.94	307.25	83.975	307.595	1.873	2.21901e-189	1.58513e-188
RUFY3	1846	2186	7611	7875	42.55	43	160.17	155.98	42.775	158.075	1.8858	3.96038e-189	2.82721e-188
OLFM4	2065	2544	24	39	47.6	50.04	0.51	0.77	48.82	0.64	-6.2533	4.33622e-189	3.09347e-188
AEBP2	3970	4825	964	1031	91.51	94.9	20.29	20.42	93.205	20.355	-2.195	4.42304e-189	3.15334e-188
NCKIPSD	865	993	4980	5187	19.94	19.53	104.8	102.74	19.735	103.77	2.3946	7.01714e-189	4.99948e-188
CDC25A	3643	3860	495	553	83.98	75.92	10.42	10.95	79.95	10.685	-2.9035	1.02422e-188	7.29248e-188
TRAM2	370	512	4000	4251	8.53	10.07	84.18	84.2	9.3	84.19	3.1783	1.38909e-188	9.88384e-188
CD81	10718	12774	24518	26515	247.06	251.26	515.97	525.19	249.16	520.58	1.063	1.643e-188	1.16829e-187
HHIPL1	20	26	3206	3189	0.46	0.51	67.47	63.17	0.485	65.32	7.0734	1.76795e-188	1.25631e-187
IRF8	12366	15079	6163	6427	285.05	296.59	129.7	127.3	290.82	128.5	-1.1784	7.20427e-188	5.11602e-187
MMP17	312	340	3396	3420	7.19	6.69	71.47	67.74	6.94	69.605	3.3262	7.47287e-188	5.3033e-187
NADK	13752	16170	4624	5531	317	318.05	97.31	109.55	317.525	103.43	-1.6182	7.70176e-188	5.46216e-187
MAGI3	745	905	4684	5268	17.17	17.8	98.57	104.34	17.485	101.455	2.5367	9.97381e-188	7.06891e-187
SMG5	9661	11067	4120	4247	222.7	217.68	86.7	84.12	220.19	85.41	-1.3663	1.28012e-187	9.06692e-187
ELMOD1	138	216	3266	3318	3.18	4.25	68.73	65.72	3.715	67.225	4.1776	1.30253e-187	9.21959e-187
BEND7	180	147	3478	3886	4.15	2.89	73.19	76.97	3.52	75.08	4.4148	1.85892e-187	1.31493e-186
ENDOD1	8385	9701	3424	3725	193.28	190.81	72.06	73.78	192.045	72.92	-1.3971	2.02386e-187	1.43067e-186
CNKSR2	61	99	2455	2672	1.41	1.95	51.66	52.92	1.68	52.29	4.96	2.2296e-187	1.57508e-186
SLC40A1	8853	10217	3337	3757	204.07	200.96	70.23	74.42	202.515	72.325	-1.4855	4.74519e-187	3.35001e-186
DTNA	1946	2102	8315	8813	44.86	41.35	174.99	174.56	43.105	174.775	2.0196	4.90124e-187	3.45794e-186
JADE2	3428	4189	12286	12459	79.02	82.39	258.55	246.78	80.705	252.665	1.6465	1.10241e-186	7.7727e-186
SLC4A4	495	735	16815	18115	11.41	14.46	353.86	358.81	12.935	356.335	4.7839	1.56828e-186	1.10503e-185
XK	2429	2987	119	176	55.99	58.75	2.5	3.49	57.37	2.995	-4.2597	2.1865e-186	1.53963e-185
MTMR10	1570	1860	7056	7214	36.19	36.59	148.49	142.89	36.39	145.69	2.0013	2.64459e-186	1.86098e-185
CRABP1	20	33	3020	2944	0.46	0.65	63.55	58.31	0.555	60.93	6.7785	2.70714e-186	1.90377e-185
FBXO45	1552	1831	6856	7076	35.78	36.01	144.28	140.16	35.895	142.22	1.9863	2.72423e-186	1.91454e-185
GIPC3	432	453	3970	4013	9.96	8.91	83.55	79.49	9.435	81.52	3.1111	3.86568e-186	2.71498e-185
SHC1	11603	14104	4921	4862	267.46	277.42	103.56	96.3	272.44	99.93	-1.4469	4.26486e-186	2.9934e-185
IGSF9	774	812	5568	5533	17.84	15.97	117.18	109.59	16.905	113.385	2.7457	8.13071e-186	5.70305e-185
EDIL3	491	584	3751	4177	11.32	11.49	78.94	82.73	11.405	80.835	2.8253	9.88256e-186	6.92736e-185
SEC24A	1455	1626	6537	7184	33.54	31.98	137.57	142.3	32.76	139.935	2.0947	9.90433e-186	6.93814e-185
HEPACAM	241	283	3450	3276	5.56	5.57	72.6	64.89	5.565	68.745	3.6268	1.09099e-185	7.63765e-185
FHOD1	6255	6845	1554	1512	144.18	134.64	32.7	29.95	139.41	31.325	-2.1539	1.49003e-185	1.04244e-184
PRELID3A	135	167	2438	2682	3.11	3.28	51.31	53.12	3.195	52.215	4.0306	1.90688e-185	1.33322e-184
GATA3	668	825	4371	4740	15.4	16.23	91.99	93.89	15.815	92.94	2.555	2.29732e-185	1.60517e-184
SYT9	336	442	3475	3875	7.75	8.69	73.13	76.75	8.22	74.94	3.1885	2.60738e-185	1.82064e-184
SMIM19	646	700	4335	4699	14.89	13.77	91.23	93.07	14.33	92.15	2.6849	2.75481e-185	1.92235e-184
MSL1	9157	10848	3507	3441	211.08	213.37	73.8	68.16	212.225	70.98	-1.5801	3.57316e-185	2.4918e-184
ARF4	3657	4184	11302	12314	84.3	82.3	237.85	243.91	83.3	240.88	1.5319	3.69099e-185	2.57232e-184
IFT140	10874	12496	3812	4441	250.66	245.79	80.22	87.96	248.225	84.09	-1.5616	4.90575e-185	3.41672e-184
PCSK5	1826	2097	7315	8069	42.09	41.25	153.94	159.82	41.67	156.88	1.9126	5.48298e-185	3.81629e-184
TMEM144	73	112	2440	2797	1.68	2.2	51.35	55.4	1.94	53.375	4.782	6.75483e-185	4.69853e-184
RNFT2	563	633	4018	4205	12.98	12.45	84.56	83.29	12.715	83.925	2.7226	9.12487e-185	6.34301e-184
SH3BP2	3447	4253	706	774	79.46	83.65	14.86	15.33	81.555	15.095	-2.4337	1.0204e-184	7.08859e-184
PUF60	11800	14076	6031	6292	272	276.87	126.92	124.63	274.435	125.775	-1.1256	1.46928e-184	1.02004e-183
KNTC1	4703	5209	1105	1117	108.41	102.46	23.25	22.12	105.435	22.685	-2.2165	2.2836e-184	1.58437e-183
SCN3B	111	88	24078	24619	2.56	1.73	506.71	487.63	2.145	497.17	7.8566	5.2505e-184	3.64048e-183
PIK3R2	2376	3075	10861	11043	54.77	60.48	228.56	218.73	57.625	223.645	1.9564	1.11114e-183	7.6993e-183
OTOS	34865	42271	23303	24311	803.68	831.44	490.4	481.53	817.56	485.965	-0.7505	3.17635e-183	2.19954e-182
OLFML3	4470	5111	14840	14892	103.04	100.53	312.3	294.97	101.785	303.635	1.5768	3.33807e-183	2.31006e-182
NRBP1	6860	7872	2364	2376	158.13	154.84	49.75	47.06	156.485	48.405	-1.6928	3.35004e-183	2.31686e-182
RHOH	2352	2961	253	236	54.22	58.24	5.32	4.67	56.23	4.995	-3.4928	5.5384e-183	3.82788e-182
SCARB1	5570	6279	1611	1771	128.39	123.5	33.9	35.08	125.945	34.49	-1.8685	6.51821e-183	4.50221e-182
TRABD2B	434	476	3583	3778	10	9.36	75.4	74.83	9.68	75.115	2.956	8.50797e-183	5.87282e-182
MAST3	4637	5787	1272	1367	106.89	113.83	26.77	27.08	110.36	26.925	-2.0352	1.49838e-182	1.03364e-181
MYO1C	16051	18091	8080	8483	369.99	355.84	170.04	168.02	362.915	169.03	-1.1024	1.55092e-182	1.0692e-181
HNRNPAB	23466	28446	13848	14168	540.92	559.51	291.42	280.63	550.215	286.025	-0.9439	1.62974e-182	1.12283e-181
PRIM2	2687	2887	292	310	61.94	56.79	6.15	6.14	59.365	6.145	-3.2721	1.79618e-182	1.23671e-181
GPC6	2095	2468	149	126	48.29	48.54	3.14	2.5	48.415	2.82	-4.1017	1.91942e-182	1.32073e-181
SERPINF1	18972	22319	11426	11911	437.33	439	240.45	235.92	438.165	238.185	-0.8794	2.63936e-182	1.81496e-181
LYSMD2	255	306	3069	3644	5.88	6.02	64.59	72.18	5.95	68.385	3.5227	4.88894e-182	3.35976e-181
BIRC2	2883	3582	10446	11607	66.46	70.46	219.83	229.9	68.46	224.865	1.7157	5.24888e-182	3.60483e-181
SGO1	1871	2186	38	59	43.13	43	0.8	1.17	43.065	0.985	-5.4502	5.49444e-182	3.77109e-181
LHFPL1	9	20	4301	4895	0.21	0.39	90.51	96.96	0.3	93.735	8.2875	1.07555e-181	7.3773e-181
EHD4	6283	7332	2299	2433	144.83	144.22	48.38	48.19	144.525	48.285	-1.5817	1.17751e-181	8.07157e-181
UNC119	3128	3899	572	629	72.1	76.69	12.04	12.46	74.395	12.25	-2.6024	1.2191e-181	8.35143e-181
AFDN	3198	4047	11837	12315	73.72	79.6	249.1	243.93	76.66	246.515	1.6851	1.95461e-181	1.33815e-180
POLG	8577	9910	3255	3227	197.71	194.92	68.5	63.92	196.315	66.21	-1.568	2.08037e-181	1.42336e-180
UBP1	12038	14500	4910	5647	277.49	285.21	103.33	111.85	281.35	107.59	-1.3868	3.7694e-181	2.57734e-180
GRID2IP	167	213	2867	2812	3.85	4.19	60.33	55.7	4.02	58.015	3.8512	5.429e-181	3.70976e-180
GNS	10851	12905	27006	30410	250.13	253.83	568.33	602.34	251.98	585.335	1.216	6.90946e-181	4.71842e-180
MYO9A	2642	3195	10081	10192	60.9	62.84	212.15	201.88	61.87	207.015	1.7424	8.28439e-181	5.6538e-180
LY75	1987	2252	7676	8083	45.8	44.3	161.54	160.1	45.05	160.82	1.8358	2.39168e-180	1.63121e-179
HNRNPA3	9047	10672	21026	22721	208.54	209.91	442.48	450.04	209.225	446.26	1.0928	3.27124e-180	2.2297e-179
BICRA	5533	6839	1639	1615	127.54	134.52	34.49	31.99	131.03	33.24	-1.9789	4.88671e-180	3.32872e-179
HS6ST3	49	68	2201	2299	1.13	1.34	46.32	45.54	1.235	45.93	5.2169	5.45495e-180	3.71347e-179
FOXO1	4438	5382	1001	940	102.3	105.86	21.07	18.62	104.08	19.845	-2.3908	6.89844e-180	4.69319e-179
IQCE	1848	2049	7530	8294	42.6	40.3	158.47	164.28	41.45	161.375	1.961	8.49656e-180	5.77681e-179
C4A	106	79	2880	3250	2.44	1.55	60.61	64.37	1.995	62.49	4.9692	1.39248e-179	9.46151e-179
COMP	4552	5345	1147	1311	104.93	105.13	24.14	25.97	105.03	25.055	-2.0676	1.67793e-179	1.1394e-178
DCBLD2	1464	1879	7184	7987	33.75	36.96	151.18	158.2	35.355	154.69	2.1294	1.72063e-179	1.16766e-178
KANK4	1638	1988	7860	7802	37.76	39.1	165.41	154.54	38.43	159.975	2.0575	2.20641e-179	1.49639e-178
NHS	233	310	3205	3198	5.37	6.1	67.45	63.34	5.735	65.395	3.5113	2.22306e-179	1.50674e-178
SOX4	4004	4899	923	897	92.3	96.36	19.42	17.77	94.33	18.595	-2.3428	2.59635e-179	1.75865e-178
LRRC20	1906	2263	138	159	43.94	44.51	2.9	3.15	44.225	3.025	-3.8699	3.44372e-179	2.33117e-178
FGFR1OP2	6103	7031	2030	2244	140.68	138.3	42.72	44.45	139.49	43.585	-1.6783	3.53016e-179	2.38819e-178
RPL14	4747	5163	15045	16440	109.42	101.55	316.62	325.63	105.485	321.125	1.6061	3.71924e-179	2.51454e-178
EPYC	1560	2072	8502	9693	35.96	40.75	178.92	191.99	38.355	185.455	2.2736	5.02255e-179	3.39358e-178
RAP1GAP2	3700	4417	887	957	85.29	86.88	18.67	18.96	86.085	18.815	-2.1939	5.74293e-179	3.87791e-178
POLR3C	3100	3815	584	643	71.46	75.04	12.29	12.74	73.25	12.515	-2.5492	5.92208e-179	3.99639e-178
IL17RD	726	790	4565	5122	16.74	15.54	96.07	101.45	16.14	98.76	2.6133	7.7108e-179	5.20024e-178
ATOH8	416	510	3646	3704	9.59	10.03	76.73	73.37	9.81	75.05	2.9355	8.84767e-179	5.96325e-178
CAPN2	7739	8754	2956	3157	178.39	172.19	62.21	62.53	175.29	62.37	-1.4908	9.93029e-179	6.68878e-178
PRODH	611	618	4777	4884	14.08	12.16	100.53	96.74	13.12	98.635	2.9103	1.15198e-178	7.75461e-178
IPO4	3575	3985	11372	12234	82.41	78.38	239.32	242.32	80.395	240.82	1.5828	3.27969e-178	2.20637e-177
OTOP1	266	291	2929	3340	6.13	5.72	61.64	66.16	5.925	63.9	3.4309	3.33414e-178	2.24162e-177
HACD3	2694	2968	9784	10854	62.1	58.38	205.9	214.99	60.24	210.445	1.8046	8.04591e-178	5.4061e-177
PPDPF	1470	1680	6856	6922	33.89	33.04	144.28	137.11	33.465	140.695	2.0718	1.62701e-177	1.09252e-176
RFLNA	296	352	3059	3155	6.82	6.92	64.38	62.49	6.87	63.435	3.2069	1.86846e-177	1.25387e-176
AGGF1	3936	4568	984	1013	90.73	89.85	20.71	20.06	90.29	20.385	-2.1471	2.28777e-177	1.53432e-176
BICD1	222	217	2896	3195	5.12	4.27	60.94	63.28	4.695	62.11	3.7256	3.11184e-177	2.0857e-176
FOSL2	5134	6067	1084	1324	118.34	119.33	22.81	26.22	118.835	24.515	-2.2772	3.18337e-177	2.13233e-176
ZFPL1	1869	2378	136	149	43.08	46.77	2.86	2.95	44.925	2.905	-3.9509	4.20921e-177	2.81773e-176
RAVER2	241	355	3478	3750	5.56	6.98	73.19	74.28	6.27	73.735	3.5558	8.25941e-177	5.52561e-176
VCP	23880	27963	15612	16698	550.46	550.01	328.55	330.74	550.235	329.645	-0.7391	1.1263e-176	7.53039e-176
MGMT	404	521	3640	3773	9.31	10.25	76.6	74.73	9.78	75.665	2.9517	1.29327e-176	8.64142e-176
DES	2756	2952	309	298	63.53	58.06	6.5	5.9	60.795	6.2	-3.2936	1.47646e-176	9.85943e-176
NOS1	1699	2009	86	90	39.16	39.52	1.81	1.78	39.34	1.795	-4.4539	1.74171e-176	1.16235e-175
NIPAL2	145	187	2523	2959	3.34	3.68	53.1	58.61	3.51	55.855	3.9921	1.96384e-176	1.30979e-175
CTNNBIP1	636	760	4061	4350	14.66	14.95	85.46	86.16	14.805	85.81	2.5351	3.72898e-176	2.48553e-175
SPAG5	8730	9435	262	213	201.24	185.58	5.51	4.22	193.41	4.865	-5.3131	4.64575e-176	3.09469e-175
CMTR1	10913	12536	5184	5373	251.56	246.58	109.09	106.42	249.07	107.755	-1.2088	5.98699e-176	3.9857e-175
MOB3A	5524	6626	1917	2051	127.33	130.33	40.34	40.62	128.83	40.48	-1.6702	6.3714e-176	4.23901e-175
FANCI	1941	2263	163	178	44.74	44.51	3.43	3.53	44.625	3.48	-3.6807	7.52955e-176	5.00648e-175
COPG2	3576	4272	10913	11511	82.43	84.03	229.66	228	83.23	228.83	1.4591	8.14398e-176	5.41171e-175
ADAMTSL1	1200	1554	6532	6768	27.66	30.57	137.46	134.06	29.115	135.76	2.2212	9.43637e-176	6.26667e-175
CMYA5	1675	1961	66	64	38.61	38.57	1.39	1.27	38.59	1.33	-4.8587	1.07646e-175	7.1444e-175
BORA	1810	2310	124	129	41.72	45.44	2.61	2.56	43.58	2.585	-4.0754	1.11925e-175	7.4238e-175
NEDD9	7320	8205	2618	2709	168.73	161.39	55.09	53.66	165.06	54.375	-1.602	1.26324e-175	8.37381e-175
RPL37	20850	23908	12116	12555	480.62	470.26	254.98	248.68	475.44	251.83	-0.9168	1.38486e-175	9.17437e-175
GALE	904	1005	4878	5334	20.84	19.77	102.66	105.65	20.305	104.155	2.3588	1.67221e-175	1.10712e-174
SLC47A2	31	52	2309	2369	0.71	1.02	48.59	46.92	0.865	47.755	5.7868	1.76902e-175	1.17051e-174
HPS6	847	901	5232	5344	19.52	17.72	110.11	105.85	18.62	107.98	2.5358	2.2235e-175	1.47033e-174
IRAK2	2080	2464	7788	8654	47.95	48.47	163.89	171.41	48.21	167.65	1.798	2.30994e-175	1.52655e-174
BACE2	1302	1597	6344	7251	30.01	31.41	133.51	143.62	30.71	138.565	2.1738	2.37928e-175	1.57143e-174
STK26	1786	2334	8556	9571	41.17	45.91	180.06	189.57	43.54	184.815	2.0857	2.56777e-175	1.69488e-174
LSM6	2606	2990	357	407	60.07	58.81	7.51	8.06	59.44	7.785	-2.9327	3.49797e-175	2.30747e-174
SNCA	16467	18690	6922	7971	379.58	367.62	145.67	157.88	373.6	151.775	-1.2996	3.66763e-175	2.41792e-174
CCDC186	2061	2415	8359	9651	47.51	47.5	175.91	191.16	47.505	183.535	1.9499	4.10717e-175	2.70605e-174
SEMA3C	344	427	3219	3639	7.93	8.4	67.74	72.08	8.165	69.91	3.098	4.36998e-175	2.87746e-174
SLC1A3	3378	4209	11551	12833	77.87	82.79	243.09	254.19	80.33	248.64	1.63	4.42162e-175	2.90969e-174
LARP4B	7835	9072	2745	3141	180.61	178.44	57.77	62.21	179.525	59.99	-1.5814	4.81498e-175	3.16663e-174
ADCY1	1965	2524	25	26	45.3	49.65	0.53	0.51	47.475	0.52	-6.5125	5.95152e-175	3.91172e-174
KTN1	2757	3347	9288	9893	63.55	65.83	195.46	195.95	64.69	195.705	1.5971	6.93029e-175	4.55228e-174
DNTT	2253	2498	65	108	51.93	49.13	1.37	2.14	50.53	1.755	-4.8476	1.24239e-174	8.15593e-174
DCAF8	11022	13493	5420	5667	254.07	265.4	114.06	112.25	259.735	113.155	-1.1987	1.49958e-174	9.83835e-174
CAT	13473	15512	6179	6959	310.57	305.11	130.03	137.84	307.84	133.935	-1.2006	1.91299e-174	1.2543e-173
KDM2A	11095	12297	4029	4574	255.75	241.87	84.79	90.6	248.81	87.695	-1.5045	3.01489e-174	1.9756e-173
DUS1L	4389	5253	1181	1325	101.17	103.32	24.85	26.24	102.245	25.545	-2.0009	3.03454e-174	1.98727e-173
ORC2	2706	3202	383	353	62.38	62.98	8.06	6.99	62.68	7.525	-3.0582	3.98364e-174	2.60726e-173
CTCF	10422	11594	4333	4568	240.24	228.05	91.19	90.48	234.145	90.835	-1.3661	4.04628e-174	2.64665e-173
PRKCB	10317	11494	4285	4468	237.82	226.08	90.18	88.5	231.95	89.34	-1.3764	9.5935e-174	6.2713e-173
CAB39L	2039	2494	7726	8265	47	49.06	162.59	163.71	48.03	163.15	1.7642	1.39146e-173	9.09056e-173
ADAMTS3	456	541	3910	3850	10.51	10.64	82.28	76.26	10.575	79.27	2.9061	1.65379e-173	1.07979e-172
CAPZB	16737	18670	7719	8561	385.81	367.23	162.44	169.57	376.52	166.005	-1.1815	2.39576e-173	1.56329e-172
GPC2	1223	1322	5945	6478	28.19	26	125.11	128.31	27.095	126.71	2.2254	2.5762e-173	1.68002e-172
ATP6AP2	5190	6539	15961	17391	119.64	128.62	335.89	344.47	124.13	340.18	1.4544	2.78063e-173	1.81225e-172
NDC80	1688	1962	75	69	38.91	38.59	1.58	1.37	38.75	1.475	-4.7154	3.35682e-173	2.18646e-172
BRCA2	2618	2906	358	372	60.35	57.16	7.53	7.37	58.755	7.45	-2.9794	3.40169e-173	2.21436e-172
MAPKAPK3	6043	6864	1750	1690	139.3	135.01	36.83	33.47	137.155	35.15	-1.9642	4.14161e-173	2.69441e-172
ELOVL2	21	25	2607	2768	0.48	0.49	54.86	54.83	0.485	54.845	6.8212	6.1152e-173	3.97598e-172
CTBS	572	656	3896	4047	13.19	12.9	81.99	80.16	13.045	81.075	2.6358	2.02498e-172	1.31581e-171
DEPDC1B	2514	2982	16	18	57.95	58.65	0.34	0.36	58.3	0.35	-7.38	2.71055e-172	1.76023e-171
AHCY	6776	8232	2379	2691	156.19	161.92	50.06	53.3	159.055	51.68	-1.6218	4.93206e-172	3.20098e-171
AMZ2	2471	2647	26	15	56.96	52.06	0.55	0.3	54.51	0.425	-7.0029	5.04677e-172	3.27347e-171
GPR137C	157	179	2363	2540	3.62	3.52	49.73	50.31	3.57	50.02	3.8085	8.19932e-172	5.31512e-171
LITAF	6835	8021	2730	2953	157.55	157.77	57.45	58.49	157.66	57.97	-1.4434	3.87633e-171	2.51129e-170
PAIP2B	2067	2350	7589	8268	47.65	46.22	159.71	163.77	46.935	161.74	1.7849	4.28098e-171	2.77179e-170
MARCKSL1	2918	3183	10224	10875	67.26	62.61	215.16	215.4	64.935	215.28	1.7291	4.66371e-171	3.01779e-170
KCTD2	2022	2121	8718	9395	46.61	41.72	183.47	186.09	44.165	184.78	2.0648	6.72703e-171	4.35034e-170
DECR2	849	941	4745	4964	19.57	18.51	99.86	98.32	19.04	99.09	2.3797	7.30426e-171	4.72081e-170
TNFRSF1A	6972	8385	1662	2058	160.71	164.93	34.98	40.76	162.82	37.87	-2.1042	8.45728e-171	5.46277e-170
INTS1	12485	13767	5256	5402	287.79	270.79	110.61	107	279.29	108.805	-1.36	9.19983e-171	5.93887e-170
CHMP4C	126	155	2249	2522	2.9	3.05	47.33	49.95	2.975	48.64	4.0312	1.10301e-170	7.11613e-170
LRTM2	539	703	4779	4625	12.42	13.83	100.57	91.61	13.125	96.09	2.8721	1.18058e-170	7.61207e-170
FAM219A	2200	2657	7930	8657	50.71	52.26	166.88	171.47	51.485	169.175	1.7163	1.6462e-170	1.0608e-169
CLDN8	1080	1167	5543	6165	24.9	22.95	116.65	122.11	23.925	119.38	2.319	1.79908e-170	1.15863e-169
CHP1	8546	9963	3513	3929	196.99	195.97	73.93	77.82	196.48	75.875	-1.3727	2.41504e-170	1.55439e-169
CDC34	4095	4960	1119	1136	94.39	97.56	23.55	22.5	95.975	23.025	-2.0595	3.49127e-170	2.24575e-169
PPP2R5A	8858	10514	4187	4469	204.19	206.8	88.11	88.52	205.495	88.315	-1.2184	5.97077e-170	3.83841e-169
MACIR	3490	3850	684	705	80.45	75.73	14.39	13.96	78.09	14.175	-2.4618	1.14277e-169	7.34211e-169
ITGA3	1598	1857	6475	6813	36.84	36.53	136.26	134.95	36.685	135.605	1.8861	1.2504e-169	8.02889e-169
DDR2	6623	7722	2509	2548	152.67	151.89	52.8	50.47	152.28	51.635	-1.5603	1.30974e-169	8.40491e-169
FAT3	4107	4935	1024	1168	94.67	97.07	21.55	23.13	95.87	22.34	-2.1015	1.72198e-169	1.10439e-168
NDUFB4	1208	1509	5918	6169	27.85	29.68	124.54	122.19	28.765	123.365	2.1005	2.65894e-169	1.7043e-168
PBK	2006	2458	153	194	46.24	48.35	3.22	3.84	47.295	3.53	-3.7439	4.36811e-169	2.79817e-168
ECHS1	2518	2804	9842	9877	58.04	55.15	207.12	195.64	56.595	201.38	1.8312	4.79472e-169	3.06964e-168
TMEM63A	5498	6842	1852	1974	126.74	134.58	38.97	39.1	130.66	39.035	-1.743	4.9853e-169	3.18977e-168
ETS1	10499	12408	5299	5730	242.01	244.06	111.52	113.5	243.035	112.51	-1.1111	7.36527e-169	4.70978e-168
PCYT1A	9133	11375	3960	4300	210.53	223.74	83.34	85.17	217.135	84.255	-1.3658	1.77134e-168	1.13203e-167
ZFYVE19	1455	1642	6700	6759	33.54	32.3	141	133.88	32.92	137.44	2.0618	3.13854e-168	2.0046e-167
MMD	1942	2062	8176	8709	44.77	40.56	172.06	172.5	42.665	172.28	2.0136	4.84181e-168	3.09067e-167
DAG1	9904	11724	22049	23575	228.3	230.6	464.01	466.96	229.45	465.485	1.0206	5.23264e-168	3.33819e-167
PHOSPHO1	3935	5585	604	587	90.71	109.85	12.71	11.63	100.28	12.17	-3.0426	6.38873e-168	4.07333e-167
TMEM121	92	86	2263	2305	2.12	1.69	47.62	45.66	1.905	46.64	4.6137	9.02256e-168	5.74924e-167
ABCG2	3495	4301	843	885	80.56	84.6	17.74	17.53	82.58	17.635	-2.2274	1.26074e-167	8.02878e-167
LIMCH1	4734	5453	14038	14307	109.12	107.26	295.42	283.38	108.19	289.4	1.4195	3.5724e-167	2.27369e-166
MAD2L1	3122	3603	455	560	71.97	70.87	9.58	11.09	71.42	10.335	-2.7888	5.5208e-167	3.51171e-166
RGS9BP	100	136	2183	2390	2.31	2.68	45.94	47.34	2.495	46.64	4.2245	5.73019e-167	3.64276e-166
GALNT13	32	40	2114	2196	0.74	0.79	44.49	43.5	0.765	43.995	5.8457	9.88229e-167	6.27864e-166
SLC7A4	402	432	3413	3504	9.27	8.5	71.83	69.4	8.885	70.615	2.9905	1.08567e-166	6.89367e-166
NRCAM	719	832	4831	5853	16.57	16.36	101.67	115.93	16.465	108.8	2.7242	1.38957e-166	8.81818e-166
NXF1	11746	13476	5930	6180	270.76	265.06	124.79	122.41	267.91	123.6	-1.1161	1.7204e-166	1.09113e-165
PANK3	2351	2865	8553	9576	54.19	56.35	179.99	189.67	55.27	184.83	1.7416	1.85333e-166	1.17475e-165
DPY19L4	1268	1647	6606	7457	29.23	32.4	139.02	147.7	30.815	143.36	2.2179	3.20499e-166	2.03033e-165
SLC7A3	42	41	2070	2159	0.97	0.81	43.56	42.76	0.89	43.16	5.5997	3.20693e-166	2.03037e-165
MFGE8	3179	3650	10766	10910	73.28	71.79	226.57	216.1	72.535	221.335	1.6095	3.25537e-166	2.05984e-165
AQP3	40	56	2024	2130	0.92	1.1	42.59	42.19	1.01	42.39	5.3913	4.13732e-166	2.61637e-165
SESN3	1182	1168	6950	7533	27.25	22.97	146.26	149.21	25.11	147.735	2.5567	4.50535e-166	2.84744e-165
NR1D1	2889	3325	486	462	66.59	65.4	10.23	9.15	65.995	9.69	-2.7678	6.80856e-166	4.3006e-165
PPP1R36	26	37	2141	2455	0.6	0.73	45.06	48.63	0.665	46.845	6.1384	7.47065e-166	4.71606e-165
TBX18	2359	2875	8249	8856	54.38	56.55	173.6	175.41	55.465	174.505	1.6536	8.56167e-166	5.40167e-165
SLC13A3	1210	1417	5513	5767	27.89	27.87	116.02	114.23	27.88	115.125	2.0459	8.75932e-166	5.52315e-165
IMPACT	2366	3066	314	342	54.54	60.31	6.61	6.77	57.425	6.69	-3.1016	9.15266e-166	5.76782e-165
TMEM115	1907	2148	8130	8113	43.96	42.25	171.09	160.7	43.105	165.895	1.9443	9.16409e-166	5.77168e-165
COL3A1	15682	18045	8901	9545	361.49	354.93	187.32	189.06	358.21	188.19	-0.9286	1.84485e-165	1.16124e-164
RAP1B	12855	15674	5794	6601	296.32	308.3	121.93	130.75	302.31	126.34	-1.2587	2.10154e-165	1.32205e-164
EIF4G3	14194	16390	7937	8389	327.19	322.38	167.03	166.16	324.785	166.595	-0.9631	2.62103e-165	1.6479e-164
ANKRD40	4244	5168	1204	1328	97.83	101.65	25.34	26.3	99.74	25.82	-1.9497	6.42062e-165	4.03444e-164
PUM2	13235	15591	7125	7817	305.08	306.67	149.94	154.83	305.875	152.385	-1.0052	7.48109e-165	4.69807e-164
NOL6	4746	5492	1459	1483	109.4	108.02	30.7	29.37	108.71	30.035	-1.8558	8.36032e-165	5.24719e-164
FGFR2	10104	11784	4891	5347	232.91	231.78	102.93	105.91	232.345	104.42	-1.1539	1.35459e-164	8.49689e-164
ABHD4	4689	5523	1406	1570	108.09	108.63	29.59	31.1	108.36	30.345	-1.8363	1.96493e-164	1.23182e-163
APBB1IP	4511	5447	1393	1423	103.98	107.14	29.32	28.19	105.56	28.755	-1.8762	3.90544e-164	2.44693e-163
SARNP	934	933	6385	6318	21.53	18.35	134.37	125.14	19.94	129.755	2.7021	4.18828e-164	2.62262e-163
GRIN3B	189	246	2573	2682	4.36	4.84	54.15	53.12	4.6	53.635	3.5435	5.00486e-164	3.13215e-163
GPM6A	1837	2162	30	21	42.34	42.53	0.63	0.42	42.435	0.525	-6.3368	5.33827e-164	3.33888e-163
HSD17B11	4402	4738	882	845	101.47	93.19	18.56	16.74	97.33	17.65	-2.4632	9.4226e-164	5.89007e-163
GPBP1	4133	5127	1171	1240	95.27	100.84	24.64	24.56	98.055	24.6	-1.9949	1.1451e-163	7.15391e-163
SGTB	135	173	2291	2657	3.11	3.4	48.21	52.63	3.255	50.42	3.9533	1.97676e-163	1.23425e-162
ARL10	2143	2390	199	237	49.4	47.01	4.19	4.69	48.205	4.44	-3.4406	3.14756e-163	1.96415e-162
PLEKHG5	2610	3047	8788	9108	60.16	59.93	184.94	180.4	60.045	182.67	1.6051	3.68609e-163	2.29888e-162
UACA	4250	5035	13002	13195	97.97	99.04	273.62	261.36	98.505	267.49	1.4412	4.89009e-163	3.04803e-162
PRSS57	1746	2037	42	27	40.25	40.07	0.88	0.53	40.16	0.705	-5.832	6.41112e-163	3.9938e-162
SIDT2	13777	15868	6422	6332	317.58	312.11	135.15	125.42	314.845	130.285	-1.273	7.248e-163	4.51255e-162
CRTC1	3133	3765	9725	10613	72.22	74.06	204.66	210.21	73.14	207.435	1.5039	8.06634e-163	5.01916e-162
TARDBP	13877	15725	7234	7606	319.88	309.3	152.24	150.65	314.59	151.445	-1.0547	3.92272e-162	2.43946e-161
BSND	243	203	3758	3794	5.6	3.99	79.09	75.15	4.795	77.12	4.0075	5.00743e-162	3.11223e-161
RAB11FIP2	844	880	5262	6177	19.46	17.31	110.74	122.35	18.385	116.545	2.6643	5.83839e-162	3.62661e-161
COLGALT1	11446	13338	5972	6180	263.84	262.35	125.68	122.41	263.095	124.045	-1.0847	5.96847e-162	3.7053e-161
CRY1	1198	1289	6020	6153	27.62	25.35	126.69	121.87	26.485	124.28	2.2303	6.0024e-162	3.72423e-161
ARPC5	16847	19686	8913	8894	388.34	387.21	187.57	176.17	387.775	181.87	-1.0923	6.74099e-162	4.18011e-161
AGO3	1968	2463	7643	8265	45.36	48.45	160.84	163.71	46.905	162.275	1.7906	8.74723e-162	5.42109e-161
TMEM200C	76	125	2544	2501	1.75	2.46	53.54	49.54	2.105	51.54	4.6138	2.35683e-161	1.45981e-160
TMEM51	555	606	4282	4169	12.79	11.92	90.11	82.58	12.355	86.345	2.805	2.53576e-161	1.56974e-160
OCIAD2	259	299	2644	2956	5.97	5.88	55.64	58.55	5.925	57.095	3.2685	4.22909e-161	2.61649e-160
THBD	4661	5289	1339	1479	107.44	104.03	28.18	29.29	105.735	28.735	-1.8796	4.64347e-161	2.87123e-160
TMBIM1	4430	5204	13899	13928	102.12	102.36	292.5	275.87	102.24	284.185	1.4749	5.04619e-161	3.11847e-160
DOT1L	12967	15496	7299	7606	298.9	304.8	153.6	150.65	301.85	152.125	-0.9886	6.17857e-161	3.81609e-160
BECN1	8364	9774	3849	4163	192.8	192.25	81	82.46	192.525	81.73	-1.2361	6.2514e-161	3.85888e-160
DIDO1	10418	11639	4551	4926	240.15	228.93	95.77	97.57	234.54	96.67	-1.2787	7.83887e-161	4.83605e-160
IL7R	1994	2342	152	197	45.96	46.07	3.2	3.9	46.015	3.55	-3.6962	9.18519e-161	5.66342e-160
TMPRSS5	88	126	2181	2260	2.03	2.48	45.9	44.76	2.255	45.33	4.3293	1.03357e-160	6.36918e-160
AGT	1545	1904	38	37	35.61	37.45	0.8	0.73	36.53	0.765	-5.5775	1.05047e-160	6.46968e-160
SKI	6926	8193	2895	3151	159.65	161.15	60.92	62.41	160.4	61.665	-1.3792	1.18241e-160	7.27812e-160
CDH19	90	97	2151	2133	2.07	1.91	45.27	42.25	1.99	43.76	4.4588	1.20897e-160	7.4374e-160
DGCR2	4584	5347	13423	13681	105.67	105.17	282.48	270.98	105.42	276.73	1.3923	1.35605e-160	8.33747e-160
NAV2	1808	2273	7388	7765	41.68	44.71	155.48	153.8	43.195	154.64	1.84	1.7162e-160	1.05458e-159
GNAL	603	864	5219	5879	13.9	16.99	109.83	116.45	15.445	113.14	2.8729	1.73922e-160	1.06813e-159
GEMIN7	1910	1938	80	85	44.03	38.12	1.68	1.68	41.075	1.68	-4.6117	3.21402e-160	1.97274e-159
DEAF1	3020	3534	628	693	69.61	69.51	13.22	13.73	69.56	13.475	-2.368	3.34611e-160	2.05266e-159
LYRM1	143	158	2184	2372	3.3	3.11	45.96	46.98	3.205	46.47	3.8579	4.47908e-160	2.74612e-159
SPOP	8336	9556	3509	3545	192.15	187.96	73.85	70.22	190.055	72.035	-1.3996	7.75095e-160	4.74943e-159
HINT1	5023	6315	729	579	115.79	124.21	15.34	11.47	120	13.405	-3.1622	1.57696e-159	9.65743e-159
OGFR	6211	7544	2484	2618	143.17	148.39	52.27	51.86	145.78	52.065	-1.4854	1.78457e-159	1.09227e-158
RFK	3170	3703	724	772	73.07	72.84	15.24	15.29	72.955	15.265	-2.2568	1.84977e-159	1.13154e-158
IVNS1ABP	13372	16305	6569	6529	308.24	320.71	138.24	129.32	314.475	133.78	-1.2331	3.06373e-159	1.87309e-158
LMAN2	14301	16374	7377	7480	329.65	322.07	155.25	148.16	325.86	151.705	-1.103	3.10984e-159	1.9002e-158
AP3M2	1218	1431	5326	5791	28.08	28.15	112.08	114.7	28.115	113.39	2.0119	4.97547e-159	3.03845e-158
RHNO1	3485	3837	9	14	80.33	75.47	0.19	0.28	77.9	0.235	-8.3728	6.11101e-159	3.72981e-158
GPR158	132	160	2537	2402	3.04	3.15	53.39	47.58	3.095	50.485	4.0278	7.48886e-159	4.5682e-158
PGD	12149	14362	6649	6880	280.05	282.49	139.93	136.27	281.27	138.1	-1.0262	9.74238e-159	5.93952e-158
GDF10	3543	4064	266	396	81.67	79.94	5.6	7.84	80.805	6.72	-3.5879	1.01493e-158	6.18414e-158
KLF9	3561	4320	792	920	82.09	84.97	16.67	18.22	83.53	17.445	-2.2595	1.42025e-158	8.64892e-158
BLM	3017	3426	517	481	69.55	67.39	10.88	9.53	68.47	10.205	-2.7462	2.02467e-158	1.23228e-157
KIF24	2014	2356	245	253	46.42	46.34	5.16	5.01	46.38	5.085	-3.1892	4.15164e-158	2.5254e-157
NCOA4	13830	15445	6818	7158	318.8	303.79	143.48	141.78	311.295	142.63	-1.126	4.32698e-158	2.63059e-157
ZC3H12B	217	194	2936	3180	5	3.82	61.79	62.99	4.41	62.39	3.8225	4.65484e-158	2.82833e-157
MIGA2	2528	2975	8381	9292	58.27	58.52	176.37	184.05	58.395	180.21	1.6258	4.85829e-158	2.9503e-157
PPFIBP1	3086	3978	11281	11955	71.14	78.24	237.4	236.8	74.69	237.1	1.6665	5.49876e-158	3.33737e-157
ARF3	11287	13634	5533	5556	260.18	268.17	116.44	110.05	264.175	113.245	-1.222	5.8138e-158	3.52661e-157
DENND5B	1000	1050	5280	5659	23.05	20.65	111.12	112.09	21.85	111.605	2.3527	7.90272e-158	4.79105e-157
MKLN1	4727	5579	1585	1699	108.96	109.74	33.36	33.65	109.35	33.505	-1.7065	8.58379e-158	5.20105e-157
STK16	7458	8057	2245	2204	171.92	158.48	47.24	43.66	165.2	45.45	-1.8619	1.15325e-157	6.98382e-157
AGO1	6631	7739	2718	2944	152.85	152.22	57.2	58.31	152.535	57.755	-1.4011	1.49254e-157	9.03344e-157
SFRP4	2386	2441	158	199	55	48.01	3.33	3.94	51.505	3.635	-3.8247	1.98009e-157	1.19776e-156
RCAN1	1797	2158	6701	7233	41.42	42.45	141.02	143.27	41.935	142.145	1.7611	2.05421e-157	1.2419e-156
BLCAP	1702	1937	6641	6916	39.23	38.1	139.76	136.99	38.665	138.375	1.8395	2.31283e-157	1.39748e-156
TMEM35A	172	176	2506	2507	3.96	3.46	52.74	49.66	3.71	51.2	3.7867	2.78039e-157	1.67906e-156
DBNL	11391	13216	5784	5900	262.58	259.95	121.72	116.86	261.265	119.29	-1.131	7.38949e-157	4.45998e-156
PREPL	3335	3832	637	753	76.88	75.37	13.41	14.91	76.125	14.16	-2.4265	7.78986e-157	4.69902e-156
KMT2A	14120	16308	7862	8129	325.48	320.77	165.45	161.01	323.125	163.23	-0.9852	1.25394e-156	7.55983e-156
XPA	449	513	3238	3448	10.35	10.09	68.14	68.3	10.22	68.22	2.7388	1.44988e-156	8.73626e-156
SEC61G	3565	4256	796	928	82.18	83.71	16.75	18.38	82.945	17.565	-2.2395	1.69201e-156	1.01896e-155
TBC1D9	2221	2571	7529	8138	51.2	50.57	158.44	161.19	50.885	159.815	1.6511	2.86853e-156	1.72652e-155
PSIP1	4988	5715	1671	1757	114.98	112.41	35.17	34.8	113.695	34.985	-1.7004	3.22647e-156	1.94089e-155
DACH2	49	64	1867	2179	1.13	1.26	39.29	43.16	1.195	41.225	5.1084	3.26334e-156	1.96198e-155
CDC7	1610	2056	104	120	37.11	40.44	2.19	2.38	38.775	2.285	-4.0849	3.45841e-156	2.07811e-155
TMEM14A	157	192	2392	2385	3.62	3.78	50.34	47.24	3.7	48.79	3.721	4.93066e-156	2.96112e-155
SGCB	1499	1826	6109	6490	34.55	35.92	128.56	128.55	35.235	128.555	1.8673	5.44443e-156	3.26786e-155
HERC3	1463	1681	5868	6284	33.72	33.06	123.49	124.47	33.39	123.98	1.8926	6.77669e-156	4.06526e-155
NSMCE4A	4143	4698	1030	1176	95.5	92.41	21.68	23.29	93.955	22.485	-2.063	8.15812e-156	4.89127e-155
SORD	6872	7647	2514	2693	158.41	150.41	52.91	53.34	154.41	53.125	-1.5393	1.0543e-155	6.31764e-155
CBFA2T3	5050	5997	1808	1932	116.41	117.96	38.05	38.27	117.185	38.16	-1.6187	1.33084e-155	7.97035e-155
ACOX2	78	94	1995	2014	1.8	1.85	41.98	39.89	1.825	40.935	4.4874	1.50037e-155	8.98072e-155
METAP1D	2221	2601	282	258	51.2	51.16	5.93	5.11	51.18	5.52	-3.2128	1.5497e-155	9.27086e-155
RRAD	319	358	2835	2976	7.35	7.04	59.66	58.95	7.195	59.305	3.0431	1.56595e-155	9.36296e-155
UBA2	7748	9174	3476	3801	178.6	180.45	73.15	75.29	179.525	74.22	-1.2743	1.84877e-155	1.10478e-154
KLHDC1	292	372	2970	3009	6.73	7.32	62.5	59.6	7.025	61.05	3.1194	2.15137e-155	1.28491e-154
USE1	4586	5182	1375	1417	105.71	101.93	28.94	28.07	103.82	28.505	-1.8648	2.38215e-155	1.42196e-154
HSPA14	4224	5118	1054	1238	97.37	100.67	22.18	24.52	99.02	23.35	-2.0843	4.42948e-155	2.6426e-154
COTL1	18341	22790	10644	11152	422.78	448.26	224	220.89	435.52	222.445	-0.9693	4.67338e-155	2.78658e-154
LIPC	1491	1813	34	37	34.37	35.66	0.72	0.73	35.015	0.725	-5.5938	5.9037e-155	3.51824e-154
ORC1	2080	2084	121	119	47.95	40.99	2.55	2.36	44.47	2.455	-4.179	7.64448e-155	4.55314e-154
CECR2	5005	5841	1697	1863	115.37	114.89	35.71	36.9	115.13	36.305	-1.665	8.72031e-155	5.19107e-154
PPP2R3A	636	886	4863	5446	14.66	17.43	102.34	107.87	16.045	105.105	2.7116	1.84972e-154	1.1005e-153
KCNA1	3930	4825	1139	1172	90.59	94.9	23.97	23.21	92.745	23.59	-1.9751	2.27232e-154	1.3512e-153
YAP1	3124	3849	9905	10498	72.01	75.71	208.45	207.94	73.86	208.195	1.4951	2.91046e-154	1.72971e-153
ARL2	1498	1802	78	90	34.53	35.44	1.64	1.78	34.985	1.71	-4.3547	3.15975e-154	1.87683e-153
FBXL14	4580	5445	1540	1606	105.57	107.1	32.41	31.81	106.335	32.11	-1.7275	4.05691e-154	2.40842e-153
SLC25A47	172	227	2366	2664	3.96	4.46	49.79	52.77	4.21	51.28	3.6065	4.38198e-154	2.59997e-153
TOP3B	5569	6497	2106	2255	128.37	127.79	44.32	44.67	128.08	44.495	-1.5253	4.68154e-154	2.77619e-153
TRABD	4992	5772	1677	1835	115.07	113.53	35.29	36.35	114.3	35.82	-1.674	5.65094e-154	3.34923e-153
RNF103	1455	1845	6364	6953	33.54	36.29	133.93	137.72	34.915	135.825	1.9598	5.80434e-154	3.43827e-153
DHX30	6040	7269	15247	16066	139.23	142.98	320.87	318.22	141.105	319.545	1.1793	6.44453e-154	3.81541e-153
BTG1	9323	11020	20533	21882	214.91	216.76	432.11	433.42	215.835	432.765	1.0037	9.99592e-154	5.91475e-153
GTF3C2	7354	8420	2510	2396	169.52	165.62	52.82	47.46	167.57	50.14	-1.7407	1.14926e-153	6.79665e-153
CFAP410	816	890	4441	4662	18.81	17.51	93.46	92.34	18.16	92.9	2.3549	1.19671e-153	7.0734e-153
COL11A1	47377	54073	33359	35120	1092.09	1063.58	702.02	695.63	1077.84	698.825	-0.6251	1.72938e-153	1.02163e-152
SRL	1726	2014	131	158	39.79	39.61	2.76	3.13	39.7	2.945	-3.7528	1.77085e-153	1.04556e-152
AKAP8L	8949	9838	3037	3482	206.28	193.51	63.91	68.97	199.895	66.44	-1.5891	1.77794e-153	1.04918e-152
GLCE	1233	1524	5502	6028	28.42	29.98	115.79	119.4	29.2	117.595	2.0098	2.03346e-153	1.19931e-152
IQGAP3	3756	3932	13133	14121	86.58	77.34	276.38	279.7	81.96	278.04	1.7623	2.10197e-153	1.23904e-152
FN3K	3710	4215	837	797	85.52	82.91	17.61	15.79	84.215	16.7	-2.3342	2.15953e-153	1.27228e-152
ATP6V0A4	164	271	16108	17105	3.78	5.33	338.99	338.8	4.555	338.895	6.2172	2.38221e-153	1.40271e-152
CTNND2	667	735	3914	4335	15.38	14.46	82.37	85.86	14.92	84.115	2.4951	3.00854e-153	1.77056e-152
PRDX1	7095	8381	17046	17833	163.55	164.85	358.73	353.22	164.2	355.975	1.1163	3.9096e-153	2.29959e-152
ARHGEF28	1111	1339	5407	6258	25.61	26.34	113.79	123.95	25.975	118.87	2.1942	5.5901e-153	3.28627e-152
MSRB3	1473	1892	6576	7049	33.95	37.21	138.39	139.62	35.58	139.005	1.966	7.90078e-153	4.64213e-152
MAPT	786	877	4269	4465	18.12	17.25	89.84	88.44	17.685	89.14	2.3335	1.14326e-152	6.71362e-152
DDX47	4476	5124	1289	1269	103.18	100.79	27.13	25.14	101.985	26.135	-1.9643	1.18674e-152	6.96519e-152
CCNY	4107	4853	1265	1363	94.67	95.46	26.62	27	95.065	26.81	-1.8261	3.05523e-152	1.7922e-151
RRP7A	3909	4559	1054	1035	90.11	89.67	22.18	20.5	89.89	21.34	-2.0746	3.63902e-152	2.1335e-151
NUCKS1	6487	7835	2762	2932	149.53	154.11	58.13	58.07	151.82	58.1	-1.3858	5.03629e-152	2.95111e-151
KIF9	237	285	2530	2629	5.46	5.61	53.24	52.07	5.535	52.655	3.2499	9.89825e-152	5.79694e-151
POLA2	4654	5361	1430	1419	107.28	105.45	30.09	28.11	106.365	29.1	-1.8699	1.26666e-151	7.41422e-151
GPR162	803	1014	4922	4897	18.51	19.94	103.58	97	19.225	100.29	2.3831	1.30763e-151	7.64993e-151
CLINT1	13290	16199	7384	8032	306.35	318.62	155.39	159.09	312.485	157.24	-0.9908	1.48883e-151	8.70528e-151
CRELD1	1592	1854	6431	6575	36.7	36.47	135.34	130.23	36.585	132.785	1.8598	1.50531e-151	8.7969e-151
RAB5C	15810	18343	8855	9795	364.44	360.8	186.35	194.01	362.62	190.18	-0.9311	2.25656e-151	1.318e-150
CLDN19	986	1214	5271	5277	22.73	23.88	110.93	104.52	23.305	107.725	2.2086	2.58584e-151	1.50952e-150
COL6A2	9331	10347	3932	4076	215.09	203.52	82.75	80.73	209.305	81.74	-1.3565	2.8426e-151	1.65851e-150
CKAP2	1843	2033	132	112	42.48	39.99	2.78	2.22	41.235	2.5	-4.0439	2.94119e-151	1.71512e-150
FAM234A	5020	5859	13973	14259	115.72	115.24	294.06	282.43	115.48	288.245	1.3197	4.94589e-151	2.88258e-150
NHSL2	5320	5967	1221	1096	122.63	117.37	25.7	21.71	120	23.705	-2.3398	5.31109e-151	3.09376e-150
HPSE	2717	3082	432	397	62.63	60.62	9.09	7.86	61.625	8.475	-2.8622	6.52798e-151	3.80058e-150
ARHGEF3	4119	4719	1223	1305	94.95	92.82	25.74	25.85	93.885	25.795	-1.8638	7.91634e-151	4.60641e-150
GCNT2	1519	1783	29	30	35.01	35.07	0.61	0.59	35.04	0.6	-5.8679	1.20765e-150	7.02339e-150
ZDHHC15	415	538	3327	3486	9.57	10.58	70.02	69.05	10.075	69.535	2.787	1.3598e-150	7.904e-150
NOS1AP	756	761	4684	5059	17.43	14.97	98.57	100.2	16.2	99.385	2.617	5.24656e-150	3.048e-149
LRRK2	5260	5444	1093	1234	121.25	107.08	23	24.44	114.165	23.72	-2.2669	7.84985e-150	4.55795e-149
PROS1	2832	3516	9351	9864	65.28	69.16	196.79	195.38	67.22	196.085	1.5445	7.97107e-150	4.62586e-149
JAK2	5367	6467	1956	2162	123.72	127.2	41.16	42.82	125.46	41.99	-1.5791	8.24937e-150	4.78481e-149
HIPK1	20686	24846	13783	14713	476.84	488.71	290.06	291.42	482.775	290.74	-0.7316	9.69405e-150	5.61976e-149
TCF7	2133	2241	180	211	49.17	44.08	3.79	4.18	46.625	3.985	-3.5485	1.05187e-149	6.09454e-149
BCHE	152	212	2325	2589	3.5	4.17	48.93	51.28	3.835	50.105	3.7077	1.0932e-149	6.33065e-149
NRXN3	210	239	2340	2634	4.84	4.7	49.24	52.17	4.77	50.705	3.4101	1.11324e-149	6.44327e-149
BORCS6	1475	1863	6871	6909	34	36.64	144.6	136.85	35.32	140.725	1.9943	1.79611e-149	1.039e-148
F2RL3	1464	1645	58	63	33.75	32.36	1.22	1.25	33.055	1.235	-4.7423	2.06453e-149	1.19364e-148
GCLC	10295	11079	2944	3517	237.31	217.92	61.96	69.66	227.615	65.81	-1.7902	2.13193e-149	1.23196e-148
CHERP	10177	11979	3778	4479	234.59	235.62	79.51	88.72	235.105	84.115	-1.4829	2.5768e-149	1.48824e-148
LONP1	7604	8737	3388	3530	175.28	171.85	71.3	69.92	173.565	70.61	-1.2975	2.66297e-149	1.53719e-148
ZMYND8	8737	10349	4300	4670	201.4	203.56	90.49	92.5	202.48	91.495	-1.146	2.91599e-149	1.68235e-148
USP12	3549	4069	858	970	81.81	80.03	18.06	19.21	80.92	18.635	-2.1185	4.46892e-149	2.57693e-148
STAU2	743	660	6397	6587	17.13	12.98	134.62	130.47	15.055	132.545	3.1382	4.64942e-149	2.67958e-148
MNS1	3180	3326	496	490	73.3	65.42	10.44	9.71	69.36	10.075	-2.7833	6.01128e-149	3.46262e-148
ARL2BP	4637	5730	1072	1309	106.89	112.71	22.56	25.93	109.8	24.245	-2.1791	6.34131e-149	3.65079e-148
WDR18	3531	4374	828	957	81.39	86.03	17.42	18.96	83.71	18.19	-2.2023	7.15226e-149	4.11548e-148
TNFSF10	481	688	4294	4839	11.09	13.53	90.37	95.85	12.31	93.11	2.9191	7.54623e-149	4.33988e-148
CFAP70	117	136	1957	2150	2.7	2.68	41.18	42.59	2.69	41.885	3.9608	7.68005e-149	4.4145e-148
BNIP3L	14253	16397	7637	8451	328.55	322.52	160.72	167.39	325.535	164.055	-0.9886	9.33737e-149	5.36429e-148
CCR2	3576	4396	640	801	82.43	86.47	13.47	15.87	84.45	14.67	-2.5252	1.02684e-148	5.89603e-148
ARPC5L	3790	4629	921	864	87.36	91.05	19.38	17.11	89.205	18.245	-2.2896	2.19032e-148	1.257e-147
FKBP3	1209	1509	5437	5972	27.87	29.68	114.42	118.29	28.775	116.355	2.0156	2.74908e-148	1.57684e-147
CCM2	6024	6903	2352	2530	138.86	135.78	49.5	50.11	137.32	49.805	-1.4632	3.9911e-148	2.28804e-147
ERBB4	70	130	26441	29185	1.61	2.56	556.44	578.07	2.085	567.255	8.0878	4.13231e-148	2.36774e-147
ADD1	28944	33976	19714	21593	667.19	668.29	414.87	427.7	667.74	421.285	-0.6645	4.82909e-148	2.76552e-147
SYNJ2	2233	2492	7727	8136	51.47	49.02	162.61	161.15	50.245	161.88	1.6879	5.42068e-148	3.10268e-147
MMS22L	2526	2856	448	461	58.23	56.18	9.43	9.13	57.205	9.28	-2.6239	7.71344e-148	4.41267e-147
KIF20B	1980	2336	214	260	45.64	45.95	4.5	5.15	45.795	4.825	-3.2466	1.07971e-147	6.1735e-147
WDR81	9001	11048	4113	4575	207.48	217.31	86.56	90.62	212.395	88.59	-1.2615	1.14178e-147	6.52495e-147
NFX1	5887	6783	2252	2464	135.7	133.42	47.39	48.8	134.56	48.095	-1.4843	1.88878e-147	1.07882e-146
MARVELD3	192	245	2314	2495	4.43	4.82	48.7	49.42	4.625	49.06	3.407	6.27486e-147	3.58215e-146
VIM	31103	36532	22013	22799	716.96	718.56	463.25	451.58	717.76	457.415	-0.65	9.6673e-147	5.5159e-146
YWHAB	11548	13570	23942	25728	266.19	266.91	503.85	509.6	266.55	506.725	0.9268	1.74653e-146	9.96e-146
MYC	4073	4753	980	1166	93.89	93.49	20.62	23.1	93.69	21.86	-2.0996	6.6594e-146	3.79568e-145
MELK	1425	1724	31	31	32.85	33.91	0.65	0.61	33.38	0.63	-5.7275	6.96652e-146	3.96865e-145
FOXP1	6634	7890	2937	3151	152.92	155.19	61.81	62.41	154.055	62.11	-1.3105	1.20272e-145	6.84802e-145
RNF214	6222	7387	2645	2850	143.42	145.3	55.66	56.45	144.36	56.055	-1.3648	1.27652e-145	7.2644e-145
SOWAHA	3401	4042	939	984	78.4	79.5	19.76	19.49	78.95	19.625	-2.0082	1.4562e-145	8.28257e-145
POLL	979	1286	5237	5693	22.57	25.29	110.21	112.76	23.93	111.485	2.22	1.65971e-145	9.43515e-145
MCPH1	1835	2038	151	130	42.3	40.09	3.18	2.57	41.195	2.875	-3.8408	2.03417e-145	1.15578e-144
CYTL1	971	1086	4565	4919	22.38	21.36	96.07	97.43	21.87	96.75	2.1453	3.59382e-145	2.04088e-144
DTX4	2340	2435	9316	9706	53.94	47.89	196.05	192.25	50.915	194.15	1.931	3.94756e-145	2.24059e-144
TAB2	9552	11655	4836	5248	220.18	229.25	101.77	103.95	224.715	102.86	-1.1274	4.91964e-145	2.79088e-144
AXIN1	5469	6225	1772	2017	126.07	122.44	37.29	39.95	124.255	38.62	-1.6859	5.14133e-145	2.91512e-144
MYORG	900	1064	4495	4632	20.75	20.93	94.6	91.75	20.84	93.175	2.1606	7.2947e-145	4.13392e-144
GNAZ	2253	2842	371	369	51.93	55.9	7.81	7.31	53.915	7.56	-2.8342	1.15288e-144	6.52997e-144
TAF8	4589	5205	1029	1255	105.78	102.38	21.65	24.86	104.08	23.255	-2.1621	1.22111e-144	6.91281e-144
TWF2	5059	5488	14828	15487	116.62	107.95	312.05	306.75	112.285	309.4	1.4623	1.32259e-144	7.48343e-144
FERMT1	64	109	2161	2203	1.48	2.14	45.48	43.64	1.81	44.56	4.6217	1.74512e-144	9.86904e-144
ERAP1	2583	3196	8540	9077	59.54	62.86	179.72	179.79	61.2	179.755	1.5544	1.7642e-144	9.97172e-144
CCNYL1	825	908	4488	4558	19.02	17.86	94.45	90.28	18.44	92.365	2.3245	1.85994e-144	1.05074e-143
QSOX2	1020	1180	4730	5334	23.51	23.21	99.54	105.65	23.36	102.595	2.1348	2.0784e-144	1.17354e-143
RAD51	2438	2843	239	324	56.2	55.92	5.03	6.42	56.06	5.725	-3.2916	2.6907e-144	1.51849e-143
EML1	1029	1229	4669	4991	23.72	24.17	98.26	98.86	23.945	98.56	2.0413	2.70525e-144	1.5259e-143
WBP1L	7655	8597	3073	3094	176.46	169.1	64.67	61.28	172.78	62.975	-1.4561	2.76587e-144	1.55928e-143
NPR1	1844	1870	96	114	42.51	36.78	2.02	2.26	39.645	2.14	-4.2115	3.18914e-144	1.79697e-143
GRIA1	61	41	2094	2215	1.41	0.81	44.07	43.87	1.11	43.97	5.3079	3.33257e-144	1.87681e-143
GPX3	18798	22233	39425	40433	433.32	437.31	829.68	800.87	435.315	815.275	0.9052	4.89727e-144	2.75659e-143
TMUB1	751	838	4456	4407	17.31	16.48	93.77	87.29	16.895	90.53	2.4218	5.25436e-144	2.95605e-143
GAPVD1	11874	13750	6635	6941	273.71	270.45	139.63	137.48	272.08	138.555	-0.9736	6.61291e-144	3.71843e-143
ANP32A	9502	10847	4025	4578	219.03	213.35	84.7	90.68	216.19	87.69	-1.3018	6.70086e-144	3.76594e-143
PRXL2A	5248	5997	1913	2047	120.97	117.96	40.26	40.55	119.465	40.405	-1.564	6.71231e-144	3.77042e-143
TUB	312	305	2919	3191	7.19	6	61.43	63.2	6.595	62.315	3.2401	6.99584e-144	3.92765e-143
LDLRAD1	97	119	1957	2398	2.24	2.34	41.18	47.5	2.29	44.34	4.2752	8.68555e-144	4.87379e-143
GATM	1909	2313	11	21	44	45.5	0.23	0.42	44.75	0.325	-7.1053	9.13501e-144	5.12335e-143
LOX	7562	9621	3135	3353	174.31	189.24	65.97	66.41	181.775	66.19	-1.4575	1.10147e-143	6.17437e-143
CDS2	17083	20350	10847	11250	393.78	400.27	228.27	222.83	397.025	225.55	-0.8158	1.70066e-143	9.52823e-143
KRT222	224	206	2717	2851	5.16	4.05	57.18	56.47	4.605	56.825	3.6253	2.18156e-143	1.22163e-142
MKKS	728	857	4082	4152	16.78	16.86	85.9	82.24	16.82	84.07	2.3214	3.15757e-143	1.76726e-142
KNOP1	2766	3559	556	612	63.76	70	11.7	12.12	66.88	11.91	-2.4894	5.86168e-143	3.27904e-142
NDFIP1	4760	5958	14105	14588	109.72	117.19	296.83	288.95	113.455	292.89	1.3682	5.89314e-143	3.29494e-142
MYBPC2	2207	2690	143	95	50.87	52.91	3.01	1.88	51.89	2.445	-4.4076	7.62213e-143	4.25945e-142
DHX32	2038	2158	15	18	46.98	42.45	0.32	0.36	44.715	0.34	-7.0391	9.49833e-143	5.30519e-142
TMTC4	1129	1463	5935	6948	26.02	28.78	124.9	137.62	27.4	131.26	2.2602	9.89949e-143	5.52641e-142
ADAMTS13	36	43	1713	2034	0.83	0.85	36.05	40.29	0.84	38.17	5.5059	1.21154e-142	6.75994e-142
GP1BB	1499	1711	105	110	34.55	33.65	2.21	2.18	34.1	2.195	-3.9575	1.8562e-142	1.03516e-141
CPSF2	5170	5898	1843	2004	119.17	116.01	38.79	39.69	117.59	39.24	-1.5834	4.14818e-142	2.31216e-141
ARHGEF2	9067	10850	4551	4642	209	213.41	95.77	91.95	211.205	93.86	-1.1701	4.36591e-142	2.43227e-141
SPATS2	494	475	4097	4109	11.39	9.34	86.22	81.39	10.365	83.805	3.0153	4.72145e-142	2.629e-141
ACE	2537	2722	360	343	58.48	53.54	7.58	6.79	56.01	7.185	-2.9626	5.75036e-142	3.20028e-141
ARL3	1518	2014	7060	7630	34.99	39.61	148.57	151.13	37.3	149.85	2.0063	5.80754e-142	3.23044e-141
KLHL15	356	342	3336	3391	8.21	6.73	70.2	67.17	7.47	68.685	3.2008	5.94983e-142	3.3079e-141
GALNT16	286	328	2536	2689	6.59	6.45	53.37	53.26	6.52	53.315	3.0316	8.55307e-142	4.75277e-141
EIF3F	12357	15568	5168	4918	284.84	306.21	108.76	97.41	295.525	103.085	-1.5194	1.16486e-141	6.46959e-141
AZIN1	11010	13685	4985	5670	253.79	269.18	104.91	112.31	261.485	108.61	-1.2676	1.54779e-141	8.59196e-141
TCEA1	3661	4451	1050	1164	84.39	87.55	22.1	23.06	85.97	22.58	-1.9288	1.6321e-141	9.05535e-141
DNAJC12	198	200	2300	2596	4.56	3.93	48.4	51.42	4.245	49.91	3.5555	2.08196e-141	1.15454e-140
GCHFR	171	212	2382	2323	3.94	4.17	50.13	46.01	4.055	48.07	3.5674	2.88731e-141	1.60033e-140
DQX1	518	630	3370	3501	11.94	12.39	70.92	69.35	12.165	70.135	2.5274	3.08728e-141	1.71029e-140
SFRP5	985	1284	5125	5426	22.71	25.26	107.85	107.47	23.985	107.66	2.1663	4.53972e-141	2.51363e-140
JAM3	2728	3312	8757	9803	62.88	65.14	184.29	194.17	64.01	189.23	1.5638	4.89337e-141	2.70806e-140
TMPRSS13	33	20	9084	9409	0.76	0.39	191.17	186.37	0.575	188.77	8.3589	6.47241e-141	3.5801e-140
CCNL2	14047	16277	8299	8625	323.8	320.16	174.65	170.84	321.98	172.745	-0.8983	7.81803e-141	4.32221e-140
GSTK1	458	651	3951	4216	10.56	12.8	83.15	83.51	11.68	83.33	2.8348	8.3333e-141	4.60473e-140
BEGAIN	78	120	1959	2244	1.8	2.36	41.23	44.45	2.08	42.84	4.3643	8.72985e-141	4.8214e-140
FBXL17	3585	4142	900	1034	82.64	81.47	18.94	20.48	82.055	19.71	-2.0577	1.11056e-140	6.13039e-140
GP9	3760	4540	7	10	86.67	89.3	0.15	0.2	87.985	0.175	-8.9738	1.43145e-140	7.89772e-140
ANKRD16	3429	3911	904	982	79.04	76.93	19.02	19.45	77.985	19.235	-2.0195	1.68124e-140	9.27116e-140
EXPH5	137	172	1990	2161	3.16	3.38	41.88	42.8	3.27	42.34	3.6947	2.3147e-140	1.27579e-139
SLC37A2	3420	3895	830	804	78.83	76.61	17.47	15.93	77.72	16.7	-2.2184	2.48356e-140	1.36816e-139
NFIA	1409	1798	6243	6455	32.48	35.37	131.38	127.86	33.925	129.62	1.9339	6.16075e-140	3.39216e-139
USP1	4968	5898	1882	2034	114.52	116.01	39.61	40.29	115.265	39.95	-1.5287	6.98844e-140	3.84595e-139
NEBL	2433	3323	12197	14651	56.08	65.36	256.68	290.2	60.72	273.44	2.171	8.19794e-140	4.50928e-139
AP1B1	15996	19220	7469	7094	368.73	378.05	157.18	140.51	373.39	148.845	-1.3269	8.63947e-140	4.74974e-139
SERINC1	11209	13571	24013	25782	258.38	266.93	505.34	510.67	262.655	508.005	0.9517	8.91427e-140	4.89834e-139
GCC2	797	997	4243	4771	18.37	19.61	89.29	94.5	18.99	91.895	2.2747	9.82572e-140	5.39644e-139
APAF1	4203	5124	1201	1142	96.88	100.79	25.27	22.62	98.835	23.945	-2.0453	1.01827e-139	5.58965e-139
STX1A	423	558	3266	3453	9.75	10.98	68.73	68.39	10.365	68.56	2.7256	1.32358e-139	7.26195e-139
FLI1	4503	5170	1536	1639	103.8	101.69	32.32	32.46	102.745	32.39	-1.6654	1.64349e-139	9.01262e-139
SRF	6457	7657	2856	2942	148.84	150.61	60.1	58.27	149.725	59.185	-1.339	1.76166e-139	9.65576e-139
TRPC4AP	10986	13024	6185	6680	253.24	256.17	130.16	132.31	254.705	131.235	-0.9567	1.79096e-139	9.81143e-139
CREG1	11532	14199	6277	6778	265.83	279.29	132.1	134.25	272.56	133.175	-1.0333	1.97392e-139	1.08083e-138
GSTO2	16	22	2086	2179	0.37	0.43	43.9	43.16	0.4	43.53	6.7659	1.99801e-139	1.09347e-138
DSCAM	143	127	2215	2491	3.3	2.5	46.61	49.34	2.9	47.975	4.0482	2.49478e-139	1.36465e-138
OLFML1	311	435	3279	3960	7.17	8.56	69.01	78.44	7.865	73.725	3.2286	2.7819e-139	1.52094e-138
SPTLC2	4297	5181	1286	1234	99.05	101.91	27.06	24.44	100.48	25.75	-1.9643	3.03139e-139	1.65651e-138
NAPB	716	915	4080	4549	16.5	18	85.86	90.1	17.25	87.98	2.3506	5.19257e-139	2.83606e-138
CADM2	84	116	1823	1968	1.94	2.28	38.36	38.98	2.11	38.67	4.1959	6.94084e-139	3.78902e-138
SNAP91	903	1249	5893	5974	20.82	24.57	124.02	118.33	22.695	121.175	2.4166	9.63988e-139	5.25979e-138
THSD7A	716	868	3953	4532	16.5	17.07	83.19	89.77	16.785	86.48	2.3652	1.28363e-138	7.00035e-138
MYO3B	157	192	2034	2281	3.62	3.78	42.8	45.18	3.7	43.99	3.5716	1.56987e-138	8.55706e-138
AREL1	8855	10582	4261	4750	204.12	208.14	89.67	94.08	206.13	91.875	-1.1658	2.11557e-138	1.15258e-137
DIP2B	3771	4501	10593	11784	86.93	88.53	222.92	233.41	87.73	228.165	1.3789	2.19848e-138	1.19715e-137
CHST15	4297	4899	1401	1492	99.05	96.36	29.48	29.55	97.705	29.515	-1.727	2.26745e-138	1.23408e-137
PPP4R3A	4922	5953	1811	1993	113.46	117.09	38.11	39.48	115.275	38.795	-1.5711	2.49253e-138	1.3559e-137
SMARCD2	9857	11399	5171	5363	227.22	224.21	108.82	106.23	225.715	107.525	-1.0698	2.59141e-138	1.40899e-137
CDC16	3009	3876	665	743	69.36	76.24	13.99	14.72	72.8	14.355	-2.3424	3.90397e-138	2.12158e-137
CALN1	132	238	3244	3417	3.04	4.68	68.27	67.68	3.86	67.975	4.1383	1.0895e-137	5.91783e-137
[truncated: 8,859 more rows]

## Sheet: 10858MM-vs-XP.all
id	MM1	MM2	XP1	XP2	MM1_CPM	MM2_CPM	XP1_CPM	XP2_CPM	MM_mean	XP_mean	log2(fc)	PValue	FDR
CYP26B1	597	680	3403	3411	13.76	13.38	141.32	144.32	13.57	142.82	3.3957	0	0
SLC4A11	35544	41723	1207	1086	819.33	820.67	50.13	45.95	820	48.04	-4.0933	0	0
RNF24	932	1079	4505	4798	21.48	21.22	187.09	203.01	21.35	195.05	3.1915	0	0
SPON2	745	909	5537	5353	17.17	17.88	229.95	226.49	17.525	228.22	3.7029	0	0
RNF4	7562	8743	190	190	174.31	171.97	7.89	8.04	173.14	7.965	-4.4421	0	0
WFS1	1877	2204	4648	4631	43.27	43.35	193.03	195.94	43.31	194.485	2.1669	0	0
CYTL1	971	1086	4210	4426	22.38	21.36	174.84	187.27	21.87	181.055	3.0494	0	0
OTOP1	266	291	7386	7841	6.13	5.72	306.73	331.76	5.925	319.245	5.7517	0	0
RPL9	23436	26844	47894	47161	540.23	528	1989	1995.4	534.115	1992.2	1.8991	0	0
CHRNA9	92	99	1907	1946	2.12	1.95	79.2	82.34	2.035	80.77	5.3107	0	0
LIMCH1	4734	5453	11028	11375	109.12	107.26	457.98	481.28	108.19	469.63	2.118	0	0
RASL11B	506	626	7625	7574	11.66	12.31	316.66	320.46	11.985	318.56	4.7323	0	0
PDGFRL	1099	1388	11463	11244	25.33	27.3	476.05	475.74	26.315	475.895	4.1767	0	0
ASAH1	3397	3989	8193	8123	78.3	78.46	340.25	343.69	78.38	341.97	2.1253	0	0
RPL34	9756	11693	40321	39453	224.89	229.99	1674.5	1669.28	227.44	1671.89	2.8779	0	0
SNCA	16467	18690	1083	1112	379.58	367.62	44.98	47.05	373.6	46.015	-3.0213	0	0
IBSP	42954	50903	33	26	990.14	1001.23	1.37	1.1	995.685	1.235	-9.655	0	0
CCNI	10329	12580	15770	15204	238.1	247.44	654.91	643.29	242.77	649.1	1.4189	0	0
PRC1	8107	9658	66	54	186.88	189.97	2.74	2.28	188.425	2.51	-6.2302	0	0
HNRNPDL	10678	12744	19778	20354	246.14	250.67	821.36	861.19	248.405	841.275	1.7599	0	0
AFF1	16361	19148	104	135	377.14	376.63	4.32	5.71	376.885	5.015	-6.2317	0	0
UHRF1	23964	28096	170	169	552.4	552.63	7.06	7.15	552.515	7.105	-6.281	0	0
TMPRSS9	211	241	12700	12479	4.86	4.74	527.42	527.99	4.8	527.705	6.7806	0	0
RPL36	13160	15465	19711	19166	303.35	304.19	818.58	810.92	303.77	814.75	1.4234	0	0
EEF2	197057	227870	187628	183900	4542.39	4482.06	7792.02	7780.9	4512.23	7786.46	0.7871	0	0
STK11	19288	22567	1278	1242	444.61	443.88	53.07	52.55	444.245	52.81	-3.0725	0	0
ARHGAP45	36710	41880	680	749	846.21	823.75	28.24	31.69	834.98	29.965	-4.8004	0	0
CFD	458	647	7159	6835	10.56	12.73	297.31	289.19	11.645	293.25	4.6543	0	0
RANBP3	8361	9772	11641	11208	192.73	192.21	483.44	474.22	192.47	478.83	1.3149	0	0
MYO1F	14782	16892	217	184	340.74	332.25	9.01	7.79	336.495	8.4	-5.3241	0	0
OAZ1	33472	39742	4821	4991	771.57	781.7	200.21	211.17	776.635	205.69	-1.9168	0	0
MKNK2	28137	34070	2574	2594	648.59	670.14	106.9	109.75	659.365	108.325	-2.6057	0	0
ISYNA1	7320	8699	26739	26340	168.73	171.1	1110.45	1114.46	169.915	1112.45	2.7109	0	0
TMEM59L	584	676	3988	4253	13.46	13.3	165.62	179.95	13.38	172.785	3.6908	0	0
ANP32B	19045	22871	994	899	439.01	449.86	41.28	38.04	444.435	39.66	-3.4862	0	0
OCEL1	883	1075	4242	4032	20.35	21.14	176.17	170.6	20.745	173.385	3.0631	0	0
PLPP2	750	894	5861	6022	17.29	17.58	243.4	254.79	17.435	249.095	3.8366	0	0
SLC35E1	7516	9137	245	265	173.25	179.72	10.17	11.21	176.485	10.69	-4.0452	0	0
ADAMTSL1	1200	1554	4590	4583	27.66	30.57	190.62	193.91	29.115	192.265	2.7233	0	0
RPS6	5012	5764	54909	52112	115.53	113.37	2280.32	2204.88	114.45	2242.6	4.2924	0	0
FREM1	618	744	4979	4939	14.25	14.63	206.77	208.97	14.44	207.87	3.8475	0	0
DOCK8	17407	20190	400	421	401.25	397.12	16.61	17.81	399.185	17.21	-4.5357	0	0
APBA1	3361	4016	9149	9662	77.47	78.99	379.95	408.8	78.23	394.375	2.3338	0	0
ISCA1	11535	13622	633	604	265.89	267.94	26.29	25.56	266.915	25.925	-3.364	0	0
GAS1	2985	3565	43145	41200	68.81	70.12	1791.77	1743.19	69.465	1767.48	4.6693	0	0
SYK	37697	42977	24	39	868.96	845.33	1	1.65	857.145	1.325	-9.3374	0	0
MTMR3	18931	21499	964	958	436.38	422.87	40.03	40.53	429.625	40.28	-3.4149	0	0
TBX3	496	623	4532	4528	11.43	12.25	188.21	191.58	11.84	189.895	4.0035	0	0
ACACB	1402	1657	5908	5964	32.32	32.59	245.35	252.34	32.455	248.845	2.9387	0	0
ANKRD13A	15951	18781	228	284	367.69	369.41	9.47	12.02	368.55	10.745	-5.1001	0	0
RPLP0	130002	151773	105600	103568	2996.69	2985.28	4385.47	4382.01	2990.99	4383.74	0.5515	0	0
MSI1	1840	2329	6636	6391	42.41	45.81	275.59	270.41	44.11	273	2.6297	0	0
MLEC	26825	30796	1101	986	618.35	605.74	45.72	41.72	612.045	43.72	-3.8073	0	0
SERPIND1	214	182	5090	5213	4.93	3.58	211.38	220.56	4.255	215.97	5.6655	0	0
CLDN5	785	965	10270	10364	18.1	18.98	426.5	438.51	18.54	432.505	4.544	0	0
TBX1	440	517	6856	6751	10.14	10.17	284.72	285.64	10.155	285.18	4.8116	0	0
BCL7A	8824	10507	360	365	203.4	206.67	14.95	15.44	205.035	15.195	-3.7542	0	0
ANAPC5	23186	27795	99	108	534.46	546.71	4.11	4.57	540.585	4.34	-6.9607	0	0
PPP1CC	14940	17980	1043	1164	344.38	353.66	43.31	49.25	349.02	46.28	-2.9148	0	0
SH2B3	9999	12293	411	389	230.49	241.8	17.07	16.46	236.145	16.765	-3.8161	0	0
HECTD4	32544	38107	2142	2014	750.18	749.54	88.96	85.21	749.86	87.085	-3.1061	0	0
RPL6	34393	39051	61673	59009	792.8	768.11	2561.22	2496.7	780.455	2528.96	1.6962	0	0
PEBP1	12676	15551	65	50	292.2	305.88	2.7	2.12	299.04	2.41	-6.9552	0	0
SLC27A6	84	72	2967	2950	1.94	1.42	123.22	124.82	1.68	124.02	6.206	0	0
LMNB1	17601	20685	788	828	405.72	406.86	32.72	35.03	406.29	33.875	-3.5842	0	0
SEMA6A	877	1055	3327	3299	20.22	20.75	138.17	139.58	20.485	138.875	2.7611	0	0
TRIM36	595	769	3920	3990	13.72	15.13	162.79	168.82	14.425	165.805	3.5228	0	0
NR2F1	911	1120	12299	12054	21	22.03	510.77	510.01	21.515	510.39	4.5682	0	0
ADGRV1	96	88	3005	3014	2.21	1.73	124.79	127.52	1.97	126.155	6.0009	0	0
RPS23	29209	33927	38754	36494	673.3	667.32	1609.42	1544.08	670.31	1576.75	1.2341	0	0
ACOT12	59	68	3777	3901	1.36	1.34	156.86	165.05	1.35	160.955	6.8976	0	0
NSA2	3376	4140	9355	9780	77.82	81.43	388.5	413.8	79.625	401.15	2.3328	0	0
HMGCR	3248	3710	6520	6355	74.87	72.97	270.77	268.88	73.92	269.825	1.868	0	0
SERINC5	17610	20524	609	667	405.93	403.69	25.29	28.22	404.81	26.755	-3.9194	0	0
IL6ST	18609	21648	945	980	428.96	425.8	39.25	41.46	427.38	40.355	-3.4047	0	0
ISL1	525	562	4702	4686	12.1	11.05	195.27	198.27	11.575	196.77	4.0874	0	0
RPL37	20850	23908	28742	27520	480.62	470.26	1193.63	1164.38	475.44	1179.01	1.3102	0	0
LIFR	17197	20710	105	92	396.41	407.35	4.36	3.89	401.88	4.125	-6.6062	0	0
SLC1A3	3378	4209	8285	7878	77.87	82.79	344.07	333.32	80.33	338.695	2.076	0	0
FECH	31761	37056	256	241	732.13	728.87	10.63	10.2	730.5	10.415	-6.1321	0	0
MBD2	8106	9335	340	329	186.85	183.61	14.12	13.92	185.23	14.02	-3.7238	0	0
RPL17	1040	1154	56251	53443	23.97	22.7	2336.05	2261.2	23.335	2298.62	6.6221	0	0
LOXHD1	967	1180	5316	5223	22.29	23.21	220.77	220.99	22.75	220.88	3.2793	0	0
AQP3	40	56	13353	13093	0.92	1.1	554.54	553.97	1.01	554.255	9.1001	0	0
TLN1	100623	118634	15742	15129	2319.47	2333.46	653.75	640.12	2326.47	646.935	-1.8464	0	0
PIP5K1C	11942	14289	970	934	275.28	281.06	40.28	39.52	278.17	39.9	-2.8015	0	0
PTPN11	16857	20315	244	242	388.57	399.58	10.13	10.24	394.075	10.185	-5.274	0	0
MCCC2	965	1207	3523	3479	22.24	23.74	146.31	147.2	22.99	146.755	2.6743	0	0
TLN2	5351	6023	26554	25747	123.35	118.47	1102.76	1089.37	120.91	1096.07	3.1803	0	0
CBS	201	309	3612	3293	4.63	6.08	150	139.33	5.355	144.665	4.7557	0	0
TRIM45	389	434	2504	2389	8.97	8.54	103.99	101.08	8.755	102.535	3.5499	0	0
ATP1A1	57386	66166	219222	209618	1322.81	1301.44	9104.09	8869.04	1312.12	8986.57	2.7759	0	0
CSTB	1641	1854	7018	6595	37.83	36.47	291.45	279.04	37.15	285.245	2.9408	0	0
BOC	2861	3375	10683	9805	65.95	66.38	443.66	414.85	66.165	429.255	2.6977	0	0
MAN1A2	2137	2353	5305	5317	49.26	46.28	220.31	224.96	47.77	222.635	2.2205	0	0
HGD	28	35	3545	3528	0.65	0.69	147.22	149.27	0.67	148.245	7.7896	0	0
UPK1B	284	348	3451	3279	6.55	6.84	143.32	138.74	6.695	141.03	4.3968	0	0
B4GALT4	1277	1422	4750	4710	29.44	27.97	197.26	199.28	28.705	198.27	2.7881	0	0
GJA5	100	110	23079	23586	2.31	2.16	958.45	997.94	2.235	978.195	8.7737	0	0
CLDN8	1080	1167	5437	5331	24.9	22.95	225.79	225.56	23.925	225.675	3.2377	0	0
ADAMTS1	1525	1829	6567	6225	35.15	35.98	272.72	263.38	35.565	268.05	2.914	0	0
APP	65985	76939	85651	81408	1521.03	1513.34	3557.01	3444.41	1517.18	3500.71	1.2063	0	0
CPOX	23556	27651	755	624	542.99	543.88	31.35	26.4	543.435	28.875	-4.2342	0	0
UBB	125015	152056	9734	9753	2881.74	2990.85	404.24	412.65	2936.3	408.445	-2.8458	0	0
CENPV	636	766	4324	3978	14.66	15.07	179.57	168.31	14.865	173.94	3.5486	0	0
SPAG5	8730	9435	198	191	201.24	185.58	8.22	8.08	193.41	8.15	-4.5687	0	0
ALDOC	2126	2626	94106	93371	49.01	51.65	3908.14	3950.57	50.33	3929.36	6.2867	0	0
RPA1	11660	13537	750	708	268.78	266.26	31.15	29.96	267.52	30.555	-3.1302	0	0
WDR81	9001	11048	165	196	207.48	217.31	6.85	8.29	212.395	7.57	-4.8103	0	0
CLDN4	640	859	11303	11540	14.75	16.9	469.4	488.26	15.825	478.83	4.9192	0	0
CLDN3	763	809	10328	10752	17.59	15.91	428.91	454.92	16.75	441.915	4.7215	0	0
PHEX	11618	13731	395	430	267.81	270.08	16.4	18.19	268.945	17.295	-3.9589	0	0
PITPNA	11293	12552	676	643	260.32	246.89	28.07	27.21	253.605	27.64	-3.1978	0	0
EPX	15987	18444	49	71	368.52	362.78	2.03	3	365.65	2.515	-7.1838	0	0
WSCD1	286	353	4107	4161	6.59	6.94	170.56	176.05	6.765	173.305	4.6791	0	0
HIPK1	20686	24846	370	375	476.84	488.71	15.37	15.87	482.775	15.62	-4.9499	0	0
RAB44	8377	9215	100	116	193.1	181.25	4.15	4.91	187.175	4.53	-5.3687	0	0
WASF2	17949	21051	1859	1813	413.74	414.06	77.2	76.71	413.9	76.955	-2.4272	0	0
AHDC1	3575	4694	9579	9091	82.41	92.33	397.81	384.64	87.37	391.225	2.1628	0	0
RPS6KA1	15725	18730	690	687	362.48	368.41	28.66	29.07	365.445	28.865	-3.6623	0	0
STMN1	8750	10488	471	453	201.7	206.29	19.56	19.17	203.995	19.365	-3.397	0	0
ADIPOR1	20120	24407	1912	1936	463.79	480.07	79.4	81.91	471.93	80.655	-2.5487	0	0
MAPKAPK2	10053	12420	366	359	231.73	244.29	15.2	15.19	238.01	15.195	-3.9694	0	0
CTSE	35139	41765	122	157	809.99	821.49	5.07	6.64	815.74	5.855	-7.1223	0	0
TMCC2	47956	55398	988	1044	1105.44	1089.64	41.03	44.17	1097.54	42.6	-4.6873	0	0
RPS10	9630	11223	82241	78478	221.98	220.75	3415.4	3320.44	221.365	3367.92	3.9274	0	0
CSRP1	16336	19001	60	61	376.56	373.74	2.49	2.58	375.15	2.535	-7.2093	0	0
RHOC	2885	3160	8144	8285	66.5	62.16	338.21	350.54	64.33	344.375	2.4204	0	0
SHROOM2	1290	1544	4365	4545	29.74	30.37	181.27	192.3	30.055	186.785	2.6357	0	0
RPL8	55228	65326	56347	54344	1273.07	1284.92	2340.04	2299.32	1278.99	2319.68	0.8589	0	0
TMEM35B	391	508	4365	3885	9.01	9.99	181.27	164.38	9.5	172.825	4.1852	0	0
PTPRU	2148	2573	13130	12758	49.51	50.61	545.28	539.8	50.06	542.54	3.438	0	0
EPB41	45311	51857	3626	3387	1044.47	1019.99	150.58	143.31	1032.23	146.945	-2.8124	0	0
GNL2	2492	2770	14678	14364	57.44	54.48	609.56	607.75	55.96	608.655	3.4432	0	0
EIF3I	4552	5717	10543	10440	104.93	112.45	437.84	441.72	108.69	439.78	2.0166	0	0
SRRM1	10493	12820	21698	20861	241.88	252.16	901.1	882.64	247.02	891.87	1.8522	0	0
RPL11	25747	30342	42747	41140	593.5	596.81	1775.24	1740.65	595.155	1757.94	1.5626	0	0
CAP1	31422	37901	2179	2224	724.31	745.49	90.49	94.1	734.9	92.295	-2.9932	0	0
PABPC4	21964	25303	1543	1627	506.3	497.69	64.08	68.84	501.995	66.46	-2.9171	0	0
TBX2	4412	5144	8936	8446	101.7	101.18	371.1	357.35	101.44	364.225	1.8442	0	0
RFLNB	8664	10342	182	209	199.72	203.42	7.56	8.84	201.57	8.2	-4.6195	0	0
AUTS2	583	635	3853	3895	13.44	12.49	160.01	164.8	12.965	162.405	3.6469	0	0
ATP2A3	18948	23024	1273	1220	436.77	452.87	52.87	51.62	444.82	52.245	-3.0899	0	0
RPL24	11773	13633	25787	24947	271.38	268.15	1070.91	1055.52	269.765	1063.21	1.9787	0	0
ZPLD1	176	259	3647	3798	4.06	5.09	151.46	160.7	4.575	156.08	5.0924	0	0
CYBB	21812	26240	87	90	502.79	516.12	3.61	3.81	509.455	3.71	-7.1014	0	0
RPL31	21258	24571	28483	27674	490.02	483.3	1182.87	1170.9	486.66	1176.88	1.274	0	0
GAS6	12646	14568	395	421	291.5	286.54	16.4	17.81	289.02	17.105	-4.0787	0	0
ITGBL1	1152	1330	6735	6454	26.55	26.16	279.7	273.07	26.355	276.385	3.3905	0	0
ZIC2	3567	4081	6944	6955	82.22	80.27	288.38	294.27	81.245	291.325	1.8423	0	0
STK24	10187	11864	679	651	234.82	233.36	28.2	27.54	234.09	27.87	-3.0703	0	0
SOX21	116	164	3729	3480	2.67	3.23	154.86	147.24	2.95	151.05	5.6782	0	0
TPT1	78253	93692	77079	77251	1803.82	1842.86	3201.02	3268.53	1823.34	3234.78	0.8271	0	0
LCP1	37729	42246	140	110	869.7	830.95	5.81	4.65	850.325	5.23	-7.3451	0	0
NR4A1	1810	2141	23762	24405	41.72	42.11	986.81	1032.59	41.915	1009.7	4.5903	0	0
ADCY6	14327	16649	380	437	330.25	327.48	15.78	18.49	328.865	17.135	-4.2625	0	0
DDX23	9930	11456	596	609	228.9	225.33	24.75	25.77	227.115	25.26	-3.1685	0	0
FKBP11	425	437	3435	3132	9.8	8.6	142.65	132.52	9.2	137.585	3.9025	0	0
ITGA7	923	1138	3435	3411	21.28	22.38	142.65	144.32	21.83	143.485	2.7165	0	0
CD63	11904	13888	14043	14178	274.4	273.17	583.19	599.88	273.785	591.535	1.1114	0	0
MYL6	33757	39351	4747	4657	778.14	774.01	197.14	197.04	776.075	197.09	-1.9773	0	0
ESYT1	15364	18497	717	715	354.16	363.82	29.78	30.25	358.99	30.015	-3.5802	0	0
NACA	17439	20450	26525	26444	401.99	402.24	1101.56	1118.86	402.115	1110.21	1.4652	0	0
COL2A1	54720	64151	63860	61365	1261.36	1261.81	2652.05	2596.38	1261.59	2624.22	1.0566	0	0
NCKAP1L	15421	18301	112	98	355.47	359.97	4.65	4.15	357.72	4.4	-6.3452	0	0
CBX5	13647	16962	1036	1093	314.58	333.63	43.02	46.25	324.105	44.635	-2.8602	0	0
PCBP3	1052	1283	25709	24602	24.25	25.24	1067.67	1040.92	24.745	1054.3	5.413	0	0
KRT18	973	984	7851	7188	22.43	19.35	326.05	304.13	20.89	315.09	3.9149	0	0
KRT8	660	748	38466	36641	15.21	14.71	1597.46	1550.3	14.96	1573.88	6.7171	0	0
KRT7	549	651	48619	46202	12.66	12.8	2019.1	1954.83	12.73	1986.96	7.2862	0	0
FAIM2	1300	1524	3754	3832	29.97	29.98	155.9	162.13	29.975	159.015	2.4073	0	0
RACGAP1	8261	9616	99	117	190.43	189.14	4.11	4.95	189.785	4.53	-5.3887	0	0
FRY	4237	4805	7679	7941	97.67	94.51	318.9	335.99	96.09	327.445	1.7688	0	0
GJB2	11751	13932	42908	43092	270.87	274.03	1781.93	1823.24	272.45	1802.59	2.726	0	0
ME3	591	694	3659	3614	13.62	13.65	151.96	152.91	13.635	152.435	3.4828	0	0
RRM1	18599	22013	827	751	428.73	432.98	34.34	31.78	430.855	33.06	-3.704	0	0
PDE2A	17694	20318	519	436	407.87	399.64	21.55	18.45	403.755	20	-4.3354	0	0
RPS3	39969	48470	92142	87885	921.33	953.37	3826.58	3718.46	937.35	3772.52	2.0089	0	0
SERPINH1	39745	46899	6016	6086	916.17	922.47	249.84	257.5	919.32	253.67	-1.8576	0	0
PICALM	20835	24368	1505	1573	480.27	479.3	62.5	66.55	479.785	64.525	-2.8945	0	0
SYTL2	1844	2091	4992	4726	42.51	41.13	207.31	199.96	41.82	203.635	2.2837	0	0
APBB1	2421	2834	12163	11779	55.81	55.74	505.12	498.38	55.775	501.75	3.1693	0	0
SON	36515	41903	36607	36254	841.71	824.21	1520.26	1533.92	832.96	1527.09	0.8745	0	0
RCSD1	10376	11814	178	214	239.18	232.37	7.39	9.05	235.775	8.22	-4.8421	0	0
SIK1	4693	5385	28734	27536	108.18	105.92	1193.3	1165.06	107.05	1179.18	3.4614	0	0
GPR37L1	673	779	5045	4801	15.51	15.32	209.51	203.13	15.415	206.32	3.7425	0	0
AZIN2	194	234	2863	2471	4.47	4.6	118.9	104.55	4.535	111.725	4.6227	0	0
ST8SIA1	774	893	3365	3385	17.84	17.56	139.75	143.22	17.7	141.485	2.9988	0	0
BCAT1	853	913	3937	3765	19.66	17.96	163.5	159.3	18.81	161.4	3.1011	0	0
ITPR2	2355	2848	8997	8703	54.29	56.02	373.64	368.23	55.155	370.935	2.7496	0	0
PPFIBP2	2876	3753	35681	34509	66.3	73.82	1481.8	1460.09	70.06	1470.94	4.392	0	0
PKP2	231	249	22825	21597	5.32	4.9	947.9	913.78	5.11	930.84	7.5091	0	0
FBLN1	2165	2486	20711	19806	49.91	48.9	860.11	838	49.405	849.055	4.1031	0	0
PARVB	13157	15113	98	100	303.28	297.26	4.07	4.23	300.27	4.15	-6.177	0	0
KDM7A	7097	8136	44559	41485	163.59	160.03	1850.5	1755.25	161.81	1802.88	3.4779	0	0
RAB19	342	332	4015	3860	7.88	6.53	166.74	163.32	7.205	165.03	4.5176	0	0
PTN	6335	7259	9646	9568	146.03	142.78	400.59	404.83	144.405	402.71	1.4796	0	0
SLC6A13	741	868	3298	3315	17.08	17.07	136.96	140.26	17.075	138.61	3.0211	0	0
TMTC1	1231	1524	9407	9832	28.38	29.98	390.66	416	29.18	403.33	3.7889	0	0
CD74	21232	24848	1150	1074	489.42	488.74	47.76	45.44	489.08	46.6	-3.3917	0	0
VWF	20476	24302	885	975	472	478.01	36.75	41.25	475.005	39	-3.6064	0	0
BPGM	30029	35561	365	386	692.2	699.46	15.16	16.33	695.83	15.745	-5.4658	0	0
RPS14	39423	43720	71025	67381	908.74	859.94	2949.61	2850.92	884.34	2900.26	1.7135	0	0
CCNG1	3076	3951	23171	24100	70.91	77.71	962.27	1019.68	74.31	990.975	3.7372	0	0
ADAMTS2	8473	10387	43	66	195.31	204.31	1.79	2.79	199.81	2.29	-6.4471	0	0
DOCK2	12203	14537	88	87	281.29	285.93	3.65	3.68	283.61	3.665	-6.274	0	0
SLIT3	4552	5566	9230	9258	104.93	109.48	383.31	391.71	107.205	387.51	1.8539	0	0
WWC1	1467	1708	4687	4367	33.82	33.6	194.65	184.77	33.71	189.71	2.4925	0	0
PDLIM4	406	487	2748	2662	9.36	9.58	114.12	112.63	9.47	113.375	3.5816	0	0
SHROOM1	212	224	2447	2742	4.89	4.41	101.62	116.02	4.65	108.82	4.5486	0	0
DUSP1	2613	2936	13216	12897	60.23	57.75	548.85	545.68	58.99	547.265	3.2137	0	0
ARHGEF37	1803	2009	4885	5099	41.56	39.52	202.87	215.74	40.54	209.305	2.3682	0	0
GRK6	13359	15862	374	376	307.94	312	15.53	15.91	309.97	15.72	-4.3015	0	0
DBN1	1230	1488	4622	4408	28.35	29.27	191.95	186.5	28.81	189.225	2.7155	0	0
FAM193B	9335	10826	507	493	215.18	212.94	21.06	20.86	214.06	20.96	-3.3523	0	0
EGR1	2429	3072	17127	16753	55.99	60.42	711.27	708.83	58.205	710.05	3.6087	0	0
ANO4	191	247	2381	2263	4.4	4.86	98.88	95.75	4.63	97.315	4.3936	0	0
STAB2	7668	8908	192	209	176.76	175.21	7.97	8.84	175.985	8.405	-4.3881	0	0
TMPO	19080	23472	1591	1565	439.82	461.68	66.07	66.22	450.75	66.145	-2.7686	0	0
RPS16	28860	33059	40965	39208	665.26	650.25	1701.24	1658.91	657.755	1680.08	1.3529	0	0
OTOGL	996	1019	87301	90518	22.96	20.04	3625.53	3829.86	21.5	3727.7	7.4378	0	0
PTPRQ	951	1190	6853	6945	21.92	23.41	284.6	293.85	22.665	289.225	3.6737	0	0
CSRP2	990	1226	9522	9294	22.82	24.11	395.44	393.23	23.465	394.335	4.0708	0	0
CTTNBP2	528	711	3482	3320	12.17	13.98	144.6	140.47	13.075	142.535	3.4464	0	0
PTPRZ1	2228	2893	9968	10383	51.36	56.9	413.96	439.31	54.13	426.635	2.9785	0	0
CELSR1	1819	2150	5370	4924	41.93	42.29	223.01	208.34	42.11	215.675	2.3566	0	0
KIF21A	1384	1583	5469	5584	31.9	31.14	227.12	236.26	31.52	231.69	2.8779	0	0
SEMA3A	453	521	4031	4391	10.44	10.25	167.4	185.79	10.345	176.595	4.0934	0	0
CEP41	1047	1096	9287	9635	24.13	21.56	385.68	407.66	22.845	396.67	4.118	0	0
NCAPH2	13480	15276	144	111	310.73	300.47	5.98	4.7	305.6	5.34	-5.8387	0	0
TSPAN3	5494	6505	14347	14404	126.64	127.95	595.82	609.44	127.295	602.63	2.2431	0	0
ACSBG1	143	129	3315	3405	3.3	2.54	137.67	144.07	2.92	140.87	5.5923	0	0
TPM1	18222	20622	1428	1437	420.04	405.62	59.3	60.8	412.83	60.05	-2.7813	0	0
MYO9A	2642	3195	6162	6014	60.9	62.84	255.9	254.46	61.87	255.18	2.0442	0	0
NEO1	6961	8188	9560	9395	160.46	161.05	397.02	397.51	160.755	397.265	1.3052	0	0
NPTN	10182	11599	17326	17611	234.71	228.15	719.53	745.13	231.43	732.33	1.6619	0	0
CSK	16514	19320	821	854	380.67	380.01	34.1	36.13	380.34	35.115	-3.4371	0	0
KLF13	14643	17483	71	82	337.54	343.88	2.95	3.47	340.71	3.21	-6.7298	0	0
NEDD4	33744	39845	418	408	777.84	783.73	17.36	17.26	780.785	17.31	-5.4952	0	0
RSL24D1	1784	1967	8125	8075	41.12	38.69	337.42	341.66	39.905	339.54	3.0889	0	0
MYEF2	3758	4425	10027	9540	86.63	87.04	416.41	403.64	86.835	410.025	2.2394	0	0
SERF2	11705	13575	811	832	269.81	267.01	33.68	35.2	268.41	34.44	-2.9623	0	0
FES	13862	15708	214	242	319.53	308.97	8.89	10.24	314.25	9.565	-5.038	0	0
CEMIP	4092	4825	14463	15151	94.33	94.9	600.64	641.05	94.615	620.845	2.7141	0	0
NR2F2	984	1187	4261	4187	22.68	23.35	176.96	177.15	23.015	177.055	2.9436	0	0
ALDH1A3	1821	2125	11049	10484	41.98	41.8	458.86	443.58	41.89	451.22	3.4292	0	0
DPP8	11317	13681	103	78	260.87	269.1	4.28	3.3	264.985	3.79	-6.1276	0	0
RPL4	66658	77926	137083	131506	1536.54	1532.76	5692.94	5564.08	1534.65	5628.51	1.8748	0	0
SMAD6	1413	1775	6060	5385	32.57	34.91	251.67	227.84	33.74	239.755	2.829	0	0
SKOR1	90	144	2956	2616	2.07	2.83	122.76	110.68	2.45	116.72	5.5741	0	0
TET3	9352	11250	91	84	215.57	221.28	3.78	3.55	218.425	3.665	-5.8972	0	0
MTHFD2	2669	3178	9161	8899	61.52	62.51	380.45	376.52	62.015	378.485	2.6095	0	0
MXD1	14719	17210	245	240	339.29	338.51	10.17	10.15	338.9	10.16	-5.0599	0	0
GFPT2	602	600	4073	4238	13.88	11.8	169.15	179.31	12.84	174.23	3.7623	0	0
CDS2	17083	20350	740	790	393.78	400.27	30.73	33.43	397.025	32.08	-3.6295	0	0
PCNA	19353	21184	1387	1342	446.11	416.68	57.6	56.78	431.395	57.19	-2.9152	0	0
MAT2A	6114	7481	13900	13143	140.93	147.15	577.25	556.09	144.04	566.67	1.976	0	0
SFRP1	793	891	28936	27978	18.28	17.53	1201.69	1183.76	17.905	1192.72	6.0578	0	0
SLC25A37	61289	73074	52	44	1412.78	1437.32	2.16	1.86	1425.05	2.01	-9.4696	0	0
NEFM	6244	7017	15737	15242	143.93	138.02	653.54	644.9	140.975	649.22	2.2033	0	0
NEFL	4624	5270	16755	16166	106.59	103.66	695.82	683.99	105.125	689.905	2.7143	0	0
DPYSL2	1196	1417	7934	7890	27.57	27.87	329.49	333.83	27.72	331.66	3.5807	0	0
XPO7	36482	44368	1936	2065	840.95	872.69	80.4	87.37	856.82	83.885	-3.3525	0	0
DMTN	15343	18041	1038	998	353.67	354.86	43.11	42.23	354.265	42.67	-3.0535	0	0
RHOBTB2	2782	3158	6159	5901	64.13	62.12	255.78	249.67	63.125	252.725	2.0013	0	0
ANK1	43564	51318	1676	1706	1004.2	1009.39	69.6	72.18	1006.79	70.89	-3.828	0	0
AP3M2	1218	1431	4243	3934	28.08	28.15	176.21	166.45	28.115	171.33	2.6074	0	0
PLEKHA2	10672	12349	471	445	246	242.9	19.56	18.83	244.45	19.195	-3.6707	0	0
DNMT1	31450	36199	4042	3889	724.96	712.01	167.86	164.55	718.485	166.205	-2.112	0	0
ACP5	28461	33451	2018	1882	656.06	657.96	83.81	79.63	657.01	81.72	-3.0072	0	0
DVL2	775	905	3720	3696	17.86	17.8	154.49	156.38	17.83	155.435	3.1239	0	0
PPFIBP1	3086	3978	35164	32955	71.14	78.24	1460.33	1394.34	74.69	1427.34	4.2563	0	0
ARSI	200	222	4562	4357	4.61	4.37	189.46	184.35	4.49	186.905	5.3794	0	0
SNRNP27	726	740	3683	3540	16.74	14.56	152.95	149.78	15.65	151.365	3.2738	0	0
NUP107	3343	3976	7640	7569	77.06	78.21	317.28	320.25	77.635	318.765	2.0377	0	0
ABCB10	19640	23342	555	548	452.72	459.12	23.05	23.19	455.92	23.12	-4.3016	0	0
USH1C	1679	1774	14881	14536	38.7	34.89	617.99	615.03	36.795	616.51	4.0665	0	0
OTOG	12260	14310	107666	104946	282.61	281.47	4471.27	4440.32	282.04	4455.8	3.9817	0	0
PLEKHA7	1268	1578	10469	10060	29.23	31.04	434.77	425.64	30.135	430.205	3.8355	0	0
RPS13	12407	14138	21852	21133	286	278.09	907.49	894.15	282.045	900.82	1.6753	0	0
SOX6	7992	8830	131	130	184.22	173.68	5.44	5.5	178.95	5.47	-5.0319	0	0
GAS2	4572	5470	14859	15025	105.39	107.59	617.08	635.72	106.49	626.4	2.5564	0	0
ANO5	152	190	2316	2297	3.5	3.74	96.18	97.19	3.62	96.685	4.7392	0	0
GALNT18	828	982	3721	3886	19.09	19.32	154.53	164.42	19.205	159.475	3.0538	0	0
RASSF10	175	152	2635	2494	4.03	2.99	109.43	105.52	3.51	107.475	4.9364	0	0
SBF2	3220	3937	11955	11284	74.22	77.44	496.48	477.43	75.83	486.955	2.6829	0	0
RAG1	7990	9752	59	42	184.18	191.82	2.45	1.78	188	2.115	-6.4739	0	0
PACSIN3	1361	1651	5183	5139	31.37	32.47	215.25	217.43	31.92	216.34	2.7608	0	0
MDK	916	1106	13362	13305	21.11	21.75	554.91	562.94	21.43	558.925	4.705	0	0
DGKZ	21755	25107	1507	1276	501.48	493.84	62.58	53.99	497.66	58.285	-3.094	0	0
LARGE2	180	297	4472	4275	4.15	5.84	185.72	180.88	4.995	183.3	5.1976	0	0
CHST1	198	233	3459	3330	4.56	4.58	143.65	140.89	4.57	142.27	4.9603	0	0
SHANK2	525	772	5829	5856	12.1	15.18	242.07	247.77	13.64	244.92	4.1664	0	0
LMO2	12778	15013	112	137	294.55	295.3	4.65	5.8	294.925	5.225	-5.8188	0	0
MADD	7427	8886	10821	10770	171.2	174.78	449.39	455.68	172.99	452.535	1.3873	0	0
SPI1	8878	10253	63	48	204.65	201.67	2.62	2.03	203.16	2.325	-6.4492	0	0
FNBP4	8069	9738	20265	19250	186	191.54	841.59	814.48	188.77	828.035	2.1331	0	0
HIPK3	7490	9106	147	126	172.65	179.11	6.1	5.33	175.88	5.715	-4.9437	0	0
DEPDC7	103	174	3528	3481	2.37	3.42	146.51	147.28	2.895	146.895	5.6651	0	0
MPPED2	270	320	2283	2427	6.22	6.29	94.81	102.69	6.255	98.75	3.9807	0	0
FADS2	4270	4903	16253	16060	98.43	96.44	674.97	679.51	97.435	677.24	2.7972	0	0
FEN1	10035	12263	307	376	231.32	241.21	12.75	15.91	236.265	14.33	-4.0433	0	0
PPP6R3	11248	12771	732	760	259.28	251.2	30.4	32.16	255.24	31.28	-3.0285	0	0
RPLP2	25430	30342	30996	30731	586.19	596.81	1287.24	1300.24	591.5	1293.74	1.1291	0	0
EEF1G	23400	26729	56322	53192	539.4	525.74	2339	2250.58	532.57	2294.79	2.1073	0	0
SPTBN2	1166	1261	7219	7223	26.88	24.8	299.8	305.61	25.84	302.705	3.5502	0	0
EHBP1L1	24689	29590	168	155	569.11	582.02	6.98	6.56	575.565	6.77	-6.4097	0	0
SIPA1	16310	18684	1028	948	375.96	367.5	42.69	40.11	371.73	41.4	-3.1666	0	0
ADCY7	11178	13648	212	209	257.67	268.45	8.8	8.84	263.06	8.82	-4.8985	0	0
SMPD3	12956	14486	554	549	298.65	284.93	23.01	23.23	291.79	23.12	-3.6577	0	0
SALL1	343	344	3994	3978	7.91	6.77	165.87	168.31	7.34	167.09	4.5087	0	0
CDT1	7286	8628	182	152	167.95	169.71	7.56	6.43	168.83	6.995	-4.5931	0	0
ANKRD11	17653	19371	29	36	406.92	381.02	1.2	1.52	393.97	1.36	-8.1783	0	0
RPL13	54716	63700	80492	78394	1261.27	1252.94	3342.76	3316.89	1257.11	3329.82	1.4053	0	0
TUBB3	1946	2308	4830	4788	44.86	45.4	200.59	202.58	45.13	201.585	2.1592	0	0
DHODH	997	1212	3594	3630	22.98	23.84	149.26	153.59	23.41	151.425	2.6934	0	0
WWP2	12252	14725	603	545	282.42	289.63	25.04	23.06	286.025	24.05	-3.572	0	0
CDH3	179	259	7274	7042	4.13	5.09	302.08	297.95	4.61	300.015	6.0241	0	0
COTL1	18341	22790	886	861	422.78	448.26	36.79	36.43	435.52	36.61	-3.5724	0	0
PLCG2	13615	16231	528	575	313.84	319.25	21.93	24.33	316.545	23.13	-3.7746	0	0
IRF8	12366	15079	204	179	285.05	296.59	8.47	7.57	290.82	8.02	-5.1804	0	0
GSE1	15249	18005	1357	1325	351.51	354.15	56.36	56.06	352.83	56.21	-2.6501	0	0
ZFPM1	19261	22905	945	889	443.99	450.53	39.25	37.61	447.26	38.43	-3.5408	0	0
CYBA	11204	13460	374	350	258.26	264.75	15.53	14.81	261.505	15.17	-4.1075	0	0
PLEKHG4	65	110	4311	4198	1.5	2.16	179.03	177.62	1.83	178.325	6.6065	0	0
FA2H	660	814	3065	3080	15.21	16.01	127.29	130.32	15.61	128.805	3.0446	0	0
ST3GAL2	8826	10395	439	425	203.45	204.46	18.23	17.98	203.955	18.105	-3.4938	0	0
CALB2	6860	7718	17205	17223	158.13	151.81	714.51	728.71	154.97	721.61	2.2192	0	0
NDRG4	9075	11091	21187	22256	209.19	218.15	879.88	941.66	213.67	910.77	2.0917	0	0
E2F4	13402	16452	412	475	308.93	323.6	17.11	20.1	316.265	18.605	-4.0874	0	0
DDAH1	555	650	3842	3723	12.79	12.79	159.55	157.52	12.79	158.535	3.6317	0	0
SGIP1	348	380	3300	3495	8.02	7.47	137.05	147.88	7.745	142.465	4.2012	0	0
ROR1	274	303	2754	3084	6.32	5.96	114.37	130.49	6.14	122.43	4.3176	0	0
AKR1A1	20559	24166	1547	1505	473.91	475.33	64.25	63.68	474.62	63.965	-2.8914	0	0
UROD	14467	16688	1072	1054	333.48	328.24	44.52	44.6	330.86	44.56	-2.8924	0	0
RPS8	30273	35035	50954	50004	697.83	689.12	2116.07	2115.69	693.475	2115.88	1.6093	0	0
TSPAN1	156	172	2483	2561	3.6	3.38	103.12	108.36	3.49	105.74	4.9212	0	0
TAL1	14731	17647	317	281	339.57	347.11	13.16	11.89	343.34	12.525	-4.7768	0	0
ARPC5	16847	19686	931	921	388.34	387.21	38.66	38.97	387.775	38.815	-3.3205	0	0
RPL5	37648	44838	54890	53533	867.83	881.94	2279.53	2265.01	874.885	2272.27	1.377	0	0
RGS5	3806	4601	9455	10176	87.73	90.5	392.66	430.55	89.115	411.605	2.2075	0	0
VCAM1	14162	16408	258	239	326.45	322.74	10.71	10.11	324.595	10.41	-4.9626	0	0
ASPM	6795	7896	104	96	156.63	155.31	4.32	4.06	155.97	4.19	-5.2182	0	0
PTPRC	15980	18993	214	188	368.36	373.58	8.89	7.95	370.97	8.42	-5.4613	0	0
FNDC7	888	1213	4330	4392	20.47	23.86	179.82	185.83	22.165	182.825	3.0441	0	0
MYH9	97759	113240	9758	9409	2253.46	2227.36	405.24	398.1	2240.41	401.67	-2.4797	0	0
HMOX1	13159	14556	450	411	303.33	286.31	18.69	17.39	294.82	18.04	-4.0306	0	0
TPR	12724	15180	200	223	293.3	298.58	8.31	9.44	295.94	8.875	-5.0594	0	0
HMCN1	1505	1730	6124	5804	34.69	34.03	254.32	245.57	34.36	249.945	2.8628	0	0
SREBF2	12493	14719	994	969	287.98	289.51	41.28	41	288.745	41.14	-2.8112	0	0
SUN2	27684	32263	1145	1095	638.15	634.59	47.55	46.33	636.37	46.94	-3.761	0	0
CBX6	10316	12578	317	366	237.8	247.4	13.16	15.49	242.6	14.325	-4.082	0	0
RPL3	51804	60112	120917	116142	1194.14	1182.37	5021.58	4914.02	1188.26	4967.8	2.0638	0	0
ATF4	12661	14563	24670	23329	291.85	286.45	1024.52	987.06	289.15	1005.79	1.7984	0	0
TNRC6B	13578	16281	648	592	312.99	320.24	26.91	25.05	316.615	25.98	-3.6073	0	0
SOX10	2573	2901	12778	12540	59.31	57.06	530.66	530.57	58.185	530.615	3.1889	0	0
RAC2	35223	41327	141	145	811.93	812.88	5.86	6.14	812.405	6	-7.0811	0	0
IPPK	942	1061	17528	17027	21.71	20.87	727.92	720.42	21.29	724.17	5.0881	0	0
GPX1	89498	103069	864	774	2063.03	2027.3	35.88	32.75	2045.16	34.315	-5.8972	0	0
MST1	416	430	2904	2680	9.59	8.46	120.6	113.39	9.025	116.995	3.6964	0	0
RNF123	24734	28381	1658	1753	570.15	558.24	68.86	74.17	564.195	71.515	-2.9799	0	0
IP6K1	18822	21508	1668	1494	433.87	423.05	69.27	63.21	428.46	66.24	-2.6934	0	0
SLC38A3	682	760	2843	2855	15.72	14.95	118.07	120.8	15.335	119.435	2.9613	0	0
GNAI2	46113	53531	2462	2166	1062.96	1052.92	102.24	91.64	1057.94	96.94	-3.448	0	0
SEMA3B	2642	3265	10117	9783	60.9	64.22	420.15	413.92	62.56	417.035	2.7369	0	0
CACNA2D2	444	607	3083	2984	10.23	11.94	128.03	126.25	11.085	127.14	3.5197	0	0
WFDC2	923	1118	26547	25257	21.28	21.99	1102.47	1068.64	21.635	1085.56	5.6489	0	0
ARHGDIB	36498	42100	139	113	841.32	828.08	5.77	4.78	834.7	5.275	-7.3059	0	0
RPL32	16323	18847	32213	31271	376.26	370.71	1337.78	1323.09	373.485	1330.43	1.8328	0	0
SLC6A6	14707	17293	375	341	339.01	340.14	15.57	14.43	339.575	15	-4.5007	0	0
TXNRD3	689	943	4403	4042	15.88	18.55	182.85	171.02	17.215	176.935	3.3615	0	0
MCM2	25095	30138	178	190	578.47	592.8	7.39	8.04	585.635	7.715	-6.2462	0	0
GATA2	2608	3140	12106	12205	60.12	61.76	502.75	516.4	60.94	509.575	3.0638	0	0
LAMB2	14759	17848	855	756	340.21	351.06	35.51	31.99	345.635	33.75	-3.3563	0	0
FLNB	10836	12039	46472	45350	249.78	236.8	1929.94	1918.78	243.29	1924.36	2.9836	0	0
IL17RD	726	790	3603	3302	16.74	15.54	149.63	139.71	16.14	144.67	3.1641	0	0
CACNA1D	1404	1861	14486	13640	32.36	36.6	601.59	577.12	34.48	589.355	4.0953	0	0
NUP210	28211	32796	1290	1350	650.3	645.08	53.57	57.12	647.69	55.345	-3.5488	0	0
GLT8D1	1772	2225	4937	5039	40.85	43.76	205.03	213.2	42.305	209.115	2.3054	0	0
DKK3	4437	4837	18614	18057	102.28	95.14	773.02	764	98.71	768.51	2.9608	0	0
SVIP	1795	2161	8193	7750	41.38	42.51	340.25	327.91	41.945	334.08	2.9936	0	0
COX4I1	21632	25078	1309	1352	498.64	493.27	54.36	57.2	495.955	55.78	-3.1524	0	0
HYDIN	438	517	3578	3695	10.1	10.17	148.59	156.34	10.135	152.465	3.9111	0	0
EIF3D	9122	10339	29479	29303	210.27	203.36	1224.24	1239.82	206.815	1232.03	2.5746	0	0
PDE12	781	930	4665	4296	18	18.29	193.73	181.77	18.145	187.75	3.3712	0	0
SNAP25	4990	6056	10483	10076	115.03	119.12	435.35	426.32	117.075	430.835	1.8797	0	0
SPTBN1	27736	32410	36145	34536	639.35	637.48	1501.07	1461.23	638.415	1481.15	1.2142	0	0
USH2A	100	142	2465	2367	2.31	2.79	102.37	100.15	2.55	101.26	5.3114	0	0
WDR26	20740	24761	1594	1543	478.08	487.03	66.2	65.29	482.555	65.745	-2.8757	0	0
LBR	19511	23254	64	73	449.75	457.39	2.66	3.09	453.57	2.875	-7.3016	0	0
EPHX1	3580	4060	19813	19106	82.52	79.86	822.82	808.38	81.19	815.6	3.3285	0	0
ACBD3	3277	3741	6228	6365	75.54	73.58	258.64	269.31	74.56	263.975	1.8239	0	0
XDH	10626	11853	104	128	244.94	233.14	4.32	5.42	239.04	4.87	-5.6172	0	0
GALNT14	140	151	2403	2235	3.23	2.97	99.79	94.56	3.1	97.175	4.9702	0	0
NAGLU	2743	3264	6957	6485	63.23	64.2	288.92	274.38	63.715	281.65	2.1442	0	0
CAPN11	427	474	4835	4688	9.84	9.32	200.79	198.35	9.58	199.57	4.3807	0	0
PTK7	2535	2846	6704	6401	58.43	55.98	278.41	270.83	57.205	274.62	2.2632	0	0
CUL9	2480	3047	9941	9598	57.17	59.93	412.84	406.1	58.55	409.47	2.806	0	0
TTBK1	807	1023	11266	10510	18.6	20.12	467.87	444.68	19.36	456.275	4.5588	0	0
JAG1	1294	1434	7056	7137	29.83	28.21	293.03	301.97	29.02	297.5	3.3578	0	0
PLEK	15335	18519	39	49	353.49	364.26	1.62	2.07	358.875	1.845	-7.6037	0	0
PNO1	991	1274	5426	5017	22.84	25.06	225.34	212.27	23.95	218.805	3.1915	0	0
SLC1A4	523	737	4893	4785	12.06	14.5	203.2	202.46	13.28	202.83	3.9329	0	0
UGP2	1978	2218	8295	7869	45.6	43.63	344.48	332.94	44.615	338.71	2.9244	0	0
FBLN7	980	1063	8267	8111	22.59	20.91	343.32	343.18	21.75	343.25	3.9802	0	0
RRBP1	17008	19263	1285	1156	392.05	378.89	53.36	48.91	385.47	51.135	-2.9142	0	0
CFAP61	41	52	2679	2682	0.95	1.02	111.26	113.48	0.985	112.37	6.8339	0	0
SCCPDH	1101	1350	4903	4870	25.38	26.55	203.62	206.05	25.965	204.835	2.9798	0	0
GALNT2	9150	10476	495	463	210.92	206.06	20.56	19.59	208.49	20.075	-3.3765	0	0
FABP7	162	162	5837	5694	3.73	3.19	242.41	240.92	3.46	241.665	6.1261	0	0
CCN2	8122	9486	29126	28671	187.22	186.58	1209.58	1213.08	186.9	1211.33	2.6963	0	0
RPS12	34353	39477	40921	39068	791.88	776.49	1699.41	1652.99	784.185	1676.2	1.0959	0	0
SGK1	3867	4561	7875	7651	89.14	89.71	327.04	323.72	89.425	325.38	1.8634	0	0
MYB	12698	14742	42	50	292.7	289.97	1.74	2.12	291.335	1.93	-7.2379	0	0
AMD1	5612	6547	19711	21414	129.36	128.78	818.58	906.04	129.07	862.31	2.7401	0	0
FOXO3	17344	20847	1610	1585	399.8	410.05	66.86	67.06	404.925	66.96	-2.5963	0	0
EPHA7	685	660	4283	4375	15.79	12.98	177.87	185.11	14.385	181.49	3.6573	0	0
COL12A1	7966	9674	13860	14051	183.63	190.28	575.59	594.5	186.955	585.045	1.6459	0	0
EEF1A1	310660	368253	366066	354209	7161.07	7243.3	15202.4	14986.8	7202.19	15094.6	1.0675	0	0
COL9A1	1286	1548	27344	26689	29.64	30.45	1135.57	1129.22	30.045	1132.39	5.2361	0	0
ELOVL5	4024	5208	12633	12934	92.76	102.44	524.64	547.24	97.6	535.94	2.4571	0	0
TDRP	945	1049	5656	5777	21.78	20.63	234.89	244.43	21.205	239.66	3.4985	0	0
EIF4G1	34320	39978	2354	2353	791.11	786.34	97.76	99.56	788.725	98.66	-2.999	0	0
ABCC5	9644	11468	13056	12908	222.31	225.57	542.2	546.14	223.94	544.17	1.2809	0	0
PTMA	85491	98470	10849	11653	1970.66	1936.84	450.55	493.04	1953.75	471.795	-2.05	0	0
TFRC	22401	26362	899	869	516.37	518.52	37.33	36.77	517.445	37.05	-3.8039	0	0
CLDN1	542	720	5674	5900	12.49	14.16	235.64	249.63	13.325	242.635	4.1866	0	0
ATP13A4	86	104	4131	4036	1.98	2.05	171.56	170.77	2.015	171.165	6.4085	0	0
SOX2	322	428	8158	7662	7.42	8.42	338.79	324.18	7.92	331.485	5.3873	0	0
SERPINI1	376	518	4372	4434	8.67	10.19	181.57	187.6	9.43	184.585	4.2909	0	0
RARRES1	193	232	59347	62031	4.45	4.56	2464.63	2624.56	4.505	2544.59	9.1417	0	0
MBNL1	19498	24044	432	470	449.45	472.93	17.94	19.89	461.19	18.915	-4.6078	0	0
IGSF10	982	1237	3875	3892	22.64	24.33	160.93	164.67	23.485	162.8	2.7933	0	0
PFN2	1579	1945	16314	16543	36.4	38.26	677.51	699.94	37.33	688.725	4.2055	0	0
PCOLCE2	572	619	16020	15935	13.19	12.18	665.3	674.22	12.685	669.76	5.7224	0	0
CHST2	1865	2220	7705	7270	42.99	43.67	319.98	307.6	43.33	313.79	2.8564	0	0
CP	12083	14767	249	279	278.53	290.46	10.34	11.8	284.495	11.07	-4.6837	0	0
EPHA4	492	635	3227	3162	11.34	12.49	134.01	133.79	11.915	133.9	3.4903	0	0
EFHD1	1557	1733	16734	17793	35.89	34.09	694.95	752.83	34.99	723.89	4.3708	0	0
INPP5D	12774	14820	611	676	294.46	291.5	25.37	28.6	292.98	26.985	-3.4406	0	0
SNORC	41	50	3136	3127	0.95	0.98	130.24	132.3	0.965	131.27	7.0878	0	0
FAM168B	17195	19985	632	506	396.36	393.09	26.25	21.41	394.725	23.83	-4.05	0	0
OTOS	34865	42271	45807	46683	803.68	831.44	1902.32	1975.18	817.56	1938.75	1.2457	0	0
DNER	2142	2700	18460	17583	49.38	53.11	766.63	743.95	51.245	755.29	3.8815	0	0
TFDP2	15317	17486	225	182	353.07	343.94	9.34	7.7	348.505	8.52	-5.3542	0	0
RPS7	18217	21751	37150	35697	419.92	427.83	1542.81	1510.36	423.875	1526.59	1.8486	0	0
COLEC11	27	36	4493	4242	0.62	0.71	186.59	179.48	0.665	183.035	8.1045	0	0
RSAD2	14092	17108	59	39	324.84	336.5	2.45	1.65	330.67	2.05	-7.3336	0	0
MFSD2B	12165	14748	172	140	280.42	290.08	7.14	5.92	285.25	6.53	-5.449	0	0
FKBP1B	362	343	8287	8443	8.34	6.75	344.15	357.23	7.545	350.69	5.5385	0	0
CTSB	66689	77460	4081	3813	1537.26	1523.59	169.48	161.33	1530.42	165.405	-3.2099	0	0
PINX1	261	325	5883	5672	6.02	6.39	244.32	239.99	6.205	242.155	5.2864	0	0
OTOF	2813	3201	8869	8769	64.84	62.96	368.32	371.02	63.9	369.67	2.5324	0	0
CLU	30101	35136	260883	244681	693.86	691.1	10834.2	10352.6	692.48	10593.4	3.9353	0	0
MAPRE3	1118	1528	6929	6393	25.77	30.05	287.76	270.49	27.91	279.125	3.3221	0	0
TMEM214	5621	6367	10013	9416	129.57	125.23	415.83	398.4	127.4	407.115	1.6761	0	0
HSP90AB1	81233	92695	86871	84092	1872.51	1823.25	3607.68	3557.97	1847.88	3582.82	0.9552	0	0
BCLAF1	7776	8992	244	223	179.25	176.87	10.13	9.44	178.06	9.785	-4.1856	0	0
ELOVL4	272	292	3843	3984	6.27	5.74	159.6	168.56	6.005	164.08	4.7721	0	0
CSPG5	309	419	2957	2915	7.12	8.24	122.8	123.34	7.68	123.07	4.0022	0	0
NBEAL2	15396	17909	959	979	354.9	352.26	39.83	41.42	353.58	40.625	-3.1216	0	0
NKTR	12122	14293	667	687	279.43	281.13	27.7	29.07	280.28	28.385	-3.3037	0	0
AQP1	66046	77452	3200	2908	1522.44	1523.43	132.89	123.04	1522.93	127.965	-3.573	0	0
NCAPG2	7087	8501	185	179	163.36	167.21	7.68	7.57	165.285	7.625	-4.4381	0	0
LARP4B	7835	9072	276	290	180.61	178.44	11.46	12.27	179.525	11.865	-3.9194	0	0
GTPBP4	1805	2381	32099	31338	41.61	46.83	1333.04	1325.93	44.22	1329.48	4.91	0	0
BAMBI	120	156	4321	4120	2.77	3.07	179.45	174.32	2.92	176.885	5.9207	0	0
ARHGAP21	6723	7486	11725	11340	154.97	147.24	486.93	479.8	151.105	483.365	1.6776	0	0
FAM171A1	1729	2202	4897	4843	39.86	43.31	203.37	204.91	41.585	204.14	2.2954	0	0
ITGA8	1231	1473	6733	6658	28.38	28.97	279.62	281.7	28.675	280.66	3.291	0	0
FZD1	1646	2057	10381	9794	37.94	40.46	431.11	414.39	39.2	422.75	3.4309	0	0
AKAP9	4621	5116	21016	20556	106.52	100.63	872.78	869.73	103.575	871.255	3.0724	0	0
TFPI2	75	64	2999	3098	1.73	1.26	124.55	131.08	1.495	127.815	6.4178	0	0
COL1A2	730500	842951	12748	12042	16838.8	16580.3	529.41	509.5	16709.6	519.455	-5.0075	0	0
ICA1	695	884	4563	4700	16.02	17.39	189.5	198.86	16.705	194.18	3.539	0	0
TSPAN13	3581	4275	8216	8587	82.55	84.09	341.2	363.32	83.32	352.26	2.0799	0	0
AGR3	172	232	7699	8205	3.96	4.56	319.73	347.16	4.26	333.445	6.2905	0	0
FKBP14	826	951	3525	3905	19.04	18.71	146.39	165.22	18.875	155.805	3.0452	0	0
RPL15	18508	22175	41236	39537	426.63	436.17	1712.49	1672.83	431.4	1692.66	1.9722	0	0
TGFBR2	12556	15351	342	374	289.43	301.94	14.2	15.82	295.685	15.01	-4.3001	0	0
EIF1B	1865	2147	11189	10805	42.99	42.23	464.67	457.16	42.61	460.915	3.4352	0	0
[truncated: 10,377 more rows]

## Sheet: 12152MM-vs-XP.all
id	MM1	MM2	XP1	XP2	MM1_CPM	MM2_CPM	XP1_CPM	XP2_CPM	MM_mean	XP_mean	log2(fc)	PValue	FDR
[truncated: 12,152 more rows]
