# Supplementary material for: Single-cell atlas comparison across vertebrates reveals evolution of auditory cell types and mechanisms for hair cell regeneration
Source: Research Square preprint supplement (doi:10.21203/rs.3.rs-4508608/v1), 2024-06-28
Supplement: Supplementary file 4 [file eec4699b155c09c98dea0da0.xlsx]

## Sheet: mmhcmarkertop
	p_val	avg_log2FC	pct.1	pct.2	p_val_adj	cluster	gene
Slc26a5	2.02549e-10	3.0452	0.958	0.043	4.89561e-06	OHC	Slc26a5
Ocm	2.57814e-09	2.92344	0.979	0.391	6.23137e-05	OHC	Ocm
Plce1	2.74908e-09	2.34748	0.958	0.217	6.64453e-05	OHC	Plce1
Dnm3	1.24668e-08	2.50493	0.958	0.609	0.000301322	OHC	Dnm3
Dner	2.07637e-08	2.01153	0.917	0.391	0.000501859	OHC	Dner
Sh3gl3	5.51612e-08	2.47572	0.854	0.217	0.00133325	OHC	Sh3gl3
Lpin2	5.63222e-08	2.11164	0.938	0.739	0.00136131	OHC	Lpin2
Ikzf2	9.3654e-08	2.2624	0.896	0.261	0.00226362	OHC	Ikzf2
Cacna1d	1.14687e-07	1.68168	1	1	0.00277199	OHC	Cacna1d
Atp8a1	1.21552e-07	2.28481	0.854	0.478	0.00293792	OHC	Atp8a1
Strip2	1.96193e-07	2.26862	0.896	0.435	0.00474199	OHC	Strip2
Atp8a2	2.78129e-07	2.04474	0.833	0.174	0.00672238	OHC	Atp8a2
Galnt13	4.13581e-07	1.72909	0.938	0.957	0.00999625	OHC	Galnt13
Sorbs2	6.69451e-07	1.45866	0.979	1	0.0161806	OHC	Sorbs2
Dytn	6.90841e-07	1.41948	0.979	0.957	0.0166976	OHC	Dytn
Kcnn2	7.97939e-07	1.94874	0.854	0.391	0.0192862	OHC	Kcnn2
Chrna10	1.30583e-06	2.11514	0.729	0.043	0.0315619	OHC	Chrna10
Cables1	1.53651e-06	1.57327	0.875	0.522	0.0371375	OHC	Cables1
Gm30275	1.60211e-06	2.40937	0.75	0.217	0.038723	OHC	Gm30275
Gm31698	1.69731e-06	2.3725	0.708	0.087	0.0410239	OHC	Gm31698
Myo1h	2.47272e-06	1.93203	0.625	0	0.0597658	OHC	Myo1h
Nalf1	2.53358e-06	2.2394	0.875	0.652	0.0612365	OHC	Nalf1
Tmc1	5.00458e-06	1.02555	0.958	1	0.120961	OHC	Tmc1
Jph1	6.82276e-06	1.80156	0.708	0.13	0.164906	OHC	Jph1
Frmd5	7.90909e-06	1.96663	0.854	0.739	0.191163	OHC	Frmd5
Clic5	1.57383e-05	1.18003	0.833	0.478	0.380396	OHC	Clic5
Ankfn1	2.57328e-05	0.991834	1	1	0.621962	OHC	Ankfn1
Atp2b2	3.12641e-05	1.65118	0.812	0.478	0.755654	OHC	Atp2b2
1700025G04Rik	3.24451e-05	1.88998	0.729	0.304	0.784198	OHC	1700025G04Rik
Nefl	3.99933e-05	1.09953	0.875	0.739	0.966639	OHC	Nefl
Sh3rf3	4.26739e-05	2.21622	0.625	0.13	1	OHC	Sh3rf3
Aqp11	5.19891e-05	1.58106	0.542	0.043	1	OHC	Aqp11
Catsper2	5.46587e-05	1.54557	0.688	0.261	1	OHC	Catsper2
Cacnb2	5.86263e-05	1.51582	0.833	0.696	1	OHC	Cacnb2
Strc	6.19653e-05	1.82038	0.646	0.174	1	OHC	Strc
Dst	8.64869e-05	1.02291	0.958	1	1	OHC	Dst
Atp8b1	0.000110053	1.60657	0.604	0.13	1	OHC	Atp8b1
Magi3	0.000117195	0.906555	1	1	1	OHC	Magi3
Kalrn	0.000154677	1.3496	0.875	0.826	1	OHC	Kalrn
Lbh	0.000184328	0.950672	0.583	0.087	1	OHC	Lbh
Gm32742	0.000187949	1.41916	0.708	0.391	1	OHC	Gm32742
Mmd	0.000228365	1.3824	0.667	0.261	1	OHC	Mmd
Srgap1	0.000300493	0.848529	0.896	0.87	1	OHC	Srgap1
Sri	0.000302138	1.7505	0.604	0.217	1	OHC	Sri
Cachd1	0.000329971	1.34407	0.688	0.348	1	OHC	Cachd1
Aff3	0.00037931	1.78259	0.75	0.609	1	OHC	Aff3
Pdzph1	0.000400399	1.21483	0.458	0.043	1	OHC	Pdzph1
Palld	0.00040948	1.60705	0.604	0.217	1	OHC	Palld
Coch	0.000441309	1.16363	0.979	0.957	1	OHC	Coch
Cdc14a	0.000461661	1.08897	0.875	0.783	1	OHC	Cdc14a
Fth1	0.000495189	0.690758	1	1	1	OHC	Fth1
4930558C23Rik	0.000587382	1.52895	0.396	0	1	OHC	4930558C23Rik
1600022D10Rik	0.000589586	1.60966	0.458	0.043	1	OHC	1600022D10Rik
Olfm1	0.000688788	1.53421	0.5	0.087	1	OHC	Olfm1
Btbd9	0.000792821	0.866005	0.896	0.957	1	OHC	Btbd9
Ccdc186	0.000913697	1.3067	0.667	0.391	1	OHC	Ccdc186
Fchsd2	0.00095713	1.1514	0.667	0.435	1	OHC	Fchsd2
Ofcc1	0.00103025	2.19312	0.417	0.043	1	OHC	Ofcc1
Veph1	0.00104542	1.59	0.583	0.217	1	OHC	Veph1
CJ186046Rik	0.00108731	1.37294	0.417	0.043	1	OHC	CJ186046Rik
Ryr2	0.00113703	1.54933	0.479	0.087	1	OHC	Ryr2
Rps29	0.00124573	0.883157	0.833	0.696	1	OHC	Rps29
Negr1	0.00124619	1.66549	0.625	0.261	1	OHC	Negr1
Gm28376	0.00129747	1.20061	0.438	0.043	1	OHC	Gm28376
Lmod3	0.0013677	1.22847	0.354	0	1	OHC	Lmod3
Mgat5b	0.0013677	1.20128	0.354	0	1	OHC	Mgat5b
Kcnq4	0.00141674	1.37872	0.562	0.261	1	OHC	Kcnq4
D7Ertd443e	0.00145645	0.920247	0.938	0.87	1	OHC	D7Ertd443e
Nrp2	0.00153903	0.900135	0.646	0.304	1	OHC	Nrp2
Ablim2	0.00153996	1.03717	0.875	0.87	1	OHC	Ablim2
Sh2d4a	0.0015619	1.66212	0.438	0.087	1	OHC	Sh2d4a
Tmem229a	0.00160349	0.881771	0.521	0.13	1	OHC	Tmem229a
Gpam	0.00169057	0.756875	0.917	0.957	1	OHC	Gpam
Eea1	0.001815	1.05175	0.708	0.609	1	OHC	Eea1
Gfod1	0.00181719	1.51017	0.438	0.087	1	OHC	Gfod1
Spred1	0.00195526	1.60228	0.521	0.217	1	OHC	Spred1
Cox7b	0.00196449	0.878477	0.792	0.739	1	OHC	Cox7b
Erich3	0.00200812	1.36382	0.438	0.087	1	OHC	Erich3
Fam214a	0.00200933	1.04941	0.708	0.565	1	OHC	Fam214a
Gm12536	0.0020571	1.05834	0.333	0	1	OHC	Gm12536
Arhgap26.1	0.00214021	1.22145	0.688	0.609	1	OHC	Arhgap26.1
Auts2	0.0021726	0.586183	1	0.957	1	OHC	Auts2
Tub	0.0022173	1.11999	0.438	0.087	1	OHC	Tub
Lmo7	0.00226337	0.894172	0.958	1	1	OHC	Lmo7
Atp5o.1	0.00236857	0.954071	0.688	0.478	1	OHC	Atp5o.1
Ablim3	0.0024945	1.46804	0.479	0.13	1	OHC	Ablim3
Maml2	0.00276843	0.905441	0.917	0.957	1	OHC	Maml2
Chst11	0.00290533	1.27681	0.562	0.261	1	OHC	Chst11
Phldb1	0.00306609	1.15257	0.312	0	1	OHC	Phldb1
Sema3a	0.00309682	0.527533	0.938	0.739	1	OHC	Sema3a
Cpe	0.0031037	0.896136	0.729	0.522	1	OHC	Cpe
Hs3st3b1	0.00329541	1.05449	0.521	0.174	1	OHC	Hs3st3b1
Ankrd22	0.00335845	1.4139	0.521	0.217	1	OHC	Ankrd22
Gpr156	0.0034299	0.927553	0.896	0.87	1	OHC	Gpr156
Atp5h	0.00374474	0.860494	0.854	0.826	1	OHC	Atp5h
Map2	0.00396056	0.730667	0.958	1	1	OHC	Map2
Cox4i1	0.00403568	0.707833	0.938	0.957	1	OHC	Cox4i1
Fam172a	0.00425378	0.839556	0.917	0.826	1	OHC	Fam172a
Herc3	0.00477065	0.811991	0.604	0.304	1	OHC	Herc3
Sptb	0.00485355	1.06883	0.625	0.391	1	OHC	Sptb
Ext1	0.00492123	1.19079	0.771	0.87	1	OHC	Ext1
Nhlrc2	0.00493215	0.838344	0.875	0.826	1	OHC	Nhlrc2
Herc2	0.00518304	0.938797	0.688	0.565	1	OHC	Herc2
Iqgap2	0.00522094	1.39425	0.479	0.217	1	OHC	Iqgap2
Usp46	0.00613749	0.846807	0.833	0.609	1	OHC	Usp46
Spns3	0.00626805	1.15699	0.375	0.087	1	OHC	Spns3
Ctif	0.00643219	0.964895	0.5	0.217	1	OHC	Ctif
Gm10138	0.00658626	0.842615	0.333	0.043	1	OHC	Gm10138
Pdlim1	0.00664108	0.788526	0.271	0	1	OHC	Pdlim1
Gm16351	0.00664108	0.734804	0.271	0	1	OHC	Gm16351
Smurf1	0.00673862	1.03409	0.479	0.217	1	OHC	Smurf1
Nudcd3	0.00678317	0.725975	0.833	0.739	1	OHC	Nudcd3
Cox6c	0.00725814	0.822002	0.938	1	1	OHC	Cox6c
Dock9	0.00788947	1.04841	0.625	0.565	1	OHC	Dock9
Disc1	0.00803853	1.45733	0.542	0.304	1	OHC	Disc1
Rpsa	0.00815375	0.631457	0.833	0.739	1	OHC	Rpsa
Dlgap1	0.00838619	1.29388	0.625	0.348	1	OHC	Dlgap1
Zranb2	0.00893397	0.698209	0.875	0.826	1	OHC	Zranb2
Tbc1d23	0.00931479	1.00827	0.625	0.478	1	OHC	Tbc1d23
Taf15	0.00935613	0.671723	0.854	0.783	1	OHC	Taf15
Sfi1	0.00956527	0.803006	0.833	0.87	1	OHC	Sfi1
Prmt3	0.00961432	0.931382	0.521	0.304	1	OHC	Prmt3
Mpped1	0.0096603	0.771929	0.25	0	1	OHC	Mpped1
Pbx1	0.00987271	0.521286	0.979	0.957	1	OHC	Pbx1
Ripor3	7.58638e-15	3.46406	0.957	0.021	1.83363e-10	IHC	Ripor3
Spock1	1.52254e-14	2.62832	0.957	0.021	3.67998e-10	IHC	Spock1
Dnajc5b	1.62419e-14	3.79709	0.957	0.042	3.92566e-10	IHC	Dnajc5b
Marchf4	1.74069e-14	2.80627	0.913	0	4.20726e-10	IHC	Marchf4
Bmper	6.87353e-14	3.35583	0.913	0.021	1.66133e-09	IHC	Bmper
Slc17a8	1.78015e-13	3.33222	0.957	0.083	4.30263e-09	IHC	Slc17a8
Ppp2r2b	2.20259e-13	3.77742	0.957	0.083	5.32366e-09	IHC	Ppp2r2b
Ralyl	5.08559e-13	4.11389	0.957	0.125	1.22919e-08	IHC	Ralyl
Tbx2	6.1939e-13	1.64557	0.957	0.042	1.49707e-08	IHC	Tbx2
Atp2a3	6.85877e-13	2.20427	0.826	0	1.65777e-08	IHC	Atp2a3
Rps6ka2	1.10629e-12	2.6093	0.913	0.042	2.6739e-08	IHC	Rps6ka2
Cdh18	1.4254e-12	3.89804	1	0.25	3.44518e-08	IHC	Cdh18
Slc7a14	2.64943e-12	2.32439	0.957	0.104	6.40367e-08	IHC	Slc7a14
Rims2	3.48608e-12	3.85878	0.957	0.229	8.42586e-08	IHC	Rims2
Alk	3.76249e-12	3.25482	0.826	0.021	9.09395e-08	IHC	Alk
Ap3s1	1.6684e-11	2.25513	0.957	0.208	4.03253e-07	IHC	Ap3s1
Prkd1	1.99931e-11	3.49925	0.957	0.271	4.83233e-07	IHC	Prkd1
Adam12	2.23067e-11	2.05452	0.739	0	5.39153e-07	IHC	Adam12
Syne1	2.66618e-11	2.14752	0.957	0.146	6.44415e-07	IHC	Syne1
Bcl2	3.48767e-11	2.48822	0.913	0.104	8.4297e-07	IHC	Bcl2
Nrxn1	4.42218e-11	3.58166	0.957	0.312	1.06884e-06	IHC	Nrxn1
Ano4	6.04767e-11	2.73904	0.957	0.167	1.46172e-06	IHC	Ano4
Kcnab1	6.92497e-11	3.69577	0.957	0.333	1.67377e-06	IHC	Kcnab1
Chrm3	9.04555e-11	2.88694	0.957	0.271	2.18631e-06	IHC	Chrm3
Otof	1.13275e-10	3.00881	0.957	0.375	2.73787e-06	IHC	Otof
Dynlt5	1.18813e-10	1.74512	0.696	0	2.87172e-06	IHC	Dynlt5
Osbpl6	1.29026e-10	3.1335	0.957	0.521	3.11855e-06	IHC	Osbpl6
Srrm4	1.33961e-10	1.40425	0.739	0.021	3.23783e-06	IHC	Srrm4
Kif13b	2.47151e-10	2.14623	0.957	0.312	5.97364e-06	IHC	Kif13b
Lpp	3.326e-10	2.00393	0.913	0.188	8.03894e-06	IHC	Lpp
Myo3a	4.89335e-10	2.36388	1	0.708	1.18272e-05	IHC	Myo3a
Cntnap3	6.05844e-10	2.08731	0.652	0	1.46433e-05	IHC	Cntnap3
Frmpd4	7.95721e-10	2.21975	1	0.792	1.92326e-05	IHC	Frmpd4
Klhl29	1.09577e-09	2.47886	0.957	0.333	2.64849e-05	IHC	Klhl29
Thsd7b	1.1752e-09	1.93226	0.87	0.125	2.84045e-05	IHC	Thsd7b
Tln2	1.30946e-09	1.86118	0.87	0.146	3.16497e-05	IHC	Tln2
Kifap3	1.46793e-09	2.38271	0.957	0.479	3.54798e-05	IHC	Kifap3
Pdcd6	1.59803e-09	1.83372	0.957	0.271	3.86243e-05	IHC	Pdcd6
Npas2	1.68937e-09	1.66013	0.696	0.021	4.0832e-05	IHC	Npas2
Igfbp5	2.14894e-09	2.48621	0.957	0.375	5.194e-05	IHC	Igfbp5
Syt14	2.21162e-09	2.00452	0.957	0.271	5.34548e-05	IHC	Syt14
Ntf3	2.96182e-09	1.54725	0.609	0	7.15873e-05	IHC	Ntf3
Pdzrn3	3.83856e-09	2.06212	0.957	0.354	9.2778e-05	IHC	Pdzrn3
Map4k4	3.99933e-09	2.3124	0.87	0.229	9.66637e-05	IHC	Map4k4
Tfg	4.74429e-09	1.71529	0.826	0.146	0.00011467	IHC	Tfg
Nkain2	4.90138e-09	1.84605	1	0.792	0.000118466	IHC	Nkain2
Bcas3os1	5.51696e-09	1.92808	0.739	0.062	0.000133345	IHC	Bcas3os1
Pgm2l1	5.89458e-09	1.73334	1	0.562	0.000142472	IHC	Pgm2l1
Bcl6	1.38038e-08	1.21147	0.783	0.083	0.000333637	IHC	Bcl6
Fat4	1.39028e-08	1.43046	0.565	0	0.000336032	IHC	Fat4
Ephx1	1.39028e-08	1.00822	0.565	0	0.000336032	IHC	Ephx1
Tspan5	1.50817e-08	1.62744	0.696	0.062	0.000364525	IHC	Tspan5
Daam1	1.75208e-08	1.15158	0.696	0.042	0.000423479	IHC	Daam1
Sema5b	1.803e-08	1.64138	0.87	0.146	0.000435786	IHC	Sema5b
Bin1	1.87786e-08	1.44718	0.826	0.125	0.000453879	IHC	Bin1
Ganc	1.89521e-08	1.68405	0.783	0.125	0.000458072	IHC	Ganc
Atp2b1	1.91954e-08	1.3674	1	0.521	0.000463953	IHC	Atp2b1
Crim1	1.98472e-08	1.36699	0.696	0.062	0.000479707	IHC	Crim1
Dock4	2.48073e-08	1.75545	0.913	0.25	0.000599592	IHC	Dock4
Slc24a3	2.66446e-08	1.97911	0.87	0.25	0.000644	IHC	Slc24a3
Fstl4	2.76278e-08	1.249	0.783	0.083	0.000667763	IHC	Fstl4
Hdac9	3.07975e-08	1.67122	1	0.875	0.000744375	IHC	Hdac9
Ptprz1	3.12137e-08	1.17057	0.696	0.062	0.000754435	IHC	Ptprz1
Lyst	3.75832e-08	1.73423	0.913	0.333	0.000908385	IHC	Lyst
Rorb	4.71652e-08	1.76669	1	0.938	0.00113998	IHC	Rorb
Garem1	6.38423e-08	2.36888	0.826	0.229	0.00154307	IHC	Garem1
Synrg	6.42369e-08	1.62559	0.957	0.542	0.00155261	IHC	Synrg
8030462N17Rik	6.95904e-08	1.40333	0.957	0.396	0.001682	IHC	8030462N17Rik
Pbx3	8.30402e-08	1.50073	0.913	0.229	0.00200708	IHC	Pbx3
Cep112	1.15222e-07	1.68503	0.739	0.104	0.00278492	IHC	Cep112
Casz1	1.17721e-07	1.6272	0.565	0.021	0.00284532	IHC	Casz1
Ric1	1.18141e-07	1.48101	0.957	0.271	0.00285547	IHC	Ric1
Peak1	1.49833e-07	1.44204	0.957	0.708	0.00362145	IHC	Peak1
Fcrlb	1.83299e-07	1.77976	0.783	0.167	0.00443033	IHC	Fcrlb
Npas3	1.89105e-07	2.07561	0.957	0.583	0.00457068	IHC	Npas3
Kcnma1	2.54546e-07	1.26909	1	1	0.00615238	IHC	Kcnma1
Dgkg	2.63792e-07	1.08319	0.609	0.042	0.00637585	IHC	Dgkg
Rerg	2.72831e-07	1.14769	0.478	0	0.00659432	IHC	Rerg
Gdnf	2.72831e-07	1.07134	0.478	0	0.00659432	IHC	Gdnf
1700064H15Rik	2.72831e-07	0.919368	0.478	0	0.00659432	IHC	1700064H15Rik
Adcy2	2.80697e-07	1.28586	0.739	0.104	0.00678446	IHC	Adcy2
Frmpd1	2.85743e-07	1.88203	0.696	0.104	0.0069064	IHC	Frmpd1
Gm13710	3.03028e-07	1.23946	0.565	0.042	0.00732419	IHC	Gm13710
Nfasc	3.07997e-07	1.48973	0.913	0.292	0.0074443	IHC	Nfasc
Tbc1d16	4.27159e-07	0.954526	0.696	0.083	0.0103244	IHC	Tbc1d16
Ank3	4.67777e-07	1.48553	0.957	0.896	0.0113062	IHC	Ank3
Ppp1r27	5.27576e-07	1.15296	0.739	0.104	0.0127515	IHC	Ppp1r27
Ecd	5.41688e-07	1.04426	0.783	0.146	0.0130926	IHC	Ecd
Clrn2	7.2326e-07	1.04413	0.522	0.021	0.0174812	IHC	Clrn2
Grm4	7.94171e-07	0.88509	0.522	0.021	0.0191951	IHC	Grm4
Gm34821	8.71754e-07	0.756174	0.522	0.021	0.0210703	IHC	Gm34821
Bmp8b	1.14431e-06	1.07202	0.435	0	0.027658	IHC	Bmp8b
1700029N11Rik	1.14431e-06	1.02936	0.435	0	0.027658	IHC	1700029N11Rik
Scn3b	1.14431e-06	1.00439	0.435	0	0.027658	IHC	Scn3b
Stk32c	1.14431e-06	0.840441	0.435	0	0.027658	IHC	Stk32c
Gm49948	1.14431e-06	0.832043	0.435	0	0.027658	IHC	Gm49948
Hira	1.14431e-06	0.789335	0.435	0	0.027658	IHC	Hira
Relt	1.25871e-06	0.826016	0.478	0.021	0.0304231	IHC	Relt
Slc38a1	1.4278e-06	1.29529	0.957	0.354	0.0345099	IHC	Slc38a1
Slc9a7	1.44061e-06	1.19739	0.739	0.146	0.0348196	IHC	Slc9a7
Ltbp1	1.64794e-06	1.30564	0.87	0.208	0.0398308	IHC	Ltbp1
Map3k20	1.81993e-06	1.24347	0.87	0.229	0.0439877	IHC	Map3k20
Tmod2	1.93315e-06	1.08424	0.957	0.292	0.0467242	IHC	Tmod2
Dlgap4	2.01556e-06	1.03152	0.696	0.104	0.0487161	IHC	Dlgap4
Gm30191	2.45967e-06	1.95459	0.826	0.25	0.0594503	IHC	Gm30191
A330015K06Rik	2.90567e-06	1.20715	0.565	0.062	0.0702301	IHC	A330015K06Rik
Rassf2	3.19353e-06	0.870496	0.478	0.021	0.0771876	IHC	Rassf2
Smarcal1	3.49856e-06	0.790463	0.478	0.021	0.0845602	IHC	Smarcal1
Wdr47	4.10589e-06	0.872091	0.609	0.083	0.0992393	IHC	Wdr47
Adamts6	4.35635e-06	1.48881	0.913	0.417	0.105293	IHC	Adamts6
Trim55	4.63859e-06	1.31172	0.391	0	0.112115	IHC	Trim55
Gm49364	4.63859e-06	0.771817	0.391	0	0.112115	IHC	Gm49364
Mlxipl	4.63859e-06	0.758963	0.391	0	0.112115	IHC	Mlxipl
Shc2	4.63859e-06	0.638436	0.391	0	0.112115	IHC	Shc2
D630045J12Rik	4.63859e-06	0.58741	0.391	0	0.112115	IHC	D630045J12Rik
Ldb3	4.83397e-06	0.961881	0.522	0.042	0.116837	IHC	Ldb3
Amot	4.83397e-06	0.881249	0.522	0.042	0.116837	IHC	Amot
Ola1	5.17121e-06	0.919424	0.609	0.083	0.124988	IHC	Ola1
Gdpd1	5.40744e-06	1.28228	0.783	0.208	0.130698	IHC	Gdpd1
Dennd5b	5.90131e-06	1.2443	0.913	0.542	0.142635	IHC	Dennd5b
Selenos	6.38919e-06	1.27781	0.696	0.167	0.154427	IHC	Selenos
Gm50410	6.75954e-06	0.839045	0.522	0.042	0.163378	IHC	Gm50410
Nck2	6.80328e-06	0.950131	0.87	0.271	0.164435	IHC	Nck2
Plekhm3	7.01828e-06	1.32362	0.696	0.146	0.169632	IHC	Plekhm3
Fhit	7.27927e-06	1.23589	0.739	0.167	0.17594	IHC	Fhit
Ehbp1	7.411e-06	1.12419	1	0.521	0.179124	IHC	Ehbp1
Ppm1h	7.47399e-06	1.34036	0.826	0.292	0.180646	IHC	Ppm1h
Epha7	7.62106e-06	1.07738	0.913	0.354	0.184201	IHC	Epha7
Cabp1	7.62216e-06	1.06677	0.739	0.188	0.184228	IHC	Cabp1
Gpr158	7.68681e-06	1.27156	0.565	0.083	0.18579	IHC	Gpr158
Wdr7	7.78316e-06	1.06885	1	0.708	0.188119	IHC	Wdr7
Kdm5b	8.15875e-06	1.12991	0.957	0.521	0.197197	IHC	Kdm5b
Gm42413	8.6413e-06	0.73333	0.435	0.021	0.20886	IHC	Gm42413
Gm4258	9.12715e-06	0.880711	0.783	0.208	0.220603	IHC	Gm4258
Abhd12	1.08446e-05	1.37022	0.826	0.292	0.262114	IHC	Abhd12
Dnm1	1.23136e-05	1.30875	0.913	0.438	0.297621	IHC	Dnm1
Vezt	1.23568e-05	1.19905	0.652	0.146	0.298665	IHC	Vezt
Ccn1	1.23905e-05	0.666033	0.435	0.021	0.299479	IHC	Ccn1
Gnaq	1.2963e-05	1.13813	0.957	0.521	0.313316	IHC	Gnaq
Lrrc52	1.45008e-05	1.0449	0.609	0.104	0.350484	IHC	Lrrc52
Ush1c	1.45448e-05	1.16418	1	0.812	0.351548	IHC	Ush1c
Tmem161b	1.62146e-05	0.897126	0.783	0.208	0.391907	IHC	Tmem161b
Zfp40	1.64507e-05	0.816795	0.478	0.042	0.397614	IHC	Zfp40
Prkra	1.72218e-05	1.00476	0.739	0.167	0.416251	IHC	Prkra
Mtss2	1.78599e-05	0.805191	0.478	0.042	0.431673	IHC	Mtss2
Cd82	1.78599e-05	0.682095	0.478	0.042	0.431673	IHC	Cd82
Gm13373	1.82091e-05	1.0272	0.348	0	0.440113	IHC	Gm13373
Gm36199	1.82091e-05	0.791659	0.348	0	0.440113	IHC	Gm36199
Dlk2	1.82091e-05	0.717895	0.348	0	0.440113	IHC	Dlk2
Ythdf1	1.89669e-05	0.717135	0.565	0.083	0.458429	IHC	Ythdf1
Ttc7b	1.9973e-05	0.647432	0.739	0.146	0.482748	IHC	Ttc7b
Gpsm2	2.0254e-05	1.01402	0.739	0.188	0.48954	IHC	Gpsm2
Tcaf1	2.15911e-05	1.16604	0.696	0.188	0.521857	IHC	Tcaf1
Dcaf10	2.22e-05	0.753638	0.609	0.104	0.536574	IHC	Dcaf10
Brap	2.47327e-05	0.683733	0.478	0.042	0.59779	IHC	Brap
Shtn1	2.55375e-05	0.890928	0.609	0.104	0.617242	IHC	Shtn1
Agbl4	2.59931e-05	1.42072	0.783	0.312	0.628253	IHC	Agbl4
Lmo3	2.622e-05	1.28975	0.565	0.104	0.633737	IHC	Lmo3
Ormdl3	2.70032e-05	0.68009	0.739	0.167	0.652667	IHC	Ormdl3
Adam22	2.83749e-05	1.20752	0.739	0.229	0.685821	IHC	Adam22
Iffo1	2.90497e-05	0.571514	0.478	0.042	0.702131	IHC	Iffo1
Tfec	2.98784e-05	0.66558	0.391	0.021	0.722162	IHC	Tfec
Scamp1	3.10683e-05	0.812679	0.652	0.125	0.750922	IHC	Scamp1
Trpm3	3.11517e-05	1.58784	0.957	0.5	0.752937	IHC	Trpm3
Dennd4a	3.32815e-05	1.13319	0.826	0.271	0.804414	IHC	Dennd4a
Rgs11	3.39779e-05	1.12218	0.739	0.208	0.821245	IHC	Rgs11
Ust	3.40794e-05	1.39316	0.739	0.229	0.823699	IHC	Ust
Nmnat3	3.54908e-05	0.592403	0.652	0.125	0.857812	IHC	Nmnat3
Hmbox1	3.59335e-05	0.778366	0.826	0.208	0.868512	IHC	Hmbox1
Mrps28	3.6077e-05	0.88622	0.652	0.146	0.871981	IHC	Mrps28
Rabep1	4.01689e-05	1.17391	0.913	0.562	0.970882	IHC	Rabep1
Klhl10	4.19884e-05	1.01978	0.609	0.125	1	IHC	Klhl10
Wdr72	4.25575e-05	0.845408	0.391	0.021	1	IHC	Wdr72
Pxdc1	4.37089e-05	1.1212	0.826	0.396	1	IHC	Pxdc1
Hivep2	4.39199e-05	1.09743	0.783	0.312	1	IHC	Hivep2
Unc80	4.56061e-05	0.894939	0.739	0.188	1	IHC	Unc80
Nmnat2	4.64465e-05	0.876184	0.391	0.021	1	IHC	Nmnat2
Chst9	4.71001e-05	1.04046	1	0.583	1	IHC	Chst9
Cracdl	4.74973e-05	0.886152	0.783	0.188	1	IHC	Cracdl
Tmem117	4.80554e-05	1.18599	0.957	0.833	1	IHC	Tmem117
Etl4	4.89352e-05	1.45406	0.826	0.25	1	IHC	Etl4
Ptbp3	4.89596e-05	1.11105	0.957	0.354	1	IHC	Ptbp3
Ireb2	4.93089e-05	0.739981	0.652	0.125	1	IHC	Ireb2
Adamts17	5.09418e-05	0.967593	0.609	0.146	1	IHC	Adamts17
Snd1	5.15477e-05	1.08332	0.913	0.396	1	IHC	Snd1
Fblim1	5.41617e-05	0.575778	0.435	0.042	1	IHC	Fblim1
Spata6	5.73159e-05	0.888422	0.478	0.062	1	IHC	Spata6
Lzts2	6.35404e-05	0.606823	0.435	0.042	1	IHC	Lzts2
Dlc1	6.37151e-05	1.0534	0.826	0.333	1	IHC	Dlc1
Tox	6.69211e-05	0.994299	0.957	0.75	1	IHC	Tox
Mcl1	6.87874e-05	0.524136	0.435	0.042	1	IHC	Mcl1
Kirrel3	6.93844e-05	1.03238	0.304	0	1	IHC	Kirrel3
Marchf11	6.93844e-05	0.719741	0.304	0	1	IHC	Marchf11
Cd96	6.93844e-05	0.672707	0.304	0	1	IHC	Cd96
Gm15270	6.93844e-05	0.613207	0.304	0	1	IHC	Gm15270
Anpep	6.93844e-05	0.5641	0.304	0	1	IHC	Anpep
Irgq	6.93844e-05	0.520613	0.304	0	1	IHC	Irgq
Sptbn2	6.93844e-05	0.432115	0.304	0	1	IHC	Sptbn2
Fgd6	7.17103e-05	0.765935	0.478	0.062	1	IHC	Fgd6
Dock7	7.31661e-05	0.857744	0.826	0.25	1	IHC	Dock7
Kcns3	7.40495e-05	0.924491	0.565	0.104	1	IHC	Kcns3
Arfgef1	7.41269e-05	0.794357	1	0.938	1	IHC	Arfgef1
Zmat3	7.44425e-05	0.695556	0.435	0.042	1	IHC	Zmat3
Eipr1	7.44425e-05	0.615456	0.435	0.042	1	IHC	Eipr1
Ttyh3	7.52727e-05	0.816563	0.696	0.167	1	IHC	Ttyh3
Ldlrad3	7.69642e-05	1.11192	0.652	0.167	1	IHC	Ldlrad3
Pi4kb	7.74312e-05	1.17964	0.826	0.375	1	IHC	Pi4kb
Ipo11	7.94928e-05	0.825406	0.783	0.229	1	IHC	Ipo11
Arvcf	8.05353e-05	0.80574	0.435	0.042	1	IHC	Arvcf
6430628N08Rik	8.31391e-05	0.556612	0.478	0.062	1	IHC	6430628N08Rik
Strn	8.35779e-05	0.83606	0.739	0.208	1	IHC	Strn
Gfod2	8.45985e-05	1.0029	0.696	0.188	1	IHC	Gfod2
Cdh2	8.60604e-05	1.09989	0.696	0.229	1	IHC	Cdh2
Os9	8.70975e-05	0.571878	0.435	0.042	1	IHC	Os9
Ing5	8.70975e-05	0.568219	0.435	0.042	1	IHC	Ing5
Gm17501	9.19288e-05	0.620897	0.348	0.021	1	IHC	Gm17501
Igdcc4	9.21375e-05	0.761734	0.609	0.125	1	IHC	Igdcc4
Pcx	9.33224e-05	1.0364	0.522	0.104	1	IHC	Pcx
Arhgap35	9.36866e-05	0.938893	0.913	0.292	1	IHC	Arhgap35
Prelid2	0.000100365	0.925814	0.348	0.021	1	IHC	Prelid2
Cpa6	0.000101066	0.82574	0.522	0.083	1	IHC	Cpa6
Rhpn1	0.000108291	0.701037	0.522	0.083	1	IHC	Rhpn1
Madd	0.000110962	0.931243	0.913	0.417	1	IHC	Madd
Osbpl11	0.000113903	1.12455	0.87	0.438	1	IHC	Osbpl11
Prkcd	0.000118415	0.929048	0.696	0.208	1	IHC	Prkcd
Rnf138	0.000118859	0.651575	0.609	0.125	1	IHC	Rnf138
Tspyl1	0.000119477	0.499812	0.348	0.021	1	IHC	Tspyl1
Tnrc6c	0.000129743	0.977833	0.913	0.417	1	IHC	Tnrc6c
Cyld	0.000129743	0.803703	0.913	0.417	1	IHC	Cyld
4933434E20Rik	0.000136448	0.536094	0.391	0.042	1	IHC	4933434E20Rik
Atxn7l1	0.000137789	0.846741	0.826	0.292	1	IHC	Atxn7l1
Baiap2l1	0.000148433	0.463132	0.478	0.062	1	IHC	Baiap2l1
Ssx2ip	0.000149229	0.853598	0.609	0.146	1	IHC	Ssx2ip
Cers6	0.000152325	0.768753	0.522	0.083	1	IHC	Cers6
Cry2	0.000154334	0.97335	0.652	0.188	1	IHC	Cry2
Kmt5a	0.000156452	0.588648	0.826	0.229	1	IHC	Kmt5a
Fam107b	0.000157098	1.28038	0.957	0.667	1	IHC	Fam107b
Dicer1	0.000157947	0.544323	0.739	0.188	1	IHC	Dicer1
Slc7a6os	0.000159373	0.4247	0.478	0.062	1	IHC	Slc7a6os
Pex5l	0.00016327	1.75374	0.522	0.125	1	IHC	Pex5l
Gm20045	0.000168441	0.507062	0.348	0.021	1	IHC	Gm20045
Bmpr1b	0.000169873	1.06241	0.913	0.479	1	IHC	Bmpr1b
Rbm5	0.000170652	0.813261	1	0.583	1	IHC	Rbm5
Kif16b	0.000172043	0.740065	0.913	0.333	1	IHC	Kif16b
Epn2	0.00017239	0.826865	0.652	0.146	1	IHC	Epn2
Abca3	0.000172661	0.579764	0.391	0.042	1	IHC	Abca3
Dnajc3	0.000173461	0.794886	0.652	0.188	1	IHC	Dnajc3
Scyl2	0.000174945	0.583784	0.435	0.062	1	IHC	Scyl2
Sfxn4	0.000183347	0.468457	0.348	0.021	1	IHC	Sfxn4
Pcyt1a	0.000183347	0.386501	0.348	0.021	1	IHC	Pcyt1a
Rai1	0.000183841	0.857578	0.652	0.188	1	IHC	Rai1
Gm4131	0.000185629	0.711594	0.565	0.104	1	IHC	Gm4131
Qdpr	0.000193974	0.904529	0.522	0.104	1	IHC	Qdpr
Atg3	0.000194802	0.614498	0.696	0.167	1	IHC	Atg3
Lamp2	0.000197701	1.15937	0.826	0.333	1	IHC	Lamp2
Osbpl3	0.000223365	0.920535	0.957	0.583	1	IHC	Osbpl3
Tmem178b	0.000226195	0.922396	0.783	0.271	1	IHC	Tmem178b
Pign	0.000232991	0.877651	0.913	0.375	1	IHC	Pign
Nectin2	0.000233394	0.692745	0.435	0.062	1	IHC	Nectin2
Edrf1	0.000233394	0.438056	0.435	0.062	1	IHC	Edrf1
Nxn	0.000240849	0.709176	0.696	0.188	1	IHC	Nxn
Prr16	0.000245984	0.863671	0.609	0.167	1	IHC	Prr16
Acbd4	0.000250637	0.645046	0.435	0.062	1	IHC	Acbd4
Ptpn11	0.000251166	0.545965	0.522	0.104	1	IHC	Ptpn11
Lgr5	0.000256906	0.759946	0.609	0.146	1	IHC	Lgr5
Gm27007	0.000257364	0.693385	0.261	0	1	IHC	Gm27007
Sema3d	0.000257364	0.664843	0.261	0	1	IHC	Sema3d
Nim1k	0.000257364	0.646005	0.261	0	1	IHC	Nim1k
Ccng1	0.000257364	0.63763	0.261	0	1	IHC	Ccng1
Coa5	0.000257364	0.538564	0.261	0	1	IHC	Coa5
Mea1	0.000257364	0.515485	0.261	0	1	IHC	Mea1
Nedd9	0.000257364	0.500786	0.261	0	1	IHC	Nedd9
Epha1	0.000257364	0.499343	0.261	0	1	IHC	Epha1
Prkaa1	0.000257364	0.497881	0.261	0	1	IHC	Prkaa1
Mapk15	0.000257364	0.459268	0.261	0	1	IHC	Mapk15
Gm26608	0.000257364	0.452419	0.261	0	1	IHC	Gm26608
Maneal	0.000257364	0.436349	0.261	0	1	IHC	Maneal
Gad2	0.000257364	0.432033	0.261	0	1	IHC	Gad2
Tymp	0.000257364	0.411049	0.261	0	1	IHC	Tymp
Cabp7	0.000257364	0.406608	0.261	0	1	IHC	Cabp7
Slc25a30	0.000257364	0.399735	0.261	0	1	IHC	Slc25a30
Lrrc9	0.000257364	0.333952	0.261	0	1	IHC	Lrrc9
Esf1	0.00026907	0.499935	0.435	0.062	1	IHC	Esf1
Zdhhc3	0.000269185	0.60057	0.652	0.167	1	IHC	Zdhhc3
Gab2	0.000273087	0.770378	0.957	0.438	1	IHC	Gab2
Tmprss6	0.000273789	0.452235	0.391	0.042	1	IHC	Tmprss6
Myt1	0.000284961	0.674696	0.696	0.188	1	IHC	Myt1
Trappc6a	0.000288767	0.587139	0.435	0.062	1	IHC	Trappc6a
Ica1	0.00028877	0.928708	0.826	0.292	1	IHC	Ica1
Mpp7	0.000292202	0.822132	1	0.812	1	IHC	Mpp7
Pde4dip	0.000292992	0.595361	0.652	0.146	1	IHC	Pde4dip
Cetn3	0.000296082	0.639452	0.565	0.125	1	IHC	Cetn3
Relch	0.000304953	0.886492	1	0.542	1	IHC	Relch
Cpeb4	0.000308099	0.983236	0.913	0.479	1	IHC	Cpeb4
Nol4l	0.00031835	0.611108	0.391	0.042	1	IHC	Nol4l
Armc9	0.000323895	0.646221	0.522	0.104	1	IHC	Armc9
Baiap2l2	0.000326601	0.885967	0.696	0.208	1	IHC	Baiap2l2
Gm43948	0.00033228	0.871035	0.435	0.062	1	IHC	Gm43948
Glmp	0.00033228	0.690635	0.435	0.062	1	IHC	Glmp
0610030E20Rik	0.00033228	0.630023	0.435	0.062	1	IHC	0610030E20Rik
Cdh13	0.000336163	1.25891	0.478	0.104	1	IHC	Cdh13
Zmym5	0.000338164	0.804752	0.652	0.167	1	IHC	Zmym5
Tmem127	0.000343095	0.385176	0.391	0.042	1	IHC	Tmem127
Ccdc162	0.000343095	0.357995	0.391	0.042	1	IHC	Ccdc162
Eif2a	0.000343095	0.270617	0.391	0.042	1	IHC	Eif2a
Pigu	0.000343095	0.258479	0.391	0.042	1	IHC	Pigu
Arl5a	0.000347865	0.937429	0.609	0.188	1	IHC	Arl5a
Myo18a	0.000348316	0.469553	0.652	0.146	1	IHC	Myo18a
Zfp397	0.000356269	0.534296	0.435	0.062	1	IHC	Zfp397
Isoc1	0.00035749	0.679872	0.304	0.021	1	IHC	Isoc1
Map3k1	0.00035749	0.483784	0.304	0.021	1	IHC	Map3k1
Ap3d1	0.000373827	0.678521	0.826	0.271	1	IHC	Ap3d1
Cdc42bpb	0.000375678	0.619608	0.696	0.188	1	IHC	Cdc42bpb
Gnl3l	0.000378035	0.563714	0.478	0.083	1	IHC	Gnl3l
A530016L24Rik	0.000378554	0.694581	0.652	0.167	1	IHC	A530016L24Rik
Fam222b	0.000387938	0.677662	0.783	0.25	1	IHC	Fam222b
Atp8b5	0.00038928	0.383432	0.304	0.021	1	IHC	Atp8b5
Hnrnph2	0.000390909	0.491754	0.522	0.104	1	IHC	Hnrnph2
Plppr5	0.000395778	0.903247	0.87	0.375	1	IHC	Plppr5
Med12l	0.000402589	0.811657	0.783	0.312	1	IHC	Med12l
Coq3	0.000409183	0.496983	0.435	0.062	1	IHC	Coq3
Rab1a	0.000413373	0.667234	0.739	0.229	1	IHC	Rab1a
Liph	0.000423696	0.708781	0.304	0.021	1	IHC	Liph
Rcan3	0.000424501	0.691641	0.348	0.042	1	IHC	Rcan3
Ppp2r1b	0.000430685	0.535386	0.478	0.083	1	IHC	Ppp2r1b
Srrm2	0.000431259	0.828018	0.957	1	1	IHC	Srrm2
Bdnf	0.000433674	1.08597	0.696	0.229	1	IHC	Bdnf
Pou6f1	0.000438312	0.493415	0.435	0.062	1	IHC	Pou6f1
ENSMUSG00000120058	0.000458238	0.633982	0.348	0.042	1	IHC	ENSMUSG00000120058
Atp6v1c2	0.000460097	0.531981	0.609	0.146	1	IHC	Atp6v1c2
Ciz1	0.000469368	0.541633	0.435	0.062	1	IHC	Ciz1
Slc9a9	0.000470089	0.83675	1	0.854	1	IHC	Slc9a9
Exoc6	0.000482034	0.773878	0.696	0.229	1	IHC	Exoc6
Enox1	0.000487667	0.87371	1	0.688	1	IHC	Enox1
Nipsnap1	0.000501215	0.506453	0.304	0.021	1	IHC	Nipsnap1
Spag9	0.000502567	0.769898	1	0.562	1	IHC	Spag9
Birc6	0.000511392	0.801685	0.957	0.438	1	IHC	Birc6
Tpm3	0.000516019	0.720614	0.391	0.062	1	IHC	Tpm3
Sh3gl2	0.000517344	0.906676	0.826	0.333	1	IHC	Sh3gl2
Pals1	0.000530345	0.669276	0.826	0.292	1	IHC	Pals1
Akap17b	0.000537731	0.355559	0.435	0.062	1	IHC	Akap17b
Gm36669	0.000544755	0.698741	0.304	0.021	1	IHC	Gm36669
B3glct	0.000544755	0.696113	0.304	0.021	1	IHC	B3glct
Mrps35	0.000544755	0.441606	0.304	0.021	1	IHC	Mrps35
Jmjd8	0.000544755	0.353142	0.304	0.021	1	IHC	Jmjd8
Zfp800	0.000557131	0.542176	0.478	0.083	1	IHC	Zfp800
Pla2g6	0.000557789	0.856112	0.478	0.104	1	IHC	Pla2g6
Hook3	0.000584359	0.786358	0.739	0.271	1	IHC	Hook3
Fam229b	0.000591797	0.502774	0.304	0.021	1	IHC	Fam229b
Kat6a	0.000609818	0.535412	0.739	0.208	1	IHC	Kat6a
Klf8	0.000619803	0.777543	0.348	0.042	1	IHC	Klf8
Ccnyl1	0.000619803	0.547435	0.348	0.042	1	IHC	Ccnyl1
Pdk1	0.000619803	0.491672	0.348	0.042	1	IHC	Pdk1
Wdfy2	0.000620561	0.754059	0.696	0.208	1	IHC	Wdfy2
Hsdl1	0.000632599	0.488081	0.478	0.083	1	IHC	Hsdl1
A430033K04Rik	0.000642599	0.435437	0.304	0.021	1	IHC	A430033K04Rik
Dnajb9	0.000642599	0.405813	0.304	0.021	1	IHC	Dnajb9
Rangap1	0.000642599	0.405216	0.304	0.021	1	IHC	Rangap1
Ttc4	0.000642599	0.364707	0.304	0.021	1	IHC	Ttc4
Plxnb1	0.000642599	0.358186	0.304	0.021	1	IHC	Plxnb1
Snap29	0.000642599	0.344239	0.304	0.021	1	IHC	Snap29
Cacfd1	0.000661973	0.760006	0.652	0.188	1	IHC	Cacfd1
Kif3c	0.000673802	0.390561	0.478	0.083	1	IHC	Kif3c
Cnksr2	0.000677836	0.457632	0.522	0.104	1	IHC	Cnksr2
Ago4	0.000713936	0.650965	0.478	0.104	1	IHC	Ago4
Uba6	0.00071405	0.614812	0.522	0.125	1	IHC	Uba6
Xrcc6	0.000719154	0.560795	0.348	0.042	1	IHC	Xrcc6
Inha	0.00075384	0.495356	0.435	0.083	1	IHC	Inha
Morn4	0.000756119	0.591098	0.565	0.146	1	IHC	Morn4
Dlst	0.000757018	0.521226	0.522	0.125	1	IHC	Dlst
Scaf1	0.000774201	0.468799	0.348	0.042	1	IHC	Scaf1
Nab1	0.000781176	0.609854	0.391	0.062	1	IHC	Nab1
Tjap1	0.000782111	0.747538	0.826	0.354	1	IHC	Tjap1
Gga1	0.000836097	0.442601	0.391	0.062	1	IHC	Gga1
Rflnb	0.000848392	0.766297	0.609	0.167	1	IHC	Rflnb
Pcgf5	0.000848392	0.63754	0.609	0.167	1	IHC	Pcgf5
Enah	0.000848607	0.760007	1	0.896	1	IHC	Enah
Plcxd2	0.000856567	0.725442	0.435	0.083	1	IHC	Plcxd2
Bcap29	0.000856567	0.44097	0.435	0.083	1	IHC	Bcap29
Uba52	0.000856725	0.64473	0.478	0.104	1	IHC	Uba52
Cst6	0.000877862	1.08002	0.522	0.146	1	IHC	Cst6
Sybu	0.000882569	0.807326	0.609	0.188	1	IHC	Sybu
Zyx	0.000894581	0.64446	0.391	0.062	1	IHC	Zyx
Cfap97	0.000894581	0.544193	0.391	0.062	1	IHC	Cfap97
Pigq	0.000894581	0.431199	0.391	0.062	1	IHC	Pigq
Rsl1d1	0.000896214	0.422472	0.348	0.042	1	IHC	Rsl1d1
Depdc7	0.000912664	0.527612	0.435	0.083	1	IHC	Depdc7
Megf9	0.000944132	0.541306	0.826	0.354	1	IHC	Megf9
Nr6a1	0.00095713	0.957293	0.826	0.479	1	IHC	Nr6a1
Jarid2	0.00095713	0.743493	0.913	0.438	1	IHC	Jarid2
Fhdc1	0.000963693	0.494954	0.348	0.042	1	IHC	Fhdc1
Ppp1r13b	0.000972149	0.621257	0.435	0.083	1	IHC	Ppp1r13b
Kif28	0.000973631	0.743036	0.783	0.312	1	IHC	Kif28
Ptprm	0.000987881	0.91382	0.957	0.542	1	IHC	Ptprm
Fxr2	0.00102309	0.48603	0.391	0.062	1	IHC	Fxr2
Rhbdd1	0.00102563	0.575542	0.478	0.104	1	IHC	Rhbdd1
Gm49513	0.00102563	0.502256	0.478	0.104	1	IHC	Gm49513
P2ry14	0.00103585	0.402093	0.348	0.042	1	IHC	P2ry14
P4hb	0.00103585	0.356278	0.348	0.042	1	IHC	P4hb
Slc29a1	0.00108047	0.630713	0.826	0.312	1	IHC	Slc29a1
Amph	0.00108099	0.836631	1	0.667	1	IHC	Amph
Acadm	0.00110203	0.535677	0.435	0.083	1	IHC	Acadm
Pcsk5	0.00110527	0.714422	1	0.938	1	IHC	Pcsk5
Sipa1l1	0.00110707	0.93526	0.913	0.583	1	IHC	Sipa1l1
Tmem11	0.00111298	0.370789	0.348	0.042	1	IHC	Tmem11
Snx9	0.00111298	0.266312	0.348	0.042	1	IHC	Snx9
Get4	0.00111298	0.255868	0.348	0.042	1	IHC	Get4
Crhbp	0.00111424	0.829973	0.565	0.146	1	IHC	Crhbp
Spata5	0.00113187	0.413842	0.522	0.125	1	IHC	Spata5
Magi2	0.00114697	0.808681	0.913	0.542	1	IHC	Magi2
Gm10649	0.00115481	0.393636	0.478	0.104	1	IHC	Gm10649
Rhot1	0.00116619	0.695369	0.652	0.208	1	IHC	Rhot1
Eif3e	0.0011685	0.473308	0.391	0.062	1	IHC	Eif3e
Tenm3	0.00117766	1.07384	0.652	0.25	1	IHC	Tenm3
E2f3	0.00119766	0.614294	0.522	0.125	1	IHC	E2f3
Unc79	0.00122931	0.883254	0.87	0.375	1	IHC	Unc79
Lrrfip1	0.00124781	0.387501	0.435	0.083	1	IHC	Lrrfip1
Osbpl2	0.00124816	0.391251	0.391	0.062	1	IHC	Osbpl2
Ring1	0.00124816	0.385586	0.391	0.062	1	IHC	Ring1
Ei24	0.00126696	0.353649	0.522	0.125	1	IHC	Ei24
Trim36	0.00132719	0.78557	0.913	0.521	1	IHC	Trim36
Nt5c3b	0.00133174	0.616174	0.696	0.229	1	IHC	Nt5c3b
Mtcl1	0.00133281	0.468807	0.391	0.062	1	IHC	Mtcl1
Sec23ip	0.00133281	0.457858	0.391	0.062	1	IHC	Sec23ip
Rtn4rl1	0.00133281	0.437968	0.391	0.062	1	IHC	Rtn4rl1
Mpv17l	0.00133995	0.384842	0.522	0.125	1	IHC	Mpv17l
6030407O03Rik	0.00134378	0.472706	0.261	0.021	1	IHC	6030407O03Rik
Zranb1	0.00135264	0.795786	0.783	0.312	1	IHC	Zranb1
Bbip1	0.00138373	0.498366	0.565	0.146	1	IHC	Bbip1
Pptc7	0.00138373	0.426687	0.565	0.146	1	IHC	Pptc7
Ptbp1	0.00138835	0.641432	0.696	0.25	1	IHC	Ptbp1
Hs2st1	0.0013994	0.476837	0.696	0.208	1	IHC	Hs2st1
Lrrc10b	0.00139969	0.978048	0.739	0.312	1	IHC	Lrrc10b
Tspan13	0.00141674	0.93107	0.783	0.312	1	IHC	Tspan13
Caprin2	0.00142273	0.413443	0.391	0.062	1	IHC	Caprin2
Zfp74	0.00145904	0.411763	0.261	0.021	1	IHC	Zfp74
Igsf9	0.00145904	0.322022	0.261	0.021	1	IHC	Igsf9
Nop58	0.00147856	0.776476	0.391	0.083	1	IHC	Nop58
Plekha5	0.0014939	0.767739	0.783	0.333	1	IHC	Plekha5
Ccdc59	0.00150011	0.49792	0.435	0.083	1	IHC	Ccdc59
Caml	0.00151821	0.290849	0.391	0.062	1	IHC	Caml
Sugct	0.00153694	0.788535	0.435	0.104	1	IHC	Sugct
Abca6	0.00154637	0.50564	0.478	0.104	1	IHC	Abca6
Abr	0.00155274	0.781757	0.826	0.417	1	IHC	Abr
Zmym2	0.0015636	0.638602	0.826	0.354	1	IHC	Zmym2
Shfl	0.00158334	0.434581	0.261	0.021	1	IHC	Shfl
Tbc1d22a	0.00161295	0.675708	0.522	0.146	1	IHC	Tbc1d22a
Thrb	0.00163528	0.871006	0.913	0.583	1	IHC	Thrb
Ide	0.00165391	0.556115	0.652	0.208	1	IHC	Ide
Zfp180	0.00169358	0.421369	0.435	0.083	1	IHC	Zfp180
Klf13	0.00169358	0.308997	0.435	0.083	1	IHC	Klf13
Pde4b	0.00169509	1.30692	0.609	0.229	1	IHC	Pde4b
Lcorl	0.00170468	0.528985	0.913	0.438	1	IHC	Lcorl
Cavin2	0.00171733	0.522919	0.261	0.021	1	IHC	Cavin2
Atxn1l	0.00171733	0.468332	0.261	0.021	1	IHC	Atxn1l
Kremen1	0.00171768	0.486046	0.304	0.042	1	IHC	Kremen1
Ankrd13d	0.00173474	0.52209	0.478	0.104	1	IHC	Ankrd13d
Vti1a	0.00175365	0.627424	0.826	0.333	1	IHC	Vti1a
Scd1	0.0017686	0.829608	0.565	0.188	1	IHC	Scd1
Kdelr2	0.00179714	0.544442	0.348	0.062	1	IHC	Kdelr2
Rnls	0.00181719	0.655002	0.609	0.188	1	IHC	Rnls
Uimc1	0.00182436	0.528832	0.652	0.208	1	IHC	Uimc1
Dgkb	0.00184637	1.42954	0.304	0.042	1	IHC	Dgkb
ENSMUSG00000120162	0.00184637	0.706273	0.304	0.042	1	IHC	ENSMUSG00000120162
Popdc3	0.00185054	0.532826	0.652	0.188	1	IHC	Popdc3
Gm14066	0.00186168	0.954301	0.261	0.021	1	IHC	Gm14066
Sharpin	0.00186168	0.438741	0.261	0.021	1	IHC	Sharpin
Dtna	0.00187157	0.699089	1	0.75	1	IHC	Dtna
Zbtb11	0.00189475	0.508743	0.522	0.146	1	IHC	Zbtb11
Usp45	0.00193933	0.517501	0.565	0.167	1	IHC	Usp45
Hecw2	0.00195218	0.376579	0.739	0.25	1	IHC	Hecw2
Mal2	0.00198387	0.425325	0.304	0.042	1	IHC	Mal2
Fmn1	0.00199831	0.636005	0.522	0.146	1	IHC	Fmn1
B3galt9	0.00201662	0.993131	0.391	0.083	1	IHC	B3galt9
Esd	0.00201662	0.684914	0.391	0.083	1	IHC	Esd
Grm8	0.0020171	0.74398	0.261	0.021	1	IHC	Grm8
Wdr3	0.0020171	0.468555	0.261	0.021	1	IHC	Wdr3
Mccc2	0.0020171	0.46596	0.261	0.021	1	IHC	Mccc2
Agfg2	0.0020171	0.465355	0.261	0.021	1	IHC	Agfg2
Insyn1	0.0020171	0.448816	0.261	0.021	1	IHC	Insyn1
E4f1	0.0020171	0.429697	0.261	0.021	1	IHC	E4f1
Gm4107	0.0020171	0.403959	0.261	0.021	1	IHC	Gm4107
Ipo5	0.00202711	0.354876	0.435	0.083	1	IHC	Ipo5
Zmiz1	0.00202803	0.6748	0.826	0.438	1	IHC	Zmiz1
Man2a2	0.0020313	0.614988	0.696	0.25	1	IHC	Man2a2
Hmgcr	0.00205039	0.692062	0.348	0.062	1	IHC	Hmgcr
Nrep	0.00208219	0.57847	0.478	0.125	1	IHC	Nrep
Grxcr2	0.00211033	0.662021	0.609	0.188	1	IHC	Grxcr2
Ift88	0.00214377	0.566239	0.391	0.083	1	IHC	Ift88
Cdc27	0.0021652	0.627584	0.565	0.188	1	IHC	Cdc27
Dlgap2	0.00218434	0.468933	0.261	0.021	1	IHC	Dlgap2
Kcnq3	0.00218434	0.439124	0.261	0.021	1	IHC	Kcnq3
Sptlc1	0.00218434	0.37643	0.261	0.021	1	IHC	Sptlc1
Kctd13	0.00218434	0.370148	0.261	0.021	1	IHC	Kctd13
Shisal1	0.00218434	0.361641	0.261	0.021	1	IHC	Shisal1
4930405A21Rik	0.00218434	0.30921	0.261	0.021	1	IHC	4930405A21Rik
Pcgf1	0.00218434	0.275882	0.261	0.021	1	IHC	Pcgf1
Irf2bpl	0.00218434	0.251389	0.261	0.021	1	IHC	Irf2bpl
B4galnt3	0.00218894	0.705552	0.348	0.062	1	IHC	B4galnt3
Gpr89	0.00222115	0.564713	0.522	0.146	1	IHC	Gpr89
Setd3	0.00225641	0.56591	0.696	0.229	1	IHC	Setd3
C1galt1	0.00227634	0.711912	0.565	0.188	1	IHC	C1galt1
Clcn3	0.00228066	0.834648	0.739	0.333	1	IHC	Clcn3
Fgd1	0.00228745	0.441641	0.304	0.042	1	IHC	Fgd1
Cmtm4	0.002378	0.582782	0.565	0.167	1	IHC	Cmtm4
Pibf1	0.00237966	0.662925	0.652	0.229	1	IHC	Pibf1
Upp2	0.00241897	0.623153	0.739	0.312	1	IHC	Upp2
Hnrnpll	0.0024464	0.493904	0.435	0.104	1	IHC	Hnrnpll
Iars2	0.00245365	0.473353	0.478	0.125	1	IHC	Iars2
Dpp4	0.0024547	0.772477	0.304	0.042	1	IHC	Dpp4
Zfp710	0.00246657	0.568291	0.522	0.146	1	IHC	Zfp710
Prss36	0.0024921	0.308325	0.348	0.062	1	IHC	Prss36
Cd164l2	0.00249724	0.675193	1	0.75	1	IHC	Cd164l2
Prpsap1	0.0025068	0.722645	0.565	0.208	1	IHC	Prpsap1
Sclt1	0.00254764	0.74503	0.913	0.5	1	IHC	Sclt1
Dmxl2	0.00256163	0.793612	0.652	0.271	1	IHC	Dmxl2
Lsm4	0.00257059	0.607007	0.391	0.083	1	IHC	Lsm4
Pkn1	0.00257059	0.452847	0.391	0.083	1	IHC	Pkn1
Rragb	0.00258953	0.484923	0.435	0.104	1	IHC	Rragb
Fbrsl1	0.00258953	0.466323	0.435	0.104	1	IHC	Fbrsl1
Zfp410	0.00259035	0.558525	0.478	0.125	1	IHC	Zfp410
Vamp8	0.00259836	0.509224	0.522	0.146	1	IHC	Vamp8
Hspa14	0.00260258	0.688145	0.609	0.208	1	IHC	Hspa14
Trmt1l	0.00262984	0.483649	0.565	0.167	1	IHC	Trmt1l
Bet1l	0.00263306	0.480323	0.304	0.042	1	IHC	Bet1l
Ccnjl	0.00263306	0.468196	0.304	0.042	1	IHC	Ccnjl
Tcf3	0.00263306	0.337744	0.304	0.042	1	IHC	Tcf3
Acbd3	0.00264366	0.460525	0.783	0.292	1	IHC	Acbd3
Smarcd2	0.00265766	0.671033	0.348	0.062	1	IHC	Smarcd2
Pdgfc	0.00265766	0.643808	0.348	0.062	1	IHC	Pdgfc
M6pr	0.00265766	0.428415	0.348	0.062	1	IHC	M6pr
Acaca	0.00271027	0.527749	0.87	0.375	1	IHC	Acaca
Exoc6b	0.00271877	0.631886	0.957	0.646	1	IHC	Exoc6b
Vps72	0.00272929	0.61927	0.391	0.083	1	IHC	Vps72
Ccnh	0.00272929	0.573398	0.391	0.083	1	IHC	Ccnh
Ccdc148	0.00272929	0.549682	0.391	0.083	1	IHC	Ccdc148
Atp6ap1	0.00273398	0.546619	0.478	0.125	1	IHC	Atp6ap1
Slc5a3	0.00273657	0.435313	0.522	0.146	1	IHC	Slc5a3
Rab11fip3	0.00281213	0.436328	0.739	0.271	1	IHC	Rab11fip3
Mettl17	0.00283322	0.372304	0.348	0.062	1	IHC	Mettl17
Ppfibp1	0.0028969	0.591114	0.391	0.083	1	IHC	Ppfibp1
Ipo8	0.00289901	0.580965	0.435	0.104	1	IHC	Ipo8
Sec14l1	0.00289901	0.48876	0.435	0.104	1	IHC	Sec14l1
Znrf1	0.00289901	0.483424	0.435	0.104	1	IHC	Znrf1
Rad54l2	0.00290585	0.484732	0.565	0.167	1	IHC	Rad54l2
Fktn	0.00290585	0.457521	0.565	0.167	1	IHC	Fktn
4932438A13Rik	0.00291606	0.779389	0.87	0.5	1	IHC	4932438A13Rik
Dnaja2	0.00294484	0.503446	0.652	0.208	1	IHC	Dnaja2
Rnf130	0.00294484	0.41867	0.652	0.208	1	IHC	Rnf130
Pjvk	0.00300638	0.821459	0.652	0.229	1	IHC	Pjvk
Nsun6	0.00302579	0.46508	0.304	0.042	1	IHC	Nsun6
Dgat1	0.00302579	0.445212	0.304	0.042	1	IHC	Dgat1
Rfc2	0.00302579	0.408196	0.304	0.042	1	IHC	Rfc2
Slc11a2	0.00302579	0.406028	0.304	0.042	1	IHC	Slc11a2
Elp6	0.00302579	0.36569	0.304	0.042	1	IHC	Elp6
Aldoc	0.00302579	0.354221	0.304	0.042	1	IHC	Aldoc
Samd1	0.00302579	0.322114	0.304	0.042	1	IHC	Samd1
Tmem50b	0.00302579	0.31659	0.304	0.042	1	IHC	Tmem50b
Atp2c1	0.00303331	0.487238	0.522	0.146	1	IHC	Atp2c1
Sf3b1	0.00303964	0.537107	0.783	0.333	1	IHC	Sf3b1
Far1	0.00305119	1.07822	0.826	0.375	1	IHC	Far1
Pcbp3	0.00305204	0.654501	0.739	0.292	1	IHC	Pcbp3
Smarcb1	0.00306609	0.408519	0.435	0.104	1	IHC	Smarcb1
Cyb5b	0.00307385	0.446081	0.391	0.083	1	IHC	Cyb5b
Nedd4l	0.00317714	0.778125	0.478	0.146	1	IHC	Nedd4l
Spsb4	0.00321649	0.449352	0.348	0.062	1	IHC	Spsb4
Nckap1	0.00323901	0.775272	0.87	0.625	1	IHC	Nckap1
Znhit1	0.00324157	0.436816	0.304	0.042	1	IHC	Znhit1
Tmem39b	0.00324157	0.351445	0.304	0.042	1	IHC	Tmem39b
Unc13a	0.00324157	0.295453	0.304	0.042	1	IHC	Unc13a
Gcnt4	0.00324157	0.280036	0.304	0.042	1	IHC	Gcnt4
Tnfrsf12a	0.00324157	0.278457	0.304	0.042	1	IHC	Tnfrsf12a
Pmpca	0.00324157	0.256018	0.304	0.042	1	IHC	Pmpca
Sgta	0.00324191	0.502269	0.435	0.104	1	IHC	Sgta
Ergic3	0.0032606	0.456615	0.391	0.083	1	IHC	Ergic3
Rexo5	0.0032606	0.406928	0.391	0.083	1	IHC	Rexo5
Pik3c2b	0.00326913	0.426634	0.609	0.188	1	IHC	Pik3c2b
Ahi1	0.00331213	0.771998	0.739	0.354	1	IHC	Ahi1
Xrcc5	0.00338701	0.401285	0.652	0.208	1	IHC	Xrcc5
Zdhhc23	0.00342534	0.435093	0.348	0.062	1	IHC	Zdhhc23
Nucb1	0.00342534	0.382741	0.348	0.062	1	IHC	Nucb1
Mtus2	0.00342687	0.438167	0.435	0.104	1	IHC	Mtus2
Tcf12	0.00344437	0.577927	0.913	0.583	1	IHC	Tcf12
Commd4	0.00345763	0.450715	0.391	0.083	1	IHC	Commd4
Lrrc45	0.00345763	0.398329	0.391	0.083	1	IHC	Lrrc45
Ppp2r2c	0.00347128	0.292771	0.304	0.042	1	IHC	Ppp2r2c
Picalm	0.00348801	0.583066	0.826	0.396	1	IHC	Picalm
Tmod3	0.00350935	0.528825	0.739	0.271	1	IHC	Tmod3
Map2k2	0.00352855	0.690033	0.739	0.333	1	IHC	Map2k2
Ahctf1	0.00353863	0.423283	0.565	0.167	1	IHC	Ahctf1
Stk38	0.00357425	0.37027	0.696	0.229	1	IHC	Stk38
Synj2	0.00357681	0.710295	0.87	0.5	1	IHC	Synj2
Rgl1	0.00361241	0.498849	0.652	0.229	1	IHC	Rgl1
Eif3h	0.00362138	0.43785	0.435	0.104	1	IHC	Eif3h
Myh14	0.00362138	0.283752	0.435	0.104	1	IHC	Myh14
Tmem175	0.00364645	0.425859	0.348	0.062	1	IHC	Tmem175
Srek1	0.00375896	0.631225	0.826	0.5	1	IHC	Srek1
Tnik	0.00379766	0.546918	0.609	0.208	1	IHC	Tnik
Wasf3	0.00379766	0.521869	0.609	0.208	1	IHC	Wasf3
Tmtc3	0.00380075	0.71042	0.609	0.229	1	IHC	Tmtc3
Slc6a6	0.00382589	0.495719	0.435	0.104	1	IHC	Slc6a6
Tmem39a	0.00382589	0.334169	0.435	0.104	1	IHC	Tmem39a
E230025N22Rik	0.00384126	0.379411	0.87	0.354	1	IHC	E230025N22Rik
Cfap47	0.00388047	0.425616	0.348	0.062	1	IHC	Cfap47
1110059E24Rik	0.00388047	0.412535	0.348	0.062	1	IHC	1110059E24Rik
Lman2	0.00388047	0.360395	0.348	0.062	1	IHC	Lman2
Pvt1	0.00389382	0.574057	0.565	0.188	1	IHC	Pvt1
Man1a2	0.00391001	0.607721	0.739	0.312	1	IHC	Man1a2
Copa	0.00401909	0.427497	0.696	0.25	1	IHC	Copa
Slc2a13	0.00402197	0.543837	1	0.646	1	IHC	Slc2a13
Ankle2	0.0041155	0.462036	0.391	0.083	1	IHC	Ankle2
Ccdc30	0.0041155	0.382865	0.391	0.083	1	IHC	Ccdc30
Cttn	0.0041155	0.348557	0.391	0.083	1	IHC	Cttn
Ttc27	0.00412806	0.354754	0.348	0.062	1	IHC	Ttc27
Cfap418	0.00412806	0.28773	0.348	0.062	1	IHC	Cfap418
Prep	0.00417238	0.347529	0.478	0.125	1	IHC	Prep
Dcp2	0.00426669	0.310466	0.435	0.104	1	IHC	Dcp2
Acsl3	0.00431749	0.486634	0.739	0.292	1	IHC	Acsl3
Znrf3	0.0043177	0.339171	0.522	0.146	1	IHC	Znrf3
Otud5	0.00436159	0.571468	0.609	0.208	1	IHC	Otud5
Gmcl1	0.0043899	0.307105	0.348	0.062	1	IHC	Gmcl1
Hook1	0.0044683	0.544523	0.913	0.417	1	IHC	Hook1
Rrm2b	0.0046667	0.298561	0.348	0.062	1	IHC	Rrm2b
A930009A15Rik	0.00471626	0.669478	0.783	0.396	1	IHC	A930009A15Rik
Rap1gds1	0.00474446	0.490166	0.87	0.438	1	IHC	Rap1gds1
Zfp326	0.00475305	0.363569	0.435	0.104	1	IHC	Zfp326
Cdc5l	0.00476886	0.619902	0.609	0.229	1	IHC	Cdc5l
Neo1	0.00486865	0.750896	0.565	0.208	1	IHC	Neo1
Ppcdc	0.00486901	0.361322	0.478	0.125	1	IHC	Ppcdc
Polr3a	0.00501459	0.377162	0.435	0.104	1	IHC	Polr3a
Abl2	0.00503829	0.498014	0.783	0.333	1	IHC	Abl2
Orc5	0.0051633	0.453628	0.565	0.188	1	IHC	Orc5
Apbb2	0.00518304	0.752674	0.913	0.521	1	IHC	Apbb2
D8Ertd738e	0.00518409	0.456103	0.522	0.167	1	IHC	D8Ertd738e
Dctn2	0.00521526	0.43724	0.609	0.188	1	IHC	Dctn2
Sec24c	0.00528907	0.381646	0.435	0.104	1	IHC	Sec24c
Ubxn2b	0.00528907	0.375242	0.435	0.104	1	IHC	Ubxn2b
Cep152	0.00533097	0.458717	0.261	0.042	1	IHC	Cep152
Preb	0.0053902	0.451722	0.478	0.125	1	IHC	Preb
Zfp276	0.0053902	0.390444	0.478	0.125	1	IHC	Zfp276
Crem	0.00540801	0.566453	0.565	0.188	1	IHC	Crem
Kif2a	0.00541919	0.576571	0.913	0.438	1	IHC	Kif2a
Hdac3	0.00551799	0.476224	0.522	0.146	1	IHC	Hdac3
Akap13	0.00555107	0.756068	0.696	0.271	1	IHC	Akap13
Stau2	0.00569841	0.63165	0.609	0.229	1	IHC	Stau2
Gskip	0.00571075	0.452312	0.261	0.042	1	IHC	Gskip
Srrm3	0.00577433	0.5998	1	0.604	1	IHC	Srrm3
Stim1	0.00578246	0.34255	0.391	0.083	1	IHC	Stim1
Map2k6	0.00579146	0.382179	0.522	0.146	1	IHC	Map2k6
Ints6	0.00582869	0.632301	0.739	0.333	1	IHC	Ints6
Ddx5	0.005938	0.548614	1	0.771	1	IHC	Ddx5
Zfp563	0.00603332	0.539435	0.435	0.125	1	IHC	Zfp563
1810013L24Rik	0.00612409	0.516971	0.478	0.146	1	IHC	1810013L24Rik
Cldn9	0.00615524	0.548041	0.609	0.25	1	IHC	Cldn9
Arhgap32	0.00616841	0.692594	0.652	0.292	1	IHC	Arhgap32
Golga4	0.00617628	0.503222	0.783	0.333	1	IHC	Golga4
2510002D24Rik	0.00625515	0.659895	0.609	0.208	1	IHC	2510002D24Rik
Gm16201	0.00629237	0.427329	0.304	0.062	1	IHC	Gm16201
Rnf13	0.00642695	0.389473	0.652	0.229	1	IHC	Rnf13
Vta1	0.00643043	0.518364	0.478	0.146	1	IHC	Vta1
Smarcc2	0.00649495	0.483257	0.565	0.188	1	IHC	Smarcc2
Eny2	0.00649495	0.480394	0.565	0.188	1	IHC	Eny2
Atg7	0.00653811	0.509692	0.348	0.083	1	IHC	Atg7
Rnd2	0.00654434	0.473932	0.261	0.042	1	IHC	Rnd2
Zup1	0.00658626	0.276855	0.478	0.125	1	IHC	Zup1
Reps1	0.00659895	0.698112	0.609	0.271	1	IHC	Reps1
Igf2bp3	0.00663113	0.454092	0.391	0.104	1	IHC	Igf2bp3
Tmtc1	0.00668835	0.900627	0.957	0.833	1	IHC	Tmtc1
Kcnh8	0.0067344	0.698744	1	0.896	1	IHC	Kcnh8
Nek7	0.00688199	0.61044	0.826	0.458	1	IHC	Nek7
Ehd4	0.00699386	0.468589	0.391	0.104	1	IHC	Ehd4
Lpin1	0.00700087	0.52803	0.261	0.042	1	IHC	Lpin1
Hmgcl	0.00700087	0.419453	0.261	0.042	1	IHC	Hmgcl
Odf3l2	0.00700087	0.308489	0.261	0.042	1	IHC	Odf3l2
Ppt1	0.00702662	0.337079	0.435	0.125	1	IHC	Ppt1
Etnk1	0.00706149	0.532807	0.957	0.688	1	IHC	Etnk1
Me3	0.00711278	0.57409	0.304	0.062	1	IHC	Me3
Capg	0.00711278	0.534679	0.304	0.062	1	IHC	Capg
Utp14a	0.00711278	0.436859	0.304	0.062	1	IHC	Utp14a
Arsk	0.00711278	0.382852	0.304	0.062	1	IHC	Arsk
Pls3	0.00732146	0.460593	0.348	0.083	1	IHC	Pls3
Zfp516	0.00732641	0.412665	0.652	0.271	1	IHC	Zfp516
C130071C03Rik	0.00737431	0.460763	0.391	0.104	1	IHC	C130071C03Rik
Cep95	0.00738898	0.486862	0.435	0.125	1	IHC	Cep95
Trak2	0.00738898	0.407119	0.435	0.125	1	IHC	Trak2
Abhd16a	0.00740072	0.628661	0.609	0.229	1	IHC	Abhd16a
Ntm	0.00745006	0.810078	0.435	0.146	1	IHC	Ntm
Suz12	0.00745578	0.358728	0.609	0.208	1	IHC	Suz12
Arhgap5	0.0074735	0.493689	0.826	0.396	1	IHC	Arhgap5
Msra	0.00748581	0.474226	0.261	0.042	1	IHC	Msra
Lmbr1l	0.00748581	0.277048	0.261	0.042	1	IHC	Lmbr1l
Rusf1	0.00748581	0.260884	0.261	0.042	1	IHC	Rusf1
Samd4b	0.00748581	0.259623	0.261	0.042	1	IHC	Samd4b
Aldh6a1	0.00755797	0.431342	0.304	0.062	1	IHC	Aldh6a1
Snx21	0.00776801	0.468196	0.435	0.125	1	IHC	Snx21
Dek	0.00777459	0.39368	0.565	0.188	1	IHC	Dek
Fan1	0.00800065	0.607838	0.261	0.042	1	IHC	Fan1
Trnau1ap	0.00800065	0.457819	0.261	0.042	1	IHC	Trnau1ap
Zfp212	0.00800065	0.396864	0.261	0.042	1	IHC	Zfp212
Pcnx3	0.00800065	0.29039	0.261	0.042	1	IHC	Pcnx3
Rilpl1	0.00802799	0.319111	0.304	0.062	1	IHC	Rilpl1
Rab6a	0.00803853	0.579392	0.739	0.333	1	IHC	Rab6a
Adamts19	0.008188	0.344551	0.348	0.083	1	IHC	Adamts19
Rhou	0.00819138	0.393848	0.391	0.104	1	IHC	Rhou
Bag6	0.00819138	0.339671	0.391	0.104	1	IHC	Bag6
Septin4	0.00822787	0.601488	0.783	0.438	1	IHC	Septin4
Acvr1	0.00826368	0.638081	0.478	0.167	1	IHC	Acvr1
Tmem216	0.00827842	0.484396	0.522	0.167	1	IHC	Tmem216
Zfhx4	0.00841234	0.536531	0.609	0.229	1	IHC	Zfhx4
Zfp462	0.00846278	0.603751	0.957	0.812	1	IHC	Zfp462
Limch1	0.0084828	0.667502	0.783	0.479	1	IHC	Limch1
Lncppara	0.00849553	0.273367	0.565	0.188	1	IHC	Lncppara
Cfap54	0.008524	0.440522	0.304	0.062	1	IHC	Cfap54
Myo10	0.008524	0.35605	0.304	0.062	1	IHC	Myo10
Grb10	0.008524	0.310474	0.304	0.062	1	IHC	Grb10
Nfxl1	0.008524	0.287382	0.304	0.062	1	IHC	Nfxl1
Tars2	0.008524	0.273634	0.304	0.062	1	IHC	Tars2
Rnaseh1	0.00854697	0.414814	0.261	0.042	1	IHC	Rnaseh1
Wipf2	0.00862954	0.486302	0.391	0.104	1	IHC	Wipf2
Pggt1b	0.00862954	0.466267	0.391	0.104	1	IHC	Pggt1b
Tgoln1	0.00862954	0.268922	0.391	0.104	1	IHC	Tgoln1
Plch1	0.0086646	0.582685	0.522	0.167	1	IHC	Plch1
Mtus1	0.00871187	0.695593	0.783	0.417	1	IHC	Mtus1
Sbno1	0.00888876	0.614957	0.696	0.333	1	IHC	Sbno1
Mocs2	0.0089896	0.278096	0.478	0.146	1	IHC	Mocs2
Srrt	0.00901181	0.317306	0.435	0.125	1	IHC	Srrt
Itgb1bp1	0.00904724	0.4229	0.304	0.062	1	IHC	Itgb1bp1
Zer1	0.00908853	0.328541	0.391	0.104	1	IHC	Zer1
Elf2	0.00911738	0.433971	0.696	0.271	1	IHC	Elf2
Cyth2	0.00912641	0.397788	0.261	0.042	1	IHC	Cyth2
Pcgf2	0.00912641	0.390457	0.261	0.042	1	IHC	Pcgf2
0610043K17Rik	0.00912641	0.38736	0.261	0.042	1	IHC	0610043K17Rik
Eola1	0.00912641	0.352512	0.261	0.042	1	IHC	Eola1
Ppcs	0.00912641	0.346506	0.261	0.042	1	IHC	Ppcs
Arhgap26	0.00912641	0.336268	0.261	0.042	1	IHC	Arhgap26
Lsm8	0.00912641	0.333019	0.261	0.042	1	IHC	Lsm8
Triqk	0.00912641	0.328798	0.261	0.042	1	IHC	Triqk
Rusc1	0.00912641	0.295099	0.261	0.042	1	IHC	Rusc1
Ccdc43	0.00912641	0.283405	0.261	0.042	1	IHC	Ccdc43
Dnai4	0.00912641	0.263737	0.261	0.042	1	IHC	Dnai4
Syvn1	0.00914521	0.328689	0.348	0.083	1	IHC	Syvn1
Slc1a5	0.00924495	0.345082	0.609	0.208	1	IHC	Slc1a5
Dcp1a	0.00927567	0.391952	0.565	0.188	1	IHC	Dcp1a
Ppp1r12a	0.00939733	0.457241	0.87	0.375	1	IHC	Ppp1r12a
Cers5	0.00940974	0.463079	0.652	0.25	1	IHC	Cers5
Zswim8	0.00942138	0.294539	0.478	0.146	1	IHC	Zswim8
Uso1	0.0094643	0.36395	0.435	0.125	1	IHC	Uso1
Lgmn	0.0094643	0.296707	0.435	0.125	1	IHC	Lgmn
Tmcc1	0.00948908	0.600326	0.87	0.583	1	IHC	Tmcc1
Asb3	0.00954591	0.499347	0.609	0.229	1	IHC	Asb3
Brd2	0.0095692	0.268781	0.391	0.104	1	IHC	Brd2
Dip2a	0.00959897	0.343239	0.304	0.062	1	IHC	Dip2a
Fzd4	0.00959897	0.292268	0.304	0.062	1	IHC	Fzd4
Tmem53	0.00959897	0.285397	0.304	0.062	1	IHC	Tmem53
Scai	0.00960876	0.497151	0.696	0.312	1	IHC	Scai
Adgra3	0.0096603	0.323228	0.348	0.083	1	IHC	Adgra3
Trim62	0.0096603	0.258435	0.348	0.083	1	IHC	Trim62
Pradc1	0.00974066	0.346013	0.261	0.042	1	IHC	Pradc1
Anxa7	0.00974066	0.280544	0.261	0.042	1	IHC	Anxa7
Nudt16l1	0.00974066	0.278185	0.261	0.042	1	IHC	Nudt16l1
Upf3a	0.00974066	0.277839	0.261	0.042	1	IHC	Upf3a
Cbx5	0.00979856	0.656781	0.565	0.271	1	IHC	Cbx5
Rpl22l1	0.00979963	0.274501	0.739	0.292	1	IHC	Rpl22l1
Osbpl1a	0.00983974	0.674095	0.957	0.542	1	IHC	Osbpl1a
9230102O04Rik	0.00993694	0.317105	0.435	0.125	1	IHC	9230102O04Rik
